# Supplementary material for: Epigenetic regulation of lateralized fetal spinal gene expression underlies hemispheric asymmetries
Source: eLife. 2017 Feb 1;6:e22784. doi: 10.7554/eLife.22784 (PMC5295814; doi:10.7554/eLife.22784)
Supplement: Figure 1—source data 1. — DOI: http://dx.doi.org/10.7554/eLife.22784.003 [file elife-22784-fig1-data1.xlsx]

## Sheet: 8 weeks PC
Asymmetrically expressed genes in the spinal cord at 8 weeks PC
ensembl_gene_id	gene	log2(fold change)
ENSG00000125834	STK35	-6.52735
ENSG00000078699	CBFA2T2	-6.43784
ENSG00000089123	TASP1	-5.47622
ENSG00000157869	HSP90AB2P,RAB28	-5.26933
ENSG00000152990	GPR125	-5.2615
ENSG00000156026	MCU	-5.2346
ENSG00000139910	NOVA1	-3.65524
ENSG00000184613	NELL2	-3.53492
ENSG00000167552	TUBA1A	-3.43199
ENSG00000003096	KLHL13	-3.21156
ENSG00000116106	EPHA4	-2.94164
ENSG00000164692	COL1A2	-2.90591
ENSG00000104361	NIPAL2	-2.76693
ENSG00000124529	HIST1H4C	-2.56811
ENSG00000011465	DCN	-2.35423
ENSG00000118564	FBXL5	-2.29049
ENSG00000106536	POU6F2	-2.16509
ENSG00000111877	MCM9	-2.15762
ENSG00000168542	COL3A1	-2.14804
ENSG00000109819	PPARGC1A	-2.12101
ENSG00000143702	CEP170	-2.09308
ENSG00000198366	HIST1H3C	-2.06946
ENSG00000088727	KIF9	-2.04242
ENSG00000144278	GALNT13	-2.04172
ENSG00000197106	SLC6A17	-2.0318
ENSG00000144320	KIAA1715	-2.00015
ENSG00000245573	BDNF-AS	-1.94234
ENSG00000123243	ITIH5	-1.83868
ENSG00000163393	SLC22A15	-1.83137
ENSG00000155893	ACPL2	-1.8008
ENSG00000069020	MAST4	-1.79263
ENSG00000184903	IMMP2L	-1.76015
ENSG00000162104	ADCY9,RP11-462G12.1,RP11-462G12.2	-1.73892
ENSG00000129538	RNASE1	-1.73491
ENSG00000089682	RBM41	-1.70448
ENSG00000149970	CNKSR2	-1.63214
ENSG00000184258	CDR1	-1.61171
ENSG00000203780	FANK1	-1.55948
ENSG00000153993	SEMA3D	-1.53798
ENSG00000071859	FAM50A	1.50031
ENSG00000100813	ACIN1,CDH24	1.50124
ENSG00000221850	GLI4,ZFP41	1.50154
ENSG00000111652	COPS7A	1.502
ENSG00000178467	P4HTM	1.50275
ENSG00000097007	ABL1	1.50321
ENSG00000160613	PCSK7	1.50322
ENSG00000110274	CEP164	1.50369
ENSG00000159596	TMEM69	1.50419
ENSG00000103275	UBE2I	1.50442
ENSG00000164171	ITGA2	1.50453
ENSG00000164897	TMUB1	1.50514
ENSG00000162714	ZNF496	1.50558
ENSG00000106244	PDAP1	1.5056
ENSG00000038358	EDC4	1.50572
ENSG00000175265	GOLGA8A,GOLGA8B	1.50617
ENSG00000149923	PPP4C	1.50648
ENSG00000135966	TGFBRAP1	1.50766
ENSG00000100926	RP11-468E2.2,TM9SF1	1.50841
ENSG00000142655	PEX14	1.50858
ENSG00000189067	LITAF	1.50864
ENSG00000185825	BCAP31	1.50926
ENSG00000218510	LINC00339	1.50975
ENSG00000075188	NUP37	1.51026
ENSG00000128039	SRD5A3	1.51047
ENSG00000108262	GIT1	1.51053
ENSG00000139546	TARBP2	1.51113
ENSG00000124313	IQSEC2	1.51127
ENSG00000117143	UAP1	1.51172
ENSG00000103042	SLC38A7	1.51222
ENSG00000169635	HIC2	1.51282
ENSG00000082512	TRAF5	1.51428
ENSG00000116786	PLEKHM2	1.51542
ENSG00000167700	MFSD3	1.51578
ENSG00000131470	PSMC3IP	1.51679
ENSG00000178202	KDELC2	1.518
ENSG00000106803	SEC61B	1.51829
ENSG00000185591	SP1	1.51898
ENSG00000070047	PHRF1	1.51899
ENSG00000068354	TBC1D25	1.51906
ENSG00000141391	RP11-861E21.1,SLMO1	1.51925
ENSG00000198329	CENPBD1	1.52147
ENSG00000172803	SNX32	1.52248
ENSG00000176422	SPRYD4	1.52292
ENSG00000101150	TPD52L2	1.52305
ENSG00000136463	RP11-51F16.9,TACO1	1.52324
ENSG00000112029	FBXO5	1.52352
ENSG00000131591	C1orf159	1.5237
ENSG00000163597	SNHG16	1.52417
ENSG00000102225	CDK16	1.52417
ENSG00000167807	CTD-2369P2.10,FDX1L,ICAM3,RAVER1	1.52664
ENSG00000166135	HIF1AN	1.52679
ENSG00000161547	SRSF2	1.527
ENSG00000140521	POLG	1.52834
ENSG00000124214	STAU1	1.52986
ENSG00000177663	CECR7,IL17RA	1.53024
ENSG00000072501	SMC1A	1.53036
ENSG00000169714	CNBP	1.53071
ENSG00000118705	RPN2	1.53113
ENSG00000111348	ARHGDIB,ERP27	1.53204
ENSG00000187741	FANCA	1.53209
ENSG00000131067	GGT7	1.53261
ENSG00000111196	MAGOHB	1.53367
ENSG00000002822	MAD1L1	1.53632
ENSG00000173486	FKBP2	1.53704
ENSG00000066117	SMARCD1	1.5382
ENSG00000167565	SERTAD3	1.53826
ENSG00000126709	IFI6	1.53852
ENSG00000126602	TRAP1	1.54062
ENSG00000181588	MEX3D	1.54098
ENSG00000110107	PRPF19	1.54139
ENSG00000166986	MARS	1.54154
ENSG00000035141	FAM136A	1.54229
ENSG00000148248	SURF4	1.54345
ENSG00000108384	RAD51C	1.54376
ENSG00000164062	APEH	1.54382
ENSG00000213906	LTB4R2,NOP9	1.54398
ENSG00000161395	PGAP3	1.54443
ENSG00000118960	HS1BP3,HS1BP3-IT1	1.54459
ENSG00000167774	NDUFA7	1.54485
ENSG00000165233	C9orf89	1.54556
ENSG00000104886	PLEKHJ1	1.54614
ENSG00000213928	IRF9,RNF31	1.54706
ENSG00000108819	PPP1R9B	1.54751
ENSG00000136480	POLG2	1.5489
ENSG00000204682	C10orf114	1.54944
ENSG00000143977	SNRPG	1.55018
ENSG00000127054	CPSF3L	1.55101
ENSG00000107281	NPDC1	1.55121
ENSG00000169972	PUSL1	1.5513
ENSG00000048392	RRM2B	1.55259
ENSG00000206206	DAXX	1.55335
ENSG00000117691	NENF	1.55401
ENSG00000112312	GMNN	1.55407
ENSG00000115289	PCGF1	1.55413
ENSG00000138623	SEMA7A	1.55477
ENSG00000172336	POP7	1.55525
ENSG00000159210	SNF8	1.55564
ENSG00000109089	CDR2L	1.55573
ENSG00000163507	KIAA1524	1.55588
ENSG00000126226	PCID2	1.55653
ENSG00000184220	CMSS1	1.55858
ENSG00000103274	NUBP1	1.55904
ENSG00000143258	USP21	1.55941
ENSG00000205937	RNPS1	1.5607
ENSG00000116898	MRPS15	1.56168
ENSG00000140575	IQGAP1	1.5617
ENSG00000160284	SPATC1L	1.5618
ENSG00000106789	CORO2A	1.56214
ENSG00000128595	CALU	1.56214
ENSG00000104946	TBC1D17	1.56375
ENSG00000148667	SNRPD2	1.56408
ENSG00000100376	FAM118A	1.56412
ENSG00000114395	CYB561D2	1.56695
ENSG00000086015	MAST2	1.5671
ENSG00000163584	RPL22L1	1.56877
ENSG00000112659	CUL9	1.56882
ENSG00000165527	ARF6	1.56916
ENSG00000095380	NANS	1.5702
ENSG00000166965	RCCD1	1.57067
ENSG00000100441	KHNYN	1.57116
ENSG00000134697	GNL2	1.57131
ENSG00000197930	ERO1L	1.57132
ENSG00000126768	TIMM17B	1.57174
ENSG00000171206	TRIM8	1.57174
ENSG00000099991	CABIN1	1.5732
ENSG00000174738	NR1D2	1.57379
ENSG00000174547	MRPL11	1.57448
ENSG00000099875	MKNK2	1.57496
ENSG00000165916	PSMC3	1.57542
ENSG00000132591	ERAL1	1.57566
ENSG00000137193	PIM1	1.57614
ENSG00000148719	DNAJB12	1.57641
ENSG00000173113	TRMT112	1.57647
ENSG00000144677	CTDSPL	1.57715
ENSG00000155090	KLF10	1.57791
ENSG00000234616	JRK	1.57791
ENSG00000177542	SLC25A22	1.5781
ENSG00000206476	VARS2	1.57827
ENSG00000136718	IMP4	1.57853
ENSG00000215908	CROCCP2	1.57903
ENSG00000169689	STRA13	1.57927
ENSG00000163235	TGFA	1.58024
ENSG00000104738	MCM4	1.58139
ENSG00000139722	VPS37B	1.58296
ENSG00000004478	FKBP4	1.58341
ENSG00000072506	HSD17B10	1.58395
ENSG00000106105	GARS	1.58423
ENSG00000131480	AOC2,PSME3	1.5847
ENSG00000115414	FN1	1.58484
ENSG00000115568	ZNF142	1.58528
ENSG00000116062	MSH6	1.58731
ENSG00000119826	RPS12	1.58734
ENSG00000163710	PCOLCE2	1.58741
ENSG00000140263	SORD	1.58794
ENSG00000068697	LAPTM4A	1.59021
ENSG00000149260	CAPN5	1.59238
ENSG00000179218	CALR	1.59286
ENSG00000025770	NCAPH2	1.59315
ENSG00000161671	EMC10	1.59457
ENSG00000177548	RABEP2	1.5957
ENSG00000139921	TMX1	1.59571
ENSG00000169375	SIN3A	1.59584
ENSG00000168067	MAP4K2	1.59639
ENSG00000171262	FAM98B	1.59758
ENSG00000182010	RTKN2	1.59778
ENSG00000151576	QTRTD1	1.59881
ENSG00000166794	PPIB	1.59951
ENSG00000141013	GAS8	1.60056
ENSG00000188827	SLX4	1.6013
ENSG00000099797	TECR	1.60243
ENSG00000109118	PHF12	1.60256
ENSG00000122490	PQLC1	1.60393
ENSG00000111642	CHD4	1.60685
ENSG00000085662	AKR1B1	1.60711
ENSG00000104812	GYS1	1.60819
ENSG00000177425	PAWR	1.60937
ENSG00000184640	40057	1.61166
ENSG00000114779	ABHD14B,PCBP4	1.61171
ENSG00000165609	NUDT5	1.61226
ENSG00000143373	ZNF687	1.61272
ENSG00000145391	RP11-308D13.3,SETD7	1.61313
ENSG00000165801	ARHGEF40	1.61344
ENSG00000180182	MED14	1.61349
ENSG00000167085	PHB	1.61352
ENSG00000107404	DVL1	1.61417
ENSG00000187051	RPS19BP1	1.61468
ENSG00000151838	CCDC175	1.61517
ENSG00000111639	MRPL51	1.61628
ENSG00000143314	MRPL24	1.61739
ENSG00000196976	LAGE3	1.61933
ENSG00000096384	HSP90AB1	1.62025
ENSG00000111364	DDX55	1.6204
ENSG00000125818	PSMF1,RP4-545L17.7	1.62069
ENSG00000138829	FBN2	1.62088
ENSG00000100034	PPM1F	1.62184
ENSG00000099956	SMARCB1	1.62224
ENSG00000125648	SLC25A23,SLC25A41	1.62257
ENSG00000118193	KIF14	1.62266
ENSG00000119042	SATB2	1.62324
ENSG00000115486	GGCX	1.62384
ENSG00000100908	EMC9	1.62477
ENSG00000103222	ABCC1	1.62507
ENSG00000176876	PXMP2	1.62522
ENSG00000167258	CDK12	1.62525
ENSG00000146540	C7orf50	1.62656
ENSG00000104365	IKBKB	1.62692
ENSG00000068097	HEATR6	1.62709
ENSG00000100445	SDR39U1	1.62843
ENSG00000104228	TRIM35	1.62868
ENSG00000148341	SH3GLB2	1.62914
ENSG00000136518	ACTL6A	1.62934
ENSG00000096155	BAG6	1.63061
ENSG00000131941	RHPN2	1.63194
ENSG00000172985	SH3RF3	1.6329
ENSG00000122729	ACO1	1.63472
ENSG00000179958	DCTPP1	1.63487
ENSG00000188917	RP3-341D10.4,TRMT2B	1.63633
ENSG00000096060	FKBP5	1.63746
ENSG00000215077	BRD2	1.63778
ENSG00000159256	MORC3	1.63785
ENSG00000143793	C1orf35	1.63804
ENSG00000135862	LAMC1	1.63845
ENSG00000130254	SAFB2	1.63875
ENSG00000101400	SNTA1	1.63914
ENSG00000172757	CFL1	1.63981
ENSG00000084093	REST	1.64162
ENSG00000184083	FAM120C	1.64439
ENSG00000170854	MINA	1.64478
ENSG00000103024	NME3	1.64559
ENSG00000251322	SHANK3	1.64768
ENSG00000135637	CCDC142	1.64844
ENSG00000157778	PSMG3	1.64844
ENSG00000159266	PLEKHM1P,hsa-mir-6080	1.64911
ENSG00000149091	DGKZ	1.64926
ENSG00000068308	OTUD5	1.64981
ENSG00000185551	NR2F2	1.64999
ENSG00000104884	ERCC2	1.65017
ENSG00000196636	ACN9	1.65032
ENSG00000182858	ALG12	1.65424
ENSG00000170214	ADRA1B	1.65461
ENSG00000175221	MED16	1.65551
ENSG00000137275	RIPK1	1.6562
ENSG00000144120	TMEM177	1.65682
ENSG00000141295	SCRN2	1.65844
ENSG00000166130	IKBIP	1.65911
ENSG00000161010	C5orf45,TBC1D9B	1.65922
ENSG00000006210	CX3CL1	1.65927
ENSG00000108883	EFTUD2	1.66411
ENSG00000124562	SNRPC	1.66473
ENSG00000148291	SURF2	1.66568
ENSG00000140443	IGF1R	1.66572
ENSG00000008300	CELSR3,NCKIPSD	1.66604
ENSG00000137054	POLR1E	1.66618
ENSG00000125995	ROMO1	1.66648
ENSG00000130305	NSUN5,NSUN5P2	1.66682
ENSG00000023191	RNH1	1.66766
ENSG00000141503	MINK1	1.66963
ENSG00000106080	FKBP14	1.67167
ENSG00000166845	C18orf54	1.67168
ENSG00000055044	NOP58	1.67417
ENSG00000053372	MRTO4	1.67483
ENSG00000156599	ZDHHC5	1.67537
ENSG00000163719	MTMR14	1.67652
ENSG00000204198	LYPLA2	1.67709
ENSG00000196449	YRDC	1.67747
ENSG00000160214	RRP1	1.67954
ENSG00000163399	ATP1A1	1.68059
ENSG00000111332	H2AFJ	1.6808
ENSG00000184792	MORC2-AS1,OSBP2	1.68184
ENSG00000106346	USP42	1.68415
ENSG00000126804	ZBTB1	1.68486
ENSG00000057019	DCBLD2	1.68527
ENSG00000162851	TFB2M	1.68567
ENSG00000079805	DNM2	1.68585
ENSG00000146263	MMS22L	1.68593
ENSG00000100348	TXN2	1.68613
ENSG00000184164	CRELD2	1.68715
ENSG00000205560	CHKB,CHKB-CPT1B	1.68757
ENSG00000137288	MNF1	1.68816
ENSG00000164054	SHISA5	1.68819
ENSG00000133789	SWAP70	1.68879
ENSG00000160256	FAM207A	1.68989
ENSG00000019549	SNAI2	1.69038
ENSG00000137124	ALDH1B1	1.69044
ENSG00000008513	ST3GAL1	1.69048
ENSG00000119707	RBM25	1.69053
ENSG00000165480	SKA3	1.6911
ENSG00000133119	RFC3	1.69257
ENSG00000137700	SLC37A4	1.69358
ENSG00000105298	CACTIN	1.69361
ENSG00000049089	COL9A2	1.69378
ENSG00000141696	LEPREL4	1.69639
ENSG00000066044	ELAVL1	1.69651
ENSG00000108424	KPNB1	1.69777
ENSG00000087842	PIR	1.69814
ENSG00000130164	LDLR	1.69885
ENSG00000120314	WDR55	1.69913
ENSG00000163702	IL17RC	1.70047
ENSG00000131748	STARD3,TCAP	1.70149
ENSG00000173227	SYT12	1.70205
ENSG00000165688	PMPCA	1.70278
ENSG00000173153	ESRRA	1.70308
ENSG00000065802	ASB1	1.70456
ENSG00000174099	MSRB3	1.70495
ENSG00000182154	MRPL41	1.70617
ENSG00000130985	UBA1	1.7068
ENSG00000118900	UBN1	1.70725
ENSG00000164967	RPP25L	1.70765
ENSG00000169813	HNRNPF	1.70839
ENSG00000099625	C19orf26	1.70854
ENSG00000175634	RPS6KB2	1.70882
ENSG00000182953	RPS28	1.70951
ENSG00000105552	BCAT2	1.70968
ENSG00000166908	PIP4K2C	1.70985
ENSG00000173818	ENDOV	1.71025
ENSG00000177169	ULK1	1.71059
ENSG00000003056	M6PR	1.71117
ENSG00000103855	CD276	1.71308
ENSG00000220912	SUMO3	1.71374
ENSG00000142731	PLK4	1.71416
ENSG00000180902	D2HGDH	1.71447
ENSG00000099940	SNAP29	1.71521
ENSG00000141564	RPTOR	1.71535
ENSG00000203993	C9orf37	1.71578
ENSG00000179918	SEPHS2	1.71595
ENSG00000119812	FAM98A	1.71641
ENSG00000188976	NOC2L	1.71727
ENSG00000116273	PHF13	1.71851
ENSG00000204305	AGER	1.71911
ENSG00000169696	ASPSCR1	1.72009
ENSG00000167378	IRGQ	1.72165
ENSG00000132017	DCAF15	1.72293
ENSG00000143398	PIP5K1A	1.7233
ENSG00000123353	ORMDL2	1.7239
ENSG00000101442	ACTR5	1.72424
ENSG00000136026	CKAP4	1.7243
ENSG00000160633	SAFB	1.72439
ENSG00000103507	BCKDK	1.72524
ENSG00000169062	UPF3A	1.72604
ENSG00000196696	PDXDC2P	1.72734
ENSG00000149136	SSRP1	1.72865
ENSG00000156983	BRPF1	1.72947
ENSG00000186866	POFUT2	1.72985
ENSG00000133247	SUV420H2	1.73028
ENSG00000068438	FTSJ1	1.73032
ENSG00000135632	SMYD5	1.73142
ENSG00000218891	ZNF579	1.73184
ENSG00000164045	CDC25A	1.73213
ENSG00000108591	DRG2	1.73234
ENSG00000166333	ILK	1.73243
ENSG00000169684	CHRNA5	1.73262
ENSG00000099949	LZTR1	1.73322
ENSG00000105556	MIER2	1.73465
ENSG00000171960	PPIH,RP5-994D16.3	1.73569
ENSG00000148308	GTF3C5	1.73631
ENSG00000140829	DHX38	1.73649
ENSG00000163933	RFT1	1.73656
ENSG00000006831	ADIPOR2	1.73669
ENSG00000149925	ALDOA	1.73678
ENSG00000119616	FCF1	1.73734
ENSG00000134533	RERG	1.73849
ENSG00000099899	TRMT2A	1.73859
ENSG00000108829	LRRC59	1.73952
ENSG00000122965	RBM19	1.74081
ENSG00000125841	NRSN2	1.74095
ENSG00000216450	BMS1P4,RP11-464F9.1	1.74102
ENSG00000126456	IRF3	1.74174
ENSG00000174177	CTU2	1.74275
ENSG00000127580	WDR24	1.74318
ENSG00000104805	NUCB1	1.74331
ENSG00000198055	GRK6	1.74338
ENSG00000070614	NDST1	1.74396
ENSG00000165502	RPL36AL	1.74525
ENSG00000176248	ANAPC2	1.74596
ENSG00000179085	DPM3	1.74638
ENSG00000128789	AP005482.1,PSMG2	1.74792
ENSG00000138794	CASP6	1.74964
ENSG00000137804	NUSAP1	1.74984
ENSG00000162885	B3GALNT2	1.75039
ENSG00000160991	ORAI2	1.75278
ENSG00000111640	GAPDH	1.75441
ENSG00000221978	CCNL2	1.75449
ENSG00000204592	HLA-E	1.7548
ENSG00000048828	FAM120A	1.75512
ENSG00000167889	MGAT5B	1.75583
ENSG00000176994	SMCR8	1.75636
ENSG00000048140	TSPAN17	1.75658
ENSG00000103152	MPG	1.7581
ENSG00000104889	RNASEH2A	1.75915
ENSG00000159111	MRPL10	1.76037
ENSG00000077348	EXOSC5	1.76099
ENSG00000182379	NXPH4	1.76168
ENSG00000161013	MGAT4B	1.76223
ENSG00000090447	TFAP4	1.76491
ENSG00000152291	TGOLN2	1.76575
ENSG00000035403	VCL	1.7662
ENSG00000218802	TMA7	1.76639
ENSG00000173171	MTX1	1.767
ENSG00000001617	SEMA3F	1.76782
ENSG00000172878	METAP1D	1.76838
ENSG00000110237	ARHGEF17	1.76955
ENSG00000164068	RNF123	1.76997
ENSG00000164442	CITED2	1.77302
ENSG00000100632	ERH	1.77319
ENSG00000117592	PRDX6	1.77433
ENSG00000142453	CARM1	1.77495
ENSG00000100983	GSS	1.77536
ENSG00000161791	FMNL3	1.7755
ENSG00000137133	HINT2	1.77639
ENSG00000137404	NRM,PPP1R18	1.77738
ENSG00000185359	HGS	1.77792
ENSG00000103111	MON1B,SYCE1L	1.77915
ENSG00000076003	MCM6	1.78075
ENSG00000168994	PXDC1	1.78122
ENSG00000144785	CNPY2,CS,PAN2	1.78705
ENSG00000161036	LRWD1	1.78772
ENSG00000109674	NEIL3	1.78779
ENSG00000117650	NEK2	1.78793
ENSG00000119689	DLST	1.7896
ENSG00000146826	C7orf43	1.78971
ENSG00000112183	RBM24	1.79082
ENSG00000104312	RIPK2	1.7911
ENSG00000168268	NT5DC2	1.7912
ENSG00000188878	FBF1,RP11-552F3.12	1.79159
ENSG00000124593	PRICKLE4	1.79264
ENSG00000112877	CEP72	1.79299
ENSG00000105373	GLTSCR2	1.79304
ENSG00000109501	WFS1	1.79574
ENSG00000187630	DHRS4L2	1.79654
ENSG00000086232	EIF2AK1	1.79659
ENSG00000136856	SLC2A8	1.79681
ENSG00000181396	OGFOD3	1.7985
ENSG00000163113	OTUD7B	1.79944
ENSG00000176720	BOK	1.80011
ENSG00000181817	LSM10,STK40	1.80014
ENSG00000132109	TRIM21	1.80088
ENSG00000187951	ARHGAP11B	1.80223
ENSG00000125457	MIF4GD	1.80235
ENSG00000145861	C1QTNF2,CCNJL	1.80235
ENSG00000120913	AC037459.4,PDLIM2	1.80273
ENSG00000121775	TMEM39B	1.80328
ENSG00000172137	CALB2	1.80535
ENSG00000135213	PMS2P3,POM121C	1.80546
ENSG00000113140	SPARC	1.80849
ENSG00000169047	IRS1	1.81006
ENSG00000119138	KLF9	1.81195
ENSG00000174749	C4orf32	1.81206
ENSG00000148229	POLE3	1.81316
ENSG00000162576	MXRA8	1.8142
ENSG00000142207	URB1	1.81514
ENSG00000172922	RNASEH2C	1.81567
ENSG00000118557	PMFBP1,RP11-328J14.1,U6	1.8179
ENSG00000140553	UNC45A	1.81836
ENSG00000204438	GPANK1	1.81917
ENSG00000101109	STK4	1.82127
ENSG00000024526	DEPDC1	1.82134
ENSG00000116871	MAP7D1	1.82221
ENSG00000165244	ZNF367	1.8238
ENSG00000184785	SMIM10	1.82565
ENSG00000170385	SLC30A1	1.82797
ENSG00000061936	SFSWAP	1.82849
ENSG00000128335	APOL2	1.82921
ENSG00000054392	HHAT	1.83031
ENSG00000165283	STOML2	1.83076
ENSG00000071127	RP11-448G15.3,WDR1	1.83116
ENSG00000204227	RING1	1.83118
ENSG00000169592	INO80E	1.8316
ENSG00000153044	CENPH	1.83405
ENSG00000167716	WDR81	1.83482
ENSG00000173402	DAG1	1.83511
ENSG00000101216	GMEB2	1.8354
ENSG00000111325	OGFOD2,RP11-197N18.2	1.83617
ENSG00000183395	PMCH	1.83761
ENSG00000100577	GSTZ1	1.83762
ENSG00000017797	RALBP1	1.83788
ENSG00000136908	DPM2	1.8379
ENSG00000078804	TP53INP2	1.83959
ENSG00000089154	GCN1L1	1.84034
ENSG00000120948	TARDBP	1.84092
ENSG00000116128	BCL9	1.84166
ENSG00000105197	TIMM50	1.84195
ENSG00000196363	WDR5	1.84201
ENSG00000129351	ILF3	1.84216
ENSG00000105618	PRPF31	1.84319
ENSG00000103043	VAC14	1.84459
ENSG00000132780	NASP	1.84509
ENSG00000186575	NF2	1.84993
ENSG00000165733	BMS1	1.85043
ENSG00000113716	HMGXB3	1.85062
ENSG00000157637	SLC38A10	1.85149
ENSG00000160949	TONSL,VPS28	1.85231
ENSG00000147799	ARHGAP39,LRRC24	1.85473
ENSG00000105341	ATP5SL	1.8549
ENSG00000151718	WWC2	1.85498
ENSG00000198542	ITGBL1	1.85552
ENSG00000147955	SIGMAR1	1.85585
ENSG00000157654	AKAP2,PALM2,PALM2-AKAP2	1.8561
ENSG00000171700	RGS19	1.85639
ENSG00000142409	ZNF787	1.85671
ENSG00000105976	MET	1.85761
ENSG00000120539	MASTL	1.85772
ENSG00000136699	SMPD4	1.85846
ENSG00000169727	GPS1	1.85981
ENSG00000143569	UBAP2L	1.86008
ENSG00000175901	BAIAP2-AS1	1.86306
ENSG00000172432	GTPBP2	1.86324
ENSG00000087269	NOP14	1.86371
ENSG00000160220	PWP2	1.86387
ENSG00000112941	PAPD7	1.86464
ENSG00000108592	FTSJ3	1.86472
ENSG00000189306	RRP7A	1.86568
ENSG00000070159	PTPN3	1.86624
ENSG00000112658	SRF	1.86683
ENSG00000135185	TMEM243	1.86684
ENSG00000176454	LPCAT4	1.86688
ENSG00000130749	ZC3H4	1.86692
ENSG00000157510	AFAP1L1	1.86703
ENSG00000110092	CCND1	1.868
ENSG00000142156	COL6A1	1.86802
ENSG00000131153	GINS2	1.86941
ENSG00000115211	EIF2B4	1.87018
ENSG00000129187	DCTD	1.87224
ENSG00000173442	EHBP1L1,SSSCA1	1.87228
ENSG00000128626	MRPS12	1.87305
ENSG00000160213	CSTB	1.87415
ENSG00000183751	TBL3	1.87419
ENSG00000150093	ITGB1	1.87817
ENSG00000198176	TFDP1	1.8792
ENSG00000136492	BRIP1	1.87957
ENSG00000163170	BOLA3	1.88315
ENSG00000101255	TRIB3	1.88318
ENSG00000168615	ADAM9	1.88336
ENSG00000118094	TREH	1.88399
ENSG00000108604	SMARCD2	1.88496
ENSG00000068724	TTC7A	1.8851
ENSG00000161654	LSM12	1.88512
ENSG00000152558	TMEM123	1.88615
ENSG00000101680	LAMA1	1.88665
ENSG00000269893	SNHG8	1.88673
ENSG00000116685	KIAA2013	1.88734
ENSG00000141556	TBCD	1.88877
ENSG00000100906	NFKBIA	1.89235
ENSG00000107819	SFXN3	1.89251
ENSG00000158792	SPATA2L	1.89437
ENSG00000140577	CRTC3	1.89439
ENSG00000131876	SNRPA1	1.89473
ENSG00000105700	KXD1	1.89502
ENSG00000099203	TMED1	1.89551
ENSG00000176444	CLK2,FAM189B	1.89585
ENSG00000170734	POLH	1.89673
ENSG00000143252	SDHC	1.89741
ENSG00000082497	SERTAD4	1.89754
ENSG00000105583	CTD-2192J16.24,WDR83OS	1.89823
ENSG00000129347	KRI1	1.89933
ENSG00000005022	SLC25A5	1.89934
ENSG00000135587	SMPD2	1.90249
ENSG00000099331	MYO9B	1.90361
ENSG00000142178	SIK1	1.90415
ENSG00000101363	MANBAL	1.90498
ENSG00000178921	PFAS	1.90505
ENSG00000136802	LRRC8A	1.9054
ENSG00000099817	POLR2E	1.90613
ENSG00000035862	TIMP2	1.9073
ENSG00000221912	PDXP	1.90866
ENSG00000067955	CBFB	1.9088
ENSG00000160691	SHC1	1.9096
ENSG00000131233	GJA9,MYCBP	1.91003
ENSG00000167702	KIFC2	1.91007
ENSG00000108270	AATF	1.91118
ENSG00000135372	NAT10	1.91629
ENSG00000126107	HECTD3	1.91724
ENSG00000176619	LMNB2	1.91861
ENSG00000198373	WWP2	1.91985
ENSG00000172009	THOP1	1.92063
ENSG00000118655	DCLRE1B	1.92073
ENSG00000112715	VEGFA	1.92101
ENSG00000136999	NOV	1.92153
ENSG00000087074	PPP1R15A	1.92183
ENSG00000007816	WDR46	1.92208
ENSG00000187860	CCDC157	1.92489
ENSG00000131747	TOP2A	1.92566
ENSG00000167685	ZNF444	1.92566
ENSG00000183077	AFMID	1.9258
ENSG00000161057	PSMC2	1.92586
ENSG00000140044	JDP2	1.92653
ENSG00000167695	FAM57A	1.92715
ENSG00000130299	GTPBP3	1.92731
ENSG00000156504	FAM122B	1.92773
ENSG00000005339	CREBBP	1.9306
ENSG00000145604	SKP2	1.93082
ENSG00000137269	LRRC1	1.93193
ENSG00000109320	NFKB1	1.93216
ENSG00000130304	SLC27A1	1.93306
ENSG00000172081	MOB3A	1.93312
ENSG00000133265	HSPBP1	1.93346
ENSG00000091136	LAMB1	1.93383
ENSG00000123975	CKS2	1.93384
ENSG00000101457	DNTTIP1	1.93394
ENSG00000115307	AUP1	1.93442
ENSG00000092094	OSGEP	1.9346
ENSG00000154640	BTG3	1.93462
ENSG00000178035	IMPDH2,QRICH1	1.93676
ENSG00000168040	FADD	1.93685
ENSG00000138867	GUCD1	1.93762
ENSG00000118640	VAMP8	1.94306
ENSG00000109065	NAT9	1.94383
ENSG00000172889	EGFL7	1.94436
ENSG00000106635	BCL7B	1.9449
ENSG00000069869	NEDD4	1.94508
ENSG00000145901	TNIP1	1.94699
ENSG00000108479	GALK1	1.94868
ENSG00000106330	MOSPD3	1.95016
ENSG00000160072	ATAD3B	1.95018
ENSG00000001036	FUCA2	1.95295
ENSG00000133511	PI4KA	1.9536
ENSG00000197555	SIPA1L1	1.95421
ENSG00000100104	SRRD	1.95446
ENSG00000131504	DIAPH1	1.9546
ENSG00000113916	BCL6	1.95481
ENSG00000162522	KIAA1522	1.955
ENSG00000189306	RRP7B	1.95671
ENSG00000102977	ACD	1.95747
ENSG00000165060	FXN,TJP2	1.95803
ENSG00000144681	STAC	1.95822
ENSG00000125885	MCM8	1.95833
ENSG00000131149	CTC-786C10.1,GSE1	1.95881
ENSG00000135404	CD63	1.96138
ENSG00000117450	PRDX1	1.96224
ENSG00000146535	GNA12	1.96344
ENSG00000109111	SUPT6H	1.96344
ENSG00000107719	PALD1	1.9649
ENSG00000130147	SH3BP4	1.96654
ENSG00000116221	MRPL37	1.96762
ENSG00000121211	MND1	1.9679
ENSG00000171823	FBXL14	1.96807
ENSG00000108773	KAT2A,RAB5C	1.96809
ENSG00000183684	ALYREF	1.9682
ENSG00000106608	URGCP	1.96965
ENSG00000100911	PSME2	1.97189
ENSG00000035499	DEPDC1B	1.97297
ENSG00000196313	POM121	1.97394
ENSG00000101346	POFUT1	1.974
ENSG00000257704	PRR24	1.97497
ENSG00000198477	ZNF280B	1.97603
ENSG00000162433	AK4	1.97737
ENSG00000187951	ARHGAP11A	1.97821
ENSG00000197712	FAM114A1	1.98021
ENSG00000134871	COL4A2	1.98089
ENSG00000154767	XPC	1.98092
ENSG00000176101	SSNA1	1.98125
ENSG00000151748	SAV1	1.98319
ENSG00000071282	LMCD1	1.98401
ENSG00000149532	CPSF7	1.98419
ENSG00000104853	CLPTM1	1.98469
ENSG00000146676	PURB	1.98608
ENSG00000173137	ADCK5	1.98711
ENSG00000184840	TMED9	1.98745
ENSG00000180891	CUEDC1	1.98816
ENSG00000183741	CBX6	1.99099
ENSG00000101412	E2F1	1.99127
ENSG00000138279	ANXA7	1.99231
ENSG00000159202	UBE2Z	1.99354
ENSG00000170312	CDK1	1.99447
ENSG00000111665	CDCA3	1.99614
ENSG00000131188	PRR7	1.99797
ENSG00000124201	ZNFX1	1.99813
ENSG00000221821	C6orf226	1.99821
ENSG00000011028	MRC2	2.00063
ENSG00000173706	HEG1	2.00066
ENSG00000261408	TEN1-CDK3	2.00186
ENSG00000096070	BRPF3	2.00219
ENSG00000130005	AC005329.7,GAMT	2.00305
ENSG00000197063	MAFG,SIRT7	2.00321
ENSG00000150630	VEGFC	2.00331
ENSG00000056291	NPFFR2	2.00374
ENSG00000115275	MOGS	2.00455
ENSG00000162063	CCNF	2.00784
ENSG00000042753	AP2S1	2.00863
ENSG00000108272	DHRS11	2.01042
ENSG00000198824	CHAMP1	2.01387
ENSG00000099624	ATP5D	2.01421
ENSG00000213719	CLIC1	2.01583
ENSG00000108469	RECQL5	2.01627
ENSG00000127774	EMC6	2.01749
ENSG00000153815	CMIP	2.01774
ENSG00000132326	PER2	2.01789
ENSG00000164543	STK17A	2.01857
ENSG00000113810	SMC4	2.02122
ENSG00000215711	DGAT1	2.0224
ENSG00000135124	P2RX4	2.02286
ENSG00000119900	OGFRL1	2.02577
ENSG00000169604	ANTXR1	2.02589
ENSG00000214063	TSPAN4	2.0265
ENSG00000166839	ANKDD1A	2.02691
ENSG00000136715	SAP130	2.02721
ENSG00000076067	RBMS2	2.02759
ENSG00000148396	SEC16A	2.02779
ENSG00000185163	DDX51	2.03202
ENSG00000182197	EXT1	2.03341
ENSG00000135540	NHSL1	2.03631
ENSG00000131724	IL13RA1	2.03766
ENSG00000166897	ELFN2,RP1-63G5.5	2.03798
ENSG00000065268	WDR18	2.03825
ENSG00000172340	SUCLG2	2.03879
ENSG00000099849	RASSF7	2.04099
ENSG00000173457	PPP1R14B	2.04134
ENSG00000176845	METRNL	2.04142
ENSG00000198142	SOWAHC	2.04194
ENSG00000124191	TOX2	2.0423
ENSG00000136807	CDK9,FPGS	2.0444
ENSG00000132467	UTP3	2.04613
ENSG00000204536	CCHCR1	2.04908
ENSG00000067560	RHOA	2.04966
ENSG00000056661	PCGF2	2.0504
ENSG00000182481	KPNA2	2.05049
ENSG00000103187	COTL1	2.0519
ENSG00000131459	GFPT2	2.05365
ENSG00000131389	SLC6A6	2.05496
ENSG00000179262	RAD23A	2.05565
ENSG00000149131	SERPING1	2.05661
ENSG00000145494	NDUFS6	2.05819
ENSG00000103932	RPAP1	2.05875
ENSG00000179632	MAF1	2.06058
ENSG00000212994	RPS26	2.06188
ENSG00000077549	CAPZB	2.06248
ENSG00000078808	SDF4	2.06379
ENSG00000158417	EIF5B	2.06433
ENSG00000138074	SLC5A6	2.0653
ENSG00000115053	NCL	2.06543
ENSG00000084463	WBP11	2.06548
ENSG00000198901	PRC1	2.06578
ENSG00000122863	CHST3	2.06758
ENSG00000129195	FAM64A	2.06831
ENSG00000149636	DSN1	2.06915
ENSG00000158122	AAED1	2.06984
ENSG00000008256	CYTH3	2.07043
ENSG00000104756	KCTD9	2.0705
ENSG00000107816	LZTS2	2.07122
ENSG00000133398	MED10	2.07171
ENSG00000041880	PARP3	2.0723
ENSG00000130827	PLXNA3	2.07295
ENSG00000149115	TNKS1BP1	2.07445
ENSG00000183506	PI4KAP2	2.07483
ENSG00000123989	CHPF	2.07641
ENSG00000172354	GNB2	2.07699
ENSG00000126883	NUP214	2.07706
ENSG00000174996	KLC2	2.07806
ENSG00000171148	TADA3	2.07937
ENSG00000126705	AHDC1	2.08147
ENSG00000137273	FOXF2	2.08159
ENSG00000088832	FKBP1A	2.08224
ENSG00000169242	EFNA1	2.08279
ENSG00000142945	KIF2C	2.08319
ENSG00000187608	ISG15	2.08652
ENSG00000167491	GATAD2A	2.08685
ENSG00000131844	MCCC2	2.08882
ENSG00000070423	RNF126	2.08885
ENSG00000169230	PRELID1	2.08974
ENSG00000101000	PROCR	2.09012
ENSG00000183853	KIRREL	2.09198
ENSG00000162413	KLHL21	2.09334
ENSG00000072518	MARK2	2.09389
ENSG00000151725	MLF1IP	2.09462
ENSG00000096433	ITPR3	2.09708
ENSG00000154945	ANKRD40	2.09918
ENSG00000007080	CCDC124	2.10036
ENSG00000130958	SLC35D2	2.1007
ENSG00000105662	CRTC1	2.10217
ENSG00000117318	ID3	2.10242
ENSG00000164109	MAD2L1	2.10284
ENSG00000170275	CRTAP	2.1029
ENSG00000013563	DNASE1L1	2.10403
ENSG00000113070	HBEGF	2.10516
ENSG00000084207	GSTP1	2.10672
ENSG00000130810	PPAN,PPAN-P2RY11	2.1068
ENSG00000123815	ADCK4,NUMBL	2.10692
ENSG00000176393	RNPEP	2.10772
ENSG00000100038	TOP3B	2.10784
ENSG00000172270	BSG	2.10809
ENSG00000130635	COL5A1	2.10848
ENSG00000115207	GTF3C2,MPV17	2.10961
ENSG00000169241	SLC50A1	2.11011
ENSG00000143321	HDGF	2.11073
ENSG00000170836	PPM1D	2.11143
ENSG00000175279	APITD1,APITD1-CORT,CORT	2.11206
ENSG00000221889	ALKBH6,SYNE4	2.1121
ENSG00000115946	PNO1	2.11269
ENSG00000103381	CPPED1	2.11288
ENSG00000165632	TAF3	2.11428
ENSG00000139514	SLC7A1	2.11505
ENSG00000140332	TLE3	2.11542
ENSG00000072195	SPEG	2.11597
ENSG00000119599	DCAF4,RP11-109N23.6	2.11736
ENSG00000125450	NUP85	2.11838
ENSG00000100304	TTLL12	2.11843
ENSG00000185262	UBALD2	2.12014
ENSG00000164713	BRI3	2.12157
ENSG00000151065	DCP1B	2.12199
ENSG00000164053	ATRIP,TREX1	2.12255
ENSG00000185189	NRBP2,PUF60,SCRIB	2.12353
ENSG00000188229	TUBB4B	2.12509
ENSG00000078237	C12orf5	2.12594
ENSG00000173581	CCDC106,U2AF2,ZNF580,ZNF581	2.12613
ENSG00000180957	PITPNB	2.12617
ENSG00000158062	UBXN11	2.12637
ENSG00000115935	WIPF1	2.12656
ENSG00000183765	CHEK2	2.12659
ENSG00000109736	MFSD10	2.12839
ENSG00000171608	PIK3CD	2.12894
ENSG00000167969	ECI1	2.13055
ENSG00000157240	FZD1	2.13248
ENSG00000070770	CSNK2A2	2.13283
ENSG00000123136	DDX39A	2.13402
ENSG00000079974	RABL2B	2.13495
ENSG00000197299	BLM	2.13522
ENSG00000120942	UBIAD1	2.13569
ENSG0000014040	MAN2C1	2.13572
ENSG00000174567	GOLT1A,KISS1	2.13595
ENSG00000141456	PELP1	2.13703
ENSG00000136444	RSAD1	2.13733
ENSG00000102125	TAZ	2.1374
ENSG00000110046	ATG2A	2.13973
ENSG00000165804	ZNF219	2.14003
ENSG00000132522	GPS2,NEURL4	2.14022
ENSG00000166716	ZNF592	2.14081
ENSG00000177732	SOX12	2.14167
ENSG00000226479	TMEM185B	2.14297
ENSG00000156384	SFR1	2.14313
ENSG00000215440	NPEPL1,STX16,STX16-NPEPL1	2.14486
ENSG00000100401	RANGAP1	2.14488
ENSG00000130175	PRKCSH	2.14608
ENSG00000184674	GSTT1	2.14638
ENSG00000108557	RAI1	2.14658
ENSG00000107731	UNC5B	2.1467
ENSG00000130203	APOE,TOMM40	2.14749
ENSG00000101608	MYL12A,RP13-270P17.2	2.14892
ENSG00000102100	SLC35A2	2.14909
ENSG00000160741	CRTC2,SLC39A1	2.14931
ENSG00000134780	DAGLA	2.14977
ENSG00000165689	SDCCAG3	2.15195
ENSG00000100479	POLE2	2.15259
ENSG00000197451	HNRNPAB	2.15292
ENSG00000110011	DNAJC4,NUDT22	2.15399
ENSG00000132646	PCNA	2.15422
ENSG00000145220	LYAR	2.15536
ENSG00000172725	CORO1B,PTPRCAP	2.15674
ENSG00000165792	METTL17	2.15805
ENSG00000084652	TXLNA	2.15874
ENSG00000117676	RPS6KA1	2.15894
ENSG00000164930	FZD6	2.16007
ENSG00000082781	ITGB5	2.16114
ENSG00000198198	SZT2	2.16282
ENSG00000173812	EIF1	2.16344
ENSG00000184838	CTD-2334D19.1,PRR16	2.16497
ENSG00000079819	EPB41L2	2.17032
ENSG00000060491	OGFR	2.17243
ENSG00000184743	ATL3	2.17499
ENSG00000134222	PSRC1	2.1751
ENSG00000133027	PEMT	2.17545
ENSG00000204160	ZDHHC18	2.17555
ENSG00000064012	CASP8	2.17579
ENSG00000121064	SCPEP1	2.17767
ENSG00000118894	FAM86A	2.17884
ENSG00000164294	GPX8	2.17953
ENSG00000168393	DTYMK	2.18026
ENSG00000153317	ASAP1	2.1808
ENSG00000122687	FTSJ2	2.18115
ENSG00000188735	TMEM120B	2.18207
ENSG00000179526	SHARPIN	2.1832
ENSG00000206346	DOM3Z	2.18443
ENSG00000157326	DHRS4	2.18604
ENSG00000143228	NUF2	2.1863
ENSG00000128309	MPST	2.1885
ENSG00000151014	CCRN4L	2.19079
ENSG00000182685	BRICD5	2.19134
ENSG00000175220	ARHGAP1	2.19163
ENSG00000165507	C10orf10	2.19269
ENSG00000044574	HSPA5	2.19696
ENSG00000143319	ISG20L2	2.19811
ENSG00000112651	MRPL2	2.1997
ENSG00000078401	EDN1	2.20075
ENSG00000130508	PXDN	2.20088
ENSG00000185485	RP11-480A16.1,SDHAP1,U2	2.20236
ENSG00000008441	NFIX	2.20276
ENSG00000197785	ATAD3A	2.2032
ENSG00000177628	GBA	2.20322
ENSG00000065970	FOXJ2	2.20459
ENSG00000160201	U2AF1	2.20723
ENSG00000168487	BMP1	2.20928
ENSG00000111684	LPCAT3	2.2121
ENSG00000100281	HMGXB4	2.21234
ENSG00000101181	GTPBP5	2.21252
ENSG00000166451	CENPN	2.21261
ENSG00000168884	TNIP2	2.21267
ENSG00000185730	ZNF696	2.21338
ENSG00000164104	HMGB2,RP11-798M19.3	2.21348
ENSG00000198837	DENND4B	2.21452
ENSG00000100139	MICALL1	2.21651
ENSG00000141084	RANBP10	2.21694
ENSG00000181830	SLC35C1	2.21834
ENSG00000172731	LRRC20	2.22137
ENSG00000099901	RANBP1	2.22253
ENSG00000211445	GPX3	2.22311
ENSG00000142279	WTIP	2.22592
ENSG00000196975	AC092431.1,ANXA4	2.22597
ENSG00000235034	C19orf81	2.22597
ENSG00000141985	SH3GL1	2.22697
ENSG00000080189	SLC35C2	2.22752
ENSG00000176974	SHMT1	2.22796
ENSG00000100284	TOM1	2.2306
ENSG00000155506	LARP1	2.23074
ENSG00000162623	TYW3	2.23097
ENSG00000105438	KDELR1	2.23141
ENSG00000104852	SNRNP70	2.23636
ENSG00000146918	NCAPG2	2.23673
ENSG00000143418	CERS2	2.23801
ENSG00000214847	LINC00476	2.24027
ENSG00000169223	LMAN2	2.24273
ENSG00000134954	ETS1	2.24353
ENSG00000185475	TMEM179B	2.24595
ENSG00000133065	SLC41A1	2.24664
ENSG00000169733	RFNG	2.24746
ENSG00000142949	PTPRF	2.24747
ENSG00000177051	FBXO46	2.24967
ENSG00000101182	PSMA7	2.25056
ENSG00000146083	RNF44	2.25078
ENSG00000134333	LDHA	2.25181
ENSG00000152104	PTPN14	2.25379
ENSG00000213658	LAT,RP11-264B17.3,SPNS1	2.25665
ENSG00000196371	FUT4,PIWIL4	2.25722
ENSG00000129810	SGOL1	2.25833
ENSG00000172638	EFEMP2	2.25878
ENSG00000077454	LRCH4	2.26145
ENSG00000071462	WBSCR22	2.26175
ENSG00000159055	MIS18A	2.26176
ENSG00000133961	NUMB	2.26177
ENSG00000149658	YTHDF1	2.26186
ENSG00000124224	PPP4R1L	2.26614
ENSG00000125449	ARMC7	2.26659
ENSG00000162385	MAGOH	2.26719
ENSG00000028528	SNX1	2.26827
ENSG00000140988	RPS2	2.26944
ENSG00000008282	SYPL1	2.27357
ENSG00000135424	ITGA7	2.27473
ENSG00000125458	NT5C	2.27629
ENSG00000099995	SF3A1	2.27836
ENSG00000151388	ADAMTS12	2.2786
ENSG00000073169	SELO	2.27896
ENSG00000132603	NIP7	2.28012
ENSG00000171320	ESCO2	2.28081
ENSG00000168005	C11orf84	2.28301
ENSG00000160959	LRRC14	2.28314
ENSG00000071626	DAZAP1	2.28315
ENSG00000060069	CTDP1	2.28371
ENSG00000128567	PODXL	2.28494
ENSG00000101220	C20orf27,SPEF1	2.2852
ENSG00000198053	SIRPA	2.28581
ENSG00000143367	TUFT1	2.28652
ENSG00000171621	SPSB1	2.28882
ENSG00000065717	TLE2	2.28932
ENSG00000132773	TOE1	2.28936
ENSG00000167074	TEF	2.28954
ENSG00000054356	PTPRN	2.28996
ENSG00000109066	TMEM104	2.29051
ENSG00000105397	TYK2	2.2976
ENSG00000127554	GFER	2.29948
ENSG00000162300	ZFPL1	2.30023
ENSG00000106628	POLD2	2.3015
ENSG00000143369	ECM1,TARS2	2.30176
ENSG00000198682	PAPSS2	2.30415
ENSG00000102119	EMD	2.3047
ENSG00000172613	RAD9A	2.30514
ENSG00000126254	RBM42	2.3078
ENSG00000072786	STK10	2.30888
ENSG00000103528	SYT17	2.30919
ENSG00000181938	GINS3	2.31045
ENSG00000080845	DLGAP4	2.31379
ENSG00000123473	STIL	2.3151
ENSG00000099821	POLRMT	2.31553
ENSG00000013364	MVP	2.31696
ENSG00000107815	C10orf2	2.31922
ENSG00000101189	MRGBP	2.32074
ENSG00000068650	ATP11A	2.32131
ENSG00000138795	LEF1	2.32143
ENSG00000213341	CHUK	2.32208
ENSG00000084112	SSH1	2.32303
ENSG00000090621	PABPC4	2.32729
ENSG00000164828	SUN1	2.33018
ENSG00000186567	CEACAM19,PVR	2.33337
ENSG00000213853	EMP2	2.33462
ENSG00000226950	DANCR	2.33545
ENSG00000119408	NEK6	2.33567
ENSG00000158863	FAM160B2	2.33879
ENSG00000135454	B4GALNT1	2.34068
ENSG00000164649	CDCA7L	2.34127
ENSG00000076924	XAB2	2.34181
ENSG00000130522	JUND	2.34242
ENSG00000124225	PMEPA1	2.34254
ENSG00000186350	RXRA	2.34434
ENSG00000138031	ADCY3	2.34726
ENSG00000105321	CCDC9	2.34732
ENSG00000128050	PAICS	2.34872
ENSG00000173272	MZT2A	2.35266
ENSG00000181467	RAP2B	2.35382
ENSG00000198951	NAGA	2.35442
ENSG00000153179	RASSF3	2.35576
ENSG00000020577	SAMD4A	2.35626
ENSG00000112208	BAG2	2.35715
ENSG00000075785	RAB7A	2.35745
ENSG00000063245	EPN1	2.35906
ENSG00000167965	MLST8	2.35912
ENSG00000095319	NUP188,PHYHD1,RP11-101E3.5	2.36048
ENSG00000005100	DHX33	2.36073
ENSG00000131759	RARA	2.36244
ENSG00000170653	ATF7	2.36312
ENSG00000198931	APRT,GALNS	2.36518
ENSG00000179091	CYC1	2.36639
ENSG00000104529	EEF1D,NAPRT1	2.36863
ENSG00000142039	CCDC97	2.37406
ENSG00000198026	ZNF335	2.37529
ENSG00000196396	PTPN1	2.37708
ENSG00000165915	SLC39A13	2.37754
ENSG00000120129	DUSP1	2.37856
ENSG00000128311	TST	2.38036
ENSG00000179943	FIZ1	2.38089
ENSG00000168763	CNNM3,CNNM4	2.38188
ENSG00000072571	HMMR	2.38207
ENSG00000077312	SNRPA	2.38476
ENSG00000134186	PRPF38B	2.38514
ENSG00000165684	SNAPC4	2.39081
ENSG00000075618	FSCN1	2.39141
ENSG00000084774	CAD	2.39367
ENSG00000175215	CTDSP2	2.39499
ENSG00000087586	AURKA	2.3964
ENSG00000242242	PVRL3-AS1,RP11-553A10.1	2.40156
ENSG00000130119	GNL3L	2.4033
ENSG00000090857	PDPR	2.4045
ENSG00000166484	MAPK7	2.40486
ENSG00000178607	ERN1	2.40597
ENSG00000100647	KIAA0247	2.40719
ENSG00000171858	RPS21	2.41224
ENSG00000085514	PILRA,PILRB	2.41408
ENSG00000138092	CENPO	2.41529
ENSG00000183087	GAS6	2.41734
ENSG00000039650	PNKP	2.42026
ENSG00000184897	H1FX	2.42165
ENSG00000134531	EMP1	2.42594
ENSG00000063660	GPC1	2.42669
ENSG00000176953	NFATC2IP	2.42896
ENSG00000139645	ANKRD52	2.4335
ENSG00000131788	PIAS3	2.43575
ENSG00000224877	C17orf89	2.44108
ENSG00000182319	SGK223	2.44382
ENSG00000183495	EP400	2.44611
ENSG00000072062	PRKACA,SAMD1	2.4469
ENSG00000165661	QSOX2	2.449
ENSG00000154370	TRIM11	2.4501
ENSG00000125826	RBCK1	2.4514
ENSG00000198792	TMEM184B	2.45254
ENSG00000156675	RAB11FIP1	2.45441
ENSG00000171298	GAA	2.45521
ENSG00000116962	NID1	2.45681
ENSG00000068028	RASSF1	2.4575
ENSG00000092820	EZR	2.45774
ENSG00000124155	PIGT,SYS1,SYS1-DBNDD2	2.45949
ENSG00000107833	NPM3	2.46233
ENSG00000116478	HDAC1	2.46257
ENSG00000139734	DIAPH3	2.46523
ENSG00000100982	PCIF1	2.46754
ENSG00000125503	PPP1R12C	2.46776
ENSG00000058335	RASGRF1	2.46805
ENSG00000105221	AKT2	2.4698
ENSG00000105755	ETHE1	2.47324
ENSG00000092621	PHGDH	2.4742
ENSG00000111602	TIMELESS	2.47556
ENSG00000167470	MIDN	2.47582
ENSG00000123992	DNPEP	2.47952
ENSG00000163378	EOGT	2.47968
ENSG00000101849	TBL1X	2.48042
ENSG00000007376	RPUSD1	2.48066
ENSG00000104885	DOT1L	2.48123
ENSG00000132382	MYBBP1A	2.48237
ENSG00000128298	BAIAP2L2,SLC16A8	2.48327
ENSG00000090889	KIF4A	2.485
ENSG00000165806	CASP7	2.48509
ENSG00000158050	DUSP2	2.4866
ENSG00000042493	CAPG	2.48831
ENSG00000136213	AC004840.9,CHST12	2.48853
ENSG00000221261	MIR1208,PVT1	2.48885
ENSG00000141552	ANAPC11	2.49088
ENSG00000100439	ABHD4	2.49106
ENSG00000131653	TRAF7	2.49173
ENSG00000221968	FADS3	2.49232
ENSG00000065308	TRAM2	2.49419
ENSG00000030110	BAK1	2.49801
ENSG00000165138	ANKS6	2.50145
ENSG00000107521	HPS1,PYROXD2	2.50272
ENSG00000168003	SLC3A2	2.50415
ENSG00000100029	PES1	2.5048
ENSG00000134057	CCNB1	2.50619
ENSG00000134824	FADS2	2.50623
ENSG00000160972	PPP1R16A	2.50857
ENSG00000175467	SART1	2.50936
ENSG00000160193	WDR4	2.51066
ENSG00000130202	PVRL2	2.51934
ENSG00000149798	CDC42EP2,POLA2	2.52059
ENSG00000255198	SNHG9	2.52185
ENSG00000100726	TELO2	2.52254
ENSG00000104368	PLAT	2.52275
ENSG00000185351	ANKRD11	2.52276
ENSG00000185324	CDK10	2.52802
ENSG00000144591	GMPPA	2.52957
ENSG00000178719	GRINA	2.52998
ENSG00000158555	GDPD5	2.53098
ENSG00000103148	NPRL3	2.53582
ENSG00000175573	C11orf68	2.53731
ENSG00000179051	RCC2	2.53845
ENSG00000099783	HNRNPM	2.53869
ENSG00000181790	BAI1	2.54167
ENSG00000160888	IER2	2.54203
ENSG00000169679	BUB1	2.54222
ENSG00000130479	MAP1S	2.54587
ENSG00000152527	PLEKHH2	2.55135
ENSG00000115380	EFEMP1	2.55255
ENSG00000175550	DRAP1	2.55353
ENSG00000144554	FANCD2	2.55442
ENSG00000130826	DKC1	2.55509
ENSG00000146576	C7orf26,ZDHHC4	2.55706
ENSG00000213347	MXD3,RAB24	2.55745
ENSG00000112576	CCND3	2.55783
ENSG00000111247	RAD51AP1	2.55823
ENSG00000166710	B2M	2.56
ENSG00000133895	MEN1	2.56048
ENSG00000107554	DNMBP	2.56073
ENSG00000176087	SLC35A4	2.56102
ENSG00000119333	WDR34	2.56213
ENSG00000158480	SPATA2	2.5644
ENSG00000175866	BAIAP2	2.56535
ENSG00000168411	RFWD3	2.57224
ENSG00000026036	RTEL1,RTEL1-TNFRSF6B	2.57258
ENSG00000061273	HDAC7	2.57263
ENSG00000161011	SQSTM1	2.57293
ENSG00000166949	SMAD3	2.57314
ENSG00000177606	JUN	2.5748
ENSG00000130695	CEP85	2.57872
ENSG00000174669	SLC29A2	2.58325
ENSG00000013573	DDX11	2.5834
ENSG00000168175	MAPK1IP1L	2.58546
ENSG00000186395	KRT10	2.58947
ENSG00000169607	CKAP2L	2.59097
ENSG00000117308	GALE	2.59621
ENSG00000140365	COMMD4	2.59747
ENSG00000198805	PNP	2.59812
ENSG00000050405	LIMA1	2.59864
ENSG00000105486	LIG1	2.60004
ENSG00000164611	PTTG1	2.60129
ENSG00000122566	HNRNPA2B1	2.60405
ENSG00000225968	ELFN1	2.60439
ENSG00000165304	MELK	2.6098
ENSG00000048162	NOP16	2.61217
ENSG00000175727	MLXIP	2.61265
ENSG00000115325	DOK1	2.61356
ENSG00000167797	CDK2AP2	2.61547
ENSG00000126247	CAPNS1	2.61564
ENSG00000072135	PTPN18	2.61609
ENSG00000182173	TSEN54	2.61656
ENSG00000165458	INPPL1	2.61901
ENSG00000103145	HCFC1R1	2.62082
ENSG00000071564	TCF3	2.62214
ENSG00000126215	XRCC3	2.62695
ENSG00000171793	CTPS1	2.6272
ENSG00000117640	MTFR1L	2.62735
ENSG00000162062	C16orf59	2.62879
ENSG00000166340	TPP1	2.62989
ENSG00000052749	RRP12	2.62995
ENSG00000205250	E2F4,ELMO3	2.63098
ENSG00000149476	DAK	2.63243
ENSG00000108106	UBE2S	2.6405
ENSG00000161016	RPL8	2.64196
ENSG00000119986	AVPI1	2.64225
ENSG00000112578	BYSL	2.64261
ENSG00000100292	HMOX1	2.64507
ENSG00000171302	CANT1	2.64622
ENSG00000114767	RRP9	2.65091
ENSG00000158545	ZC3H18	2.65183
ENSG00000079308	TNS1	2.65276
ENSG00000170345	FOS	2.6536
ENSG00000073111	MCM2	2.65946
ENSG00000078061	ARAF	2.66107
ENSG00000123064	DDX54	2.66256
ENSG00000138772	ANXA3	2.66693
ENSG00000105771	SMG9	2.66776
ENSG00000126787	DLGAP5	2.67025
ENSG00000149503	INCENP	2.67076
ENSG00000181222	POLR2A	2.67755
ENSG00000182446	NPLOC4	2.67901
ENSG00000136068	FLNB	2.67941
ENSG00000176222	RP11-15A1.3,ZNF404	2.67964
ENSG00000177096	FAM109B	2.68152
ENSG00000165271	NOL6	2.68189
ENSG00000197956	S100A6	2.68231
ENSG00000085415	SEH1L	2.68306
ENSG00000170049	KCNAB3,TRAPPC1	2.68307
ENSG00000147065	MSN	2.68344
ENSG00000157456	CCNB2,RP11-59H7.3	2.6862
ENSG00000158805	ZNF276	2.68876
ENSG00000118508	RAB32	2.69121
ENSG00000026559	KCNG1	2.69283
ENSG00000133226	SRRM1	2.69626
ENSG00000171552	BCL2L1	2.69923
ENSG00000204531	POU5F1	2.69983
ENSG00000197858	GPAA1	2.70088
ENSG00000001497	LAS1L	2.70361
ENSG00000177700	POLR2L	2.70641
ENSG00000129250	KIF1C	2.70796
ENSG00000108679	LGALS3BP	2.71006
ENSG00000130707	ASS1	2.71099
ENSG00000119326	CTNNAL1	2.71127
ENSG00000120549	KIAA1217	2.71184
ENSG00000140497	SCAMP2	2.71228
ENSG00000110660	SLC35F2	2.71526
ENSG00000076706	MCAM	2.71673
ENSG00000123095	BHLHE41	2.71837
ENSG00000072778	ACADVL	2.71937
ENSG00000275832	ARHGAP23	2.72331
ENSG00000136982	DSCC1	2.72537
ENSG00000168090	COPS6	2.72842
ENSG00000121039	RDH10	2.72939
ENSG00000184967	NOC4L	2.73009
ENSG00000197989	SNHG12	2.73213
ENSG00000166801	FAM111A,GLYATL1,GLYATL1P4	2.73283
ENSG00000100522	GNPNAT1	2.73313
ENSG00000167881	SRP68	2.73606
ENSG00000198832	SELM	2.73747
ENSG00000101294	HM13	2.74297
ENSG00000101199	ARFGAP1	2.74385
ENSG00000164880	INTS1	2.7454
ENSG00000177697	CD151	2.7467
ENSG00000174851	YIF1A	2.74718
ENSG00000144136	SLC20A1	2.74853
ENSG00000156802	ATAD2	2.7489
ENSG00000173894	CBX2	2.74981
ENSG00000128310	GALR3,GCAT	2.75258
ENSG00000223705	NSUN5P1,STAG3L1,TRIM73	2.75377
ENSG00000126746	ZNF384	2.77083
ENSG00000104859	CLASRP	2.77158
ENSG00000147454	SLC25A37	2.77204
ENSG00000129007	CALML4,CLN6	2.77369
ENSG00000083444	PLOD1	2.77398
ENSG00000122140	MRPS2	2.7747
ENSG00000173209	AHSA2	2.77648
ENSG00000103269	RHBDL1,RHOT2	2.77652
ENSG00000160813	PPP1R35	2.77656
ENSG00000037474	NSUN2	2.7777
ENSG00000173039	RELA	2.7831
ENSG00000146834	MEPCE	2.7832
ENSG00000141349	G6PC3	2.78407
ENSG00000153574	RPIA	2.78905
ENSG00000137877	SPTBN5	2.7895
ENSG00000187144	SPATA21	2.79015
ENSG00000100504	PYGL	2.79042
ENSG00000140525	FANCI	2.79401
ENSG00000163513	TGFBR2	2.79458
ENSG00000143537	ADAM15	2.79816
ENSG00000131462	TUBG1	2.80393
ENSG00000039523	FAM65A	2.80477
ENSG00000160818	GPATCH4	2.80884
ENSG00000164111	ANXA5	2.81076
ENSG00000169756	LIMS1	2.81121
ENSG00000158711	ELK4,SLC45A3	2.8126
ENSG00000002834	LASP1	2.81463
ENSG00000070010	UFD1L	2.81485
ENSG00000064961	HMG20B	2.81708
ENSG00000159335	PTMS	2.81792
ENSG00000106009	BRAT1	2.81899
ENSG00000196411	EPHB4	2.81926
ENSG00000049656	CLPTM1L	2.81962
ENSG00000105193	RPS16	2.82079
ENSG00000091651	ORC6	2.82133
ENSG00000185236	RAB11B	2.82352
ENSG00000161326	DUSP14	2.82974
ENSG00000178531	CTXN1	2.83487
ENSG00000067066	SP100	2.83517
ENSG00000136238	RAC1	2.83562
ENSG00000080986	NDC80	2.84136
ENSG00000134109	EDEM1	2.84293
ENSG00000162909	CAPN2	2.84797
ENSG00000187961	KLHL17	2.85197
ENSG00000106268	NUDT1	2.85418
ENSG00000177731	FLII	2.85444
ENSG00000169710	FASN	2.85706
ENSG00000204843	DCTN1,RP11-287D1.3	2.86341
ENSG00000188807	TMEM201	2.86462
ENSG00000104973	MED25	2.86731
ENSG00000103200	NME4,TMEM8A	2.86797
ENSG00000102878	HSF4,NOL3	2.8683
ENSG00000122515	ZMIZ2	2.86842
ENSG00000136997	MYC	2.86973
ENSG00000111012	CYP27B1,METTL1	2.87074
ENSG00000074800	ENO1	2.8716
ENSG00000164917	AP5Z1	2.87193
ENSG00000159176	CSRP1	2.87424
ENSG00000087191	PSMC5	2.87749
ENSG00000115268	RPS15	2.87925
ENSG00000064601	CTSA	2.87935
ENSG00000143819	EPHX1	2.88053
ENSG00000103876	FAH	2.88148
ENSG00000109062	SLC9A3R1	2.88348
ENSG00000130821	SLC6A8	2.8843
ENSG00000166886	NAB2	2.88617
ENSG00000182934	SRPR	2.88667
ENSG00000183696	UPP1	2.88676
ENSG00000079313	REXO1	2.8878
ENSG00000005075	POLR2J	2.88799
ENSG00000185298	CCDC137	2.88916
ENSG00000198355	PIM3	2.89188
ENSG00000156860	FBRS	2.89251
ENSG00000106263	EIF3B	2.89478
ENSG00000175602	CCDC85B	2.89666
ENSG00000123374	CDK2	2.89671
ENSG00000071539	TRIP13	2.90127
ENSG00000126391	FRMD8	2.90786
ENSG00000206427	PRRC2A	2.91036
ENSG00000124228	DDX27	2.91684
ENSG00000137818	RPLP1	2.92085
ENSG00000111799	COL12A1	2.92236
ENSG00000101224	CDC25B	2.92415
ENSG00000186166	CCDC84	2.92544
ENSG00000105202	FBL	2.9262
ENSG00000149257	SERPINH1	2.92915
ENSG00000197136	PCNXL3	2.92992
ENSG00000168066	SF1	2.93099
ENSG00000132507	EIF5A	2.93342
ENSG00000112118	MCM3	2.93481
ENSG00000054967	RELT	2.93507
ENSG00000204381	LAYN	2.93927
ENSG00000070814	TCOF1	2.9427
ENSG00000125755	SYMPK	2.9431
ENSG00000104936	DMPK	2.94317
ENSG00000105270	CLIP3	2.94329
ENSG00000162298	SYVN1	2.95575
ENSG00000141756	FKBP10	2.95823
ENSG00000146830	GIGYF1	2.96135
ENSG00000175334	BANF1	2.97348
ENSG00000140931	CMTM3	2.97989
ENSG00000004399	PLXND1	2.98132
ENSG00000096746	HNRNPH3	2.98203
ENSG00000174021	GNG5	2.99866
ENSG00000131981	LGALS3	3.00427
ENSG00000149948	HMGA2	3.00686
ENSG00000198369	SPRED2	3.00844
ENSG00000130706	ADRM1	3.00874
ENSG00000120254	MTHFD1L	3.01105
ENSG00000172660	TAF15	3.01425
ENSG00000166173	LARP6	3.02067
ENSG00000142173	COL6A2	3.02152
ENSG00000138363	ATIC	3.02182
ENSG00000166889	PATL1	3.02248
ENSG00000132361	CLUH	3.02654
ENSG00000168078	PBK	3.03043
ENSG00000006062	MAP3K14	3.0315
ENSG00000104522	TSTA3	3.0361
ENSG00000119729	RHOQ	3.0366
ENSG00000090061	CCNK	3.03757
ENSG00000182199	SHMT2	3.04203
ENSG00000165886	UBTD1	3.04277
ENSG00000166813	KIF7	3.05491
ENSG00000169908	TM4SF1	3.05916
ENSG00000117298	ECE1	3.06235
ENSG00000184886	PIGW	3.06429
ENSG00000111641	NOP2	3.06813
ENSG00000188566	NDOR1	3.07009
ENSG00000130766	SESN2	3.07055
ENSG00000103202	DECR2,NME4	3.07087
ENSG00000139278	GLIPR1	3.07414
ENSG00000168765	GSTM4	3.07537
ENSG00000116096	SPR	3.08029
ENSG00000101447	FAM83D	3.08154
ENSG00000084636	COL16A1	3.08275
ENSG00000106290	TAF6	3.08612
ENSG00000139926	FRMD6	3.09156
ENSG00000100300	TSPO	3.09463
ENSG00000148841	ITPRIP	3.09584
ENSG00000197283	SYNGAP1	3.09989
ENSG00000100714	MTHFD1	3.10016
ENSG00000088325	TPX2	3.1064
ENSG00000159388	BTG2	3.10746
ENSG00000100297	MCM5	3.1113
ENSG00000173846	PLK3	3.11314
ENSG00000087253	LPCAT2,MMP2	3.11538
ENSG00000197324	LRP10	3.1168
ENSG00000090013	BLVRB	3.11757
ENSG00000013583	HEBP1	3.1179
ENSG00000125505	MBOAT7	3.11876
ENSG00000141994	DUS3L	3.13705
ENSG00000183010	PYCR1	3.14024
ENSG00000148773	MKI67	3.14101
ENSG00000169992	NLGN2	3.14152
ENSG00000141101	NOB1	3.14161
ENSG00000132510	KDM6B	3.14392
ENSG00000138180	CEP55	3.14671
ENSG00000169718	DUS1L	3.15643
ENSG00000105364	MRPL4	3.15883
ENSG00000186834	HEXIM1	3.17001
ENSG00000087088	BAX	3.17037
ENSG00000185122	HSF1	3.1779
ENSG00000104419	NDRG1	3.18148
ENSG00000125912	NCLN	3.18587
ENSG00000025772	TOMM34	3.18624
ENSG00000064666	CNN2	3.18631
ENSG00000126903	SLC10A3	3.18645
ENSG00000205212	CCDC144NL	3.18686
ENSG00000131669	NINJ1	3.19197
ENSG00000197582	GPX1	3.19762
ENSG00000104897	SF3A2	3.20847
ENSG00000185043	CIB1	3.2097
ENSG00000071894	CPSF1,SLC39A4	3.21566
ENSG00000161638	ITGA5	3.21882
ENSG00000188157	AGRN	3.21896
ENSG00000169136	ATF5	3.21998
ENSG00000149577	SIDT2,TAGLN	3.22073
ENSG00000105971	CAV2	3.22151
ENSG00000117122	MFAP2	3.22243
ENSG00000119673	ACOT2,ACOT4	3.22532
ENSG00000108179	PPIF	3.2299
ENSG00000103512	NOMO2	3.23453
ENSG00000165501	LRR1	3.23641
ENSG00000179833	SERTAD2	3.23919
ENSG00000111252	SH2B3	3.24153
ENSG00000105355	PLIN3	3.24181
ENSG00000034063	UHRF1	3.24651
ENSG00000120885	CLU	3.24748
ENSG00000168056	LTBP3	3.24949
ENSG00000072310	SREBF1	3.24985
ENSG00000182704	TSKU	3.25335
ENSG00000166508	MCM7	3.25379
ENSG00000100065	CARD10,MFNG	3.25691
ENSG00000132481	TRIM47	3.25901
ENSG00000115884	SDC1	3.26333
ENSG00000222013	SCAMP4	3.27634
ENSG00000147394	ZNF185	3.28038
ENSG00000174307	PHLDA3	3.28355
ENSG00000130402	ACTN4	3.29053
ENSG00000112787	FBRSL1	3.29976
ENSG00000114738	MAPKAPK3	3.30138
ENSG00000105974	CAV1	3.30868
ENSG00000183048	SLC25A10	3.3118
ENSG00000198720	ANKRD13B	3.31412
ENSG00000120889	TNFRSF10B	3.31614
ENSG00000214160	ALG3	3.32778
ENSG00000079432	CIC	3.32844
ENSG00000161179	YDJC	3.33396
ENSG00000142798	HSPG2	3.33813
ENSG00000164086	DUSP7	3.33934
ENSG00000115282	TTC31	3.34154
ENSG00000100258	LMF2	3.35041
ENSG00000112759	SLC29A1	3.35404
ENSG00000185624	P4HB	3.36189
ENSG00000117385	LEPRE1	3.36453
ENSG00000100196	KDELR3	3.36466
ENSG00000169919	GUSB	3.36557
ENSG00000128591	FLNC	3.3743
ENSG00000125454	SLC25A19	3.37531
ENSG00000013306	SLC25A39	3.37586
ENSG00000109861	CTSC	3.37681
ENSG00000170779	CDCA4	3.37833
ENSG00000159399	HK2	3.38006
ENSG00000168938	PPIC	3.38295
ENSG00000030582	GRN	3.39159
ENSG00000140406	MESDC1	3.39606
ENSG00000112977	DAP	3.39669
ENSG00000103005	USB1	3.39846
ENSG00000126461	SCAF1	3.40155
ENSG00000123485	HJURP	3.40478
ENSG00000100350	FOXRED2	3.42429
ENSG00000160877	NACC1	3.43532
ENSG00000179134	SAMD4B	3.43696
ENSG00000088247	KHSRP	3.43999
ENSG00000183386	FHL3	3.44474
ENSG00000169564	PCBP1	3.44668
ENSG00000125844	RRBP1	3.44674
ENSG00000143545	RAB13	3.45171
ENSG00000137310	TCF19	3.45586
ENSG00000171067	C11orf24	3.45885
ENSG00000172269	DPAGT1	3.46589
ENSG00000114656	KIAA1257,RP11-723O4.6	3.48246
ENSG00000141086	CTRL,PSMB10,SLC12A4	3.49015
ENSG00000167779	IGFBP6	3.49152
ENSG00000138668	HNRNPD	3.50798
ENSG00000197903	HIST1H2BK	3.51521
ENSG00000105472	CLEC11A	3.51654
ENSG00000136295	TTYH3	3.52305
ENSG00000170727	BOP1	3.52972
ENSG00000026508	CD44	3.53286
ENSG00000152253	SPC25	3.5415
ENSG00000131652	THOC6	3.54219
ENSG00000158195	WASF2	3.54295
ENSG00000119403	PHF19	3.54439
ENSG00000206481	MDC1	3.55477
ENSG00000113504	SLC12A7	3.5562
ENSG00000134690	CDCA8	3.56002
ENSG00000165891	E2F7	3.5616
ENSG00000100345	MYH9	3.5625
ENSG00000122952	ZWINT	3.56302
ENSG00000065911	MTHFD2	3.58068
ENSG00000104825	NFKBIB	3.58324
ENSG00000065328	MCM10	3.58759
ENSG00000170638	TRABD	3.58768
ENSG00000105173	CCNE1	3.58971
ENSG00000167962	ZNF598	3.5986
ENSG00000100526	CDKN3	3.60493
ENSG00000121900	TMEM54	3.61186
ENSG00000125968	ID1	3.61371
ENSG00000172534	HCFC1	3.62653
ENSG00000178999	AURKB	3.63024
ENSG00000111145	ELK3	3.6471
ENSG00000167747	C19orf48	3.65808
ENSG00000066322	ELOVL1	3.66541
ENSG00000125753	VASP	3.67007
ENSG00000010278	CD9	3.69072
ENSG00000134574	DDB2	3.69286
ENSG00000150457	LATS2	3.69308
ENSG00000169188	APEX2	3.70236
ENSG00000094804	CDC6	3.70753
ENSG00000181019	NQO1	3.70778
ENSG00000067225	PKM	3.71919
ENSG00000013810	TACC3	3.72222
ENSG00000213445	SIPA1	3.72292
ENSG00000068323	TFE3	3.7245
ENSG00000143368	SF3B4	3.72515
ENSG00000125534	PPDPF	3.75857
ENSG00000108518	PFN1	3.76183
ENSG00000162302	RPS6KA4	3.768
ENSG00000167978	SRRM2	3.77544
ENSG00000187840	EIF4EBP1	3.77859
ENSG00000143320	CRABP2	3.78709
ENSG00000089280	FUS	3.79292
ENSG00000142634	EFHD2	3.79467
ENSG00000173207	CKS1B	3.80633
ENSG00000100162	CENPM	3.82086
ENSG00000067182	TNFRSF1A	3.82328
ENSG00000204197	KIFC1	3.83583
ENSG00000119655	NPC2	3.85433
ENSG00000160410	SHKBP1	3.86902
ENSG00000103168	TAF1C	3.88297
ENSG00000149262	INTS4	3.88506
ENSG00000106266	SNX8	3.88947
ENSG00000101160	CTSZ	3.9063
ENSG00000183963	SMTN	3.91518
ENSG00000204673	AKT1S1	3.91696
ENSG00000108639	SYNGR2	3.96222
ENSG00000108107	RPL28	3.97273
ENSG00000140545	MFGE8	3.98967
ENSG00000135046	ANXA1	3.99048
ENSG00000160789	LMNA	4.01256
ENSG00000089685	BIRC5	4.03354
ENSG00000089159	PXN	4.03419
ENSG00000175063	UBE2C	4.03752
ENSG00000181026	AEN,MIR1179	4.03885
ENSG00000171848	RRM2	4.0395
ENSG00000070404	FSTL3	4.06105
ENSG00000105048	TNNT1	4.06771
ENSG00000185022	MAFF	4.07441
ENSG00000110492	MDK	4.07867
ENSG00000128228	SDF2L1	4.08291
ENSG00000103257	SLC7A5	4.08603
ENSG00000103326	SOLH	4.09292
ENSG00000218018	RBM38	4.10579
ENSG00000129038	LOXL1	4.10672
ENSG00000125733	TRIP10	4.10886
ENSG00000106624	AEBP1	4.12991
ENSG00000196576	PLXNB2	4.13092
ENSG00000106333	PCOLCE	4.13178
ENSG00000204525	HLA-C	4.14777
ENSG00000141522	ARHGDIA	4.1518
ENSG00000160211	G6PD	4.15861
ENSG00000185650	ZFP36L1	4.16898
ENSG00000088038	CNOT3	4.1926
ENSG00000141161	UNC45B	4.20791
ENSG00000109113	RAB34	4.21396
ENSG00000184216	IRAK1	4.21697
ENSG00000116717	GADD45A	4.22229
ENSG00000146670	CDCA5	4.23527
ENSG00000134363	FST	4.2362
ENSG00000011304	PTBP1	4.23639
ENSG00000110104	CCDC86	4.23884
ENSG00000175505	AP003419.11,CLCF1,POLD4	4.24445
ENSG00000167615	LENG8	4.24594
ENSG00000196924	FLNA	4.25407
ENSG00000175832	ETV4	4.26041
ENSG00000109846	CRYAB	4.26961
ENSG00000128294	TPST2	4.2909
ENSG00000028116	VRK2	4.30107
ENSG00000139211	AMIGO2	4.30822
ENSG00000197019	SERTAD1	4.30955
ENSG00000160932	LY6E	4.31275
ENSG00000132199	ENOSF1	4.31879
ENSG00000137331	IER3	4.34053
ENSG00000168488	ATXN2L	4.34147
ENSG00000168077	SCARA3	4.34985
ENSG00000162669	HFM1	4.36028
ENSG00000116649	SRM	4.37179
ENSG00000106397	PLOD3	4.38
ENSG00000197114	ZGPAT	4.38592
ENSG00000131435	PDLIM4	4.43141
ENSG00000117399	CDC20	4.45657
ENSG00000137801	THBS1	4.47385
ENSG00000183059	ANXA2	4.48099
ENSG00000137309	HMGA1	4.48256
ENSG00000159840	ZYX	4.49722
ENSG00000133195	SLC39A11	4.51273
ENSG00000196878	LAMB3	4.51949
ENSG00000197747	S100A10	4.53006
ENSG00000204525	HLA-B	4.55335
ENSG00000136938	ANP32B	4.56428
ENSG00000118523	CTGF	4.56866
ENSG00000142089	IFITM3	4.57312
ENSG00000158710	TAGLN2	4.60854
ENSG00000225880	LINC00115,RP11-206L10.10,RP11-206L10.2,RP11-206L10.8,RP5-857K21.4	4.60879
ENSG00000172572	PDE3A	4.62291
ENSG00000196498	NCOR2	4.65912
ENSG00000005884	ITGA3	4.67143
ENSG00000108821	COL1A1	4.67581
ENSG00000011426	ANLN	4.69444
ENSG00000188643	S100A16	4.74408
ENSG00000184470	TXNRD2	4.75529
ENSG00000137571	SLCO5A1	4.7867
ENSG00000198517	MAFK	4.79277
ENSG00000128564	VGF	4.80748
ENSG00000196923	PDLIM7	4.81525
ENSG00000197879	MYO1C	4.93255
ENSG00000160957	RECQL4	4.95269
ENSG00000222041	LINC00152	4.981
ENSG00000167601	AXL	5.00647
ENSG00000072110	ACTN1	5.03923
ENSG00000106211	HSPB1	5.16168
ENSG00000034152	MAP2K3	5.20564
ENSG00000100097	LGALS1	5.33179
ENSG00000187244	BCAM	5.34153
ENSG00000111057	KRT18	5.40089
ENSG00000131094	C1QL1	5.51279
ENSG00000167900	TK1	5.59979
ENSG00000176890	TYMS	5.62255
ENSG00000111206	FOXM1	5.68997
ENSG00000177469	PTRF	5.74235
ENSG00000101057	MYBL2	5.74313
ENSG00000105281	SLC1A5	5.74507
ENSG00000006327	TNFRSF12A	6.19113
ENSG00000125148	MT2A	6.60568
ENSG00000100867	DHRS2	7.20891

## Sheet: 10 weeks PC
Asymmetrically expressed genes in the spinal cord at 10 weeks PC
ensembl_gene_id	gene	log2(fold_change)
ENSG00000006468	ETV1	2.73874
ENSG00000026559	KCNG1	1.86152
ENSG00000049247	UTS2	1.54425
ENSG00000080854	IGSF9B	-1.62857
ENSG00000106571	GLI3	1.56858
ENSG00000107242	PIP5K1B	1.67446
ENSG00000112319	EYA4	2.15884
ENSG00000113396	CTC-573M9.1,SLC27A6	-1.54955
ENSG00000128573	FOXP2	2.281
ENSG00000128805	ARHGAP22	-1.69849
ENSG00000131096	PYY	-2.68515
ENSG00000135250	SRPK2	1.76617
ENSG00000137878	POLR2M	-2.28219
ENSG00000140548	ZNF710	-1.69782
ENSG00000152990	GPR125	-2.70218
ENSG00000163378	EOGT	-1.67959
ENSG00000165632	TAF3	-1.63317
ENSG00000173272	MZT2A	1.92551
ENSG00000176658	MYO1D	-1.83651
ENSG00000185684	EP400NL	-3.00572
ENSG00000186496	ZNF396	-2.71129
ENSG00000224812	TMEM72-AS1	-2.06315
ENSG00000227354	RBM26-AS1	-2.0435
ENSG00000235903	CPB2-AS1	-1.63158

## Sheet: 12 weeks PC
Asymmetrically expressed genes in the spinal cord at 12 weeks PC
ensembl_gene_id	gene	log2(fold_change)
ENSG00000010379	SLC6A13	2.25838
ENSG00000176658	MYO1D	2.0984
ENSG00000197134	ZNF257	1.54048
ENSG00000169562	GJB1	1.64399
