# Supplementary material for: Epigenetic regulation of lateralized fetal spinal gene expression underlies hemispheric asymmetries
Source: eLife. 2017 Feb 1;6:e22784. doi: 10.7554/eLife.22784 (PMC5295814; doi:10.7554/eLife.22784)
Supplement: Figure 2—source data 1. — DOI: http://dx.doi.org/10.7554/eLife.22784.005 [file elife-22784-fig2-data1.xlsx]

## Sheet: 8 weeks PC left
GO categories enriched in the left spinal cord at 8 weeks PC (39 genes)
sub-root	category name	GO ID	C	O	E	R	rawP	adjP
molecular function	platelet-derived growth factor binding	GO:0048407	11	2	0.02	84.21	0.0002	0.0146
cellular component	fibrillar collagen	GO:0005583	13	2	0.03	79.5	0.0003	0.021
cellular component	collagen	GO:0005581	89	3	0.17	17.42	0.0007	0.0245
C= number of reference genes in the category
O= number of genes in the gene set and also in the category
E = expected number in the category
R = Ratio of enrichment
rawP = p value from hypergeometric test
adjP = p value adjusted by the multiple test adjustment

## Sheet: 8 weeks PC right
GO categories enriched in the right spinal cord at 8 weeks PC (1,651 genes)
sub-root	category name	GO ID	C	O	E	R	rawP	adjP
biological process	cell cycle	GO:0007049	1393	251	132.54	1.89	2.06e-25	8.06e-22
biological process	mitotic cell cycle	GO:0000278	780	166	74.21	2.24	2.02e-24	3.95e-21
biological process	cell cycle process	GO:0022402	1062	202	101.05	2	3.15e-23	4.11e-20
biological process	cell cycle phase	GO:0022403	860	174	81.83	2.13	5.27e-23	5.16e-20
biological process	cellular metabolic process	GO:0044237	8612	977	819.41	1.19	2.89e-20	2.26e-17
biological process	cellular macromolecule metabolic process	GO:0044260	6670	793	634.63	1.25	2.49e-19	1.62e-16
biological process	regulation of cell cycle	GO:0051726	734	146	69.84	2.09	1.2e-18	6.71e-16
biological process	cellular component organization or biogenesis at cellular level	GO:0071841	3420	457	325.4	1.4	1.71e-17	8.37e-15
biological process	M phase of mitotic cell cycle	GO:0000087	379	91	36.06	2.52	3.72e-17	1.62e-14
biological process	organelle organization	GO:0006996	2113	311	201.05	1.55	5.05e-17	1.98e-14
biological process	M phase	GO:0000279	539	114	51.28	2.22	9.59e-17	3.41e-14
biological process	mitosis	GO:0007067	368	88	35.01	2.51	1.65e-16	4.7e-14
biological process	primary metabolic process	GO:0044238	8719	970	829.59	1.17	1.68e-16	4.7e-14
biological process	nuclear division	GO:0000280	368	88	35.01	2.51	1.65e-16	4.7e-14
biological process	organic substance metabolic process	GO:0071704	9024	997	858.61	1.16	1.98e-16	5.17e-14
biological process	cellular response to stress	GO:0033554	1193	199	113.51	1.75	3.2e-16	7.83e-14
biological process	DNA metabolic process	GO:0006259	870	157	82.78	1.9	6.57e-16	1.51e-13
biological process	cellular component organization or biogenesis	GO:0071840	4222	532	401.71	1.32	1.61e-15	3.5e-13
biological process	single-organism metabolic process	GO:0044710	9232	1010	878.4	1.15	2.97e-15	6.12e-13
biological process	organelle fission	GO:0048285	392	89	37.3	2.39	3.24e-15	6.34e-13
biological process	metabolic process	GO:0008152	9488	1032	902.75	1.14	4.09e-15	7.62e-13
biological process	cellular nitrogen compound metabolic process	GO:0034641	5620	669	534.73	1.25	8.77e-15	1.56e-12
biological process	macromolecule metabolic process	GO:0043170	7332	832	697.62	1.19	1.91e-14	3.25e-12
biological process	nitrogen compound metabolic process	GO:0006807	5981	701	569.07	1.23	3.84e-14	6.26e-12
biological process	regulation of cell cycle process	GO:0010564	430	92	40.91	2.25	4.98e-14	7.8e-12
biological process	DNA replication	GO:0006260	274	68	26.07	2.61	7.28e-14	1.1e-11
biological process	nucleobase-containing compound metabolic process	GO:0006139	5232	625	497.81	1.26	1e-13	1.45e-11
biological process	cellular aromatic compound metabolic process	GO:0006725	5395	641	513.32	1.25	1.08e-13	1.51e-11
biological process	heterocycle metabolic process	GO:0046483	5385	639	512.37	1.25	1.66e-13	2.24e-11
biological process	cellular component organization at cellular level	GO:0071842	3317	427	315.6	1.35	2.36e-13	3.08e-11
biological process	cell division	GO:0051301	465	95	44.24	2.15	3.56e-13	4.5e-11
biological process	negative regulation of cell cycle	GO:0045786	455	92	43.29	2.13	1.59e-12	1.95e-10
biological process	organic cyclic compound metabolic process	GO:1901360	5574	652	530.35	1.23	1.73e-12	2.05e-10
biological process	RNA processing	GO:0006396	655	118	62.32	1.89	4.08e-12	4.7e-10
biological process	cellular component organization	GO:0016043	4105	502	390.58	1.29	5.01e-12	5.6e-10
biological process	chromosome segregation	GO:0007059	146	43	13.89	3.1	7.37e-12	7.87e-10
biological process	interphase	GO:0051325	410	84	39.01	2.15	7.44e-12	7.87e-10
biological process	response to DNA damage stimulus	GO:0006974	608	111	57.85	1.92	7.81e-12	8.05e-10
biological process	nucleic acid metabolic process	GO:0090304	4462	537	424.55	1.26	8.72e-12	8.75e-10
biological process	regulation of cell cycle arrest	GO:0071156	269	63	25.59	2.46	9.4e-12	9.2e-10
molecular function	protein binding	GO:0005515	7337	855	667.26	1.28	2.11e-26	1.73e-23
molecular function	binding	GO:0005488	11955	1178	1087.24	1.08	8.86e-11	3.63e-08
molecular function	laminin binding	GO:0043236	21	11	1.91	5.76	5.06e-07	0.0001
molecular function	nucleotide binding	GO:0000166	2436	284	221.54	1.28	1.87e-06	0.0003
molecular function	transferase activity	GO:0016740	1756	215	159.7	1.35	1.62e-06	0.0003
molecular function	nucleoside phosphate binding	GO:1901265	2437	284	221.63	1.28	1.94e-06	0.0003
molecular function	protein binding transcription factor activity	GO:0000988	497	77	45.2	1.7	2.18e-06	0.0003
molecular function	protein kinase binding	GO:0019901	361	59	32.83	1.8	6.44e-06	0.0004
molecular function	transcription factor binding transcription factor activity	GO:0000989	481	74	43.74	1.69	4.45e-06	0.0004
molecular function	small molecule binding	GO:0036094	2630	301	239.18	1.26	4.26e-06	0.0004
molecular function	enzyme binding	GO:0019899	1086	141	98.77	1.43	6.67e-06	0.0004
molecular function	transcription cofactor activity	GO:0003712	466	72	42.38	1.7	5.13e-06	0.0004
molecular function	transferase activity, transferring phosphorus-containing groups	GO:0016772	909	122	82.67	1.48	6.02e-06	0.0004
molecular function	kinase binding	GO:0019900	399	63	36.29	1.74	9.88e-06	0.0005
molecular function	catalytic activity	GO:0003824	5371	562	488.46	1.15	9.93e-06	0.0005
molecular function	protein domain specific binding	GO:0019904	541	80	49.2	1.63	8.45e-06	0.0005
molecular function	identical protein binding	GO:0042802	863	116	78.49	1.48	9.6e-06	0.0005
molecular function	extracellular matrix binding	GO:0050840	37	13	3.36	3.86	1.22e-05	0.0006
molecular function	kinase activity	GO:0016301	781	105	71.03	1.48	2.55e-05	0.0011
molecular function	protein serine/threonine kinase activity	GO:0004674	432	64	39.29	1.63	6.29e-05	0.0024
molecular function	transcription corepressor activity	GO:0003714	186	34	16.92	2.01	6.17e-05	0.0024
molecular function	RNA binding	GO:0003723	854	111	77.67	1.43	6.37e-05	0.0024
molecular function	phosphotransferase activity, alcohol group as acceptor	GO:0016773	724	96	65.84	1.46	9.57e-05	0.003
molecular function	protein kinase activity	GO:0004672	607	83	55.2	1.5	0.0001	0.003
molecular function	adenyl ribonucleotide binding	GO:0032559	1512	178	137.51	1.29	0.0001	0.003
molecular function	ATP binding	GO:0005524	1482	175	134.78	1.3	0.0001	0.003
molecular function	cytoskeletal protein binding	GO:0008092	638	86	58.02	1.48	0.0001	0.003
molecular function	transcription factor binding	GO:0008134	432	62	39.29	1.58	0.0002	0.0057
molecular function	adenyl nucleotide binding	GO:0030554	1516	178	137.87	1.29	0.0002	0.0057
molecular function	nucleoside binding	GO:0001882	1852	210	168.43	1.25	0.0003	0.0075
molecular function	cis-trans isomerase activity	GO:0016859	37	11	3.36	3.27	0.0003	0.0075
molecular function	BH domain binding	GO:0051400	8	5	0.73	6.87	0.0003	0.0075
molecular function	purine ribonucleoside binding	GO:0032550	1838	208	167.16	1.24	0.0003	0.0075
molecular function	ribonucleoside binding	GO:0032549	1842	208	167.52	1.24	0.0004	0.0086
molecular function	purine nucleoside binding	GO:0001883	1841	208	167.43	1.24	0.0004	0.0086
molecular function	ATP-dependent DNA helicase activity	GO:0004003	32	10	2.91	3.44	0.0004	0.0086
molecular function	single-stranded DNA binding	GO:0003697	63	15	5.73	2.62	0.0004	0.0086
molecular function	collagen binding	GO:0005518	50	13	4.55	2.86	0.0004	0.0086
molecular function	DNA helicase activity	GO:0003678	45	12	4.09	2.93	0.0005	0.0098
molecular function	purine ribonucleoside triphosphate binding	GO:0035639	1829	206	166.34	1.24	0.0005	0.0098
cellular component	organelle lumen	GO:0043233	3340	517	289.68	1.78	3.12e-48	1.54e-45
cellular component	membrane-enclosed lumen	GO:0031974	3385	520	293.58	1.77	1.58e-47	3.9e-45
cellular component	intracellular part	GO:0044424	12237	1284	1061.31	1.21	4.06e-47	6.69e-45
cellular component	nuclear part	GO:0044428	3071	484	266.35	1.82	9.4e-47	1.16e-44
cellular component	intracellular organelle lumen	GO:0070013	3294	507	285.69	1.77	2.69e-46	2.21e-44
cellular component	intracellular organelle part	GO:0044446	6725	843	583.26	1.45	2.44e-46	2.21e-44
cellular component	organelle part	GO:0044422	6812	847	590.8	1.43	4.78e-45	3.37e-43
cellular component	intracellular	GO:0005622	12564	1299	1089.67	1.19	5.86e-44	3.62e-42
cellular component	nuclear lumen	GO:0031981	2737	434	237.38	1.83	1.12e-41	6.15e-40
cellular component	membrane-bounded organelle	GO:0043227	9598	1073	832.43	1.29	1.33e-41	6.57e-40
cellular component	intracellular membrane-bounded organelle	GO:0043231	9587	1071	831.48	1.29	3.2e-41	1.44e-39
cellular component	organelle	GO:0043226	10651	1154	923.76	1.25	3.91e-41	1.61e-39
cellular component	intracellular organelle	GO:0043229	10636	1152	922.46	1.25	7.89e-41	3e-39
cellular component	nucleus	GO:0005634	5955	738	516.47	1.43	2.47e-35	8.72e-34
cellular component	nucleoplasm	GO:0005654	1478	259	128.19	2.02	2.77e-30	9.12e-29
cellular component	cytoplasm	GO:0005737	9130	993	791.84	1.25	8.12e-29	2.51e-27
cellular component	non-membrane-bounded organelle	GO:0043228	3800	505	329.57	1.53	4.26e-28	1.17e-26
cellular component	intracellular non-membrane-bounded organelle	GO:0043232	3800	505	329.57	1.53	4.26e-28	1.17e-26
cellular component	nucleolus	GO:0005730	1545	237	134	1.77	1.63e-19	4.24e-18
cellular component	chromosome	GO:0005694	626	122	54.29	2.25	5.46e-18	1.35e-16
cellular component	cell part	GO:0044464	14643	1372	1269.98	1.08	5.82e-18	1.37e-16
cellular component	cell	GO:0005623	14644	1372	1270.07	1.08	6.14e-18	1.38e-16
cellular component	cytoplasmic part	GO:0044444	6772	742	587.33	1.26	1.03e-17	2.21e-16
cellular component	cytosol	GO:0005829	2372	319	205.72	1.55	2.67e-17	5.5e-16
cellular component	chromosomal part	GO:0044427	530	104	45.97	2.26	1.09e-15	2.15e-14
cellular component	condensed chromosome	GO:0000793	167	47	14.48	3.24	1.79e-13	3.4e-12
cellular component	macromolecular complex	GO:0032991	3864	450	335.12	1.34	2.83e-13	5.18e-12
cellular component	condensed chromosome, centromeric region	GO:0000779	88	32	7.63	4.19	6.21e-13	1.1e-11
cellular component	chromosome, centromeric region	GO:0000775	148	42	12.84	3.27	2.55e-12	4.34e-11
cellular component	condensed chromosome kinetochore	GO:0000777	83	30	7.2	4.17	3.92e-12	6.45e-11
cellular component	spindle	GO:0005819	233	54	20.21	2.67	1.44e-11	2.29e-10
cellular component	kinetochore	GO:0000776	104	33	9.02	3.66	2.04e-11	3.15e-10
cellular component	nucleoplasm part	GO:0044451	820	120	71.12	1.69	6.07e-09	9.09e-08
cellular component	protein complex	GO:0043234	3278	369	284.3	1.3	8.21e-09	1.19e-07
cellular component	nuclear chromosome	GO:0000228	285	55	24.72	2.23	1.23e-08	1.74e-07
cellular component	MCM complex	GO:0042555	11	9	0.95	9.43	1.27e-08	1.74e-07
cellular component	ribonucleoprotein complex	GO:0030529	553	88	47.96	1.83	1.49e-08	1.99e-07
cellular component	nuclear chromosome part	GO:0044454	242	48	20.99	2.29	4.26e-08	5.54e-07
cellular component	nuclear body	GO:0016604	274	52	23.76	2.19	5.41e-08	6.85e-07
cellular component	spindle pole	GO:0000922	98	26	8.5	3.06	1.64e-07	2.03e-06

## Sheet: 10 weeks PC left
GO categories enriched in the left spinal cord at 10 weeks PC (15 genes)
sub-root	category name	GO ID	C	O	E	R	rawP	adjP
cellular component	DNA-directed RNA polymerase II, holoenzyme	GO:0016591	89	2	0.06	34.84	0.0014	0.0158
cellular component	nuclear DNA-directed RNA polymerase complex	GO:0055029	100	2	0.06	31.01	0.0018	0.0158
cellular component	RNA polymerase complex	GO:0030880	101	2	0.07	30.7	0.0018	0.0158
cellular component	DNA-directed RNA polymerase complex	GO:0000428	100	2	0.06	31.01	0.0018	0.0158

## Sheet: 10 weeks PC right
GO categories enriched in the right spinal cord at 10 weeks PC (9 genes)
sub-root	category name	GO ID	C	O	E	R	rawP	adjP
biological process	mechanosensory behavior	GO:0007638	9	2	0	406.39	9.4e-06	0.002
biological process	subpallium development	GO:0021544	18	2	0.01	230.19	3.99e-05	0.0042
biological process	positive regulation of cell proliferation	GO:0008284	655	4	0.36	11.17	0.0002	0.0106
biological process	anatomical structure morphogenesis	GO:0009653	2055	6	1.12	5.34	0.0002	0.0106
biological process	anatomical structure formation involved in morphogenesis	GO:0048646	1594	5	0.87	5.74	0.0006	0.0211
biological process	cerebral cortex development	GO:0021987	72	2	0.04	50.8	0.0007	0.0211
biological process	single-organism behavior	GO:0044708	334	3	0.18	16.43	0.0006	0.0211
biological process	positive regulation of reproductive process	GO:2000243	105	2	0.06	34.83	0.0014	0.0295
biological process	pallium development	GO:0021543	106	2	0.06	34.5	0.0014	0.0295
biological process	sensory organ development	GO:0007423	436	3	0.24	12.58	0.0013	0.0295
biological process	response to mechanical stimulus	GO:0009612	134	2	0.07	27.29	0.0022	0.0309
biological process	blood vessel development	GO:0001568	492	3	0.27	11.15	0.0019	0.0309
biological process	behavior	GO:0007610	508	3	0.28	10.8	0.002	0.0309
biological process	regulation of cell proliferation	GO:0042127	1177	4	0.64	6.21	0.0022	0.0309
biological process	vasculature development	GO:0001944	517	3	0.28	10.61	0.0022	0.0309
biological process	neurological system process	GO:0050877	1237	4	0.68	5.91	0.0027	0.0356
biological process	respiratory tube development	GO:0030323	159	2	0.09	23	0.0031	0.0363
biological process	lung development	GO:0030324	156	2	0.09	23.45	0.003	0.0363
biological process	system development	GO:0048731	3521	6	1.93	3.12	0.0034	0.0369
biological process	telencephalon development	GO:0021537	168	2	0.09	21.77	0.0035	0.0369
biological process	respiratory system development	GO:0060541	179	2	0.1	20.43	0.004	0.0393
biological process	ear development	GO:0043583	183	2	0.1	19.99	0.0041	0.0393
biological process	regulation of reproductive process	GO:2000241	200	2	0.11	18.29	0.0049	0.045
biological process	organ morphogenesis	GO:0009887	802	3	0.44	6.84	0.0075	0.0472
biological process	camera-type eye development	GO:0043010	237	2	0.13	15.43	0.0069	0.0472
biological process	single-multicellular organism process	GO:0044707	5612	7	3.07	2.28	0.0065	0.0472
biological process	multicellular organismal process	GO:0032501	5644	7	3.09	2.27	0.0067	0.0472
biological process	anatomical structure development	GO:0048856	4030	6	2.2	2.72	0.0071	0.0472
biological process	multicellular organismal development	GO:0007275	4077	6	2.23	2.69	0.0076	0.0472
biological process	embryonic organ morphogenesis	GO:0048562	217	2	0.12	16.85	0.0058	0.0472
biological process	response to abiotic stimulus	GO:0009628	807	3	0.44	6.8	0.0076	0.0472
biological process	circulatory system development	GO:0072359	754	3	0.41	7.28	0.0063	0.0472
biological process	cell proliferation	GO:0008283	1548	4	0.85	4.73	0.0062	0.0472
biological process	cardiovascular system development	GO:0072358	754	3	0.41	7.28	0.0063	0.0472
biological process	system process	GO:0003008	1695	4	0.93	4.32	0.0086	0.049
biological process	cell-type specific apoptotic process	GO:0097285	261	2	0.14	14.01	0.0083	0.049
biological process	regulation of macromolecule metabolic process	GO:0060255	4151	6	2.27	2.64	0.0084	0.049
