# Supplementary material for: Epigenetic regulation of lateralized fetal spinal gene expression underlies hemispheric asymmetries
Source: eLife. 2017 Feb 1;6:e22784. doi: 10.7554/eLife.22784 (PMC5295814; doi:10.7554/eLife.22784)
Supplement: Figure 3—source data 1. — DOI: http://dx.doi.org/10.7554/eLife.22784.007 [file elife-22784-fig3-data1.xlsx]

## Sheet: 8 weeks PC miRNAs
Asymmetrically expressed microRNAs in the spinal cord at 8 weeks PC
MIRNA	MIRNA.SEQUENCE	MIRNA.LENGTH	READ.COUNTS.LEFT	RPKM.LEFT	READ.COUNTS.RIGHT	RPKM.RIGHT	LOG.2.FOLD.CHANGE
hsa-miR-219a-1-3p	AGAGUUGAGUCUGGACGUCCCG	22	10	467.365	82	1393.16	1.57573
hsa-miR-199a-3p	ACAGUAGUCUGCACAUUGGUUA	22	46	2149.88	428	7271.6	1.75802
hsa-miR-199b-5p	CCCAGUGUUUAGACUAUCUGUUC	23	56	2503.45	556	9035.57	1.8517
hsa-miR-145-5p	GUCCAGUUUUCCCAGGAAUCCCU	23	12	536.454	123	1998.88	1.89766
hsa-miR-199a-5p	CCCAGUGUUCAGACUACCUGUUC	23	52	2324.63	603	9799.37	2.07569

## Sheet: 10 weeks PC
Asymmetrically expressed microRNAs in the spinal cord at 10 weeks PC
MIRNA	MIRNA.SEQUENCE	MIRNA.LENGTH	READ.COUNTS.LEFT	RPKM.LEFT	READ.COUNTS.RIGHT	RPKM.RIGHT	LOG.2.FOLD.CHANGE
hsa-miR-96-5p	UUUGGCACUAGCACAUUUUUGCU	23	447	8127.01	67	1785.39	-2.18648
hsa-miR-182-5p	UUUGGCAAUGGUAGAACUCACACU	24	30777	536248	4880	124622	-2.10534
hsa-miR-183-5p	UAUGGCACUGGUAGAAUUCACU	22	13545	257458	2795	77865.7	-1.72528
hsa-miR-1246	AAUGGAUUUUUGGAGCAGG	19	190	4181.68	374	12064.4	1.5286
hsa-miR-1185-5p	AGAGGAUACCCUUUGUAUGUU	21	113	2250.14	238	6946.16	1.6262
hsa-miR-545-3p	UCAGCAAACAUUUAUUGUGUGC	22	16	304.122	34	947.203	1.63902

## Sheet: 12 weeks PC
Asymmetrically expressed microRNAs in the spinal cord at 12 weeks PC
MIRNA	MIRNA.SEQUENCE	MIRNA.LENGTH	READ.COUNTS.LEFT	RPKM.LEFT	READ.COUNTS.RIGHT	RPKM.RIGHT	LOG.2.FOLD.CHANGE
hsa-miR-199b-5p	CCCAGUGUUUAGACUAUCUGUUC	23	109	6419.15	19	771.786	-3.05611
hsa-miR-199a-5p	CCCAGUGUUCAGACUACCUGUUC	23	151	8892.58	34	1381.09	-2.6868
hsa-miR-379-5p	UGGUAGACUAUGGAACGUAGG	21	1462	94299	398	17706.6	-2.41296
hsa-miR-199a-3p	ACAGUAGUCUGCACAUUGGUUA	22	79	4863.89	25	1061.67	-2.19578
hsa-miR-126-3p	UCGUACCGUGAGUAAUAAUGCG	22	451	27767.2	161	6837.13	-2.02192
hsa-miR-362-5p	AAUCCUUGGAACCUAGGUGUGAGU	24	118	6659.62	58	2257.81	-1.56052
hsa-miR-766-3p	ACUCCAGCCCCACAGCCUCAGC	22	36	2216.45	188	7983.73	1.84881
