# Supplementary material for: Epigenetic regulation of lateralized fetal spinal gene expression underlies hemispheric asymmetries
Source: eLife. 2017 Feb 1;6:e22784. doi: 10.7554/eLife.22784 (PMC5295814; doi:10.7554/eLife.22784)
Supplement: Figure 3—source data 2. — DOI: http://dx.doi.org/10.7554/eLife.22784.008 [file elife-22784-fig3-data2.xlsx]

## Sheet: 8 weeks PC targets
Asymmetrically expressed RNA targets of asymmetrically expressed microRNAs at 8 weeks PC
ensembl_gene_id	gene	log2(fold change)	miRNA target
ENSG00000139910	NOVA1	-3.65524	hsa-miR-199a-3p
ENSG00000108262	GIT1	1.51053	hsa-miR-199a-5p, hsa-miR-199b-5p
ENSG00000169635	HIC2	1.51282	hsa-miR-145-5p
ENSG00000185591	SP1	1.51898	hsa-miR-199a-5p, hsa-miR-199b-5p
ENSG00000111196	MAGOHB	1.53367	hsa-miR-219a-1-3p
ENSG00000197930	ERO1L	1.57132	hsa-miR-199a-3p
ENSG00000115414	FN1	1.58484	hsa-miR-199a-3p
ENSG00000177425	PAWR	1.60937	hsa-miR-199a-3p
ENSG00000165609	NUDT5	1.61226	hsa-miR-199a-5p, hsa-miR-199b-5p
ENSG00000165801	ARHGEF40	1.61344	hsa-miR-145-5p
ENSG00000125648	SLC25A23,SLC25A41	1.62257	hsa-miR-199a-5p, hsa-miR-199b-5p
ENSG00000167258	CDK12	1.62525	hsa-miR-219a-1-3p
ENSG00000100445	SDR39U1	1.62843	hsa-miR-219a-1-3p
ENSG00000057019	DCBLD2	1.68527	hsa-miR-199a-3p
ENSG00000108424	KPNB1	1.69777	hsa-miR-199a-5p
ENSG00000161013	MGAT4B	1.76223	hsa-miR-199a-5p, hsa-miR-199b-5p
ENSG00000001617	SEMA3F	1.76782	hsa-miR-199a-5p, hsa-miR-199b-5p
ENSG00000164442	CITED2	1.77302	hsa-miR-199a-3p
ENSG00000187951	ARHGAP11B	1.80223	hsa-miR-219a-1-3p
ENSG00000101109	STK4	1.82127	hsa-miR-199a-5p, hsa-miR-199b-5p
ENSG00000170385	SLC30A1	1.82797	hsa-miR-199a-3p
ENSG00000189306	RRP7A	1.86568	hsa-miR-219a-1-3p
ENSG00000137269	LRRC1	1.93193	hsa-miR-199a-3p
ENSG00000113916	BCL6	1.95481	hsa-miR-145-5p
ENSG00000146535	GNA12	1.96344	hsa-miR-199a-3p
ENSG00000162433	AK4	1.97737	hsa-miR-199a-3p
ENSG00000115275	MOGS	2.00455	hsa-miR-199a-3p
ENSG00000153815	CMIP	2.01774	hsa-miR-199a-3p
ENSG00000119900	OGFRL1	2.02577	hsa-miR-199a-3p
ENSG00000169604	ANTXR1	2.02589	hsa-miR-219a-1-3p
ENSG00000131724	IL13RA1	2.03766	hsa-miR-199a-3p
ENSG00000197299	BLM	2.13522	hsa-miR-145-5p
ENSG00000226479	TMEM185B	2.14297	hsa-miR-199a-3p
ENSG00000164930	FZD6	2.16007	hsa-miR-199a-5p, hsa-miR-199b-5p
ENSG00000099901	RANBP1	2.22253	hsa-miR-199a-5p, hsa-miR-199b-5p
ENSG00000134954	ETS1	2.24353	hsa-miR-199a-5p, hsa-miR-199b-5p
ENSG00000142949	PTPRF	2.24747	hsa-miR-199a-3p
ENSG00000008282	SYPL1	2.27357	hsa-miR-199a-3p
ENSG00000128567	PODXL	2.28494	hsa-miR-145-5p, hsa-miR-199a-5p, hsa-miR-199b-5p
ENSG00000153179	RASSF3	2.35576	hsa-miR-199a-5p, hsa-miR-199b-5p
ENSG00000128311	TST	2.38036	hsa-miR-199a-5p, hsa-miR-199b-5p
ENSG00000156675	RAB11FIP1	2.45441	hsa-miR-199a-5p, hsa-miR-199b-5p
ENSG00000221968	FADS3	2.49232	hsa-miR-199a-5p, hsa-miR-199b-5p
ENSG00000130202	PVRL2	2.51934	hsa-miR-199a-3p
ENSG00000158555	GDPD5	2.53098	hsa-miR-145-5p
ENSG00000166949	SMAD3	2.57314	hsa-miR-145-5p
ENSG00000170345	FOS	2.6536	hsa-miR-199a-3p
ENSG00000136068	FLNB	2.67941	hsa-miR-145-5p
ENSG00000133226	SRRM1	2.69626	hsa-miR-199a-5p, hsa-miR-199b-5p
ENSG00000136982	DSCC1	2.72537	hsa-miR-199a-3p
ENSG00000147454	SLC25A37	2.77204	hsa-miR-199a-5p, hsa-miR-199b-5p
ENSG00000161326	DUSP14	2.82974	hsa-miR-199a-5p, hsa-miR-199b-5p
ENSG00000087191	PSMC5	2.87749	hsa-miR-145-5p
ENSG00000111799	COL12A1	2.92236	hsa-miR-199a-3p
ENSG00000004399	PLXND1	2.98132	hsa-miR-199a-5p, hsa-miR-199b-5p
ENSG00000117298	ECE1	3.06235	hsa-miR-199a-5p, hsa-miR-199b-5p
ENSG00000159399	HK2	3.38006	hsa-miR-199a-5p, hsa-miR-199b-5p
ENSG00000168938	PPIC	3.38295	hsa-miR-219a-1-3p
ENSG00000160877	NACC1	3.43532	hsa-miR-199a-3p
ENSG00000172269	DPAGT1	3.46589	hsa-miR-145-5p
ENSG00000122952	ZWINT	3.56302	hsa-miR-219a-1-3p
ENSG00000162302	RPS6KA4	3.768	hsa-miR-145-5p
ENSG00000137309	HMGA1	4.48256	hsa-miR-145-5p
ENSG00000005884	ITGA3	4.67143	hsa-miR-199a-3p, hsa-miR-199b-5p
ENSG00000137571	SLCO5A1	4.7867	hsa-miR-199a-5p

## Sheet: 10 weeks PC targets
Asymmetrically expressed RNA targets of asymmetrically expressed microRNAs at 10 weeks PC
ensembl_gene_id	gene	log2(fold_change)	miRNA target
ENSG00000137878	POLR2M	-2.28219	hsa-miR-182-5p, hsa-miR-96-5p
ENSG00000176658	MYO1D	-1.83651	hsa-miR-182-5p, hsa-miR-96-5p
ENSG00000107242	PIP5K1B	1.67446	hsa-miR-182-5p, hsa-miR-1246
ENSG00000135250	SRPK2	1.76617	hsa-miR-1246
ENSG00000128573	FOXP2	2.281	hsa-miR-1246
ENSG00000006468	ETV1	2.73874	hsa-miR-545-3p

## Sheet: 12 weeks PC targets
Asymmetrically expressed RNA targets of asymmetrically expressed microRNAs at 12 weeks PC
gene	ensembl_gene_id	log2(fold_change)	miRNA target
ZNF257	ENSG00000197134	1.54048	hsa-miR-766-3p
