# Supplementary material for: Epigenetic regulation of lateralized fetal spinal gene expression underlies hemispheric asymmetries
Source: eLife. 2017 Feb 1;6:e22784. doi: 10.7554/eLife.22784 (PMC5295814; doi:10.7554/eLife.22784)
Supplement: Figure 3—source data 3. — DOI: http://dx.doi.org/10.7554/eLife.22784.009 [file elife-22784-fig3-data3.xlsx]

## Sheet: 8 weeks PC left
Enriched KEGG pathways in the left spinal cord at 8 weeks PC
KEGG pathway	p-value	#genes	#miRNAs
-	-	-	-

## Sheet: 8 weeks PC right
Enriched KEGG pathways in the right spinal cord at 8 weeks PC
KEGG pathway	p-value	#genes	#miRNAs
TGF-beta signaling pathway	3.87112e-06	10	5
Hippo signaling pathway	0.00235524	15	5
Wnt signaling pathway	0.00875241	18	5
Signaling pathways regulating pluripotency of stem cells	0.0106203	16	5
Amphetamine addiction	0.0108762	9	4
Adherens junction	0.012306	12	5
Glioma	0.0133429	9	5
FoxO signaling pathway	0.0280086	16	5
N-Glycan biosynthesis	0.0378556	7	4
ErbB signaling pathway	0.0378556	12	4
Circadian rhythm	0.0378556	8	4
Proteoglycans in cancer	0.0378556	22	5

## Sheet: 10 weeks PC left
Enriched KEGG pathways in the left spinal cord at 10 weeks PC
KEGG pathway	p-value	#genes	#miRNAs
Estrogen signaling pathway	4.4624e-07	23	3
GABAergic synapse	2.76848e-06	19	3
Morphine addiction	8.90029e-06	19	3
Proteoglycans in cancer	1.37242e-05	41	3
Regulation of actin cytoskeleton	1.79374e-05	49	3
Bacterial invasion of epithelial cells	3.86762e-05	21	3
Vasopressin-regulated water reabsorption	0.000173603	13	3
Phosphatidylinositol signaling system	0.000697575	18	3
Rap1 signaling pathway	0.00219494	42	3
Glutamatergic synapse	0.00219494	22	3
Long-term depression	0.00219494	15	3
Amphetamine addiction	0.00388622	14	3
Ras signaling pathway	0.00393523	36	3
Cocaine addiction	0.00504928	11	3
Neurotrophin signaling pathway	0.00575265	27	3
Prostate cancer	0.00615064	20	3
ECM-receptor interaction	0.00698886	14	3
Axon guidance	0.00851503	25	3
Retrograde endocannabinoid signaling	0.010336	22	3
Glycosphingolipid biosynthesis - ganglio series	0.0115174	4	2
Inositol phosphate metabolism	0.018068	14	3
Adrenergic signaling in cardiomyocytes	0.018068	27	3
Gap junction	0.018068	18	3
Glioma	0.018068	13	3
Cholinergic synapse	0.0187402	25	3
Pathways in cancer	0.0187402	65	3
Platelet activation	0.0190846	25	3
Long-term potentiation	0.0190846	16	3
Melanogenesis	0.0190846	19	3
Oxytocin signaling pathway	0.0190846	31	3
Shigellosis	0.0190846	15	3
Oocyte meiosis	0.0196843	23	3
Nicotine addiction	0.0241716	9	3
Prolactin signaling pathway	0.0251325	13	3
Dopaminergic synapse	0.0272879	27	3
Choline metabolism in cancer	0.0282233	22	3
TGF-beta signaling pathway	0.0294104	14	3
PI3K-Akt signaling pathway	0.0296152	53	3
Serotonergic synapse	0.0358056	20	3
Adherens junction	0.048923	15	3

## Sheet: 10 weeks PC right
Enriched KEGG pathways in the right spinal cord at 10 weeks PC
KEGG pathway	p-value	#genes	#miRNAs
Nicotine addiction	0.0272064	4	3
Amphetamine addiction	0.0475601	6	3

## Sheet: 12 weeks PC left
Enriched KEGG pathways in the left spinal cord at 12 weeks PC
KEGG pathway	p-value	#genes	#miRNAs
Biotin metabolism	6.96118e-06	1	1
N-Glycan biosynthesis	0.00128362	8	4
ErbB signaling pathway	0.00128362	17	5
Choline metabolism in cancer	0.00720533	16	5
Amphetamine addiction	0.0108335	9	4
Glioma	0.0132031	10	5
Cell adhesion molecules (CAMs)	0.0139751	6	6
Glycosaminoglycan biosynthesis - keratan sulfate	0.0197173	2	3
Adherens junction	0.0197173	12	5
Hippo signaling pathway	0.0219496	14	5
Dopaminergic synapse	0.0263784	19	5
Pathways in cancer	0.03823	39	6
Aldosterone-regulated sodium reabsorption	0.0392703	8	4
FoxO signaling pathway	0.0392703	18	6

## Sheet: 12 weeks PC right
Enriched KEGG pathways in the right spinal cord at 12 weeks PC
KEGG pathway	p-value	#genes	#miRNAs
Thyroid hormone synthesis	7.11138e-05	4	1
Tight junction	0.0430509	13	1
