# Supplementary material for: Epigenetic regulation of lateralized fetal spinal gene expression underlies hemispheric asymmetries
Source: eLife. 2017 Feb 1;6:e22784. doi: 10.7554/eLife.22784 (PMC5295814; doi:10.7554/eLife.22784)
Supplement: Figure 3—source data 4. — DOI: http://dx.doi.org/10.7554/eLife.22784.010 [file elife-22784-fig3-data4.xlsx]

## Sheet: 8 weeks PC left
Asymmetrically methylated CpG sites in the left spinal cord at 8 weeks PC
Chr	Position	Strand	Feature	GeneID	p value	mean methylation difference
chr14	104553544	-	Intron	NM_001080464	2.21647e-33	-100
chr1	30216896	+	-	-	5.85184e-31	-100
chr17	77094877	+	Intron	NM_001082575	1.43236e-28	-100
chr7	72205033	-	Intron	NM_001145440,NM_001145441	2.30892e-28	-100
chr14	104553526	-	Intron	NM_001080464	5.77393e-27	-100
chr16	2743053	-	Intron	NM_018992	2.52484e-25	-100
chr17	79431089	-	Exon	NM_001080519	2.82222e-25	-100
chr7	152591459	+	-	-	2.24215e-22	-100
chr1	17995397	-	Intron	NM_001011722,NM_018125	1.24363e-20	-100
chr1	2485606	+	-	-	5.5763e-20	-100
chr14	106285212	+	-	-	1.39155e-16	-100
chr2	30778911	+	Intron	NM_001002257,NM_182551	5.37607e-16	-100
chr12	133057426	-	-	-	8.17511e-15	-100
chr2	121154602	-	-	-	1.29456e-12	-100
chr1	161160983	+	Exon	NM_005099	1.6095e-12	-100
chr16	29231604	+	-	-	2.12241e-12	-100
chr17	45915315	-	Exon	NM_001145023	1.07981e-11	-100
chr17	21901479	-	-	-	6.75907e-10	-100
chr12	133017345	+	-	-	7.36987e-10	-100
chr2	239317727	-	-	-	8.14021e-10	-100
chr17	76481578	+	Intron	NM_173628	1.00026e-09	-100
chr19	6229140	-	Intron	NM_005934	1.6718e-09	-100
chr15	99591168	-	-	-	1.60456e-08	-100
chrX	84270668	-	Intron	NM_198450	1.58267e-07	-100
chr7	73443035	+	Promoter	NM_000501,NM_001081752,NM_001081753,NM_001081754,NM_001081755	2.84267e-07	-100
chr8	145130330	+	-	-	6.28139e-06	-100
chr1	2377514	+	-	-	1.07783e-05	-100
chr7	105223689	-	-	-	1.27237e-05	-100
chr7	57218104	-	-	-	3.57273e-05	-100
chr20	62084094	+	Intron	NM_004518,NM_172106,NM_172107,NM_172108,NM_172109	0.000195531	-100
chr2	131521681	-	Exon	NM_001105193,NM_001105194,NM_152698	0.000532045	-100
chr8	43035737	+	Intron	NM_152419	1.78339e-16	-99.8507
chr17	6571870	-	-	-	2.71286e-07	-99.7768
chr3	19275727	-	Intron	NM_144633	6.98675e-08	-99.5455
chr1	10718630	-	-	-	3.57734e-21	-99.3243
chr15	74357388	-	-	-	1.52384e-20	-99.1525
chr2	121657617	-	Intron	NM_005270	1.5234e-08	-99.1525
chr9	140567990	-	Intron	NM_001145527,NM_024757	4.78441e-08	-99
chr5	180046585	+	Intron	NM_002020,NM_182925	1.3268e-13	-98.9362
chr1	65513276	+	-	-	2.68916e-15	-98.913
chr10	123461820	+	-	-	4.5742e-09	-98.8372
chrX	49085325	-	Intron	NM_001256789,NM_001256790,NM_005183	1.37833e-16	-98.8318
chr14	104553503	-	Intron	NM_001080464	4.66874e-25	-98.7805
chr16	89118850	-	-	-	7.1138e-21	-98.3607
chr1	33179372	-	-	-	5.64761e-13	-98.3333
chr7	40290650	-	Intron	NM_001193312	3.63568e-18	-98.2759
chr17	47953308	-	-	-	1.1339e-70	-98.2576
chr19	4158096	+	Intron	NM_032607	1.31391e-29	-98.1962
chr19	996246	-	-	-	1.213e-38	-97.9332
chr3	195943131	-	Promoter	NM_152672	1.14304e-10	-97.9167
chr7	1947203	-	Intron	NM_001013836,NM_001013837,NM_003550	6.99925e-10	-97.9167
chr9	130565855	+	Promoter	NM_001018078	2.29685e-17	-97.7124
chr16	77925826	+	Intron	NM_020927	2.48743e-33	-97.6415
chr16	85351476	-	-	-	3.68509e-09	-97.2222
chr2	45870713	-	-	-	0.000385407	-96.9697
chr15	78190041	-	-	-	1.39956e-16	-96.875
chr19	819781	-	Intron	NM_001270366,NM_024888	1.06139e-36	-96.8468
chr2	219186643	-	Intron	NM_015488	5.33189e-14	-96.6014
chr11	1226972	-	-	-	5.56878e-10	-96.5752
chr12	11919511	+	Intron	NM_001987	7.06881e-08	-96.4912
chr16	69985537	-	-	-	5.72203e-08	-95.8978
chr8	21905892	+	Exon	NM_003867	1.11854e-05	-95.8333
chr7	100172069	+	Exon	NM_002319	8.44901e-36	-95.4708
chr8	142427306	-	-	-	1.08135e-29	-95.3125
chr16	33964553	+	-	-	1.02418e-05	-95.2381
chr11	48921741	+	-	-	1.78468e-22	-95.1613
chr2	38605531	-	-	-	7.62036e-07	-94.7368
chr1	8409054	-	-	-	0.00383475	-94.7368
chr1	1905033	+	-	-	2.3654e-10	-94.6667
chr5	41637615	-	-	-	1.19627e-31	-94.6615
chr1	11014931	+	-	-	9.73025e-07	-94.5617
chr14	23835035	+	Promoter	NM_005864,NM_032459	1.39282e-15	-94.5602
chr14	23835131	+	Promoter	NM_005864,NM_032459	1.39282e-15	-94.5602
chr20	10491548	-	Intron	NM_001009608	2.28588e-14	-94.4072
chr19	58571387	-	Exon	NM_003436	2.23242e-26	-94.3691
chr17	45924652	-	Exon	NM_001258248,NM_199262	1.52109e-17	-94.2204
chr19	1614403	+	Intron	NM_003200	1.44321e-12	-94
chr7	157486490	-	Intron	NM_002847,NM_130842,NM_130843	9.21234e-31	-93.9779
chr19	58571296	-	Promoter	NM_001164527,NM_001164529,NM_001164530,NM_003436,NM_007134	2.23242e-26	-93.9073
chr8	142427231	-	-	-	1.82008e-21	-93.8645
chr19	33372873	+	Exon	NM_032816	2.73232e-07	-93.8356
chr20	29518575	+	-	-	1.06833e-13	-93.8131
chr9	127625722	-	-	-	3.68187e-23	-93.75
chr5	134411943	-	-	-	1.27479e-07	-93.75
chr6	41774071	-	Exon	NM_018561	2.26896e-07	-93.75
chr7	72849013	+	Exon	NM_003508	0.00194734	-93.75
chr7	157486477	-	Intron	NM_002847,NM_130842,NM_130843	1.49872e-28	-93.6489
chr7	103181627	+	-	-	0.000305697	-93.597
chr7	43681771	-	Intron	NM_018224,NR_047701	6.38606e-10	-93.5889
chr5	172044966	+	-	-	0.00011432	-93.5696
chr17	67322988	+	Promoter	NM_172232	6.81377e-09	-93.4783
chr17	29038423	-	Intron	NR_024187	3.42428e-08	-93.4392
chr20	29518399	+	-	-	1.16665e-13	-93.2749
chr5	163795274	+	-	-	2.56832e-10	-92.9817
chr8	144884566	+	Intron	NM_015356,NM_182706	1.33718e-09	-92.9104
chr9	138968098	-	Intron	NM_144653	1.25868e-14	-92.8571
chr17	920420	+	Intron	NM_001256847	0.00283012	-92.8571
chr8	142427221	-	-	-	1.57919e-22	-92.7484
chr8	142427309	-	-	-	1.57919e-22	-92.7484
chr1	17907265	+	Promoter	NM_001011722	1.50344e-06	-92.732
chr13	30918449	-	Intron	NR_024464	4.78765e-18	-92.6471
chr16	837545	-	Promoter	NM_058192	1.37566e-18	-92.6022
chr16	29722924	-	-	-	9.53047e-11	-92.555
chr6	168464141	-	Intron	NM_001122841,NM_024919	2.90635e-10	-92.5442
chr1	3418844	+	Intron	NM_001409	5.22543e-08	-92.5
chr13	90529344	+	-	-	2.95485e-15	-92.3913
chr1	30852347	+	-	-	1.55421e-10	-92.364
chr15	76640024	-	-	-	5.2017e-10	-92.3512
chr16	84256165	-	Exon	NM_172347	8.11198e-24	-92.2228
chr3	47831721	-	-	-	1.50291e-06	-92.1795
chr14	91825933	+	Intron	NM_001080414	1.43814e-14	-92.1225
chr11	365624	+	-	-	2.46429e-13	-92.1053
chr11	1244848	-	Promoter	NM_002458	9.83745e-18	-92.029
chr16	63161421	+	-	-	1.84746e-18	-92.013
chr2	13448512	-	-	-	2.31795e-30	-92
chr6	88757534	+	Exon	NM_030960	2.12325e-06	-92
chr19	728403	-	Intron	NM_001040134,NM_002579	9.21734e-10	-91.9818
chr22	50178892	-	Intron	NM_014577	3.81676e-27	-91.8269
chr11	2308627	-	-	-	2.87796e-13	-91.6667
chr9	136082059	+	Intron	NM_014581	1.852e-05	-91.6667
chr19	49244675	-	Exon	NM_182575	2.95794e-14	-91.484
chr17	78995288	+	-	-	2.50252e-06	-91.342
chr11	14666159	-	Exon	NM_000922	4.62144e-21	-91.2328
chr11	14666173	-	Exon	NM_000922	4.62144e-21	-91.2287
chr17	40705733	-	Intron	NM_000413	2.92641e-15	-91.1859
chr17	73501021	+	Exon	NM_001142643,NM_020753	1.45482e-13	-91.1765
chr2	96428239	+	-	-	4.67359e-05	-91.1765
chr13	61238331	+	-	-	7.16788e-05	-91.0268
chr19	15913494	+	-	-	0.000428607	-91.0268
chr11	14666069	-	Exon	NM_000922	4.62144e-21	-91.0005
chr11	14666061	-	Exon	NM_000922	4.62144e-21	-90.9883
chr11	14666179	-	Exon	NM_000922	1.4649e-20	-90.9799
chr22	46804807	-	Intron	NM_014246	1.0719e-09	-90.9091
chr19	46145133	+	Promoter	NM_001242348	1.99251e-12	-90.7986
chr11	14666185	-	Exon	NM_000922	4.62144e-21	-90.7842
chr12	21591167	+	Promoter	NM_024854	9.38706e-32	-90.7604
chr16	73126746	+	Exon	NR_027756	6.94333e-31	-90.6939
chr1	38398144	-	Intron	NM_005540	0.000489221	-90.6667
chr11	14666162	-	Exon	NM_000922	4.29501e-20	-90.4908
chr6	160248256	-	-	-	3.14589e-11	-90.4907
chr19	43967282	+	-	-	1.92816e-18	-90.4418
chr19	14598428	+	Intron	NM_202494	1.24646e-09	-90.4348
chr8	145626943	-	Exon	NM_013291	8.61239e-05	-90.4261
chr2	39944334	-	Exon	NM_001167959,NM_152390	2.81865e-34	-90.3257
chr9	139856054	+	-	-	5.53671e-18	-90.2592
chr19	30936535	+	Exon	NM_014717	2.90567e-09	-90.2172
chr11	47290161	-	Promoter	NM_130470	5.14425e-17	-90.0724
chr2	121371843	-	-	-	3.04822e-09	-90.0483
chr20	644026	+	Exon	NM_033129	4.08888e-24	-90
chr20	644015	+	Exon	NM_033129	4.0889e-24	-90
chrX	29226684	+	Intron	NM_014271	2.08124e-10	-89.8295
chr11	120837915	+	-	-	1.80062e-23	-89.8154
chr1	45341865	+	Intron	NM_001166588,NM_001261418,NM_020365	7.94711e-10	-89.8065
chr8	144406776	-	Exon	NM_001258446,NM_001258447,NM_052963	1.78162e-14	-89.8008
chr1	11561580	-	Exon	NM_020780	6.49865e-10	-89.6789
chr9	131166352	+	-	-	7.9843e-21	-89.6552
chrX	39676451	-	-	-	8.87739e-07	-89.6365
chr1	204041219	-	-	-	1.8742e-05	-89.5105
chr9	137997588	-	Intron	NM_014279	3.98929e-17	-89.4197
chr14	105251552	+	Intron	NM_001014431,NM_001014432,NM_005163	4.29501e-48	-89.372
chr19	56075891	-	-	-	2.10108e-11	-89.2962
chr17	36898811	+	Intron	NM_007144	2.75463e-09	-89.2857
chr3	183817931	+	Promoter	NM_001256614,NM_182589,NM_198314	8.26417e-23	-89.2052
chr19	776686	+	-	-	3.84933e-15	-89.1738
chr21	46309495	-	Intron	NM_000211,NM_001127491	2.25134e-22	-89.1357
chr12	7865204	-	Intron	NM_199286	1.31619e-11	-89.107
chr19	39264255	-	Promoter	NM_002307	4.96824e-10	-89.0625
chr7	2699239	-	Intron	NM_025250	5.64856e-06	-89.0625
chr19	1471528	+	Exon	NM_005883	7.72615e-34	-89.0422
chr19	728379	-	Intron	NM_001040134,NM_002579	9.82899e-07	-89.0262
chr1	17086803	-	Intron	NM_001271733,NR_002729	0.000247243	-89.0244
chr7	72004482	-	-	-	9.29005e-27	-89.0029
chr16	85351515	-	-	-	1.28317e-07	-88.8889
chrX	129115107	-	-	-	1.35253e-13	-88.8673
chr4	111543423	-	Exon	NM_000325	7.19874e-24	-88.8397
chr4	38016279	-	Exon	NM_001253912,NM_015173	4.89953e-43	-88.8095
chr8	72460454	-	-	-	2.84043e-06	-88.7493
chr16	31141817	-	-	-	2.9573e-20	-88.7476
chr6	125966436	-	-	-	3.78299e-14	-88.7324
chr15	31619886	+	Exon	NM_015995	1.55599e-23	-88.7021
chr14	100151873	-	Intron	NM_006668	1.0553e-28	-88.6996
chr12	113915312	+	-	-	2.89172e-14	-88.6473
chr19	996191	-	-	-	3.32954e-29	-88.6
chr15	45695513	-	Exon	NM_024063,NR_027635	1.10053e-24	-88.5796
chr1	110396077	-	-	-	9.02119e-08	-88.5313
chrX	118407066	+	-	-	0.000797608	-88.5135
chr4	54672977	-	-	-	2.00942e-06	-88.5093
chr11	48921726	+	-	-	7.925e-19	-88.4946
chr9	95570613	+	-	-	5.70397e-40	-88.4158
chr20	25175754	+	Promoter	NM_001114089,NM_001247	0.000940368	-88.4146
chr19	51226489	+	Promoter	NM_002975	5.67486e-10	-88.3929
chr9	95570640	+	-	-	5.70397e-40	-88.2937
chr7	150069172	+	Exon	NM_001099695,NM_001099696,NM_013400	5.29651e-13	-88.2353
chr16	49445355	+	-	-	1.25574e-05	-88.2168
chr7	100362781	+	Intron	NM_003386,NM_173059	1.38913e-22	-88.195
chr11	420682	-	Intron	NM_001012302	8.7042e-07	-88.1944
chr1	3157821	+	Intron	NM_022114,NM_199454	4.14143e-09	-88.0999
chr1	22552466	-	-	-	1.78578e-06	-88.0952
chr13	79240003	-	-	-	1.83573e-17	-88.0904
chr9	132103515	-	-	-	7.2663e-28	-88.0555
chr5	163677823	+	-	-	0.00295728	-88.0208
chr9	32525383	-	Promoter	NM_014314	1.97291e-13	-87.987
chr11	63830331	+	Intron	NM_014067	4.42864e-13	-87.931
chrY	21665055	-	Promoter	NR_002923,NR_033732	1.45957e-28	-87.8861
chr19	3210429	+	-	-	2.44041e-12	-87.8788
chr7	150069137	+	Exon	NM_001099695,NM_001099696,NM_013400	2.45389e-10	-87.8788
chr1	32663764	-	Exon	NM_175852	0.000260002	-87.8788
chr1	2377399	+	-	-	1.15262e-05	-87.8378
chr1	2377415	+	-	-	1.15262e-05	-87.8378
chr6	34725444	+	Promoter	NM_003093,NR_029472	1.43336e-11	-87.8146
chr2	203524440	+	Intron	NM_173511	2.21645e-07	-87.7622
chr20	60576546	-	Intron	NM_003185	6.20318e-26	-87.7488
chr11	14666089	-	Exon	NM_000922	4.62144e-21	-87.7404
chr5	122196586	+	Intron	NM_014035	0.000163194	-87.5817
chr22	27052722	-	Promoter	NR_003491,NR_033319,NR_033320,NR_033321	1.62276e-11	-87.561
chr16	87628200	+	-	-	3.98375e-41	-87.5545
chr1	204828084	-	Intron	NM_001005388,NM_001005389,NM_001160332,NM_001160333,NM_015090	0.00147855	-87.5
chr1	40078460	+	-	-	8.85216e-30	-87.4656
chr12	38550259	+	-	-	1.10543e-21	-87.4168
chr11	47257014	+	Intron	NM_000107	2.5154e-14	-87.2727
chr16	46878325	+	-	-	2.78254e-06	-87.2727
chr19	52548903	+	Intron	NM_014650	0.000247455	-87.2166
chr10	101089924	+	Exon	NM_020348	1.45818e-38	-87.1984
chr12	106326171	+	-	-	1.14644e-23	-87.1041
chr8	28262124	+	-	-	1.63749e-18	-87.0232
chr20	21172580	+	Intron	NM_001163022,NM_001163023,NM_018474	3.32351e-15	-86.9995
chr7	3141397	-	-	-	2.76494e-07	-86.9899
chr10	76994475	+	Exon	NM_144589	6.84645e-43	-86.8771
chr21	41805141	+	Intron	NM_001271534,NM_001389,NR_073202	4.28302e-22	-86.845
chr19	55985815	-	-	-	1.62933e-17	-86.8276
chr2	2766519	-	-	-	5.08945e-15	-86.7647
chr10	135089284	+	Intron	NM_001164490	3.93983e-14	-86.7483
chr19	3220195	-	-	-	2.94474e-11	-86.7347
chr1	228505518	+	-	-	6.44515e-20	-86.6932
chr16	16099536	-	Intron	NM_004996	5.12373e-10	-86.6667
chr22	39474882	-	-	-	4.14121e-06	-86.6541
chr4	1316274	+	Exon	NM_001017405	4.56142e-06	-86.6379
chr19	519150	-	Exon	NM_033513	1.02785e-33	-86.612
chr5	142033028	-	Intron	NM_001257209	6.68616e-09	-86.4865
chr7	157192984	+	Intron	NM_058246	1.55649e-16	-86.4583
chr16	11295630	+	-	-	5.52347e-08	-86.3792
chr16	88237096	-	-	-	0.00247346	-86.3636
chr17	32953746	+	Intron	NM_207313	1.97402e-10	-86.359
chr1	46088070	-	Intron	NM_001114938,NM_001190182	1.42827e-45	-86.3463
chr19	519178	-	Exon	NM_033513	2.07806e-33	-86.3388
chr19	519184	-	Exon	NM_033513	9.9199e-33	-86.3388
chr5	55704923	-	-	-	6.09559e-07	-86.3167
chr8	66161004	-	-	-	2.71286e-07	-86.2903
chr1	204828167	-	Intron	NM_001005388,NM_001005389,NM_001160332,NM_001160333,NM_015090	0.00147855	-86.1486
chr1	204828175	-	Intron	NM_001005388,NM_001005389,NM_001160332,NM_001160333,NM_015090	0.00147855	-86.1486
chr7	98360697	+	-	-	3.11188e-28	-86.1446
chr12	131166828	-	-	-	1.79277e-14	-86.14
chr5	176106902	+	-	-	1.20225e-13	-86.1111
chr10	134567306	+	Intron	NM_005539	2.95293e-17	-86.1006
chr4	67722903	-	-	-	1.50068e-18	-86
chr3	13111511	-	Intron	NM_001134382	1.0631e-16	-86
chr14	73989388	+	Exon	NM_001220484,NM_203309	7.87858e-06	-86
chr4	3445050	-	-	-	4.28744e-12	-85.9848
chrX	46688992	-	-	-	4.6484e-12	-85.9756
chr1	936699	-	-	-	6.77498e-19	-85.868
chr14	105032874	+	-	-	1.19896e-15	-85.8491
chr22	43753070	-	-	-	1.41946e-22	-85.8333
chr19	4878423	+	-	-	9.81285e-06	-85.8333
chr7	1521818	-	Intron	NM_001080453	1.35951e-06	-85.8156
chr7	3033408	+	Intron	NM_032415	7.85884e-13	-85.8038
chr12	52431464	+	Intron	NM_001202233	8.69426e-05	-85.7576
chr3	143360328	+	Intron	NM_173653	4.48513e-09	-85.7407
chr16	32298096	+	-	-	1.038e-13	-85.7143
chr12	49735539	-	-	-	8.35696e-09	-85.7143
chr19	3317907	+	-	-	0.00118449	-85.7143
chr6	34725283	+	Exon	NM_003093,NR_029472	1.43336e-11	-85.559
chr6	34725288	+	Exon	NM_003093,NR_029472	1.43336e-11	-85.559
chr6	34725293	+	Exon	NM_003093,NR_029472	1.43336e-11	-85.559
chr6	34725305	+	Exon	NM_003093,NR_029472	1.43336e-11	-85.559
chr8	144950739	-	-	-	6.45926e-10	-85.5275
chr11	73068114	-	Exon	NM_014786	1.63907e-19	-85.4792
chr6	34725398	+	Promoter	NM_003093,NR_029472	1.43336e-11	-85.4719
chr2	237028297	-	Intron	NM_001037131,NM_014914	1.00641e-06	-85.461
chr7	150787505	+	Intron	NM_001042535,NM_031946	0.00104036	-85.4545
chr3	170626265	+	Promoter	NM_020390	2.02882e-18	-85.4505
chr11	75920632	+	-	-	3.89937e-21	-85.4167
chr1	1115054	+	Exon	NM_001130045	3.6668e-10	-85.4167
chr10	99665496	-	Intron	NM_001206528,NM_018058	9.36655e-06	-85.4167
chr4	65749412	-	-	-	0.00182886	-85.4167
chr9	69652008	+	Promoter	NR_024443	3.53247e-16	-85.3978
chr2	165811805	-	Exon	NM_001199148,NM_173512	4.74373e-10	-85.3846
chr16	34809661	-	-	-	6.38841e-19	-85.3604
chr12	120811021	+	-	-	8.46708e-31	-85.3281
chr7	55799333	+	-	-	0.00010446	-85.3003
chr19	5479947	+	-	-	1.50402e-06	-85.2941
chr12	52431505	+	Intron	NM_001202233	3.79601e-05	-85.2632
chr10	6278916	-	-	-	2.00259e-13	-85.2625
chr20	61507622	-	-	-	4.36176e-08	-85.1852
chr12	51965384	-	-	-	4.26954e-13	-85.1668
chr1	30172072	-	-	-	4.7753e-10	-85.1562
chr17	41402204	-	-	-	1.66889e-13	-85.1064
chr1	17907372	+	Promoter	NM_001011722	1.22681e-08	-85.088
chr12	132951245	-	-	-	1.85174e-32	-85.0365
chr1	248855034	+	-	-	2.20289e-19	-85.0282
chr20	29996309	+	-	-	1.3305e-09	-85.0028
chr16	4435150	+	Intron	NM_001201472,NM_001201473,NM_001201479,NM_024535	3.2247e-15	-85
chr9	116823849	+	-	-	9.65668e-10	-85
chr8	144361261	-	-	-	2.22919e-07	-85
chr3	17180488	+	-	-	1.46108e-26	-84.9925
chr19	4704469	-	Intron	NM_139159	1.14602e-06	-84.9896
chr2	237028338	-	Intron	NM_001037131,NM_014914	9.5617e-07	-84.9234
chr8	23220802	+	Exon	NR_038323	1.33633e-08	-84.9225
chr1	48058961	+	-	-	1.11296e-21	-84.8989
chr4	1655557	+	Intron	NM_001013622,NM_001174070	6.3539e-41	-84.8068
chr10	119644382	-	-	-	0.00224238	-84.7826
chr18	77705748	-	Intron	NM_001146343,NM_001146345,NM_025078	3.32213e-22	-84.7796
chr12	48551016	+	Promoter	NM_024095	1.12208e-26	-84.7623
chr5	177623245	-	-	-	7.61165e-10	-84.7574
chr20	61185679	-	-	-	6.65621e-08	-84.7155
chr15	45695664	-	Exon	NM_024063,NR_027635	7.9474e-19	-84.7117
chr15	45695634	-	Exon	NM_024063,NR_027635	3.00932e-19	-84.7084
chr19	29925471	+	Intron	NR_040029	7.01306e-19	-84.6791
chr14	24912347	-	Promoter	NM_020195	6.50071e-06	-84.6154
chr13	26087429	-	Intron	NM_016529	9.97442e-05	-84.6154
chr21	43102327	+	Intron	NR_024367	1.07288e-29	-84.6018
chr19	1469742	+	Exon	NM_005883	7.00518e-30	-84.4961
chr1	1136180	-	-	-	5.3396e-05	-84.4586
chr4	3445059	-	-	-	4.28865e-12	-84.4223
chr5	119774068	+	-	-	5.49079e-14	-84.4079
chr12	52431331	+	Intron	NM_001202233	5.6558e-05	-84.386
chr12	52431350	+	Intron	NM_001202233	5.6558e-05	-84.386
chr12	52431508	+	Intron	NM_001202233	5.6558e-05	-84.386
chr2	2575675	-	-	-	5.74254e-05	-84.3742
chr10	67406735	-	-	-	9.51822e-11	-84.3395
chr5	138730756	-	Exon	NM_001161546	2.87964e-18	-84.3324
chr2	114442285	+	-	-	1.56838e-05	-84.3284
chr7	1361975	-	-	-	1.46054e-09	-84.3023
chr10	134912435	+	Intron	NM_001083909	2.19893e-17	-84.2949
chr14	76887370	-	Intron	NM_004452	4.95645e-07	-84.2888
chr4	76862165	-	Exon	NM_001042402,NM_014435	0.000273585	-84.2857
chr4	76862195	-	Promoter	NM_001042402,NM_014435	0.000273585	-84.2857
chr4	76862199	-	Promoter	NM_001042402,NM_014435	0.000273585	-84.2857
chr4	76862215	-	Promoter	NM_001042402,NM_014435	0.000273585	-84.2857
chr4	76862217	-	Promoter	NM_001042402,NM_014435	0.000273585	-84.2857
chr4	76862226	-	Promoter	NM_001042402,NM_014435	0.000273585	-84.2857
chr4	76862230	-	Promoter	NM_001042402,NM_014435	0.000273585	-84.2857
chr4	76862242	-	Promoter	NM_001042402,NM_014435	0.000273585	-84.2857
chr8	24865632	+	-	-	4.90145e-11	-84.2593
chr9	127209185	-	-	-	2.76366e-07	-84.2501
chr7	16632862	-	-	-	2.67396e-06	-84.2401
chr17	44848770	+	Intron	NM_030753	4.31914e-09	-84.2342
chr9	133229993	-	-	-	7.76332e-13	-84.2105
chr9	136808032	-	Intron	NM_001134398,NM_003371	3.1471e-10	-84.2105
chr1	220983864	-	Intron	NM_022746	4.98275e-05	-84.1912
chr20	5776675	+	Intron	NM_152504	2.48063e-07	-84.1863
chr16	1047506	+	-	-	1.26853e-34	-84.1721
chr14	58729084	+	Intron	NM_002788,NM_152132,NR_038123	6.84988e-11	-84.1278
chr12	40983218	-	-	-	4.63164e-06	-84.1175
chr12	128933104	+	Intron	NM_001136103	5.44716e-10	-84.1121
chr14	23835113	+	Promoter	NM_005864,NM_032459	5.09818e-09	-84.001
chr9	139739535	+	Exon	NM_001080482	6.06284e-11	-83.9789
chr1	9721086	-	Intron	NM_005026	1.62295e-08	-83.9727
chr13	109937655	+	-	-	6.07031e-16	-83.9488
chr19	48106511	-	-	-	1.04007e-08	-83.9436
chr14	83108895	+	-	-	3.91672e-33	-83.8765
chr17	72741153	-	-	-	7.20831e-17	-83.871
chr8	144361256	-	-	-	3.2928e-07	-83.871
chr9	140083693	-	Exon	NM_003731	1.59053e-08	-83.8627
chr9	140083699	-	Exon	NM_003731	1.59053e-08	-83.8627
chr9	140083706	-	Exon	NM_003731	1.59053e-08	-83.8627
chr9	140083760	-	Promoter	NM_003731	1.59053e-08	-83.8627
chr14	24912317	-	Promoter	NM_020195	6.50071e-06	-83.8443
chr2	220379886	-	Exon	NM_182847	2.11174e-22	-83.8346
chr9	140083727	-	Promoter	NM_003731	1.70833e-08	-83.7759
chr3	188963007	-	Intron	NM_198485	4.49983e-12	-83.7577
chr14	24912199	-	Promoter	NM_020195	6.50071e-06	-83.75
chr18	29576155	+	-	-	2.7651e-10	-83.7396
chr16	67789661	-	Intron	NM_020850	0.00175985	-83.7209
chr12	52431323	+	Intron	NM_001202233	2.23296e-06	-83.7103
chr8	142427283	-	-	-	3.1406e-16	-83.6866
chr19	47933616	-	Exon	NM_015063	6.5903e-11	-83.6842
chr9	136696285	+	Intron	NM_001134398,NM_003371	2.51244e-17	-83.6607
chr9	125551943	+	Exon	NM_001001923	1.11904e-12	-83.6384
chr14	69229946	-	-	-	2.55156e-06	-83.6207
chr7	55908054	+	Intron	NM_207366	1.18738e-05	-83.6066
chr3	35976567	-	-	-	8.63639e-13	-83.6017
chr2	131130043	-	Exon	NM_001142370,NM_014369	1.94136e-20	-83.5966
chr15	45695642	-	Exon	NM_024063,NR_027635	2.39557e-18	-83.5885
chr18	43754998	-	Intron	NM_001008239,NM_145055	0.000329749	-83.4859
chr9	140083691	-	Exon	NM_003731	1.00363e-08	-83.4831
chr19	18981256	-	Exon	NM_001492,NM_021267	2.9245e-12	-83.4627
chr19	18981316	-	Exon	NM_001492,NM_021267	2.9245e-12	-83.4627
chr19	18981333	-	Exon	NM_001492,NM_021267	2.9245e-12	-83.4627
chr1	24387131	+	Intron	NM_152372	1.17701e-09	-83.4609
chr1	92136019	-	-	-	3.2972e-12	-83.4559
chr6	43211422	+	Exon	NM_032538	1.37626e-14	-83.4543
chr7	131012562	+	Promoter	NM_013255	3.2546e-13	-83.3656
chr6	43211463	+	Promoter	NM_032538	1.37626e-14	-83.3643
chr17	61821209	-	-	-	1.8369e-13	-83.3596
chr9	136696375	+	Intron	NM_001134398,NM_003371	4.57117e-17	-83.3482
chr15	45695496	-	Exon	NM_024063,NR_027635	4.89395e-18	-83.3386
chr15	45695511	-	Exon	NM_024063,NR_027635	4.89395e-18	-83.3386
chr10	130268613	-	-	-	2.89554e-30	-83.3333
chr21	47580031	+	-	-	3.58231e-16	-83.3333
chr7	182630	+	-	-	2.57012e-11	-83.3333
chr15	84696322	+	Intron	NM_207517	2.17556e-08	-83.3333
chr1	5900781	-	-	-	1.86028e-06	-83.3333
chr9	134115992	-	-	-	8.05409e-06	-83.3333
chrX	62135956	+	-	-	1.30318e-05	-83.3333
chr9	132437766	-	Intron	NM_016307	1.75066e-05	-83.3333
chr17	76481588	+	Intron	NM_173628	2.11516e-05	-83.3333
chr17	7077132	-	Exon	NM_001197216,NM_001671	7.66015e-05	-83.3333
chr5	179598077	+	Intron	NM_175062	9.17167e-05	-83.3333
chr9	137592767	-	-	-	0.000348611	-83.3333
chr3	9540801	-	Exon	NM_198560	0.000648459	-83.3333
chr6	43211376	+	Exon	NM_032538	1.88815e-14	-83.314
chr15	45695618	-	Exon	NM_024063,NR_027635	5.6935e-18	-83.2961
chr19	12856101	-	Intron	NM_004317	4.67562e-12	-83.1382
chr16	3230850	-	-	-	1.64641e-10	-83.1349
chr18	28991121	-	Exon	NM_001134453	6.82407e-43	-83.1013
chr17	1957257	-	-	-	2.03767e-07	-83.0882
chr16	763360	+	-	-	2.17826e-10	-83.0839
chr14	104011594	+	-	-	2.20712e-32	-83.0709
chr12	48550858	+	Promoter	NM_024095	1.63593e-28	-83.0019
chr6	22015165	-	Intron	NR_015410	2.26522e-19	-82.9982
chr17	67322881	+	Promoter	NM_172232	6.81377e-09	-82.9519
chr17	67322922	+	Promoter	NM_172232	6.81377e-09	-82.9519
chr2	131130019	-	Exon	NM_001142370,NM_014369	8.42857e-20	-82.9442
chr20	36776333	-	Intron	NM_004613,NM_198951	6.53276e-14	-82.9301
chr9	99482278	+	-	-	4.95117e-19	-82.9186
chr16	677517	+	Exon	NM_001172663,NM_001172664,NM_001172665,NM_001172666,NM_021168	4.40974e-15	-82.9114
chr19	17374921	-	Exon	NM_031941	1.803e-26	-82.8947
chr1	894949	-	Promoter	NM_015658	0.00396687	-82.8767
chr2	105023185	+	-	-	8.72663e-07	-82.8676
chr12	48550983	+	Promoter	NM_024095	2.81911e-27	-82.867
chr15	45695621	-	Exon	NM_024063,NR_027635	2.1376e-17	-82.8348
chr6	43211388	+	Exon	NM_032538	4.06365e-14	-82.8293
chr6	43211393	+	Exon	NM_032538	4.06365e-14	-82.8293
chr6	43211410	+	Exon	NM_032538	4.06365e-14	-82.8293
chr9	3527059	-	-	-	1.3115e-29	-82.8153
chr20	55986699	+	Intron	NR_039970	0.000189175	-82.8125
chr15	101564522	-	Intron	NM_024652	3.64919e-07	-82.8059
chr6	43211413	+	Exon	NM_032538	4.06365e-14	-82.7998
chr2	113234332	-	-	-	8.41149e-33	-82.7937
chr15	90602628	-	Intron	NM_198526	2.42785e-12	-82.7869
chr2	26197032	-	Intron	NM_002254	2.32974e-08	-82.7731
chr6	43211428	+	Exon	NM_032538	4.06365e-14	-82.7393
chr6	43211433	+	Exon	NM_032538	4.06365e-14	-82.7393
chr6	43211458	+	Promoter	NM_032538	4.06365e-14	-82.7393
chr1	2202848	+	Intron	NM_003036	2.48792e-15	-82.734
chr10	134512794	+	Intron	NM_005539	1.93675e-07	-82.6963
chr11	14666171	-	Exon	NM_000922	1.09908e-15	-82.6912
chr2	131130025	-	Exon	NM_001142370,NM_014369	8.42857e-20	-82.6825
chr2	131130054	-	Exon	NM_001142370,NM_014369	8.42857e-20	-82.6825
chr2	131130056	-	Exon	NM_001142370,NM_014369	8.42857e-20	-82.6825
chr2	131130183	-	Intron	NM_001142370,NM_014369	8.42857e-20	-82.6825
chr2	131130186	-	Intron	NM_001142370,NM_014369	8.42857e-20	-82.6825
chr2	131130200	-	Intron	NM_001142370,NM_014369	8.42857e-20	-82.6825
chr2	131130212	-	Intron	NM_001142370,NM_014369	8.42857e-20	-82.6825
chr19	35571936	-	Intron	NR_024562	8.54468e-27	-82.6446
chr15	45695537	-	Exon	NM_024063,NR_027635	8.5864e-16	-82.6363
chr7	2120093	+	Intron	NM_001013836,NM_001013837,NM_003550	2.3156e-05	-82.6087
chr11	114484767	+	-	-	1.07311e-13	-82.604
chr13	97389602	-	Intron	NM_153456	2.51463e-05	-82.5603
chr10	135017231	-	Intron	NM_152643	0.00112947	-82.5581
chr19	45874443	-	Promoter	NM_000400,NM_001130867	2.81198e-05	-82.5379
chr17	45791688	-	-	-	4.87641e-12	-82.5255
chr5	77986404	-	-	-	0.000226085	-82.5033
chr6	43211453	+	Promoter	NM_032538	1.14854e-13	-82.5
chr15	45695636	-	Exon	NM_024063,NR_027635	5.27782e-18	-82.4978
chr4	40752030	+	Exon	NM_024677	6.39353e-25	-82.4916
chr14	39424743	-	-	-	6.72672e-11	-82.4713
chr11	131559159	-	Intron	NM_001048209	0.000193416	-82.448
chr4	80698487	-	-	-	3.75336e-05	-82.4351
chr2	131130034	-	Exon	NM_001142370,NM_014369	8.42857e-20	-82.4207
chr21	46009968	+	Intron	NM_144991	1.23383e-27	-82.4081
chr7	106301390	-	Exon	NM_175884	7.11829e-06	-82.4032
chr6	43211416	+	Exon	NM_032538	4.06365e-14	-82.3933
chr9	3526925	-	Promoter	NM_002919,NM_134428	1.5639e-30	-82.369
chr12	48550873	+	Promoter	NM_024095	1.12208e-26	-82.3607
chr12	48550888	+	Promoter	NM_024095	1.12208e-26	-82.3607
chr12	48550900	+	Promoter	NM_024095	1.12208e-26	-82.3607
chr12	48551000	+	Promoter	NM_024095	1.12208e-26	-82.3607
chr12	48551027	+	Promoter	NM_024095	1.12208e-26	-82.3607
chr4	57458877	+	Intron	NM_001256475	5.08466e-13	-82.3221
chr11	1375330	+	-	-	4.79178e-16	-82.3077
chr17	67322900	+	Promoter	NM_172232	6.81377e-09	-82.2714
chr17	67322909	+	Promoter	NM_172232	6.81377e-09	-82.2714
chr17	67322948	+	Promoter	NM_172232	6.81377e-09	-82.2714
chr17	67322979	+	Promoter	NM_172232	6.81377e-09	-82.2714
chr17	67322981	+	Promoter	NM_172232	6.81377e-09	-82.2714
chr17	67322898	+	Promoter	NM_172232	2.41457e-08	-82.2714
chr18	62940146	-	-	-	1.02825e-11	-82.2465
chr16	86570687	+	Intron	NM_001159377,NM_001159378,NM_001159379,NM_001159380,NM_022764,NR_027489,NR_027490	9.76323e-17	-82.2373
chr1	209801424	-	Exon	NM_000228,NM_001017402,NM_001127641	2.27967e-19	-82.2368
chr9	139934423	+	-	-	2.20798e-06	-82.2314
chr1	36580734	+	-	-	2.55096e-05	-82.1705
chr19	11617021	+	Exon	NM_001142464,NM_001142465,NM_001243204,NM_016581	6.88415e-09	-82.1677
chr2	240041607	+	Intron	NM_006037	3.23325e-14	-82.1591
chr17	36898800	+	Intron	NM_007144	2.67862e-07	-82.1429
chrX	29226566	+	Intron	NM_014271	2.52788e-08	-82.1347
chrX	152805657	+	Intron	NM_001001344,NM_021949	6.32821e-37	-82.1188
chr13	79238580	-	-	-	7.32693e-18	-82.0988
chr17	67322957	+	Promoter	NM_172232	6.81377e-09	-82.0748
chr2	220500347	+	-	-	3.4958e-09	-82.0539
chr13	30070793	+	Intron	NM_001033602,NM_015233	5.0056e-10	-82.0175
chr8	29630936	+	-	-	2.24185e-07	-81.9882
chr17	67322912	+	Promoter	NM_172232	6.81377e-09	-81.9627
chr17	67322965	+	Promoter	NM_172232	6.81377e-09	-81.9627
chr15	64859954	-	Intron	NM_015042	2.49263e-06	-81.9444
chr9	136696295	+	Intron	NM_001134398,NM_003371	4.57118e-17	-81.9196
chr4	40752061	+	Exon	NM_024677	2.72459e-24	-81.9085
chr5	133161620	+	-	-	3.59634e-10	-81.8955
chr12	48550884	+	Promoter	NM_024095	1.12208e-26	-81.8934
chr2	131130032	-	Exon	NM_001142370,NM_014369	8.42857e-20	-81.8888
chr2	131130178	-	Intron	NM_001142370,NM_014369	8.42857e-20	-81.8888
chr4	40752080	+	Exon	NM_024677	2.72688e-24	-81.8803
chr19	33556102	+	Promoter	NM_033103	2.10149e-43	-81.8633
chr19	996235	-	-	-	1.57841e-26	-81.841
chr9	3527035	-	-	-	1.5639e-30	-81.8226
chr9	3526915	-	Promoter	NM_002919,NM_134428	1.5639e-30	-81.8226
chr2	131130023	-	Exon	NM_001142370,NM_014369	1.45077e-18	-81.8053
chr1	11561590	-	Exon	NM_020780	6.39215e-07	-81.7896
chr1	220851862	-	-	-	1.76495e-20	-81.7721
chr16	88537416	-	Intron	NM_153813	2.13166e-18	-81.7708
chr2	228336904	+	Exon	NM_001135187,NM_001135188,NM_001135189,NM_004504	1.0378e-05	-81.7659
chr2	228336907	+	Exon	NM_001135187,NM_001135188,NM_001135189,NM_004504	1.0378e-05	-81.7659
chr2	228336910	+	Exon	NM_001135187,NM_001135188,NM_001135189,NM_004504	1.0378e-05	-81.7659
chr2	228336919	+	Exon	NM_001135187,NM_001135188,NM_001135189,NM_004504	1.0378e-05	-81.7659
chr2	228336828	+	Promoter	NM_001135187,NM_001135188,NM_001135189,NM_004504	1.0378e-05	-81.7659
chr2	228336837	+	Promoter	NM_001135187,NM_001135188,NM_001135189,NM_004504	1.0378e-05	-81.7659
chr2	228336852	+	Exon	NR_049888	1.0378e-05	-81.7659
chr19	58571389	-	Exon	NM_003436	1.08824e-25	-81.7649
chr14	52646824	+	-	-	2.63403e-10	-81.7204
chr6	43211407	+	Exon	NM_032538	4.06365e-14	-81.7174
chr2	228336898	+	Exon	NM_001135187,NM_001135188,NM_001135189,NM_004504	1.11415e-05	-81.6727
chr12	48550979	+	Promoter	NM_024095	3.74375e-26	-81.6706
chr11	64687161	+	-	-	1.92352e-07	-81.6597
chr20	61159383	-	Intron	NM_178463	1.73184e-08	-81.6327
chr16	88980407	+	Intron	NM_175931	8.59311e-14	-81.6265
chr16	85529726	+	-	-	2.8756e-09	-81.624
chr4	40752037	+	Exon	NM_024677	2.74604e-24	-81.6211
chr4	40752056	+	Exon	NM_024677	2.74604e-24	-81.6211
chr4	40752065	+	Exon	NM_024677	2.74604e-24	-81.6211
chr4	40752078	+	Exon	NM_024677	2.74604e-24	-81.6211
chr4	40752092	+	Exon	NM_024677	2.74604e-24	-81.6211
chr13	23981633	+	Intron	NM_014363	1.90918e-06	-81.6196
chr4	40752067	+	Exon	NM_024677	6.39753e-24	-81.6079
chr4	40752119	+	Exon	NM_024677	6.39753e-24	-81.6079
chr4	40752053	+	Exon	NM_024677	2.75255e-24	-81.5912
chr4	40752082	+	Exon	NM_024677	2.75255e-24	-81.5912
chr7	157234246	-	-	-	9.23856e-09	-81.5789
chr15	26915433	+	Intron	NM_001191320	4.53051e-07	-81.5789
chr2	225626253	-	-	-	1.9359e-06	-81.5789
chr9	68410819	-	-	-	2.13095e-05	-81.5789
chr13	26617703	-	-	-	0.00421863	-81.5614
chr22	39686867	-	-	-	1.20465e-11	-81.5217
chr4	40752105	+	Exon	NM_024677	2.71504e-23	-81.502
chr8	27132059	+	-	-	2.52908e-24	-81.4867
chr11	23956566	-	-	-	5.69528e-13	-81.4867
chr3	50318319	+	Intron	NM_153215	0.000863299	-81.4733
chr9	117302733	+	-	-	1.4569e-06	-81.4547
chr17	75672665	-	-	-	1.41409e-41	-81.4335
chr1	23912503	-	-	-	2.723e-10	-81.391
chr16	1094797	-	-	-	7.99342e-12	-81.3731
chr19	39582840	+	Intron	NM_001004318	0.000201508	-81.3698
chr2	121200581	+	-	-	3.48808e-17	-81.3656
chr21	37673416	-	-	-	4.5008e-06	-81.3638
chr11	45943237	+	Promoter	NM_152312	6.20517e-12	-81.3613
chr19	519258	-	Exon	NM_033513	1.28208e-30	-81.3388
chr4	40752125	+	Exon	NM_024677	2.80423e-24	-81.3338
chr11	1055301	-	-	-	1.72167e-13	-81.3333
chr2	95996413	+	Intron	NM_013434	0.00227263	-81.3333
chr15	76640006	-	-	-	2.2153e-15	-81.3253
chr9	136075164	-	-	-	6.7698e-26	-81.3043
chr19	18980100	-	Exon	NM_001492,NM_021267	1.06552e-09	-81.2893
chr9	128815809	-	-	-	1.94112e-30	-81.2893
chr9	3526935	-	Promoter	NM_002919,NM_134428	1.56391e-30	-81.2731
chr17	79433737	+	-	-	2.23478e-08	-81.25
chr21	24464167	-	-	-	0.00282626	-81.25
chr17	46986327	+	Promoter	NM_023079	3.70584e-13	-81.235
chr16	6069793	+	Promoter	NM_001142333,NM_018723	3.20294e-15	-81.2264
chr2	91965714	-	-	-	0.00373653	-81.2084
chr14	105636673	+	-	-	3.28116e-08	-81.1905
chr11	131781253	+	Exon	NM_001144058,NM_001144059,NM_016522	2.94293e-11	-81.162
chr1	203495841	+	-	-	1.53634e-11	-81.159
chr21	33113302	+	-	-	1.5554e-11	-81.1275
chr9	3526928	-	Promoter	NM_002919,NM_134428	1.3115e-29	-81.0873
chr11	134265067	-	Intron	NM_018644,NM_054025	7.28932e-05	-81.0811
chr2	228336901	+	Exon	NM_001135187,NM_001135188,NM_001135189,NM_004504	3.07779e-05	-81.0714
chr14	102956967	-	Intron	NM_014844	9.7149e-22	-81.0665
chr2	228336887	+	Exon	NR_049888	1.56382e-05	-81.0516
chr17	75954924	+	-	-	1.41914e-11	-81.0434
chr13	113814290	-	Intron	NM_003891	7.94274e-17	-81.0406
chr14	23834995	+	Promoter	NM_005864,NM_032459	6.3515e-08	-81.0185
chr19	51634699	+	Intron	NM_001198558	0.000368591	-81.0173
chr7	2935115	+	-	-	4.48176e-09	-81.0078
chr4	40752100	+	Exon	NM_024677	3.06192e-24	-80.9796
chr3	75505856	+	-	-	3.3129e-06	-80.9524
chr12	49076495	-	Promoter	NM_017822	2.91503e-33	-80.9134
chr8	145050052	-	Promoter	NM_000445	5.61011e-15	-80.9091
chr19	45200531	-	-	-	6.34678e-08	-80.8978
chr9	136075149	-	-	-	6.79683e-26	-80.8696
chr7	152714640	-	-	-	4.36699e-14	-80.8489
chr11	365471	+	-	-	1.50315e-06	-80.8405
chr16	85558232	+	-	-	3.99793e-16	-80.7864
chr5	20296455	-	-	-	1.65841e-06	-80.7692
chr13	111306375	+	Intron	NM_024537	5.87227e-06	-80.7692
chr10	105043958	-	Intron	NM_032727	3.58887e-05	-80.7097
chr17	6945433	-	Exon	NM_153357	0.00243626	-80.695
chr2	218802216	-	Intron	NM_022648	2.57691e-13	-80.6792
chr16	50099606	+	Promoter	NM_182922	3.79904e-07	-80.6548
chr17	13505484	+	Promoter	NM_006042	1.12319e-06	-80.6502
chr11	2037124	+	-	-	5.10003e-10	-80.6122
chr10	131667040	-	Intron	NM_001005463	3.49374e-06	-80.6122
chr10	38738086	-	Exon	NR_024497	1.48633e-11	-80.5627
chr7	66483664	-	Intron	NM_018264	3.31762e-05	-80.5556
chr14	23835014	+	Promoter	NM_005864,NM_032459	9.53995e-08	-80.4977
chr14	23835123	+	Promoter	NM_005864,NM_032459	9.53995e-08	-80.4977
chr4	41742563	-	-	-	2.78372e-15	-80.497
chr7	131012596	+	Exon	NM_013255	3.17766e-12	-80.4813
chr7	131012663	+	Exon	NM_013255	3.17766e-12	-80.4813
chr7	131012670	+	Exon	NM_013255	3.17766e-12	-80.4813
chr7	131012687	+	Exon	NM_013255	3.17766e-12	-80.4813
chr7	131012691	+	Exon	NM_013255	3.17766e-12	-80.4813
chr7	131012571	+	Promoter	NM_013255	3.17766e-12	-80.4813
chr7	131012574	+	Promoter	NM_013255	3.17766e-12	-80.4813
chr2	66653766	-	Exon	NR_046438	2.20654e-05	-80.4762
chr14	23835157	+	Promoter	NM_005864,NM_032459	9.53995e-08	-80.4761
chr8	145753332	+	Promoter	NM_001024678	2.03374e-14	-80.4688
chr22	16217358	+	-	-	6.7555e-08	-80.4656
chr7	131012679	+	Exon	NM_013255	3.51051e-12	-80.4505
chr22	51047150	+	Intron	NM_012324,NM_016431	1.17048e-11	-80.4348
chr9	138001846	-	Intron	NM_014279	6.75698e-17	-80.4166
chr18	77271146	-	Intron	NM_172387	9.98529e-15	-80.3956
chr4	1492415	-	-	-	1.00744e-16	-80.3692
chr1	1168651	+	Exon	NM_080605	7.86598e-05	-80.3571
chr8	10149973	-	Intron	NM_001135671,NM_001199729,NM_012331	7.81098e-10	-80.3371
chrX	39676248	-	-	-	0.000145502	-80.2615
chr15	75021171	+	-	-	4.25653e-15	-80.2469
chr9	133366720	-	Intron	NM_000050,NM_054012	0.000242602	-80.2326
chr7	131891710	+	Intron	NM_020911	9.96662e-08	-80.2083
chr19	10921795	-	Intron	NM_001005362,NM_004945	7.80556e-05	-80.2083
chr1	29461327	+	-	-	3.63499e-17	-80.2008
chr1	9690036	+	-	-	1.99723e-08	-80.137
chr14	23316195	+	Exon	NM_004995	2.78928e-08	-80.1289
chr19	45683153	+	Exon	NM_212550	6.51538e-14	-80.0994
chr16	73091612	-	Promoter	NM_001164766	1.49589e-38	-80.0861
chr17	43248859	+	-	-	3.53609e-09	-80.0769
chrX	7895575	+	Promoter	NM_001142389,NM_001172672	3.41904e-15	-80.0416
chr19	40904451	+	Exon	NM_020956	9.08525e-07	-80.0275
chr17	45924683	-	Exon	NM_001258248,NM_199262	9.66097e-11	-80.0075
chr10	15017085	+	-	-	2.45503e-09	-80
chr10	114713055	-	Intron	NM_001198530	3.96394e-05	-80
chr7	47431893	-	Intron	NM_022748	0.000124253	-80
chr19	56180368	-	Intron	NM_001012478,NM_007279	0.000227602	-80
chr7	101961890	+	Exon	NM_020979	7.48645e-12	-79.9961
chr16	30096220	-	-	-	6.39833e-05	-79.9771
chr12	108591803	-	Intron	NM_014653	0.000104057	-79.9762
chr8	144635388	-	Promoter	NM_001166237	1.73237e-05	-79.9484
chr2	157518672	-	-	-	5.75405e-11	-79.9296
chr6	43211385	+	Exon	NM_032538	4.46323e-13	-79.9253
chr8	125856235	-	-	-	3.26978e-05	-79.9091
chr5	12795386	-	Intron	NR_033383	3.43141e-23	-79.8969
chr14	24045134	+	Exon	NM_001146028,NM_032452	6.41934e-22	-79.8526
chr17	20744720	-	-	-	7.87687e-07	-79.7863
chr15	68637707	-	Intron	NM_001004439	1.90555e-07	-79.7824
chr11	31826018	+	Intron	NM_000280,NM_001127612,NM_001258462,NM_001258463,NM_001258464,NM_001258465,NM_001604	5.79707e-15	-79.7418
chr8	38965513	+	Promoter	NM_145004	2.63247e-10	-79.7168
chr7	137831187	+	-	-	3.62495e-10	-79.7089
chr1	17313280	-	Intron	NM_001141974	1.39491e-19	-79.7065
chr7	131012684	+	Exon	NM_013255	3.17769e-12	-79.6749
chr1	895122	-	Promoter	NM_015658	0.00182057	-79.6655
chr12	49076392	-	Promoter	NM_017822	2.91503e-33	-79.6634
chr12	49076492	-	Promoter	NM_017822	2.91503e-33	-79.6634
chr2	481521	-	-	-	2.60663e-15	-79.661
chr9	139428594	-	Intron	NM_017617	1.52732e-06	-79.6552
chr13	21699910	+	-	-	0.00205539	-79.6537
chr19	11603862	+	Intron	NM_138783	1.733e-27	-79.6471
chr19	2537243	-	Intron	NM_052847	7.61275e-08	-79.6075
chr9	136075133	-	-	-	4.4406e-24	-79.5802
chr11	118481495	+	Intron	NM_015157	7.9659e-08	-79.5536
chr16	1170669	+	-	-	5.94716e-14	-79.4633
chr12	49076404	-	Promoter	NM_017822	6.45361e-33	-79.4524
chr10	125751975	-	-	-	6.52551e-20	-79.4467
chr18	55096103	+	-	-	1.21038e-22	-79.4258
chr18	55096108	+	-	-	1.21038e-22	-79.4258
chr18	55096114	+	-	-	1.21038e-22	-79.4258
chr18	55096117	+	-	-	1.21038e-22	-79.4258
chr18	55096121	+	-	-	1.21038e-22	-79.4258
chr18	55096138	+	-	-	1.21038e-22	-79.4258
chr17	22005567	-	-	-	0.000281172	-79.4118
chr14	23835143	+	Promoter	NM_005864,NM_032459	9.53995e-08	-79.4107
chr22	32599400	-	Exon	NM_001098527	1.48016e-32	-79.3939
chr20	62318466	-	Intron	NM_016434,NM_032957,NR_037882	3.09275e-11	-79.386
chr2	99533663	-	Intron	NM_207362	9.05834e-22	-79.376
chr14	94419836	+	Exon	NM_001202429,NM_016150	3.55672e-11	-79.3651
chr17	30244405	+	-	-	2.65697e-17	-79.3459
chr15	74325745	+	Exon	NM_002675,NM_033238,NM_033239,NM_033240,NM_033249,NM_033250	6.18181e-16	-79.3446
chr17	1390715	-	Intron	NM_033375	2.24016e-08	-79.329
chr3	127175486	-	-	-	6.9781e-08	-79.3269
chr19	39618070	-	Intron	NM_001014832,NM_001014834	0.000861111	-79.3262
chr10	134567300	+	Intron	NM_005539	2.20338e-18	-79.3217
chr9	139259061	+	Promoter	NM_001080849	0.00011549	-79.3117
chr4	4846086	-	-	-	0.00482094	-79.3103
chr18	55096123	+	-	-	1.21038e-22	-79.3016
chr15	27281557	+	Intron	NM_001270873,NM_033223	0.00226216	-79.2928
chr2	171070073	-	Intron	NM_001083615,NM_138995,NR_045682,NR_045683,NR_045684	3.94465e-17	-79.2705
chr1	191904716	-	-	-	2.70205e-07	-79.2614
chr11	76351689	-	-	-	6.55147e-16	-79.2539
chr7	98030278	-	Exon	NM_018842	4.58321e-07	-79.2517
chr2	242664986	-	Exon	NM_032329	2.59702e-08	-79.25
chr7	36583846	+	Intron	NM_001177506,NM_001177507,NM_001637	1.79265e-06	-79.2438
chr12	49076394	-	Promoter	NM_017822	2.15986e-32	-79.2414
chr19	45418846	+	Promoter	NM_001645	1.64796e-06	-79.2376
chr11	133741837	-	-	-	1.62679e-20	-79.2149
chr2	66653741	-	Exon	NR_046438	2.20654e-05	-79.1859
chr2	66653892	-	Exon	NR_046438	2.20654e-05	-79.1859
chr2	66653894	-	Exon	NR_046438	2.20654e-05	-79.1859
chr2	66653901	-	Exon	NR_046438	2.20654e-05	-79.1859
chr19	3375386	-	Intron	NM_001245005,NM_205843	1.52795e-16	-79.1858
chr12	49076522	-	Promoter	NM_017822	1.54959e-33	-79.1853
chr9	138238493	-	-	-	1.67772e-12	-79.1764
chr10	133516032	+	-	-	1.0217e-08	-79.1667
chr4	11374662	+	-	-	8.79835e-05	-79.1667
chr2	8469746	+	-	-	4.94961e-08	-79.1444
chr22	31674508	-	Exon	NM_005569,NM_016733	1.81024e-13	-79.1212
chr2	73511980	-	-	-	9.9889e-32	-79.1095
chr2	73512124	-	-	-	9.9889e-32	-79.1095
chr2	73512126	-	-	-	9.9889e-32	-79.1095
chrX	47050340	-	Exon	NM_153280	1.18558e-18	-79.0965
chr18	55096093	+	-	-	4.22465e-22	-79.0661
chr6	88876670	+	Promoter	NM_001160226,NM_001160258,NM_001160259,NM_016083	1.16295e-13	-79.0618
chr22	49703061	+	-	-	8.74619e-10	-79.0476
chr19	55758742	-	Intron	NM_014931	4.74839e-09	-79.0426
chr19	10361303	-	-	-	1.73812e-09	-79.0323
chr22	38458551	-	Intron	NM_001039583,NM_001039584,NM_012407	0.000586232	-79.0323
chr7	54835230	+	-	-	2.88769e-10	-79.0305
chr11	70397593	-	Intron	NM_012309,NM_133266	2.42785e-09	-78.9815
chr8	10283199	+	Intron	NM_001135670,NM_001135671,NM_001199729,NM_012331	4.88005e-11	-78.9693
chr2	66653881	-	Exon	NR_046438	2.59376e-05	-78.9536
chr5	114505606	-	Intron	NM_018700	1.009e-16	-78.9517
chr16	84983416	-	-	-	4.63001e-10	-78.9474
chr8	144884434	+	Intron	NM_015356,NM_182706	0.0012248	-78.9474
chr10	105548565	-	Intron	NM_014631	0.000226636	-78.9391
chr10	18875435	+	Intron	NM_182543	2.1788e-28	-78.9234
chr2	118617464	-	-	-	2.15798e-13	-78.9232
chr3	138725275	-	Promoter	NM_001134659	6.82564e-08	-78.92
chr3	121712239	-	Exon	NM_001199799,NM_001199800,NM_175924	0.000735835	-78.908
chr18	50827563	-	Intron	NM_005215	2.56859e-07	-78.871
chr18	60697449	+	-	-	3.82352e-05	-78.8707
chr1	6360736	-	Intron	NM_007274,NM_181864,NM_181865,NM_181866	8.06439e-08	-78.8695
chr12	96454866	-	-	-	7.32648e-07	-78.8449
chr14	94640482	+	Promoter	NM_020958,NM_058237	7.44499e-11	-78.8043
chr1	34630001	-	Intron	NM_052896	8.851e-11	-78.7915
chr17	1184273	-	Intron	NM_172367	1.58286e-10	-78.75
chr9	124933614	-	Intron	NM_198469	2.66504e-07	-78.7478
chr7	134001622	-	Exon	NM_032826	1.87653e-15	-78.6979
chr2	73511970	-	-	-	9.9889e-32	-78.6894
chr9	112889646	-	Intron	NM_007203,NM_147150	4.1576e-08	-78.6723
chr6	90319317	-	Intron	NM_001242814	1.82926e-27	-78.6531
chr19	7855636	-	Exon	NR_002931	1.00474e-07	-78.6523
chr5	1655462	-	-	-	1.12391e-12	-78.6282
chr5	114505578	-	Intron	NM_018700	1.83841e-16	-78.6138
chr5	114505590	-	Intron	NM_018700	1.83841e-16	-78.6138
chr5	114505619	-	Intron	NM_018700	1.83841e-16	-78.6138
chr5	114505622	-	Intron	NM_018700	1.83841e-16	-78.6138
chr5	114505624	-	Intron	NM_018700	1.83841e-16	-78.6138
chr5	114505712	-	Intron	NM_018700	1.83841e-16	-78.6138
chr21	46010013	+	Intron	NM_144991	7.56729e-23	-78.5916
chr18	28991220	-	Exon	NM_001134453	2.26472e-33	-78.5764
chr12	8388009	-	Intron	NR_024254	1.24378e-09	-78.5714
chr9	94896650	+	Intron	NR_015444	1.31101e-08	-78.5714
chr5	126018323	-	-	-	8.22383e-05	-78.5714
chr14	104859246	+	-	-	5.02199e-08	-78.5427
chr2	73511998	-	-	-	6.64825e-30	-78.5143
chr1	53214799	+	Intron	NM_024646	1.63453e-06	-78.5043
chr22	21081726	+	-	-	7.09956e-08	-78.5024
chr1	11561569	-	Exon	NM_020780	6.49865e-10	-78.4884
chr2	106016168	+	Promoter	NM_001039492	7.43306e-09	-78.4468
chr6	153428324	+	Intron	NM_012419	5.35445e-36	-78.4408
chr22	37722106	+	-	-	2.9842e-12	-78.4267
chr19	17218616	-	Intron	NM_001130065,NM_004145	2.2813e-16	-78.4226
chr1	217887987	-	Intron	NM_138796	1.16792e-07	-78.405
chr5	114505599	-	Intron	NM_018700	1.54401e-16	-78.3831
chr11	73425563	+	Intron	NM_001243719,NM_002869,NM_198896	1.04718e-10	-78.3562
chr7	138691375	-	-	-	9.08238e-09	-78.3448
chr10	134567277	+	Intron	NM_005539	2.49387e-18	-78.3421
chrY	14253022	-	-	-	0.000548242	-78.3333
chr19	59084941	-	Exon	NM_001267033,NM_198055	1.81238e-09	-78.2828
chr2	171785740	-	Exon	NM_015530	2.8496e-22	-78.2815
chr2	73511974	-	-	-	9.9889e-32	-78.2814
chr20	60952236	+	-	-	2.14462e-15	-78.2795
chr19	955428	-	Intron	NM_005224	1.11439e-24	-78.2775
chr9	136180055	-	-	-	9.46123e-14	-78.2609
chr2	220507547	+	-	-	4.63756e-29	-78.2546
chr2	220507553	+	-	-	4.63756e-29	-78.2546
chr9	139477902	-	-	-	7.09922e-16	-78.2407
chr9	34072028	-	-	-	3.56724e-13	-78.2385
chr22	50731833	-	Intron	NM_012401	2.77938e-07	-78.2375
chr19	11617055	+	Exon	NM_001142464,NM_001142465,NM_001243204,NM_016581	6.68662e-09	-78.2254
chr2	73512003	-	-	-	9.9889e-32	-78.2161
chr7	150677126	-	-	-	1.20622e-17	-78.2071
chr7	101928585	-	Promoter	NM_020979	3.90212e-05	-78.2051
chr15	75527489	+	-	-	2.79541e-15	-78.14
chr5	114505692	-	Intron	NM_018700	1.83841e-16	-78.1293
chr5	114505699	-	Intron	NM_018700	1.83841e-16	-78.1293
chr16	84432434	-	Intron	NM_014861	5.23288e-09	-78.125
chr1	3293947	-	Intron	NM_022114,NM_199454	0.00361701	-78.125
chr13	112827283	+	-	-	8.93276e-09	-78.096
chr12	34495428	+	-	-	1.05099e-22	-78.0728
chr1	34630103	-	Intron	NM_052896	1.29189e-10	-78.0442
chr7	533594	-	-	-	6.15336e-11	-78.0421
chr13	27218703	+	Intron	NM_006646	2.19111e-16	-78.0018
chr8	142237984	-	Promoter	NM_001080431	8.20941e-10	-77.9965
chr16	29937319	+	Promoter	NM_178863	1.11426e-05	-77.9832
chr11	115581838	+	-	-	1.93836e-20	-77.98
chr1	34630024	-	Intron	NM_052896	1.55505e-10	-77.9705
chr11	115581849	+	-	-	1.94378e-20	-77.9588
chr16	1575479	+	Intron	NM_014714	4.5538e-15	-77.9412
chr18	55761752	+	Intron	NM_001144967,NM_001243960,NM_015277	0.000190095	-77.9167
chr22	47480240	+	Intron	NM_014346	3.88946e-15	-77.8736
chr7	98030245	-	Exon	NM_018842	1.62698e-06	-77.8628
chr7	98030250	-	Exon	NM_018842	1.62698e-06	-77.8628
chr7	98030252	-	Exon	NM_018842	1.62698e-06	-77.8628
chr7	98030274	-	Exon	NM_018842	1.62698e-06	-77.8628
chr7	98030281	-	Exon	NM_018842	1.62698e-06	-77.8628
chr7	98030284	-	Exon	NM_018842	1.62698e-06	-77.8628
chr7	98030290	-	Exon	NM_018842	1.62698e-06	-77.8628
chr7	98030343	-	Exon	NM_018842	1.62698e-06	-77.8628
chr7	98030367	-	Exon	NM_018842	1.62698e-06	-77.8628
chr7	98030385	-	Exon	NM_018842	1.62698e-06	-77.8628
chr7	134001594	-	Exon	NM_032826	2.68988e-15	-77.8348
chr7	134001609	-	Exon	NM_032826	2.68988e-15	-77.8348
chr2	220507489	+	-	-	6.30667e-29	-77.8208
chr20	30135013	-	Promoter	NR_003677	6.20261e-07	-77.8061
chr17	80188480	-	Intron	NM_004207	2.73476e-11	-77.8024
chr14	39839791	+	-	-	7.80076e-05	-77.795
chr12	49735570	-	-	-	2.06822e-06	-77.7891
chr9	137524602	+	-	-	5.10323e-08	-77.7778
chr19	1584566	+	Exon	NM_003926	1.64589e-05	-77.7778
chr22	19138192	-	Promoter	NM_005315	1.46827e-14	-77.7778
chr12	49735721	-	-	-	2.06822e-06	-77.7586
chr7	16793745	+	Promoter	NM_014399	6.45386e-25	-77.7567
chr7	16793755	+	Promoter	NM_014399	6.45386e-25	-77.7567
chr7	1283790	+	-	-	1.79286e-05	-77.7549
chr7	16793736	+	Promoter	NM_014399	7.34881e-25	-77.7295
chr4	57458918	+	Intron	NM_001256475	5.55485e-15	-77.7273
chr3	13636624	-	Intron	NM_001004019,NM_001165035,NM_001998	6.02587e-05	-77.6923
chr5	99406252	-	-	-	0.00110338	-77.6768
chr17	42385526	-	Promoter	NM_001144825,NM_001144826,NM_006695	8.41554e-06	-77.6735
chr16	936984	-	Intron	NM_022773,NR_033645,NR_033646	6.92245e-11	-77.6481
chr7	16793612	+	Exon	NM_014399	7.65645e-25	-77.6416
chr6	155136287	+	Intron	NM_014892	7.30275e-26	-77.6208
chr2	170355171	+	Intron	NM_152384	3.08202e-09	-77.6064
chr3	8596012	-	Intron	NM_014583	1.06912e-14	-77.6018
chr4	183161346	+	-	-	1.75215e-06	-77.5886
chr5	170875263	+	Intron	NM_003862	2.79415e-09	-77.5862
chr9	94461511	-	-	-	0.00293901	-77.5862
chr22	44805959	-	-	-	0.00416107	-77.5862
chr5	39707098	-	-	-	0.000181338	-77.5613
chr4	579292	-	-	-	1.37347e-05	-77.5493
chr1	44777115	+	Intron	NM_024066	3.47773e-08	-77.5219
chr8	22872189	+	Intron	NM_001160036,NM_001160037,NM_015178	5.52002e-20	-77.5194
chr1	11068855	+	-	-	1.5784e-22	-77.5
chr16	322846	-	Intron	NM_003834,NM_183337	3.02151e-19	-77.5
chr8	47150324	+	-	-	2.91304e-06	-77.5
chr5	180058884	+	Intron	NM_002020,NM_182925	0.00455396	-77.4779
chr14	72044921	+	Intron	NM_015556	1.96239e-05	-77.4714
chr17	48165153	-	Exon	NM_002204,NM_005501	2.72184e-08	-77.4704
chr12	110222041	-	-	-	0.000205344	-77.4633
chr7	134001733	-	Exon	NM_032826	2.68988e-15	-77.4514
chr17	41720537	+	Intron	NM_013999	6.942e-13	-77.451
chr12	8388017	-	Intron	NR_024254	1.24449e-09	-77.4275
chr7	16793610	+	Exon	NM_014399	1.11329e-24	-77.4166
chr1	886636	-	-	-	1.74196e-09	-77.4045
chr15	90209326	+	-	-	9.77682e-14	-77.4032
chr11	80410637	+	-	-	2.96708e-23	-77.3849
chr11	14666096	-	Exon	NM_000922	4.62144e-21	-77.3746
chr19	10655369	+	Promoter	NM_032885	3.78785e-41	-77.369
chr18	38703969	-	-	-	4.84749e-17	-77.3381
chr7	16793757	+	Promoter	NM_014399	2.86639e-24	-77.3366
chr3	195596239	-	Intron	NM_005781	5.16085e-12	-77.3333
chr11	115581816	+	-	-	1.24167e-20	-77.3297
chrX	130037175	+	Exon	NM_006375,NM_182314	2.21729e-11	-77.3294
chr9	116998914	-	-	-	3.90682e-06	-77.2935
chr9	140008325	-	Exon	NM_013379	1.67275e-10	-77.2834
chr11	63803882	+	Intron	NM_014067	1.53049e-07	-77.2834
chr16	1096719	+	-	-	1.95476e-07	-77.2805
chrX	58294385	-	-	-	5.21637e-08	-77.2727
chr19	14529908	+	Promoter	NM_005804,NR_046366	2.95978e-07	-77.2727
chr19	14529746	+	Exon	NR_038336	2.95978e-07	-77.2727
chr19	14529771	+	Exon	NR_038336	2.95978e-07	-77.2727
chr19	14529867	+	Exon	NR_038336	2.95978e-07	-77.2727
chr19	14529874	+	Exon	NR_038336	2.95978e-07	-77.2727
chr19	14529876	+	Exon	NR_038336	2.95978e-07	-77.2727
chr19	14529878	+	Exon	NR_038336	2.95978e-07	-77.2727
chr19	14529884	+	Exon	NR_038336	2.95978e-07	-77.2727
chr19	14529902	+	Exon	NR_038336	2.95978e-07	-77.2727
chr19	14529774	+	Exon	NR_038336	2.95978e-07	-77.2727
chr19	14529776	+	Exon	NR_038336	2.95978e-07	-77.2727
chr10	83370654	+	-	-	1.16548e-08	-77.2647
chr5	114505616	-	Intron	NM_018700	7.57462e-15	-77.2625
chr2	208635466	-	-	-	4.79135e-06	-77.2549
chr5	2324687	+	-	-	5.88523e-07	-77.2384
chr16	87408768	+	Intron	NR_024568	1.31729e-10	-77.1823
chr11	63835095	-	Intron	NM_014067	0.000212501	-77.1792
chr17	45924716	-	Exon	NM_001258248,NM_199262	5.06027e-12	-77.1709
chr11	118972115	-	Promoter	NM_001382	2.156e-13	-77.1584
chr16	57496734	-	Promoter	NM_032940	4.01074e-05	-77.1562
chr17	18026503	-	Intron	NM_016239	8.20108e-16	-77.1429
chr9	139262221	-	Exon	NM_052813,NM_052814	1.46372e-05	-77.1429
chr1	22499050	-	-	-	7.22446e-20	-77.1405
chr6	144441673	-	-	-	2.60748e-06	-77.1368
chr7	134001721	-	Exon	NM_032826	5.76209e-15	-77.1334
chr10	11911745	-	Exon	NM_153256	2.56166e-18	-77.1301
chr1	228345325	-	Intron	NM_020435	3.2281e-20	-77.127
chr7	134001695	-	Exon	NM_032826	5.76209e-15	-77.1256
chr1	34630076	-	Intron	NM_052896	1.38307e-09	-77.1242
chr16	895401	+	-	-	3.80593e-15	-77.1165
chr21	35718082	-	-	-	8.11064e-10	-77.1117
chr16	30968848	-	Exon	NM_014712	1.45469e-10	-77.1064
chr4	62830876	+	-	-	9.36066e-19	-77.1032
chr7	2704775	+	-	-	5.75661e-06	-77.1028
chr22	39152783	-	Promoter	NM_001199579,NM_015374	1.6728e-13	-77.0971
chr2	238065715	-	-	-	3.30238e-34	-77.0967
chr7	150069597	+	Exon	NM_001099695,NM_001099696,NM_013400	5.382e-22	-77.0958
chr17	73538988	-	Intron	NM_001015002,NM_001031803,NM_004524	0.00170925	-77.0896
chr5	9910103	+	-	-	3.41906e-09	-77.0721
chr4	2819349	+	Promoter	NM_001145856	2.42034e-50	-77.0657
chr16	34809209	+	-	-	0.00166721	-77.0588
chr7	3141392	-	-	-	3.69501e-06	-77.0539
chr7	101158080	-	Intron	NM_133457	6.57086e-14	-77.038
chr16	88112325	-	-	-	7.63836e-06	-77.0339
chr10	126897602	-	-	-	7.39773e-08	-77.0121
chr16	4423614	-	Intron	NM_138440	2.53117e-06	-76.9737
chr9	139396916	-	Exon	NM_017617	7.13724e-10	-76.9663
chr6	36714160	+	-	-	0.000204946	-76.9523
chr4	178152395	+	-	-	9.25137e-14	-76.9304
chr19	951706	+	Intron	NM_005224	1.01788e-24	-76.9279
chr10	24544882	-	Intron	NM_001098500,NM_001098501,NM_019590	2.56562e-08	-76.911
chrX	66827146	-	Intron	NM_001011645	0.00418707	-76.9105
chr16	30968860	-	Exon	NM_014712	1.45469e-10	-76.877
chr16	30968949	-	Exon	NM_014712	1.45469e-10	-76.877
chr1	62120195	-	Exon	NR_073400	0.000525321	-76.8687
chr3	195902228	-	-	-	2.73172e-05	-76.8681
chr17	35290431	+	-	-	1.32412e-12	-76.8667
chr7	1879228	+	Intron	NM_001013836,NM_001013837,NM_003550	1.14273e-05	-76.864
chr2	137517153	-	-	-	3.36804e-07	-76.8619
chr17	26605897	+	Intron	NR_028334	1.68894e-05	-76.8478
chr2	242764038	-	-	-	4.03588e-11	-76.8437
chr7	98030352	-	Exon	NM_018842	1.62698e-06	-76.8424
chr10	75497381	-	-	-	1.52552e-07	-76.8369
chr7	158363636	-	Intron	NM_130842	1.86648e-34	-76.8366
chr19	14529735	+	Promoter	NM_005804,NR_046366	2.95978e-07	-76.8229
chr4	57458884	+	Intron	NM_001256475	2.02586e-14	-76.8216
chr17	79304801	+	Promoter	NM_178520	5.95495e-09	-76.8195
chr16	30968944	-	Exon	NM_014712	1.45469e-10	-76.8006
chr16	12834158	+	Intron	NM_018340	3.59139e-16	-76.792
chr18	72540228	-	Intron	NM_001146189,NM_017757	2.97257e-07	-76.7857
chr15	89745018	+	Exon	NM_007011,NM_152924	2.82775e-07	-76.7766
chr4	184826539	+	Exon	NM_020225	7.35264e-16	-76.7639
chr10	115821565	+	-	-	0.00284869	-76.7549
chr17	80061111	-	Intron	NM_198082	4.60958e-12	-76.7531
chr9	140008331	-	Exon	NM_013379	1.67275e-10	-76.7515
chr10	94482738	-	-	-	2.56199e-11	-76.7416
chr11	118971949	-	Promoter	NM_001382	3.8565e-13	-76.7236
chr5	17275957	+	Exon	NM_001271606,NM_006317	5.52334e-06	-76.7184
chr22	36506829	-	-	-	3.56013e-06	-76.7162
chr5	179223314	+	Exon	NM_145867	0.00215213	-76.7136
chr19	17419678	+	Promoter	NM_024050	8.94578e-07	-76.6979
chr9	116450233	+	-	-	1.88345e-05	-76.6977
chr9	116450241	+	-	-	1.88345e-05	-76.6977
chr9	116450250	+	-	-	1.88345e-05	-76.6977
chr9	116450324	+	-	-	1.88345e-05	-76.6977
chr9	116450328	+	-	-	1.88345e-05	-76.6977
chr4	6665846	+	-	-	2.90946e-18	-76.6922
chrX	18646662	+	Exon	NM_001037343,NM_003159	5.3014e-16	-76.6691
chr16	30968920	-	Exon	NM_014712	1.45469e-10	-76.6476
chr1	161409883	+	-	-	1.88057e-08	-76.6454
chr7	134001604	-	Exon	NM_032826	6.47207e-14	-76.6302
chr7	134001729	-	Exon	NM_032826	6.47207e-14	-76.6302
chr1	23830203	+	-	-	0.000122909	-76.6286
chr7	134001707	-	Exon	NM_032826	6.47207e-14	-76.625
chr16	30968923	-	Exon	NM_014712	1.45469e-10	-76.6232
chr7	16793573	+	Exon	NM_014399	4.52194e-23	-76.6185
chr19	51171708	+	Exon	NM_016148	1.26424e-09	-76.6129
chr20	61323721	-	-	-	3.46833e-05	-76.6106
chr7	150069599	+	Exon	NM_001099695,NM_001099696,NM_013400	1.13863e-20	-76.6065
chr10	3121222	-	Intron	NM_002627	1.52831e-08	-76.5942
chr10	79337102	-	Intron	NM_001271518	1.57591e-18	-76.5924
chr18	56483807	+	-	-	2.41397e-32	-76.5678
chr9	126088817	-	-	-	0.000548579	-76.5595
chr6	88876636	+	Promoter	NM_001160226,NM_001160258,NM_001160259,NM_016083	1.85776e-11	-76.549
chr12	132698813	+	Intron	NM_001122636	7.24519e-26	-76.5385
chr17	46213828	+	Intron	NM_001075099,NM_003726	6.80002e-05	-76.5306
chr7	97664751	+	-	-	4.55308e-23	-76.5228
chr11	35137387	-	-	-	1.82791e-05	-76.5152
chr16	29954562	-	-	-	9.85183e-11	-76.5121
chr4	128544406	-	-	-	9.91948e-10	-76.5105
chr8	145123754	-	-	-	3.1416e-06	-76.5
chr16	31766903	+	Intron	NM_001130913	6.66157e-06	-76.4706
chr7	47420014	+	Intron	NM_022748	8.5641e-08	-76.4423
chr3	9664279	+	-	-	1.59664e-11	-76.4368
chr9	137981447	+	Intron	NM_006334,NM_014279	3.28948e-06	-76.413
chr12	125388731	-	-	-	1.10576e-07	-76.4081
chr7	134001589	-	Exon	NM_032826	2.68988e-15	-76.4062
chr17	73618028	-	-	-	1.95698e-07	-76.403
chr16	30968939	-	Exon	NM_014712	1.45469e-10	-76.3938
chr19	11617034	+	Exon	NM_001142464,NM_001142465,NM_001243204,NM_016581	5.95303e-09	-76.3889
chr1	27756209	+	Intron	NM_001201404,NM_006990	4.36282e-06	-76.3889
chr16	2983783	-	Exon	NM_020912,NM_032296	0.00092113	-76.3889
chr10	134893653	+	-	-	1.6389e-06	-76.3636
chr3	33023729	+	-	-	0.000122588	-76.3636
chr2	124310910	-	-	-	2.71882e-07	-76.3571
chr7	93204176	-	Promoter	NM_001164737,NM_001742	3.31912e-11	-76.3472
chr7	93204219	-	Promoter	NM_001164737,NM_001742	3.31912e-11	-76.3472
chr7	93204234	-	Promoter	NM_001164737,NM_001742	3.31912e-11	-76.3472
chr7	93204238	-	Promoter	NM_001164737,NM_001742	3.31912e-11	-76.3472
chr7	93204243	-	Promoter	NM_001164737,NM_001742	3.31912e-11	-76.3472
chr7	93204258	-	Promoter	NM_001164737,NM_001742	3.31912e-11	-76.3472
chr19	424424	-	Intron	NM_012435	2.58325e-13	-76.3333
chr19	2508536	-	-	-	9.32975e-10	-76.3276
chr5	140564007	+	Exon	NM_020957	3.20816e-10	-76.3242
chr7	140226410	+	Intron	NM_015689	1.59058e-16	-76.3192
chr17	72428817	-	Intron	NM_022036	1.60247e-37	-76.3187
chr9	138679056	-	Intron	NM_020822	1.09582e-05	-76.3158
chr9	135679264	+	Intron	NM_152572	0.000162181	-76.3158
chr4	155411061	+	Exon	NM_001142552	1.17375e-16	-76.3145
chr16	30968953	-	Exon	NM_014712	3.37604e-10	-76.313
chr1	46025753	-	Intron	NM_001202414,NM_006066	9.26501e-07	-76.3063
chr19	11617102	+	Exon	NM_001142464,NM_001142465,NM_001243204,NM_016581	6.88415e-09	-76.2991
chr7	16793768	+	Promoter	NM_014399	9.23345e-23	-76.2933
chr3	62860110	-	Promoter	NM_003716,NM_183393,NM_183394	1.10479e-21	-76.2888
chr19	4773488	-	-	-	2.71287e-07	-76.2712
chr2	121153771	-	-	-	3.5273e-15	-76.2688
chr5	179223165	+	Intron	NM_145867	0.00215213	-76.2656
chr11	115581830	+	-	-	9.20908e-20	-76.2504
chr17	79382042	-	Intron	NM_001080519	4.36914e-06	-76.2295
chr13	28302133	-	-	-	5.35103e-06	-76.2263
chr10	88728376	-	Promoter	NM_006829	1.71409e-06	-76.2117
chr1	111582991	+	-	-	0.000168594	-76.2112
chr10	30957251	-	-	-	1.75696e-17	-76.2089
chr17	35716556	-	Promoter	NM_198836	2.77546e-05	-76.2036
chr9	139258902	+	Promoter	NM_001080849	3.52457e-09	-76.2003
chr1	19194803	+	-	-	2.61905e-23	-76.1905
chr17	81009565	-	Promoter	NM_001009905	3.90122e-05	-76.1554
chr17	7760006	-	Exon	NM_032356	2.04367e-37	-76.1418
chr2	88302899	-	-	-	1.01554e-06	-76.1364
chr11	118971981	-	Promoter	NM_001382	6.87403e-13	-76.1265
chr9	95570662	+	-	-	4.25621e-15	-76.1254
chr16	89758884	+	-	-	1.68769e-17	-76.1199
chr1	9670791	-	Exon	NM_001130924	2.19064e-12	-76.1099
chr9	140008302	-	Promoter	NM_013379	4.87749e-10	-76.0949
chr15	40763503	+	Exon	NM_130468	1.78485e-09	-76.0895
chr4	1492372	-	-	-	2.6165e-06	-76.087
chr2	174574409	-	-	-	0.000552871	-76.087
chr19	33926163	-	Intron	NM_001166056	9.60725e-26	-76.0809
chr15	100272196	-	Exon	NM_152449	6.53537e-19	-76.0603
chr7	158749800	-	-	-	5.68429e-05	-76.0369
chr6	11417390	+	-	-	1.08731e-14	-76.0334
chr17	6296942	+	-	-	1.50155e-09	-76.0323
chr10	35225565	-	-	-	0.000875744	-76.0286
chr5	179223301	+	Exon	NM_145867	0.00215213	-76.0113
chr5	179223310	+	Exon	NM_145867	0.00215213	-76.0113
chr5	179223323	+	Exon	NM_145867	0.00215213	-76.0113
chr5	179223145	+	Intron	NM_145867	0.00215213	-76.0113
chr11	118939453	-	Promoter	NM_021729	1.05389e-21	-75.9996
chr19	18555424	-	Exon	NM_006532	1.877e-13	-75.9943
chr13	37342363	-	-	-	9.70637e-08	-75.9804
chr19	11848357	-	Intron	NM_001080493	5.54269e-05	-75.954
chr6	111196466	+	Promoter	NM_001033059	1.27451e-14	-75.9459
chr11	64335502	+	Intron	NM_018484	7.82263e-06	-75.9416
chr7	2662917	-	-	-	1.46213e-18	-75.9318
chr9	140008337	-	Exon	NM_013379	1.67275e-10	-75.9318
chr22	20114991	+	-	-	1.56403e-12	-75.9259
chr21	43735492	-	Exon	NM_003226	1.1392e-32	-75.9208
chr10	70339981	-	Intron	NM_030625	1.23348e-05	-75.9104
chr10	30957206	-	-	-	9.25764e-18	-75.9064
chr9	99637502	-	-	-	6.45048e-11	-75.9014
chr7	16793601	+	Exon	NM_014399	4.53566e-23	-75.8973
chr5	179223162	+	Intron	NM_145867	0.00215213	-75.8925
chr2	121153750	-	-	-	3.91714e-15	-75.8919
chr2	242811631	-	Promoter	NM_173821	6.61275e-10	-75.8794
chr6	88118034	+	Promoter	NM_001031743	1.04928e-13	-75.8673
chr6	88118036	+	Promoter	NM_001031743	1.04928e-13	-75.8673
chr11	55640330	-	-	-	1.04417e-13	-75.8545
chr8	144360778	-	-	-	6.87714e-12	-75.8488
chr2	171785823	-	Exon	NM_015530	2.32248e-26	-75.8224
chr7	1409096	+	-	-	5.70036e-12	-75.8074
chr6	88876729	+	Promoter	NM_001160226,NM_001160258,NM_001160259,NM_016083	2.40925e-11	-75.8021
chr3	17187177	+	-	-	1.99058e-14	-75.7727
chr17	72741254	-	Intron	NM_001006638,NM_001163989,NM_001163990,NM_175738	4.67501e-11	-75.7654
chr1	156627831	-	Intron	NM_021948	7.15032e-21	-75.7651
chr19	49492414	-	Intron	NR_027763	1.16985e-07	-75.7546
chr22	18267275	-	-	-	0.00157485	-75.7333
chr7	45157942	+	-	-	1.49438e-27	-75.7261
chr19	955415	-	Intron	NM_005224	2.0814e-10	-75.708
chr2	127899175	+	-	-	5.36764e-38	-75.6998
chr12	53720208	-	-	-	1.10643e-17	-75.6957
chr6	88876654	+	Promoter	NM_001160226,NM_001160258,NM_001160259,NM_016083	2.90283e-11	-75.6825
chr6	88876661	+	Promoter	NM_001160226,NM_001160258,NM_001160259,NM_016083	2.90283e-11	-75.6825
chr6	88876764	+	Promoter	NM_001160226,NM_001160258,NM_001160259,NM_016083	2.90283e-11	-75.6825
chr20	62121973	-	Exon	NM_001958	8.47924e-18	-75.6757
chr18	14999652	-	-	-	2.16809e-17	-75.6518
chr17	36827233	-	-	-	9.80201e-13	-75.6488
chr6	167821764	+	-	-	1.12835e-09	-75.6473
chr17	20800026	-	Promoter	NM_001004306	2.81614e-20	-75.6276
chr9	116450259	+	-	-	1.88345e-05	-75.6107
chr7	101943466	+	Intron	NM_020979	8.68582e-18	-75.6094
chr4	6947711	-	Intron	NM_001113361,NM_020773	1.14072e-15	-75.6078
chr6	88876679	+	Promoter	NM_001160226,NM_001160258,NM_001160259,NM_016083	3.17373e-11	-75.6075
chr3	62860151	-	Promoter	NM_003716,NM_183393,NM_183394	1.36701e-12	-75.6057
chr2	242811663	-	Promoter	NM_173821	6.61481e-10	-75.6031
chr19	1333856	-	-	-	8.8789e-08	-75.6026
chr6	88876748	+	Promoter	NM_001160226,NM_001160258,NM_001160259,NM_016083	2.90283e-11	-75.5974
chr8	1922749	+	Promoter	NM_014867	1.91726e-06	-75.5797
chr19	1614416	+	Intron	NM_003200	7.70255e-09	-75.5789
chr19	55607673	-	-	-	9.15021e-09	-75.5717
chr17	74820442	+	-	-	3.85676e-06	-75.5621
chr6	40567318	-	-	-	1.03486e-42	-75.5561
chr8	72460319	-	-	-	0.000971058	-75.5556
chr8	72460340	-	-	-	0.000971058	-75.5556
chr4	3627843	-	-	-	7.98755e-11	-75.5541
chr17	7330257	-	Exon	NM_175734	1.19988e-10	-75.5539
chr6	88876777	+	-	-	1.65763e-11	-75.5434
chr6	88118054	+	Promoter	NM_001031743	1.62294e-13	-75.5385
chr4	3288905	+	-	-	4.68024e-11	-75.5222
chr7	47420135	+	Intron	NM_022748	4.57129e-08	-75.5039
chr22	18593208	+	Promoter	NM_001193414,NM_018943	1.23799e-20	-75.4944
chr1	2144416	-	Promoter	NR_046424	4.66504e-09	-75.487
chr10	110573470	-	-	-	0.0022427	-75.4808
chr6	88876675	+	Promoter	NM_001160226,NM_001160258,NM_001160259,NM_016083	2.90283e-11	-75.4706
chr6	88876741	+	Promoter	NM_001160226,NM_001160258,NM_001160259,NM_016083	2.90283e-11	-75.4706
chr6	88876760	+	Promoter	NM_001160226,NM_001160258,NM_001160259,NM_016083	2.90283e-11	-75.4706
chr19	59032344	-	-	-	7.68516e-05	-75.4658
chr16	30381533	-	Promoter	NM_015527	9.23552e-06	-75.4464
chr8	143336052	+	Intron	NM_145003	0.00142993	-75.4386
chr17	3868214	-	Promoter	NM_005173,NM_174953,NM_174954,NM_174955,NM_174956,NM_174957,NM_174958	7.87407e-12	-75.415
chr8	61592410	+	Intron	NM_017780	7.72113e-08	-75.3961
chr6	88876767	+	Promoter	NM_001160226,NM_001160258,NM_001160259,NM_016083	4.15383e-11	-75.3932
chr12	53720212	-	-	-	3.13394e-22	-75.3885
chr2	191553658	-	Intron	NM_005966	1.82375e-10	-75.3846
chr19	15833929	+	-	-	0.000592544	-75.3749
chr16	27230315	-	-	-	8.66452e-06	-75.3623
chr16	27230333	-	-	-	2.94879e-05	-75.3623
chr19	33556010	+	Promoter	NM_033103	3.33691e-44	-75.3492
chr15	81294997	-	Exon	NM_022566	0.000323908	-75.3264
chr17	78995279	+	-	-	6.88226e-08	-75.3247
chr14	102051022	-	-	-	0.00370813	-75.3131
chr19	17438315	+	Exon	NM_020959	6.16061e-07	-75.3086
chr13	41346189	-	Promoter	NM_005830	6.99325e-08	-75.3039
chr19	33555996	+	Promoter	NM_033103	3.33691e-44	-75.2883
chr19	33556015	+	Promoter	NM_033103	3.33691e-44	-75.2883
chr17	37774297	-	-	-	2.53825e-08	-75.2871
chr6	88118065	+	Promoter	NM_001031743	2.33084e-13	-75.2834
chr10	132099575	-	-	-	2.24153e-11	-75.2747
chr6	88876656	+	Promoter	NM_001160226,NM_001160258,NM_001160259,NM_016083	2.90283e-11	-75.2587
chr12	79955418	+	-	-	6.53772e-06	-75.2294
chr5	179223152	+	Intron	NM_145867	0.00215213	-75.2177
chr6	88876739	+	Promoter	NM_001160226,NM_001160258,NM_001160259,NM_016083	3.17373e-11	-75.2004
chr19	53598742	-	Intron	NM_001102603,NM_033288,NM_198893	5.25061e-08	-75.1816
chr3	62860149	-	Promoter	NM_003716,NM_183393,NM_183394	2.41003e-12	-75.1777
chr3	62860225	-	Promoter	NM_003716,NM_183393,NM_183394	2.41003e-12	-75.1777
chr19	33555986	+	Promoter	NM_033103	1.03382e-43	-75.1748
chr17	884146	+	-	-	1.18973e-08	-75.1614
chr9	68304432	+	-	-	0.00180998	-75.1613
chr20	30084892	+	-	-	1.0834e-15	-75.1548
chrX	122319012	-	Promoter	NM_000828,NM_001256743,NM_007325	1.07778e-06	-75.1401
chr8	49089042	-	-	-	6.70114e-11	-75.1229
chr15	70924174	-	-	-	6.21162e-11	-75.1155
chr9	140330699	+	Exon	NM_001033113,NM_198585	5.21311e-09	-75.1111
chr2	211114063	-	-	-	4.61085e-05	-75.1024
chr16	917687	+	Intron	NM_022773,NR_033645,NR_033646	2.15479e-05	-75.1011
chr10	105794566	+	Intron	NM_000494	4.36434e-17	-75.0869
chr1	94147024	-	Promoter	NM_001261409	9.57985e-22	-75.0673
chr17	66131734	-	Exon	NR_027418	5.24464e-16	-75.0416
chr9	139500670	+	-	-	1.37404e-20	-75.0295
chr5	179223337	+	Exon	NM_145867	0.00215213	-75.0142
chr19	7873189	-	-	-	1.86536e-19	-75
chr7	156814371	+	-	-	2.47046e-13	-75
chr7	2054087	-	Intron	NM_001013836,NM_001013837,NM_003550	2.8949e-11	-75
chr4	26492313	-	Promoter	NM_000730	4.47708e-10	-75
chr17	41402164	-	-	-	2.78111e-07	-75
chr20	61305044	-	-	-	3.72041e-06	-75
chr3	80100105	+	-	-	3.81698e-09	-74.9795
chr7	4230488	-	Intron	NM_001079653,NM_152744	3.35954e-13	-74.9795
chr22	26160701	+	Intron	NM_032608	1.50894e-08	-74.9792
chr14	102829806	-	Promoter	NM_001172631,NM_014844	2.18059e-14	-74.9762
chr5	134369833	-	Exon	NM_002653	4.73635e-27	-74.9653
chr15	76640054	-	-	-	5.2017e-10	-74.9641
chr19	59032312	-	-	-	7.68534e-05	-74.9616
chr3	56500235	+	Intron	NM_015576	0.000932445	-74.9603
chr18	55096019	+	-	-	8.18767e-18	-74.9492
chr5	55704880	-	-	-	0.00152057	-74.9427
chr16	1101073	-	-	-	6.74341e-08	-74.9376
chr19	33556005	+	Promoter	NM_033103	3.33691e-44	-74.9312
chr5	76069277	+	-	-	1.57028e-05	-74.9226
chr1	4588035	+	-	-	0.000137737	-74.9003
chr5	179223131	+	Intron	NM_145867	0.00215213	-74.9002
chr3	124785421	+	-	-	4.27938e-09	-74.9001
chr19	33556007	+	Promoter	NM_033103	3.33691e-44	-74.8953
chr6	26230057	+	-	-	0.0026804	-74.8918
chr7	31408957	-	-	-	2.43168e-14	-74.8904
chr19	33556034	+	Promoter	NM_033103	7.64787e-44	-74.885
chr9	137174153	-	-	-	6.37048e-09	-74.876
chr17	79934455	+	Promoter	NM_001251888,NM_024083,NR_045351	3.88415e-19	-74.8671
chr4	3252371	+	Intron	NM_001042690	1.77533e-09	-74.8645
chr9	130616293	+	Promoter	NM_000118,NM_001114753	1.6048e-16	-74.8501
chr11	122505996	+	-	-	7.97745e-07	-74.8422
chr19	56988737	-	Exon	NM_022103,NR_030740	4.4002e-23	-74.8397
chr14	100632865	-	-	-	4.57812e-11	-74.8168
chrY	5076255	+	Intron	NM_032973	1.71439e-13	-74.8092
chr12	124844861	-	Intron	NM_006312	6.69549e-18	-74.7909
chr4	812478	-	Intron	NM_006651	1.96498e-05	-74.7907
chr16	3230757	-	-	-	4.05948e-06	-74.7863
chr8	144884410	+	Intron	NM_015356,NM_182706	5.42862e-09	-74.7826
chr1	186344998	+	Exon	NM_001164245,NM_001164246,NM_017847	5.92521e-14	-74.7653
chr16	793663	-	-	-	3.88251e-08	-74.7615
chr17	47953317	-	-	-	2.52378e-31	-74.7222
chr19	56207676	+	-	-	1.04889e-19	-74.7218
chr11	2043493	+	-	-	2.69752e-05	-74.7126
chr14	68086654	-	Exon	NM_001172	4.93149e-16	-74.6956
chr15	65685959	-	-	-	9.96499e-11	-74.6914
chr16	89258005	-	Intron	NM_004933	4.73779e-09	-74.6835
chr17	72428709	-	Intron	NM_022036	6.75498e-37	-74.6802
chr17	72428740	-	Intron	NM_022036	6.75498e-37	-74.6802
chr17	72428793	-	Intron	NM_022036	6.75498e-37	-74.6802
chr5	134369760	-	Exon	NM_002653	1.30451e-26	-74.678
chr17	78995281	+	-	-	6.88226e-08	-74.6753
chr8	97005356	+	-	-	2.37624e-18	-74.658
chr20	34351327	-	-	-	2.64894e-15	-74.6574
chr17	72428776	-	Intron	NM_022036	6.75498e-37	-74.6503
chrX	47513857	-	Intron	NR_045560	0.000207078	-74.6395
chr17	5001706	+	-	-	0.00297627	-74.6331
chr5	60235292	-	Intron	NM_000082	5.48927e-06	-74.6219
chr17	72428774	-	Intron	NM_022036	6.75498e-37	-74.6202
chr1	1562060	+	Exon	NM_001170686,NM_001170687,NM_001170688,NM_001170689,NM_080875,NR_033183	7.40993e-05	-74.6154
chr18	75735	-	-	-	6.172e-07	-74.6
chrX	153038857	+	Exon	NM_001163257,NM_005393	1.09468e-11	-74.5902
chr11	1008342	+	Intron	NM_001242837,NM_012305	7.45988e-15	-74.5804
chr3	10546705	-	Promoter	NM_001001331,NM_001683	1.82747e-09	-74.5763
chr2	101145905	-	-	-	5.10642e-07	-74.5739
chr14	68086690	-	Exon	NM_001172	7.30864e-16	-74.5622
chr18	55095992	+	-	-	8.18767e-18	-74.5616
chr18	55096029	+	-	-	8.18767e-18	-74.5616
chr2	130475082	-	-	-	1.02055e-16	-74.5438
chr22	18271273	-	Exon	NM_015241	0.00127323	-74.5338
chr21	45629535	+	-	-	7.3145e-05	-74.5295
chr17	72428785	-	Intron	NM_022036	6.75498e-37	-74.5287
chr11	74953362	+	Exon	NM_001195528	1.12146e-14	-74.5223
chr4	90045322	-	-	-	9.59029e-08	-74.4898
chr11	74953254	+	Exon	NM_001195528	1.12146e-14	-74.4896
chr8	95200157	-	Intron	NM_001144663,NM_004063	1.40475e-14	-74.4774
chr9	100746018	+	Promoter	NM_006401	1.4123e-16	-74.4578
chr2	159817765	-	-	-	1.79014e-19	-74.4526
chr1	30888292	+	-	-	5.35542e-07	-74.4505
chr7	854972	+	Promoter	NM_001171946	6.32473e-05	-74.4444
chr10	117952483	-	Intron	NM_005264	8.71645e-16	-74.4412
chr3	122400474	+	Promoter	NM_017554	3.11891e-24	-74.4268
chr17	38191335	+	Intron	NM_001079518,NM_001267797,NM_014815,NR_052017	1.24453e-13	-74.4268
chr19	33556031	+	Promoter	NM_033103	7.64787e-44	-74.412
chr10	73419851	-	Intron	NM_001171930,NM_001171931,NM_022124	8.20947e-05	-74.4
chr19	58815773	+	-	-	4.04646e-12	-74.3889
chr10	135138617	-	-	-	3.20057e-10	-74.3699
chr20	29518593	+	-	-	2.25019e-08	-74.3687
chr7	134896218	-	Exon	NM_014149	1.08305e-18	-74.3408
chr4	25990271	+	-	-	0.000359169	-74.3401
chr16	89258086	-	Exon	NM_004933	1.23213e-11	-74.331
chr21	36364673	+	Intron	NM_001754	1.80966e-30	-74.3256
chr2	131332042	+	Intron	NR_027314	3.00776e-14	-74.3243
chr17	80288121	-	Intron	NM_003004	5.00427e-13	-74.316
chr5	134369818	-	Exon	NM_002653	1.14004e-25	-74.311
chr3	62860130	-	Promoter	NM_003716,NM_183393,NM_183394	8.68302e-12	-74.2971
chr12	126280356	-	-	-	0.00424063	-74.2958
chr10	134893658	+	-	-	2.51404e-05	-74.2803
chr19	18980111	-	Exon	NM_001492,NM_021267	9.63783e-10	-74.279
chr17	72428789	-	Intron	NM_022036	5.45021e-36	-74.2737
chr8	72460435	-	-	-	0.00140853	-74.2735
chr17	72428812	-	Intron	NM_022036	6.75498e-37	-74.2601
chr11	2308615	-	-	-	6.47508e-09	-74.2456
chr5	134369747	-	Exon	NM_002653	1.30451e-26	-74.2447
chr5	134369793	-	Exon	NM_002653	1.30451e-26	-74.2447
chr5	134369814	-	Exon	NM_002653	1.30451e-26	-74.2447
chr17	79100693	+	Promoter	NR_029897	4.7868e-05	-74.2444
chrX	118856279	-	-	-	2.29017e-08	-74.2306
chr18	55096016	+	-	-	8.18767e-18	-74.2019
chr21	47504363	-	-	-	8.68395e-10	-74.1935
chr17	48068947	+	Exon	NM_005220	3.25525e-07	-74.1935
chr2	179315942	+	Promoter	NM_001042702	2.42427e-17	-74.1929
chr17	3868095	-	Promoter	NM_005173,NM_174953,NM_174954,NM_174955,NM_174956,NM_174957,NM_174958	1.55232e-11	-74.1767
chr22	21021853	-	-	-	4.59173e-08	-74.1641
chr18	55095996	+	-	-	1.84752e-17	-74.1584
chr3	73440395	-	-	-	2.81973e-06	-74.1525
chr5	134369757	-	Exon	NM_002653	2.31893e-25	-74.1445
chr19	1862148	-	Intron	NM_031918	2.59016e-05	-74.1435
chr13	24932320	-	-	-	7.76226e-15	-74.1234
chr15	40763507	+	Exon	NM_130468	5.22058e-09	-74.1228
chr15	40763522	+	Exon	NM_130468	5.22058e-09	-74.1228
chr15	40763537	+	Exon	NM_130468	5.22058e-09	-74.1228
chr15	40763610	+	Exon	NM_130468	5.22058e-09	-74.1228
chr15	40763636	+	Exon	NM_130468	5.22058e-09	-74.1228
chr17	30244487	+	-	-	2.32822e-17	-74.1184
chr15	27137012	+	Intron	NM_000810,NM_001165037	4.06135e-06	-74.1033
chr2	917919	+	-	-	5.90887e-05	-74.0948
chr19	1333951	-	-	-	2.31475e-07	-74.081
chr19	1333955	-	-	-	2.31475e-07	-74.081
chr19	1333970	-	-	-	2.31475e-07	-74.081
chr17	58228483	-	Intron	NM_000717	4.11744e-05	-74.077
chr1	24604972	+	-	-	1.36923e-15	-74.0712
chr5	140564149	+	Exon	NM_020957	3.65421e-08	-74.0668
chr3	62860114	-	Promoter	NM_003716,NM_183393,NM_183394	8.68302e-12	-74.0666
chr3	62860215	-	Promoter	NM_003716,NM_183393,NM_183394	8.68302e-12	-74.0666
chr5	56780710	+	-	-	7.34137e-05	-74.0643
chr3	62860229	-	Promoter	NM_003716,NM_183393,NM_183394	1.84329e-11	-74.0501
chr3	62860186	-	Promoter	NM_003716,NM_183393,NM_183394	8.68302e-12	-74.042
chr2	95996443	+	Intron	NM_013434	1.01709e-08	-74.0417
chr17	3868064	-	Promoter	NM_005173,NM_174953,NM_174954,NM_174955,NM_174956,NM_174957,NM_174958	1.9762e-11	-74.0381
chr11	74953260	+	Exon	NM_001195528	1.12146e-14	-74.0333
chr15	41463975	+	-	-	8.71848e-05	-74.026
chr6	88117996	+	Promoter	NM_001031743	5.76599e-12	-74.0234
chr5	134369743	-	Exon	NM_002653	1.30451e-26	-74.0205
chr5	134369773	-	Exon	NM_002653	1.30451e-26	-74.0205
chr13	24553739	+	-	-	0.00115043	-74.0176
chr15	40763592	+	Exon	NM_130468	6.0808e-09	-74.0161
chr15	40763596	+	Exon	NM_130468	8.06491e-09	-74.0161
chr15	76640019	-	-	-	5.2017e-10	-74.008
chr4	7072990	+	-	-	1.02395e-36	-73.9938
chr17	72428714	-	Intron	NM_022036	5.99646e-36	-73.9879
chr7	853203	-	-	-	2.91884e-18	-73.986
chr12	117536260	-	Promoter	NM_001168325,NM_017899,NR_031766	3.26194e-08	-73.9827
chr5	134369800	-	Exon	NM_002653	1.30451e-26	-73.9811
chr5	3188067	-	-	-	2.97845e-07	-73.9723
chr10	35896625	-	Exon	NM_153368	0.000804567	-73.9655
chr17	3868086	-	Promoter	NM_005173,NM_174953,NM_174954,NM_174955,NM_174956,NM_174957,NM_174958	1.55232e-11	-73.963
chr22	50944575	+	Exon	NM_033200	6.15851e-07	-73.9583
chr21	40317004	-	-	-	5.65887e-19	-73.9496
chr12	129716266	-	Intron	NM_133448	1.04304e-26	-73.939
chr11	280589	-	Exon	NM_138329	5.00337e-08	-73.9309
chr2	54856401	+	Exon	NM_003128,NM_178313	3.51207e-26	-73.9295
chr1	62665227	-	Intron	NM_019079	0.000548287	-73.913
chr11	74953374	+	Exon	NM_001195528	1.12146e-14	-73.8785
chr11	74953387	+	Exon	NM_001195528	1.12146e-14	-73.8785
chr9	95570634	+	-	-	3.02847e-15	-73.8736
chr5	571252	-	-	-	0.000918028	-73.8705
chr9	138135096	-	-	-	1.56606e-18	-73.8491
chr9	132256140	+	Intron	NR_038955	4.313e-07	-73.837
chr2	130895161	-	-	-	3.20368e-09	-73.8342
chr17	30244394	+	-	-	2.32822e-17	-73.8304
chr9	29826605	-	-	-	5.46649e-12	-73.8096
chr5	134369781	-	Exon	NM_002653	2.69804e-26	-73.8063
chr22	27520713	-	-	-	6.56162e-23	-73.7952
chr22	27520731	-	-	-	6.56162e-23	-73.7952
chr19	11653307	+	Intron	NM_001299	7.65412e-20	-73.7911
chr3	49622988	-	Intron	NM_003458	2.7071e-05	-73.7892
chr9	95570659	+	-	-	3.78992e-15	-73.7842
chr4	155702761	-	Promoter	NM_144979	1.12362e-39	-73.7742
chr16	88628675	-	-	-	8.81476e-08	-73.772
chr16	6869436	-	Intron	NM_001142334	9.39783e-12	-73.7709
chr18	55096027	+	-	-	1.84752e-17	-73.7708
chr7	156814294	+	-	-	2.75451e-13	-73.7692
chr7	1893485	+	Intron	NM_001013836,NM_001013837,NM_003550	7.95289e-14	-73.7636
chr9	95570707	+	-	-	3.02847e-15	-73.751
chr12	52408644	+	Exon	NM_181711	0.000209791	-73.7334
chr17	1092368	+	-	-	1.31611e-07	-73.7269
chr11	65381164	+	Exon	NM_002419	2.49788e-13	-73.7179
chr19	1482544	-	Intron	NM_017573	8.98e-06	-73.7069
chr7	813490	-	Intron	NM_017802	8.32668e-08	-73.7055
chr8	41753453	+	Promoter	NM_001142446	2.00059e-17	-73.6938
chr11	119368895	+	Intron	NR_034160	2.22333e-12	-73.6867
chr16	81041800	+	Intron	NM_001100624,NM_001100625,NM_001270473,NM_001270474,NM_018455	1.00524e-17	-73.6843
chr6	36973750	+	Intron	NM_173558	2.70987e-05	-73.6842
chr19	49569279	-	-	-	2.37545e-05	-73.6652
chr15	76498005	+	-	-	0.000348611	-73.6597
chr1	1625366	+	Intron	NM_033487	7.44296e-07	-73.6538
chr18	28991112	-	Exon	NM_001134453	1.58473e-29	-73.6534
chr18	42836051	+	Intron	NM_001242692	1.32842e-15	-73.65
chr14	68086658	-	Exon	NM_001172	2.83319e-15	-73.6497
chr19	6713275	+	Exon	NM_000064	2.40737e-27	-73.644
chr8	29630975	+	-	-	6.47535e-06	-73.6423
chr11	65313988	+	Exon	NM_001130144,NM_001164266,NM_021070	3.54346e-20	-73.6337
chr5	134369798	-	Exon	NM_002653	8.18872e-25	-73.6249
chr8	144673025	+	Intron	NM_032378	2.25346e-08	-73.6111
chr9	95570657	+	-	-	1.00129e-14	-73.6102
chr13	45955089	-	Intron	NR_024458	3.04549e-11	-73.599
chr6	41968180	-	Intron	NM_001136126	2.57541e-16	-73.5985
chr15	72582198	+	Intron	NM_001172684,NM_001172685,NM_052840	5.79376e-06	-73.5929
chr8	27132039	+	-	-	3.24374e-15	-73.5922
chr22	37738558	+	-	-	4.44455e-07	-73.5871
chr22	37669511	+	-	-	3.51163e-11	-73.5816
chr12	862433	+	Exon	NM_001184985,NM_014823,NM_018979,NM_213655	6.51606e-15	-73.5515
chr22	37855873	+	-	-	1.75747e-05	-73.5364
chr1	226037813	+	Intron	NM_014698	2.57138e-11	-73.5332
chr7	152591489	+	-	-	3.02915e-09	-73.5294
chr11	74953368	+	Exon	NM_001195528	1.12146e-14	-73.5206
chr15	65094455	+	-	-	1.37531e-10	-73.5123
chr4	5815431	+	Exon	NM_153717	2.32093e-09	-73.5101
chr7	1140381	-	Intron	NM_001134395,NM_001134396,NM_032350	9.62695e-17	-73.5074
chr7	2707270	+	-	-	2.60106e-10	-73.5023
chr9	116450268	+	-	-	4.30631e-05	-73.4931
chr16	1199837	-	-	-	1.32854e-11	-73.4848
chr10	101492144	-	Exon	NM_004376,NM_078470	9.10114e-14	-73.4816
chr10	101492153	-	Exon	NM_004376,NM_078470	9.10114e-14	-73.4816
chr5	134369805	-	Exon	NM_002653	2.31893e-25	-73.4719
chr5	140573971	-	Exon	NM_018930	2.75916e-12	-73.4707
chr17	29839280	+	Intron	NM_032932	1.70538e-07	-73.4685
chr9	95570676	+	-	-	5.95601e-15	-73.4637
chrX	30663784	+	-	-	1.31238e-16	-73.4577
chr9	131155793	+	Promoter	NR_029837	5.77942e-10	-73.4566
chr19	33688685	-	Intron	NM_002333	4.68855e-13	-73.4501
chr1	7606108	+	Intron	NM_015215	2.84567e-06	-73.4448
chr16	1096624	+	-	-	1.60021e-06	-73.4343
chr19	45874313	-	Promoter	NM_000400,NM_001130867	0.000960949	-73.4274
chr2	180694535	+	Intron	NM_152520	9.28813e-05	-73.414
chrX	153580239	-	Intron	NM_001110556,NM_001456	7.17576e-10	-73.3873
chr17	72741177	-	-	-	1.34266e-10	-73.3871
chr14	68086656	-	Exon	NM_001172	2.83319e-15	-73.364
chr19	33556097	+	Promoter	NM_033103	6.5771e-39	-73.3439
chr17	3868069	-	Promoter	NM_005173,NM_174953,NM_174954,NM_174955,NM_174956,NM_174957,NM_174958	1.55232e-11	-73.3434
chr1	227014107	-	-	-	2.33857e-07	-73.3412
chr22	51042173	+	Promoter	NM_016431	8.46029e-05	-73.3333
chr10	27609419	-	-	-	2.06677e-19	-73.3277
chr12	57081551	+	Intron	NM_006601	9.40889e-09	-73.3264
chr7	2621135	+	Intron	NM_001100390,NM_152558	1.14377e-05	-73.3247
chr1	11561462	-	Exon	NM_020780	1.43977e-07	-73.3135
chr16	88628492	-	-	-	1.18326e-07	-73.3059
chr16	88628652	-	-	-	1.18326e-07	-73.3059
chr9	131155831	+	Promoter	NR_029837	3.51553e-10	-73.3029
chr15	66291531	-	Intron	NM_032445	7.32471e-06	-73.2928
chr3	26403406	-	-	-	2.65694e-15	-73.2778
chr19	12273956	-	Exon	NM_003437	2.45607e-06	-73.2639
chr19	12273958	-	Exon	NM_003437	2.45607e-06	-73.2639
chr19	12273984	-	Exon	NM_003437	2.45607e-06	-73.2639
chr19	12273815	-	Promoter	NM_003437	2.45607e-06	-73.2639
chr19	12273828	-	Promoter	NM_003437	2.45607e-06	-73.2639
chr19	12273830	-	Promoter	NM_003437	2.45607e-06	-73.2639
chr19	12273833	-	Promoter	NM_003437	2.45607e-06	-73.2639
chr19	12273836	-	Promoter	NM_003437	2.45607e-06	-73.2639
chr19	12273842	-	Promoter	NM_003437	2.45607e-06	-73.2639
chr17	73501068	+	Exon	NM_001142643,NM_020753	1.08917e-14	-73.2637
chr10	119296670	+	Intron	NR_002791	8.86187e-07	-73.2534
chr10	101089970	+	Exon	NM_020348	5.53456e-21	-73.2522
chr11	99022591	+	Intron	NM_001243271,NM_014361	3.80746e-22	-73.2389
chr8	27131884	+	-	-	9.66628e-15	-73.2304
chr8	27132030	+	-	-	9.66628e-15	-73.2304
chr8	27132014	+	-	-	9.66628e-15	-73.2269
chr8	27132012	+	-	-	9.66628e-15	-73.2233
chr19	1333989	-	-	-	5.61969e-07	-73.2189
chr11	420759	-	Exon	NM_001012302	0.00194022	-73.2152
chr19	55874228	-	Promoter	NM_001145402	0.00142039	-73.2143
chr1	231520602	-	Intron	NM_022051	2.78358e-15	-73.2127
chr16	22311312	+	Intron	NM_001258035	7.42995e-19	-73.2076
chr17	72428695	-	Intron	NM_022036	2.82276e-34	-73.2025
chr1	6507453	+	Intron	NM_031475	7.10178e-06	-73.1871
chr13	50070703	+	Promoter	NM_001040443	2.91227e-07	-73.1867
chrX	24043641	+	Intron	NM_030624	0.00134951	-73.1746
chr7	64030740	-	-	-	4.72133e-10	-73.1693
chr22	51169278	-	Exon	NM_033517	7.15571e-11	-73.1685
chr3	62860222	-	Promoter	NM_003716,NM_183393,NM_183394	1.48333e-10	-73.1575
chr6	170338768	+	-	-	3.69587e-10	-73.1491
chr14	93385934	+	-	-	4.94233e-09	-73.1399
chr9	126133149	-	Exon	NM_173689	6.07798e-13	-73.1351
chr12	120569046	-	Exon	NM_006836	1.74402e-12	-73.1119
chr19	12273811	-	Promoter	NM_003437	2.80298e-06	-73.1087
chr4	74139573	+	-	-	3.63715e-09	-73.0952
chr19	55855126	+	-	-	4.29415e-13	-73.093
chr17	1957237	-	-	-	3.48389e-05	-73.0882
chr17	1957252	-	-	-	3.48389e-05	-73.0882
chr17	1957259	-	-	-	3.48389e-05	-73.0882
chr17	1957360	-	-	-	3.48389e-05	-73.0882
chr17	1957366	-	-	-	3.48389e-05	-73.0882
chr17	1957371	-	-	-	3.48389e-05	-73.0882
chr15	27772971	+	Intron	NM_033223	1.67809e-09	-73.0769
chr17	45791801	-	-	-	5.07864e-12	-73.0661
chr3	62860189	-	Promoter	NM_003716,NM_183393,NM_183394	1.48333e-10	-73.0575
chr17	78405074	+	Intron	NM_001164637,NM_173627	3.69932e-18	-73.0543
chr17	48983684	-	-	-	6.26867e-20	-73.052
chr17	6925474	+	Promoter	NM_181844	4.82692e-17	-73.0519
chr3	62860211	-	Promoter	NM_003716,NM_183393,NM_183394	2.41003e-12	-73.05
chr10	101089972	+	Exon	NM_020348	4.00675e-21	-73.0449
chr7	1330442	+	-	-	0.000200569	-73.0382
chrX	132091211	-	Exon	NM_001077188,NM_147175	2.94412e-16	-73.0351
chr10	101492134	-	Exon	NM_004376,NM_078470	2.14765e-13	-73.0271
chr9	131155819	+	Promoter	NR_029837	4.23768e-10	-73.0256
chr19	30017145	-	Promoter	NM_001146339	4.61137e-21	-73.017
chr3	73433106	+	Exon	NM_015009	1.81769e-11	-73.0159
chr14	95087461	+	Intron	NM_001085	6.93964e-20	-73.014
chr12	52408679	+	Exon	NM_181711	0.000280884	-73.01
chrX	132091120	-	Exon	NM_001077188,NM_147175	1.77322e-16	-73.0056
chr13	50070718	+	Promoter	NM_001040443	2.1991e-06	-73.0014
chr17	47494453	+	-	-	4.69176e-11	-72.9942
chr19	8595681	+	Intron	NM_012335	0.00226176	-72.9812
chr3	32764808	+	Intron	NM_001256741,NM_001256742,NM_015442,NR_046352	8.13575e-06	-72.9787
chr8	1596737	+	Intron	NM_004745	7.80501e-05	-72.973
chr19	871216	+	Exon	NM_005481	1.02605e-07	-72.9657
chr17	38655609	-	Intron	NM_032865	3.20239e-11	-72.9655
chr2	241992541	+	Intron	NM_001080437	1.74449e-12	-72.963
chr19	4854737	-	Intron	NM_001164194	2.42298e-05	-72.9544
chr1	161586903	-	-	-	4.04047e-12	-72.9533
chr12	27997594	+	-	-	9.33039e-19	-72.9474
chr3	197466423	+	Intron	NM_001145642	5.54616e-22	-72.9341
chr16	883161	+	-	-	4.11002e-06	-72.9333
chr16	4368415	+	-	-	1.22094e-11	-72.9198
chr2	43913429	-	Intron	NM_172069	0.000323205	-72.9167
chrX	130037079	+	Exon	NM_006375,NM_182314	3.32199e-09	-72.9085
chr18	55096009	+	-	-	4.05202e-16	-72.895
chr2	26249438	-	-	-	1.43417e-11	-72.8947
chrX	132091108	-	Exon	NM_001077188,NM_147175	2.94412e-16	-72.8623
chr3	183872642	-	Promoter	NM_004423	1.48943e-09	-72.8613
chr17	47953280	-	-	-	1.96951e-21	-72.8612
chr18	77280054	+	Intron	NM_172387	2.41296e-07	-72.8571
chr12	79499382	+	Intron	NM_001135805,NM_001135806,NM_005639	0.00396778	-72.8571
chr15	76640011	-	-	-	1.16768e-09	-72.856
chr13	40714552	+	-	-	2.79887e-14	-72.8555
chr22	48998844	-	Intron	NM_015381	3.83171e-05	-72.8548
chr1	227760669	+	Intron	NR_033184	1.14014e-10	-72.8378
chr17	47953373	-	-	-	3.95858e-23	-72.8344
chr13	25115567	-	-	-	2.80901e-12	-72.8341
chr19	30017111	-	Promoter	NM_001146339	7.06123e-22	-72.8104
chr20	61150626	+	Promoter	NR_029780	8.064e-17	-72.8016
chr1	63789910	+	Exon	NM_012183	1.09826e-12	-72.8006
chr10	27609407	-	-	-	2.06738e-19	-72.7763
chr20	48825153	-	-	-	1.82672e-08	-72.7737
chr11	119543208	-	Intron	NM_203285	2.12452e-18	-72.7689
chr1	55069443	-	-	-	3.94885e-05	-72.7658
chr6	132719907	-	Intron	NM_015529	3.6053e-10	-72.7585
chr19	7953818	-	Promoter	NM_001268284,NM_001268285,NM_025061	2.2849e-16	-72.7526
chr8	139601517	+	Exon	NM_152888	1.02803e-15	-72.7515
chr9	139156198	-	-	-	1.1833e-13	-72.7352
chr3	56767167	+	Intron	NM_001128615,NM_001128616,NM_019555	9.67916e-19	-72.731
chr3	96779624	+	Intron	NM_001080448	3.53216e-13	-72.7015
chr10	101492086	-	Exon	NM_004376,NM_078470	2.53678e-12	-72.7004
chr11	70341257	-	Intron	NM_012309,NM_133266	0.00138179	-72.6974
chr2	9894237	-	-	-	5.97413e-09	-72.6963
chr1	204048242	+	Intron	NM_005686	5.2386e-12	-72.6891
chr7	101022439	-	Intron	NM_133457	0.000346282	-72.6786
chr19	30017030	-	Promoter	NM_001146339	4.61162e-21	-72.6746
chr2	71787158	-	Intron	NM_001130455,NM_001130976,NM_001130977,NM_001130978,NM_001130979,NM_001130980,NM_001130981,NM_001130982,NM_001130983,NM_001130984,NM_001130985,NM_001130986,NM_001130987,NM_003494	1.22923e-28	-72.6744
chr4	81111598	-	Intron	NM_020226	2.68876e-05	-72.6708
chr3	128764838	-	-	-	1.51496e-05	-72.66
chr15	100655484	-	Intron	NM_139057	4.43716e-11	-72.6449
chr5	175433721	-	-	-	7.15016e-07	-72.6449
chr3	153840201	-	Exon	NM_001251962,NM_001251963,NM_015595	9.79764e-23	-72.6437
chr15	31521646	+	-	-	4.13994e-09	-72.6352
chr14	41599371	+	-	-	5.18188e-13	-72.633
chr2	220507563	+	-	-	4.48556e-24	-72.6299
chr9	139258928	+	Promoter	NM_001080849	8.10995e-09	-72.621
chr7	137453541	-	Intron	NM_004717	0.000909409	-72.6166
chr7	31091413	-	Promoter	NM_001118,NM_001199635,NM_001199636,NM_001199637	4.89966e-11	-72.6143
chr22	50343083	+	-	-	4.62462e-08	-72.6002
chr15	42745187	+	Intron	NM_022473	4.10147e-13	-72.5953
chrX	132091096	-	Exon	NM_001077188,NM_147175	2.94412e-16	-72.5921
chrX	132091164	-	Exon	NM_001077188,NM_147175	2.94412e-16	-72.5921
chrX	132091180	-	Exon	NM_001077188,NM_147175	2.94412e-16	-72.5921
chrX	132091196	-	Exon	NM_001077188,NM_147175	2.94412e-16	-72.5921
chr9	116450226	+	-	-	0.000160165	-72.5896
chr17	49250454	+	-	-	0.00436511	-72.5806
chr1	155247289	-	Exon	NM_020897,NR_073074	1.97903e-27	-72.5783
chr16	84219888	-	Promoter	NM_001243156,NM_001243157,NM_001243158,NM_001243159,NM_001243160,NM_005679,NM_139353	5.60346e-15	-72.5673
chr18	46387224	+	Exon	NM_001142397,NM_014772	3.21409e-07	-72.5664
chr9	89192467	-	-	-	8.11983e-11	-72.5642
chr8	141360875	-	Intron	NM_001160372,NM_031466	0.000606062	-72.5595
chr19	41036826	-	Promoter	NM_025213	1.01028e-16	-72.5581
chr1	155247300	-	Exon	NM_020897,NR_073074	5.77451e-27	-72.5556
chr9	134591176	+	Intron	NM_005312	2.50041e-05	-72.549
chr17	45773324	-	Exon	NM_014726	1.65463e-08	-72.5427
chr17	6925427	+	Promoter	NM_181844	4.82692e-17	-72.5417
chr17	6925437	+	Promoter	NM_181844	4.82692e-17	-72.5417
chr17	6925444	+	Promoter	NM_181844	4.82692e-17	-72.5417
chr17	6925462	+	Promoter	NM_181844	4.82692e-17	-72.5417
chr17	6925496	+	Promoter	NM_181844	4.82692e-17	-72.5417
chr17	6925514	+	Promoter	NM_181844	4.82692e-17	-72.5417
chr3	32501677	-	-	-	8.75649e-07	-72.5348
chr17	55924380	+	Intron	NM_016070	0.000315382	-72.5316
chr19	871106	+	Exon	NM_005481	2.36746e-07	-72.5137
chr1	1120733	-	Exon	NM_153254	0.000784819	-72.5116
chr16	75240374	+	Promoter	NM_001025200	1.29433e-11	-72.5
chr12	130009564	-	Intron	NM_133448	0.000905909	-72.4911
chr19	11616990	+	Exon	NM_001142464,NM_001142465,NM_001243204,NM_016581	4.31527e-08	-72.4853
chr1	44031124	-	Intron	NM_002840,NM_130440	5.33854e-05	-72.4786
chr6	3295694	+	Intron	NM_015482,NM_021945	3.62114e-13	-72.4698
chr2	75834033	+	-	-	5.12636e-16	-72.4662
chr1	155247297	-	Exon	NM_020897,NR_073074	2.72331e-27	-72.4556
chr10	133224103	+	-	-	1.85266e-20	-72.4453
chr4	124090931	+	Intron	NM_145207	0.00345192	-72.4425
chr14	92852025	+	Intron	NM_153646,NM_153647,NM_153648	1.08548e-18	-72.4417
chr4	111141329	+	-	-	8.23902e-07	-72.4409
chr12	66482317	-	-	-	1.26457e-17	-72.4387
chr2	96041728	-	Intron	NM_001034914,NM_013434	1.34116e-14	-72.436
chr1	116299562	+	Intron	NM_001232	2.11778e-14	-72.4359
chr4	81111601	-	Intron	NM_020226	7.24378e-05	-72.4327
chr8	145693444	+	Intron	NM_145754	9.50112e-32	-72.432
chr5	159355942	-	Intron	NM_000679	3.79839e-21	-72.4287
chr12	862461	+	Exon	NM_001184985,NM_014823,NM_018979,NM_213655	1.79524e-13	-72.4264
chr11	1356914	+	-	-	1.28451e-08	-72.4138
chr1	200915105	+	-	-	2.01102e-08	-72.4138
chr17	79934439	+	Promoter	NM_001251888,NM_024083,NR_045351	1.7068e-06	-72.4101
chrX	132091200	-	Exon	NM_001077188,NM_147175	6.19098e-16	-72.3903
chr18	55095982	+	-	-	7.9767e-25	-72.3883
chr19	19753728	-	Promoter	NM_016573	4.40624e-07	-72.3834
chr7	25898688	+	-	-	0.0005609	-72.3757
chr19	39798156	-	Exon	NM_020862	3.20682e-15	-72.3696
chr1	155247260	-	Exon	NM_020897,NR_073074	1.97903e-27	-72.3662
chr1	155247271	-	Exon	NM_020897,NR_073074	1.97903e-27	-72.3662
chr1	155247277	-	Exon	NM_020897,NR_073074	1.97903e-27	-72.3662
chr1	155247398	-	Exon	NM_020897,NR_073074	1.97903e-27	-72.3662
chr17	6925466	+	Promoter	NM_181844	4.82692e-17	-72.3644
chr17	6925516	+	Promoter	NM_181844	4.82692e-17	-72.3644
chr2	129659107	-	-	-	5.06456e-18	-72.3475
chr17	36827189	-	-	-	1.39705e-06	-72.3427
chr10	101089907	+	Exon	NM_020348	1.73985e-20	-72.3374
chr10	101089936	+	Exon	NM_020348	1.73985e-20	-72.3374
chr10	101090017	+	Exon	NM_020348	1.73985e-20	-72.3374
chr22	46328260	-	Intron	NM_058238	5.6709e-13	-72.3211
chr20	30700421	+	Intron	NM_014742	3.24758e-08	-72.3191
chr17	1957232	-	-	-	3.48389e-05	-72.319
chr17	1957250	-	-	-	3.48389e-05	-72.319
chr17	1957380	-	-	-	3.48389e-05	-72.319
chr17	1957355	-	-	-	0.000117037	-72.319
chr19	4368659	-	Intron	NM_001199943,NM_001199944,NM_003025	2.60912e-08	-72.3118
chr13	57232355	+	-	-	2.04082e-06	-72.292
chr17	30244383	+	-	-	8.09234e-16	-72.269
chr21	45923802	+	Intron	NM_144991	1.22128e-20	-72.2572
chr1	155247362	-	Exon	NM_020897,NR_073074	2.72331e-27	-72.2522
chr17	81009616	-	Exon	NM_001009905	0.000235832	-72.2504
chr17	81009652	-	Exon	NM_001009905	0.000235832	-72.2504
chr17	81009658	-	Exon	NM_001009905	0.000235832	-72.2504
chr17	81009534	-	Promoter	NM_001009905	0.000235832	-72.2504
chr17	81009567	-	Promoter	NM_001009905	0.000235832	-72.2504
chr1	30801330	+	-	-	4.28725e-29	-72.2385
chr1	155247268	-	Exon	NM_020897,NR_073074	1.97903e-27	-72.2356
chr1	155247379	-	Exon	NM_020897,NR_073074	1.97903e-27	-72.2356
chr9	136696323	+	Intron	NM_001134398,NM_003371	9.1961e-11	-72.2321
chr22	51170445	-	Exon	NM_033517	5.25229e-10	-72.2222
chr1	65614693	-	Promoter	NM_013410	9.01371e-05	-72.2222
chr2	91714575	-	-	-	0.00079481	-72.2222
chr2	32557911	-	-	-	0.00459122	-72.2222
chr2	25188217	-	Intron	NM_001198559,NM_016544	2.92983e-18	-72.2202
chr11	117856658	-	Promoter	NM_001558,NR_026691	1.99694e-28	-72.2199
chr14	104743966	-	-	-	4.6372e-11	-72.1993
chr3	51429228	+	Exon	NM_013286	9.84267e-10	-72.1897
chr3	51429234	+	Exon	NM_013286	9.84267e-10	-72.1897
chr3	51429274	+	Exon	NM_013286	9.84267e-10	-72.1897
chr3	51429295	+	Exon	NM_013286	9.84267e-10	-72.1897
chr17	10512948	-	-	-	0.003516	-72.1817
chr2	388316	+	-	-	7.86598e-05	-72.1774
chr9	138951441	+	Intron	NM_144653	1.04229e-15	-72.1767
chr19	17286735	-	Intron	NM_001130065,NM_004145	8.06344e-10	-72.1621
chr19	30017042	-	Promoter	NM_001146339	4.61318e-21	-72.1558
chr14	23291246	-	-	-	3.96376e-16	-72.1481
chr19	871130	+	Exon	NM_005481	2.46835e-07	-72.1324
chr14	68086831	-	Promoter	NM_001172	5.03225e-21	-72.1307
chr16	1149337	-	-	-	7.29617e-07	-72.1113
chr10	1405407	-	Exon	NM_018702	1.19097e-12	-72.1076
chr12	862426	+	Exon	NM_001184985,NM_014823,NM_018979,NM_213655	1.17481e-13	-72.0986
chr12	862576	+	Exon	NM_001184985,NM_014823,NM_018979,NM_213655	1.17481e-13	-72.0986
chr12	12600279	+	Intron	NM_058169	3.3332e-08	-72.0833
chrX	130037082	+	Exon	NM_006375,NM_182314	3.32258e-09	-72.0827
chrX	130037084	+	Exon	NM_006375,NM_182314	3.32258e-09	-72.0827
chrX	130037100	+	Exon	NM_006375,NM_182314	3.32258e-09	-72.0827
chrX	130037123	+	Exon	NM_006375,NM_182314	3.32258e-09	-72.0827
chrX	130037126	+	Exon	NM_006375,NM_182314	3.32258e-09	-72.0827
chrX	130037141	+	Exon	NM_006375,NM_182314	3.32258e-09	-72.0827
chrX	130037150	+	Exon	NM_006375,NM_182314	3.32258e-09	-72.0827
chrX	130037155	+	Exon	NM_006375,NM_182314	3.32258e-09	-72.0827
chrX	130037157	+	Exon	NM_006375,NM_182314	3.32258e-09	-72.0827
chrX	130037113	+	Exon	NM_006375,NM_182314	3.32262e-09	-72.0827
chrX	130037128	+	Exon	NM_006375,NM_182314	3.32262e-09	-72.0827
chr11	71948675	-	Exon	NM_001567	5.09526e-21	-72.0812
chr10	37414452	+	Promoter	NM_052997	1.23664e-14	-72.0798
chr3	153840107	-	Exon	NM_001251962,NM_001251963,NM_015595	3.47797e-22	-72.0755
chr1	32237548	-	-	-	1.13021e-08	-72.0515
chr20	55023014	+	Intron	NM_001164114,NM_001164115,NM_001164116,NM_020356	1.37573e-08	-72.0456
chr3	153840204	-	Exon	NM_001251962,NM_001251963,NM_015595	3.47797e-22	-72.0425
chr16	322850	-	Intron	NM_003834,NM_183337	1.36916e-15	-72.0238
chr3	128764878	-	-	-	1.51496e-05	-72.0189
chr19	30017049	-	Promoter	NM_001146339	4.61695e-21	-72.0167
chr19	30017065	-	Promoter	NM_001146339	4.61695e-21	-72.0167
chr19	30017105	-	Promoter	NM_001146339	4.61695e-21	-72.0167
chr19	30017128	-	Promoter	NM_001146339	4.61695e-21	-72.0167
chr7	64030630	-	-	-	3.42551e-10	-72.0128
chr10	49912481	-	Intron	NM_020945	0.00167298	-72.0081
chr1	117452436	-	Promoter	NM_020440	5.66486e-17	-72.0073
chr1	155247358	-	Exon	NM_020897,NR_073074	2.72331e-27	-71.9911
chr19	46931037	-	-	-	7.68596e-29	-71.9888
chr2	121200400	+	-	-	0.000209526	-71.9885
chr5	131992225	+	-	-	1.99995e-07	-71.9846
chr2	106016173	+	Promoter	NM_001039492	1.51926e-05	-71.9831
chr3	51429249	+	Exon	NM_013286	1.00929e-09	-71.9814
chr16	23522191	+	Promoter	NM_015044	1.05638e-18	-71.9794
chr3	153840198	-	Exon	NM_001251962,NM_001251963,NM_015595	3.47797e-22	-71.9755
chr17	80803187	-	Intron	NM_005993	5.42855e-08	-71.964
chr2	168343152	+	-	-	8.95403e-08	-71.9518
chr3	95149580	+	-	-	4.51365e-16	-71.9513
chr1	155247287	-	Exon	NM_020897,NR_073074	1.97903e-27	-71.9473
chr1	224302354	+	Promoter	NM_001136115,NM_015176,NR_049764	1.80114e-14	-71.9359
chr2	200783380	+	Intron	NM_153689	9.81764e-06	-71.9231
chr16	57496723	-	Promoter	NM_032940	0.000239885	-71.9223
chr17	30244370	+	-	-	2.32822e-17	-71.9178
chr3	51429226	+	Exon	NM_013286	9.84267e-10	-71.915
chr3	51429286	+	Exon	NM_013286	9.84267e-10	-71.915
chr19	35505161	-	Exon	NM_001136199,NM_020895	3.88409e-15	-71.9126
chr12	131607136	+	Intron	NM_198827	5.11005e-06	-71.9055
chr16	57496764	-	Promoter	NM_032940	0.000516632	-71.9043
chr1	202328691	-	Intron	NM_001167857,NM_001167858,NM_002481	4.33525e-07	-71.8999
chr10	101089916	+	Exon	NM_020348	1.73985e-20	-71.895
chr10	101089933	+	Exon	NM_020348	1.73985e-20	-71.895
chr10	101089929	+	Exon	NM_020348	1.73985e-20	-71.8871
chr17	42403727	-	-	-	1.34925e-16	-71.881
chr9	129445521	+	Intron	NM_001174146,NM_001174147,NM_002316	0.00293436	-71.8779
chr19	12273938	-	Exon	NM_003437	3.81003e-06	-71.875
chr1	25223506	-	-	-	1.24787e-06	-71.8673
chr17	77079364	-	Intron	NM_001042573	9.46432e-05	-71.8646
chr19	49901042	+	Intron	NM_144688	2.30571e-08	-71.8615
chr2	241190895	+	-	-	3.68841e-20	-71.8547
chr1	11561578	-	Exon	NM_020780	4.31621e-07	-71.8545
chrX	78864874	+	-	-	7.67742e-11	-71.8464
chr11	39369799	+	-	-	6.15659e-21	-71.8429
chr1	155247254	-	Exon	NM_020897,NR_073074	1.97903e-27	-71.832
chr6	166075193	-	Promoter	NM_001130690,NR_045597	3.52474e-09	-71.8289
chr19	10747172	+	Exon	NM_001145056,NM_020428	2.91457e-23	-71.8282
chr3	153840101	-	Exon	NM_001251962,NM_001251963,NM_015595	3.47797e-22	-71.8242
chr17	7128092	-	-	-	1.29248e-05	-71.8166
chr6	166075122	-	Promoter	NM_001130690,NR_045597	3.19212e-09	-71.8157
chrX	130037111	+	Exon	NM_006375,NM_182314	3.32262e-09	-71.805
chr16	58499221	-	Promoter	NM_022910	7.34024e-27	-71.7897
chr7	106952134	-	Intron	NM_001161520,NM_006348,NM_181733	1.14453e-06	-71.7876
chr2	74730395	+	Exon	NM_001009812	1.48915e-24	-71.7651
chr16	85371327	+	-	-	2.3767e-10	-71.7647
chrX	67802570	+	-	-	1.01064e-13	-71.7644
chr1	3688236	-	-	-	8.5678e-05	-71.7611
chr15	75917706	-	Promoter	NM_001042581,NM_005701	6.9864e-08	-71.7501
chr15	75917722	-	Promoter	NM_001042581,NM_005701	6.9864e-08	-71.7501
chr15	75917730	-	Promoter	NM_001042581,NM_005701	6.9864e-08	-71.7501
chr15	75917732	-	Promoter	NM_001042581,NM_005701	6.9864e-08	-71.7501
chr15	75917735	-	Promoter	NM_001042581,NM_005701	6.9864e-08	-71.7501
chr15	75917793	-	Promoter	NM_001042581,NM_005701	6.9864e-08	-71.7501
chr16	58499202	-	Promoter	NM_022910	5.51325e-27	-71.7368
chr12	862429	+	Exon	NM_001184985,NM_014823,NM_018979,NM_213655	1.79524e-13	-71.7222
chr12	862449	+	Exon	NM_001184985,NM_014823,NM_018979,NM_213655	1.79524e-13	-71.7222
chr12	862458	+	Exon	NM_001184985,NM_014823,NM_018979,NM_213655	1.79524e-13	-71.7222
chr12	862581	+	Exon	NM_001184985,NM_014823,NM_018979,NM_213655	1.79524e-13	-71.7222
chr12	862589	+	Exon	NM_001184985,NM_014823,NM_018979,NM_213655	1.79524e-13	-71.7222
chr12	862611	+	Exon	NM_001184985,NM_014823,NM_018979,NM_213655	1.79524e-13	-71.7222
chr3	153840195	-	Exon	NM_001251962,NM_001251963,NM_015595	3.47797e-22	-71.7162
chr12	862436	+	Exon	NM_001184985,NM_014823,NM_018979,NM_213655	1.79524e-13	-71.7041
chr12	862454	+	Exon	NM_001184985,NM_014823,NM_018979,NM_213655	1.79524e-13	-71.7041
chr16	57496715	-	Exon	NM_032940	0.000259604	-71.7015
chr22	46458027	+	-	-	2.70694e-10	-71.6916
chr2	121200533	+	-	-	0.000183363	-71.6719
chr19	1306653	+	-	-	4.06963e-06	-71.6685
chr4	169198816	+	Intron	NM_017631	3.18586e-14	-71.6646
chr1	2480020	-	-	-	0.000229775	-71.6414
chr7	603816	-	Intron	NM_001164758,NM_001164759,NM_001164760,NM_001164761,NM_001164762,NM_002735	1.12359e-07	-71.6332
chr12	862471	+	Exon	NM_001184985,NM_014823,NM_018979,NM_213655	3.72214e-13	-71.6252
chr16	58499075	-	Promoter	NM_022910	5.91177e-27	-71.6176
chr15	75917741	-	Promoter	NM_001042581,NM_005701	7.27923e-08	-71.6086
chr17	73083408	+	Promoter	NM_001271765	3.24451e-09	-71.5923
chr11	70010593	-	Intron	NM_018043,NR_030691	4.26435e-06	-71.5888
chr3	153840177	-	Exon	NM_001251962,NM_001251963,NM_015595	5.17972e-22	-71.573
chr22	46260072	-	-	-	2.46259e-17	-71.5652
chr16	58499113	-	Promoter	NM_022910	1.28773e-26	-71.5643
chr10	101492140	-	Exon	NM_004376,NM_078470	6.20733e-12	-71.5609
chr3	51429283	+	Exon	NM_013286	9.84267e-10	-71.5419
chr1	3459985	-	Intron	NM_001409	0.000138131	-71.5408
chr11	3600896	+	-	-	7.70418e-09	-71.5385
chr3	153840175	-	Exon	NM_001251962,NM_001251963,NM_015595	3.47797e-22	-71.5374
chrX	135579583	+	Exon	NM_001163280	8.68012e-08	-71.5352
chr3	153840110	-	Exon	NM_001251962,NM_001251963,NM_015595	3.47797e-22	-71.5057
chr19	2513574	+	Exon	NM_052847	1.61712e-08	-71.4901
chr2	162758551	-	Intron	NM_001178015,NM_001178016,NM_022058	1.70414e-11	-71.4807
chr3	153840192	-	Exon	NM_001251962,NM_001251963,NM_015595	1.21791e-21	-71.4743
chr8	95639866	-	-	-	9.28252e-07	-71.4565
chr19	30017103	-	Promoter	NM_001146339	5.1119e-20	-71.4296
chr7	182618	+	-	-	9.17294e-13	-71.4286
chr12	63396631	+	-	-	0.000137828	-71.4286
chr14	71787745	+	-	-	4.66259e-11	-71.4222
chr18	3558521	-	Intron	NM_001003809,NM_001242761,NM_001242762,NM_001242763,NM_001242764,NM_001242765,NM_001242766,NM_004746	2.33216e-08	-71.4178
chr17	81009643	-	Exon	NM_001009905	0.000235832	-71.4029
chr19	40772370	+	Intron	NM_001243028	7.50564e-09	-71.4016
chr11	1594140	-	Exon	NR_021489	0.000100047	-71.395
chr6	37106285	+	-	-	8.87057e-05	-71.3942
chr4	128544428	-	-	-	7.90845e-12	-71.3911
chr19	57894002	-	-	-	0.00104307	-71.3889
chr17	81009552	-	Promoter	NM_001009905	0.000235832	-71.3883
chr1	155247370	-	Exon	NM_020897,NR_073074	1.2274e-25	-71.3882
chr2	121200419	+	-	-	2.83203e-08	-71.3875
chr9	3526906	-	Promoter	NM_002919,NM_134428	6.93644e-18	-71.383
chr17	45924642	-	Exon	NM_001258248,NM_199262	2.82208e-10	-71.3828
chr6	111133417	-	Intron	NM_015076	1.6446e-13	-71.3816
chr1	11561490	-	Exon	NM_020780	4.31621e-07	-71.3783
chr3	66671555	-	-	-	1.03344e-05	-71.369
chr11	420661	-	Intron	NM_001012302	0.00194022	-71.3614
chr20	60322360	+	Intron	NM_001252338,NM_001252339,NM_001794	4.47331e-12	-71.3542
chr19	30017118	-	Promoter	NM_001146339	5.11216e-20	-71.3494
chr14	95515286	-	-	-	7.09462e-08	-71.3487
chr5	2738996	-	-	-	3.10748e-07	-71.345
chr17	34900600	+	Promoter	NM_024835	3.02483e-23	-71.3429
chr7	629909	+	Intron	NM_001164758,NM_001164759,NM_001164760,NM_001164761,NM_001164762,NM_002735	8.65573e-09	-71.3333
chr20	62160634	-	Exon	NM_001256358,NM_005975	1.89115e-14	-71.3253
chr12	54541190	-	-	-	1.48611e-07	-71.3158
chr11	1375242	+	-	-	2.25568e-08	-71.3121
chr1	1680269	+	-	-	0.000124788	-71.3095
chr17	35766853	-	Exon	NM_198834,NM_198839	9.97751e-27	-71.3077
chr12	31366478	+	-	-	3.9963e-06	-71.3027
chr3	51429232	+	Exon	NM_013286	1.30504e-09	-71.2977
chr3	50463150	-	Intron	NM_001005505,NM_001174051,NM_006030	6.57354e-08	-71.2868
chr14	71787722	+	-	-	4.66259e-11	-71.2834
chr1	894684	-	Promoter	NM_015658	7.32277e-06	-71.2713
chr5	178548650	+	Intron	NM_014244	1.85364e-24	-71.2686
chrX	128903445	+	Exon	NM_003399	3.6057e-16	-71.2583
chr17	45924698	-	Exon	NM_001258248,NM_199262	6.06082e-10	-71.2442
chr22	46458011	+	-	-	3.04722e-09	-71.2431
chr14	104011566	+	-	-	3.59673e-21	-71.2394
chr19	51274702	-	Exon	NM_001506	1.83291e-14	-71.2393
chr2	121200535	+	-	-	0.000209526	-71.2336
chr2	121200538	+	-	-	0.000209526	-71.2336
chr17	30244358	+	-	-	1.01865e-17	-71.2267
chr8	48650289	+	Exon	NM_005195	1.5788e-23	-71.2193
chr8	143085412	-	-	-	0.000582643	-71.2184
chr19	30017036	-	Promoter	NM_001146339	5.11233e-20	-71.2103
chr11	63834930	-	Intron	NM_014067	0.00278307	-71.2055
chr7	149489049	-	-	-	4.10687e-17	-71.1982
chr1	895086	-	Promoter	NM_015658	0.0014845	-71.1981
chr9	133769443	-	Promoter	NM_198180	2.71123e-11	-71.1707
chr15	40331961	-	Promoter	NM_003134	3.24599e-23	-71.1707
chr14	71787666	+	-	-	2.92088e-11	-71.1564
chr2	71787093	-	Intron	NM_001130455,NM_001130976,NM_001130977,NM_001130978,NM_001130979,NM_001130980,NM_001130981,NM_001130982,NM_001130983,NM_001130984,NM_001130985,NM_001130986,NM_001130987,NM_003494	4.99182e-25	-71.1492
chr14	104584172	+	Promoter	NR_029620	1.52384e-05	-71.1452
chr10	114943847	+	-	-	0.00027545	-71.129
chrX	24043580	+	Intron	NM_030624	0.00208921	-71.1278
chrX	24043597	+	Intron	NM_030624	0.00208921	-71.1278
chrX	24043613	+	Intron	NM_030624	0.00208921	-71.1278
chrX	24043621	+	Intron	NM_030624	0.00208921	-71.1278
chrX	24043656	+	Intron	NM_030624	0.00208921	-71.1278
chrX	24043665	+	Intron	NM_030624	0.00478249	-71.1278
chr19	1234651	-	Exon	NM_152769	7.1519e-17	-71.1268
chrX	132091171	-	Exon	NM_001077188,NM_147175	2.94412e-16	-71.1215
chr22	41616550	+	Intron	NM_031488	4.66602e-17	-71.1162
chr1	247681517	-	-	-	5.18199e-05	-71.098
chr6	166075212	-	Promoter	NM_001130690,NR_045597	6.09105e-09	-71.0897
chr19	41036808	-	Promoter	NM_025213	1.14498e-15	-71.0716
chr6	66105005	-	Intron	NM_001142800,NM_001142801,NM_198283	4.13032e-11	-71.07
chr6	166075134	-	Promoter	NM_001130690,NR_045597	6.64614e-09	-71.0654
chr6	166075208	-	Promoter	NM_001130690,NR_045597	6.64614e-09	-71.0654
chr17	45924692	-	Exon	NM_001258248,NM_199262	6.25149e-10	-71.0623
chr17	45924700	-	Exon	NM_001258248,NM_199262	6.25149e-10	-71.0623
chr15	101478016	+	Intron	NM_024652	8.69135e-06	-71.0569
chr19	717730	+	Intron	NM_001040134,NM_002579	2.2426e-16	-71.0526
chr17	35423586	+	-	-	1.25266e-06	-71.0526
chr14	99681085	-	Intron	NM_138576	0.00143218	-71.0526
chr16	57496613	-	Exon	NM_032940	0.000239885	-71.049
chr9	116998832	-	-	-	7.62145e-05	-71.0435
chr15	75917726	-	Promoter	NM_001042581,NM_005701	6.9864e-08	-71.0254
chr19	41036737	-	Promoter	NM_025213	1.14498e-15	-71.0214
chr19	41036795	-	Promoter	NM_025213	1.14498e-15	-71.0214
chr10	851942	-	-	-	3.20911e-06	-71.0197
chr18	4454963	-	Promoter	NM_001242761,NM_004746	5.66655e-15	-71.0131
chr19	51171779	+	Exon	NM_016148	6.91321e-06	-71.013
chr9	66456269	+	-	-	8.34179e-07	-71.0103
chr14	71787762	+	-	-	3.56624e-11	-71.0074
chr14	34529603	-	-	-	0.00287738	-70.9959
chr5	176934866	-	Intron	NM_001144876	4.7257e-15	-70.9823
chr8	41594081	-	Intron	NM_000037,NM_001142446,NM_020475,NM_020476,NM_020477	6.08243e-07	-70.9792
chrX	130037116	+	Exon	NM_006375,NM_182314	3.33453e-09	-70.9716
chr1	1120721	-	Exon	NM_153254	0.000635574	-70.9336
chr11	126390970	+	Intron	NM_001161707,NM_032531	1.82878e-12	-70.9302
chr17	18054154	-	-	-	0.000532045	-70.9302
chr22	50969702	+	Exon	NM_001014440	0.000111196	-70.9265
chr14	94640367	+	Promoter	NM_020958,NM_058237	1.61478e-07	-70.9239
chr3	170626199	+	Promoter	NM_020390	0.000706813	-70.9218
chr17	71744788	-	-	-	0.000519591	-70.9177
chr14	105440730	-	Intron	NM_138420	5.63193e-05	-70.9091
chr12	48719619	-	-	-	0.000130955	-70.9064
chr3	123420351	+	-	-	8.56623e-20	-70.9043
chr12	122277185	+	-	-	8.6873e-09	-70.8966
chr2	237297885	+	Intron	NM_001270585,NR_073043	0.000132953	-70.8911
chr3	14190880	+	Intron	NM_001145769,NM_004628,NR_027299	1.89852e-09	-70.8839
chr14	94640459	+	Promoter	NM_020958,NM_058237	1.61478e-07	-70.8838
chr6	166075214	-	Promoter	NM_001130690,NR_045597	9.33057e-09	-70.8799
chr8	124084730	+	Promoter	NM_001145088,NM_145647	0.000457992	-70.8333
chr8	124084736	+	Promoter	NM_001145088,NM_145647	0.000457992	-70.8333
chr8	124084878	+	Promoter	NM_001145088,NM_145647	0.000457992	-70.8333
chr8	124084903	+	Promoter	NM_001145088,NM_145647	0.000457992	-70.8333
chr8	124084906	+	Promoter	NM_001145088,NM_145647	0.000457992	-70.8333
chr3	185613259	-	-	-	0.00207176	-70.8333
chr6	166075204	-	Promoter	NM_001130690,NR_045597	6.64614e-09	-70.832
chr17	1483508	-	Intron	NM_152346	2.17804e-20	-70.7921
chr2	206547139	+	Promoter	NM_003872,NM_018534,NM_201264,NM_201266,NM_201267,NM_201279	1.72349e-08	-70.7825
chr12	862607	+	Exon	NM_001184985,NM_014823,NM_018979,NM_213655	1.79524e-13	-70.7788
chr1	894687	-	Promoter	NM_015658	1.71177e-05	-70.7777
chr16	87753793	+	Intron	NM_001184854,NM_001184856,NM_017566	9.70842e-10	-70.7711
chr12	113545072	-	-	-	2.62884e-16	-70.7692
chr6	167600190	-	-	-	1.86926e-08	-70.7692
chr5	134369771	-	Exon	NM_002653	5.44157e-25	-70.7552
chr18	4454969	-	Promoter	NM_001242761,NM_004746	5.66656e-15	-70.7471
chr18	4454910	-	Promoter	NM_001242761,NM_004746	1.12719e-14	-70.7471
chr10	29214207	+	-	-	7.20005e-09	-70.747
chr14	71787677	+	-	-	4.66259e-11	-70.7466
chr14	71787689	+	-	-	4.66259e-11	-70.7466
chr14	71787734	+	-	-	4.66259e-11	-70.7466
chr14	71787739	+	-	-	4.66259e-11	-70.7466
chr14	71787748	+	-	-	4.66259e-11	-70.7466
chr14	71787752	+	-	-	4.66259e-11	-70.7466
chr14	71787757	+	-	-	4.66259e-11	-70.7466
chr16	57496580	-	Exon	NM_032940	0.000239885	-70.7459
chr16	57496586	-	Exon	NM_032940	0.000239885	-70.7459
chr16	57496589	-	Exon	NM_032940	0.000239885	-70.7459
chr16	57496600	-	Exon	NM_032940	0.000239885	-70.7459
chr16	57496611	-	Exon	NM_032940	0.000239885	-70.7459
chr16	57496750	-	Promoter	NM_032940	0.000239885	-70.7459
chr16	57496761	-	Promoter	NM_032940	0.000239885	-70.7459
chr12	131746650	+	-	-	5.64404e-13	-70.7346
chr7	47674969	+	-	-	3.7128e-10	-70.7335
chr6	166075127	-	Promoter	NM_001130690,NR_045597	6.09105e-09	-70.7318
chr18	9855599	-	Intron	NM_006868	7.98135e-15	-70.7081
chr22	38060972	+	Intron	NM_020315	1.30472e-10	-70.6944
chr15	90688862	+	-	-	9.53099e-05	-70.6897
chr6	108444962	+	-	-	2.42834e-39	-70.6889
chr11	65582810	+	-	-	1.83177e-05	-70.6866
chr1	1120735	-	Exon	NM_153254	0.000839712	-70.6845
chr5	140744549	-	Exon	NM_018918	8.84317e-11	-70.6818
chr1	2025718	-	Intron	NM_002744	7.81874e-08	-70.6806
chr16	19737536	+	Intron	NM_153208	1.24877e-06	-70.6754
chr9	126792089	-	Intron	NM_004789	2.74832e-16	-70.6707
chrX	24043626	+	Intron	NM_030624	0.00208923	-70.6656
chr16	57496591	-	Exon	NM_032940	0.000239885	-70.6535
chr14	94640373	+	Promoter	NM_020958,NM_058237	1.61478e-07	-70.6522
chr14	94640398	+	Promoter	NM_020958,NM_058237	1.61478e-07	-70.6522
chr14	94640449	+	Promoter	NM_020958,NM_058237	1.61478e-07	-70.6522
chr14	94640463	+	Promoter	NM_020958,NM_058237	1.61478e-07	-70.6522
chr14	94640476	+	Promoter	NM_020958,NM_058237	1.61478e-07	-70.6522
chr14	94640485	+	Promoter	NM_020958,NM_058237	1.61478e-07	-70.6522
chr2	241712579	-	Exon	NM_001244008,NM_004321	1.21374e-30	-70.6469
chr16	88450196	-	-	-	0.000525574	-70.645
chr14	24711412	+	Exon	NM_001099274,NM_012461	5.40159e-11	-70.6416
chr6	166075231	-	Promoter	NM_001130690,NR_045597	1.48825e-08	-70.6405
chr9	32525543	-	Promoter	NM_014314	3.55021e-06	-70.6292
chr1	3103126	+	Intron	NM_022114,NM_199454	2.41614e-13	-70.6278
chr18	77377731	+	-	-	3.57703e-07	-70.6156
chrX	75649437	-	Exon	NM_020932	1.15133e-20	-70.6116
chr1	4117450	+	-	-	1.67183e-08	-70.6076
chr1	17313214	-	Intron	NM_001141974	5.91641e-08	-70.6073
chr16	16242213	+	-	-	8.1451e-09	-70.6058
chr14	71787713	+	-	-	4.6626e-11	-70.5985
chr14	71787741	+	-	-	4.6626e-11	-70.5985
chr20	21172648	+	Intron	NM_001163022,NM_001163023,NM_018474	3.32351e-15	-70.5952
chr14	105332698	-	Intron	NM_015005	2.60353e-14	-70.5906
chr17	1957339	-	-	-	0.000141008	-70.5882
chr20	57415045	-	Exon	NM_016592	3.0281e-05	-70.5577
chr2	145406242	+	-	-	6.58164e-09	-70.5556
chr18	4454971	-	Promoter	NM_001242761,NM_004746	1.95286e-14	-70.5544
chr21	43375766	+	-	-	3.19057e-07	-70.5514
chr7	1850309	+	-	-	9.43296e-23	-70.5388
chr12	131865874	+	-	-	0.000340492	-70.5357
chr10	134459945	+	Intron	NM_005539	0.00254483	-70.5357
chr3	69249642	-	Intron	NM_015123	1.37198e-11	-70.5064
chr16	1991447	+	Intron	NM_016332	8.35937e-07	-70.5034
chr18	4454917	-	Promoter	NM_001242761,NM_004746	4.51827e-14	-70.4938
chr3	170626193	+	Promoter	NM_020390	0.000707899	-70.4907
chr3	170626195	+	Promoter	NM_020390	0.000707899	-70.4907
chr3	170626235	+	Promoter	NM_020390	0.000707899	-70.4907
chr3	170626256	+	Promoter	NM_020390	0.000707899	-70.4907
chr16	75929124	-	-	-	0.000275543	-70.4907
chr1	10874030	-	-	-	1.39109e-13	-70.4858
chr1	235805501	-	Intron	NM_004485	4.94213e-07	-70.485
chr11	67033726	-	Promoter	NM_001619	1.37106e-23	-70.4802
chr7	152255990	+	-	-	0.000136181	-70.4545
chr5	42924481	+	-	-	6.9406e-12	-70.4469
chr19	39826269	+	Promoter	NM_004877	7.99087e-27	-70.442
chr2	241289102	-	-	-	0.00456942	-70.4391
chr19	49314423	-	Promoter	NM_001164773,NM_001190,NR_028450	5.14847e-15	-70.4283
chr2	233766659	-	Intron	NM_001114090,NM_019850	7.01939e-33	-70.4185
chr15	92199175	-	-	-	1.03623e-05	-70.4167
chr17	1844913	-	Intron	NM_178568	3.32853e-12	-70.4164
chr19	10171501	+	Intron	NR_027300	9.66756e-09	-70.4124
chr3	40822394	-	-	-	3.28831e-26	-70.4113
chr14	94640392	+	Promoter	NM_020958,NM_058237	1.61478e-07	-70.3804
chr14	94640452	+	Promoter	NM_020958,NM_058237	1.61478e-07	-70.3804
chr8	145050187	+	Promoter	NM_000445	0.000648495	-70.3679
chr3	71481587	-	Intron	NM_001012505,NM_001244808,NM_001244810,NM_001244816,NM_032682	3.89832e-14	-70.3648
chr13	50070672	+	Promoter	NM_001040443	0.000213099	-70.3619
chr11	2154340	-	Exon	NM_000612,NM_001007139,NM_001127598	3.46597e-13	-70.3583
chr10	116164377	-	Exon	NM_001001936,NM_032550	2.80808e-16	-70.3553
chr1	155392341	-	Intron	NM_018489	2.23151e-10	-70.339
chr19	1026646	-	Exon	NM_004368,NM_201277	1.62195e-07	-70.3378
chr16	727067	-	Promoter	NM_003961	3.4452e-05	-70.3222
chr8	96285319	+	Intron	NR_038209	9.3905e-06	-70.3125
chr20	47002724	-	-	-	0.00175709	-70.3081
chr3	193531265	+	-	-	0.000252356	-70.3076
chr19	41036732	-	Promoter	NM_025213	5.83761e-15	-70.3024
chr16	88463337	+	-	-	4.73379e-09	-70.2927
chr19	36612599	+	Exon	NM_001281	3.54442e-06	-70.2899
chr18	4454869	-	Promoter	NM_001242761,NM_004746	1.66158e-14	-70.2884
chr18	4454895	-	Promoter	NM_001242761,NM_004746	1.66158e-14	-70.2884
chr18	4454897	-	Promoter	NM_001242761,NM_004746	1.66158e-14	-70.2884
chr18	4454901	-	Promoter	NM_001242761,NM_004746	1.66158e-14	-70.2884
chr18	4454951	-	Promoter	NM_001242761,NM_004746	1.66158e-14	-70.2884
chr18	4454954	-	Promoter	NM_001242761,NM_004746	1.66158e-14	-70.2884
chr18	4454960	-	Promoter	NM_001242761,NM_004746	1.66158e-14	-70.2884
chr18	4454966	-	Promoter	NM_001242761,NM_004746	1.66158e-14	-70.2884
chr18	4454975	-	Promoter	NM_001242761,NM_004746	1.66158e-14	-70.2884
chr18	4454991	-	Promoter	NM_001242761,NM_004746	1.66158e-14	-70.2884
[truncated: 29,280 more rows]

## Sheet: 8 weeks PC right
Asymmetrically methylated CpG sites in the right spinal cord at 8 weeks PC
Chr	Position	Strand	Feature	GeneID	p value	mean methylation difference
chr11	1854428	-	-	-	1.4492e-27	100
chr8	843167	-	Intron	NR_073397,NR_073466	2.17647e-22	100
chr7	6210226	+	-	-	2.18599e-15	100
chr19	3110151	-	Exon	NM_002067	3.72419e-15	100
chr19	3204878	-	Intron	NM_020170	9.73666e-08	100
chr7	1325126	-	-	-	8.66075e-07	100
chr4	1655187	-	Intron	NM_001013622,NM_001174070	5.63619e-06	100
chr7	5372768	+	Intron	NM_001080495	3.06573e-05	100
chr7	636590	+	Intron	NM_001164758,NM_001164759,NM_001164760,NM_001164761,NM_001164762,NM_002735	0.00174564	100
chr16	1828554	+	-	-	2.15414e-11	99.1935
chr19	3313750	+	-	-	1.77816e-08	99.1379
chr18	9967966	+	-	-	9.69108e-27	99
chr17	4560262	-	-	-	1.60485e-22	98.9796
chr1	2895884	-	-	-	4.27697e-12	98.6667
chr2	23854387	+	Intron	NM_052920	7.38268e-18	98.5714
chr16	714975	-	Intron	NM_145294	0.00031176	98.3333
chr1	5005129	+	-	-	1.29482e-21	98
chr2	690037	-	-	-	3.72825e-09	97.8261
chr1	1168465	+	Exon	NM_080605	4.22666e-06	97.3684
chr22	19166360	-	Promoter	NM_001256534,NR_033687	1.22885e-15	96.9697
chr7	1021952	+	Promoter	NM_017781	7.48922e-19	96
chr17	20744761	-	-	-	2.179e-05	95.8118
chr1	940202	-	-	-	3.58803e-06	95.5556
chr7	1021947	+	Promoter	NM_017781	7.48922e-19	95.5192
chr7	574366	+	-	-	9.53629e-13	94.7602
chr7	961442	+	Intron	NM_006869	1.17943e-10	94.6809
chr22	19166344	-	Promoter	NM_001256534,NR_033687	6.48309e-12	93.5913
chr22	19166355	-	Promoter	NM_001256534,NR_033687	6.48309e-12	93.5913
chr22	19166364	-	Promoter	NM_001256534,NR_033687	6.48309e-12	93.5913
chr22	19166291	-	Exon	NM_005984,NR_046298	6.48309e-12	93.5913
chr22	19166296	-	Exon	NM_005984,NR_046298	6.48309e-12	93.5913
chr22	19166300	-	Exon	NM_005984,NR_046298	6.48309e-12	93.5913
chr22	19166302	-	Exon	NM_005984,NR_046298	6.48309e-12	93.5913
chr22	19166318	-	Exon	NM_005984,NR_046298	6.48309e-12	93.5913
chr22	19166323	-	Exon	NM_005984,NR_046298	6.48309e-12	93.5913
chr22	19166325	-	Exon	NM_005984,NR_046298	6.48309e-12	93.5913
chr22	19166332	-	Exon	NM_005984,NR_046298	6.48309e-12	93.5913
chr12	11766137	+	-	-	1.16172e-09	93.4783
chr19	7619314	-	-	-	3.86108e-15	93.1669
chr17	4440178	-	Intron	NM_001124758	7.05662e-10	92.5
chr8	876928	-	Intron	NR_073397,NR_073466	5.97439e-17	92.053
chr17	4560236	-	-	-	3.17884e-17	91.6667
chr19	1843381	-	Intron	NM_020695	6.02205e-07	91.3043
chr19	1843399	-	Intron	NM_020695	6.02205e-07	91.3043
chr8	689881	+	Intron	NR_073397,NR_073466	1.99874e-10	91.25
chr19	4042989	+	-	-	1.14633e-16	91.0907
chr2	5648381	-	-	-	4.48878e-26	90.8262
chr19	7711577	-	Intron	NM_001127396,NM_006949	6.09728e-29	90.7005
chr9	5040823	+	Intron	NM_004972	1.04385e-07	90.3846
chr1	16720213	+	Intron	NM_001114600,NM_015609	6.03873e-09	90.3226
chr1	7013924	-	Intron	NM_015215	1.50725e-14	90.3157
chr19	14664808	+	Intron	NM_138501,NR_038103,NR_038104	0.000294648	90
chr22	20198644	-	-	-	0.0030143	90
chr5	1840348	-	-	-	3.69045e-19	89.7024
chr3	13558145	-	-	-	1.68875e-11	89.6171
chr11	1890419	+	Promoter	NM_001013253	7.72605e-18	89.5522
chr1	14839195	-	-	-	3.99293e-07	89.1566
chr1	14839361	-	-	-	3.99293e-07	89.1566
chr1	1144373	+	-	-	4.02329e-05	89.0351
chr20	6003280	-	Intron	NM_001127458,NM_019095	4.08162e-06	88.9973
chr4	785907	-	Intron	NM_006651	1.69177e-21	88.9816
chr7	1589713	+	Intron	NM_001097620	0.000341871	88.8889
chr7	1799102	-	-	-	3.78368e-14	88.8584
chr7	2115073	-	Intron	NM_001013836,NM_001013837,NM_003550	6.32302e-16	88.8356
chr7	450077	-	-	-	7.41532e-05	88.5714
chr5	171264	+	Intron	NM_052909	5.71062e-09	88.3333
chr19	1433871	+	Intron	NM_170711	2.97882e-10	88.2576
chr22	24251175	+	-	-	2.28452e-06	88.2353
chr11	18477509	-	Exon	NM_001144071	7.15102e-11	88.2268
chr22	24145531	-	-	-	3.80644e-24	88.1571
chr12	3297698	+	Intron	NM_006675	2.43708e-20	88.0952
chr16	2327871	-	Intron	NM_001089	8.34303e-18	87.9205
chr20	6750770	-	Exon	NM_001200	3.25952e-08	87.695
chr20	6750702	-	Intron	NM_001200	3.25952e-08	87.695
chr20	6750704	-	Intron	NM_001200	3.25952e-08	87.695
chr20	6750710	-	Intron	NM_001200	3.25952e-08	87.695
chr20	6750712	-	Intron	NM_001200	3.25952e-08	87.695
chr20	6750730	-	Intron	NM_001200	3.25952e-08	87.695
chr20	6750739	-	Intron	NM_001200	3.25952e-08	87.695
chr20	6750750	-	Intron	NM_001200	3.25952e-08	87.695
chr20	6750753	-	Intron	NM_001200	3.25952e-08	87.695
chr20	6750763	-	Intron	NM_001200	3.25952e-08	87.695
chr19	3381569	-	Intron	NM_001245005,NM_205843	9.91816e-07	87.5
chr2	3698143	-	-	-	4.1579e-13	87.2006
chr8	10907489	-	Intron	NM_173683	0.000453788	86.9821
chr2	2793056	-	-	-	1.54668e-09	86.758
chr19	776166	-	-	-	0.00218079	86.6855
chr16	8746042	-	-	-	8.95737e-06	86.6667
chr1	9551567	+	-	-	7.75837e-11	86.4486
chr16	2029784	+	-	-	3.45341e-12	86.4286
chr19	1443775	+	-	-	9.37381e-05	86.3636
chr1	6994204	+	Intron	NM_015215	4.3426e-11	86.1111
chr19	5038095	-	Intron	NM_015015	1.53022e-27	86.087
chr20	2733044	-	Exon	NM_001110514	7.17247e-10	86.0337
chr7	636583	+	Intron	NM_001164758,NM_001164759,NM_001164760,NM_001164761,NM_001164762,NM_002735	0.0017529	86.0294
chr19	13207533	-	Exon	NM_001271043,NM_001271044,NM_002501	2.77382e-11	86
chr16	1195843	+	-	-	8.91008e-07	85.9589
chr19	3669834	-	Intron	NM_001195733,NM_012398	1.57321e-18	85.9375
chr11	22405028	-	-	-	0.000550058	85.9375
chr17	1960445	-	Exon	NM_001098202,NM_006497	1.71814e-14	85.9119
chr4	8008287	+	Intron	NM_001130085,NM_001130087,NM_032432	3.89276e-05	85.6532
chr8	22419956	+	Intron	NM_005775	0.000218937	85.5242
chr19	13207557	-	Exon	NM_001271043,NM_001271044,NM_002501	2.77382e-11	85.2958
chr1	9884239	-	Exon	NM_001009566,NM_014944	1.14958e-21	85.2668
chr18	10032810	-	-	-	3.81174e-10	85.0352
chr17	19028755	+	-	-	0.000228366	85
chr8	843186	-	Intron	NR_073397,NR_073466	4.62349e-22	84.8611
chr11	449803	+	Promoter	NM_030783	1.08686e-05	84.827
chr6	13335753	+	-	-	1.21946e-07	84.7854
chr18	10032835	-	-	-	3.81174e-10	84.7222
chr19	19070865	+	-	-	0.000316106	84.7222
chr17	16587143	+	-	-	5.0464e-06	84.6591
chr12	20704828	+	Intron	NM_000921	1.62075e-21	84.4479
chr10	836164	+	-	-	1.69975e-11	84.4398
chr11	537432	+	Promoter	NM_198075	6.86133e-26	84.3958
chr17	20744894	-	-	-	2.179e-05	84.2857
chr17	17602278	+	Intron	NM_030665	1.983e-15	84.2198
chr20	10259577	-	-	-	7.41191e-14	84.154
chr11	2755411	+	Intron	NM_000218,NR_040711	5.73108e-11	84.058
chr19	14098204	-	Intron	NM_002918	3.08786e-07	84.0372
chr11	3239963	+	Exon	NM_001164377	3.94294e-08	83.8983
chr1	3097179	+	Intron	NM_022114,NM_199454	1.36612e-12	83.8857
chr11	17859300	+	Intron	NM_012139	4.33096e-07	83.7721
chr4	785914	-	Intron	NM_006651	4.64487e-17	83.7184
chr17	16256105	-	Promoter	NM_181716	4.02839e-06	83.6623
chr1	1118863	-	Intron	NM_001130045,NM_153254	1.17112e-16	83.6364
chr1	7130079	+	Intron	NM_015215	2.45088e-12	83.6217
chr4	1107264	-	Exon	NM_001131034,NM_001193318,NM_194439	2.66858e-05	83.6207
chr19	1508031	+	-	-	0.00170839	83.5233
chr19	1508069	+	-	-	0.00180858	83.3759
chr19	1508000	+	-	-	0.00192909	83.2058
chr19	1508005	+	-	-	0.00192909	83.2058
chr19	1508014	+	-	-	0.00192909	83.2058
chr19	1508021	+	-	-	0.00192909	83.2058
chr19	1508036	+	-	-	0.00192909	83.2058
chr19	1508042	+	-	-	0.00192909	83.2058
chr16	661103	+	Intron	NM_001172663,NM_001172664,NM_001172665,NM_001172666,NM_021168	4.37772e-27	83.1929
chr17	15502414	-	Intron	NM_006382	0.00656174	83.1034
chr7	450034	-	-	-	6.16262e-05	83.0749
chr16	1195768	+	-	-	2.9579e-19	83.0532
chr19	1508012	+	-	-	0.00205441	83.0357
chr2	2715971	-	-	-	1.36196e-20	83.0228
chr1	19145632	-	-	-	3.02882e-11	82.9135
chr19	1508062	+	-	-	0.0020736	82.8328
chr18	13612050	+	Exon	NM_001003674,NM_001003675	2.46542e-26	82.8246
chr19	563070	-	-	-	0.000967713	82.7597
chr19	1508079	+	-	-	0.00192909	82.7058
chr5	638795	-	Intron	NM_018140	2.78747e-08	82.5815
chr19	1508053	+	-	-	0.00198688	82.5804
chr6	16327740	+	Exon	NM_000332,NM_001128164	4.3618e-08	82.5
chr6	16327702	+	Exon	NM_000332,NM_001128164	4.49084e-08	82.2368
chr7	2060096	+	Intron	NM_001013836,NM_001013837,NM_003550	1.58937e-06	82.0804
chr17	8017917	-	-	-	1.05e-09	81.9676
chr22	21311955	-	-	-	3.85065e-11	81.9625
chr22	21312053	-	-	-	3.85065e-11	81.9625
chr22	21312044	-	-	-	5.06205e-11	81.8964
chr22	21311949	-	-	-	3.85065e-11	81.7362
chr1	2249973	-	-	-	0.00267179	81.7308
chr1	941747	+	-	-	0.000775561	81.5747
chr5	395070	+	Intron	NM_001242412,NM_020731	0.000127931	81.4815
chr19	13260083	-	Intron	NM_001271611	0.00274975	81.4617
chr2	3267504	+	Intron	NM_003310	3.25558e-13	81.4268
chr20	16546337	-	Intron	NM_001199865,NM_001199866,NM_024704	4.67504e-35	81.25
chr19	7810767	-	-	-	3.269e-09	81.25
chr7	1340412	+	-	-	4.00944e-09	81.2121
chr12	3601378	+	Intron	NM_019854	8.50586e-14	81.1913
chrX	9792758	+	Intron	NM_001649	3.94587e-12	81.1765
chr5	1643059	+	-	-	8.23634e-17	81.1664
chr22	21311943	-	-	-	1.57881e-10	81.156
chr1	6316894	-	Intron	NM_207370	1.26441e-05	81.1111
chr21	24343890	+	-	-	3.96705e-14	81.0263
chr20	25067219	+	-	-	2.28516e-05	80.9725
chr19	3381546	-	Intron	NM_001245005,NM_205843	0.00199746	80.8929
chr19	8212321	+	Promoter	NM_032447	3.58102e-11	80.862
chr5	524320	+	Promoter	NM_004174	1.23014e-17	80.8027
chr17	9132661	-	Intron	NM_004822	8.87001e-12	80.7714
chr6	24936142	+	-	-	5.40108e-30	80.5769
chr19	17984432	-	Intron	NM_000453	2.47624e-05	80.5375
chr5	524335	+	Promoter	NM_004174	3.98744e-17	80.4181
chr12	3601370	+	Intron	NM_019854	3.2163e-13	80.3141
chr12	3601380	+	Intron	NM_019854	3.2163e-13	80.3141
chr12	3601355	+	Promoter	NM_019854	3.2163e-13	80.3141
chr12	3601364	+	Intron	NM_019854	3.2163e-13	80.2974
chr19	13984631	-	Promoter	NR_029613	1.27195e-12	80.2941
chr11	3651911	-	Intron	NR_002720	3.57322e-14	80.2613
chr12	3601348	+	Promoter	NM_019854	7.71319e-13	80.2477
chr19	15559079	-	Exon	NM_021241	6.68426e-23	80.2469
chr7	6539860	+	Intron	NM_001145118	2.38511e-07	80.1945
chr16	1994982	+	-	-	2.73693e-07	80.1858
chr12	3601391	+	Intron	NM_019854	8.63704e-13	80.1783
chr12	3601343	+	Promoter	NM_019854	8.63704e-13	80.1106
chr5	1200336	-	-	-	8.52807e-15	80.0502
chr7	6590747	-	Exon	NM_001145118	4.28479e-05	80.0285
chr7	6590761	-	Exon	NM_001145118	4.28479e-05	80.0285
chr17	20799853	+	Promoter	NM_001004306	1.36609e-28	80
chr19	14242183	+	Intron	NM_018154	2.08428e-17	79.9539
chr16	4511569	+	-	-	3.56056e-06	79.7915
chr7	1481250	-	Intron	NM_182924	1.99991e-15	79.7225
chr17	20799823	+	Promoter	NM_001004306	5.00868e-28	79.5455
chr11	2049042	-	-	-	2.05078e-07	79.4872
chr12	3601376	+	Intron	NM_019854	1.17234e-12	79.4202
chr4	1370026	-	Intron	NM_020894	0.000142637	79.3103
chr19	11662615	-	-	-	0.000267172	79.3103
chr19	454435	-	Intron	NM_012435	1.26788e-05	79.304
chr16	11439590	+	Exon	NM_152308	9.65403e-09	79.2017
chr1	2121724	+	Intron	NR_046427	2.58061e-14	79.1667
chr16	11439452	+	Exon	NM_152308	9.65403e-09	79.1162
chr11	1331636	-	Exon	NR_029409	3.1369e-08	79.0528
chr22	18956000	-	-	-	8.02487e-15	78.9722
chr7	419086	+	Promoter	NR_033960	9.88225e-27	78.9619
chr5	355938	+	Intron	NM_001242412,NM_020731	1.23138e-09	78.8926
chr1	2144914	-	Promoter	NR_046424	8.96851e-06	78.7886
chr16	11439445	+	Exon	NM_152308	9.65403e-09	78.7815
chr16	11439465	+	Exon	NM_152308	9.65403e-09	78.7815
chr16	11439471	+	Exon	NM_152308	9.65403e-09	78.7815
chr16	11439476	+	Exon	NM_152308	9.65403e-09	78.7815
chr16	11439478	+	Exon	NM_152308	9.65403e-09	78.7815
chr16	11439599	+	Exon	NM_152308	9.65403e-09	78.7815
chr16	11439601	+	Exon	NM_152308	9.65403e-09	78.7815
chr16	11439605	+	Exon	NM_152308	9.65403e-09	78.7815
chr16	11439632	+	Promoter	NM_152308	9.65403e-09	78.7815
chr16	11439461	+	Exon	NM_152308	1.20651e-08	78.7815
chr11	2019168	-	Promoter	NR_002196	3.70045e-06	78.7731
chr10	1477330	+	Intron	NM_018702	1.88936e-05	78.7234
chr1	15314800	-	Intron	NM_001017999,NM_001018000,NM_001018001,NM_015209,NM_201628	4.85905e-24	78.6943
chr16	682654	-	Exon	NM_053284	4.2714e-14	78.6804
chr4	8061489	+	Intron	NM_001130083,NM_001130084,NM_001130085,NM_001130086,NM_001130087,NM_001130088,NM_032432	5.83885e-14	78.6167
chr16	2531849	+	Intron	NM_001199107,NM_020705	6.73073e-05	78.5714
chr8	11628379	-	Intron	NM_001135747	0.000680485	78.5078
chr1	2168774	+	Intron	NM_003036	0.000144869	78.5
chr5	322514	+	Intron	NM_001242412,NM_020731	2.97088e-29	78.4255
chr19	14072784	-	Exon	NM_002918	6.3473e-09	78.4011
chr16	11439468	+	Exon	NM_152308	9.65403e-09	78.3053
chr11	2036865	+	-	-	5.50397e-09	78.2998
chr1	7130092	+	Intron	NM_015215	2.45088e-12	78.2719
chr4	7300900	+	Intron	NM_020777	6.65043e-21	78.2373
chr1	3633764	+	Intron	NM_001126240,NM_001126241,NM_001126242,NM_001204184,NM_001204185,NM_001204186,NM_001204187,NM_001204188,NM_001204189,NM_001204190,NM_001204191,NM_001204192,NM_005427	4.03852e-12	77.9412
chr21	10885054	+	-	-	1.52421e-10	77.8261
chr16	11439483	+	Exon	NM_152308	9.65403e-09	77.7401
chr12	322637	-	Promoter	NM_001122847	2.84685e-13	77.7168
chr16	4288471	+	Intron	NM_001098814	9.57175e-08	77.7108
chr7	4838425	-	-	-	9.23171e-09	77.7027
chr16	946365	-	Intron	NM_022773,NR_033645,NR_033646	1.01497e-05	77.6949
chr6	3967137	+	-	-	4.04159e-18	77.6704
chr12	9217510	+	Exon	NR_034140	1.62001e-28	77.6664
chr1	7129988	+	Intron	NM_015215	2.45088e-12	77.6547
chr1	10816500	-	Intron	NM_001079843,NM_017766	7.14273e-13	77.6292
chr16	11439597	+	Exon	NM_152308	9.26185e-08	77.4657
chr1	3633771	+	Intron	NM_001126240,NM_001126241,NM_001126242,NM_001204184,NM_001204185,NM_001204186,NM_001204187,NM_001204188,NM_001204189,NM_001204190,NM_001204191,NM_001204192,NM_005427	4.03852e-12	77.451
chr4	1040986	+	-	-	1.64396e-12	77.4414
chr4	1283849	-	Promoter	NM_001017405,NM_005882	1.12453e-12	77.4004
chr4	779569	-	Exon	NM_006651	5.0356e-14	77.3923
chr5	2213672	+	-	-	6.24662e-06	77.3444
chr3	14852327	+	-	-	7.79021e-15	77.3333
chr1	853129	+	-	-	3.6401e-05	77.3305
chr1	9100222	+	-	-	9.3238e-11	77.3256
chr16	450923	-	Promoter	NM_020664	0.00131032	77.2727
chr5	580126	-	-	-	5.69096e-26	77.2648
chr2	8685303	+	-	-	2.36071e-23	77.2613
chr11	1420810	+	Intron	NM_001256627,NM_001256629,NM_003957,NR_046331	5.20958e-06	77.1208
chr17	2932625	+	Intron	NM_001100398,NM_015085	9.18879e-07	76.9275
chr7	974583	+	Intron	NM_006869	3.80099e-23	76.9132
chr4	1196092	-	Intron	NR_024569	2.52296e-05	76.9055
chr19	9979962	-	Intron	NM_058164	6.21729e-08	76.8478
chr1	1963784	-	-	-	2.04339e-21	76.7516
chr1	2350904	+	-	-	5.47308e-10	76.699
chr1	6407864	-	Intron	NM_007274,NM_181864,NM_181865,NM_181866	1.15082e-05	76.6667
chr16	11439447	+	Exon	NM_152308	2.90759e-07	76.6415
chr1	17644425	+	Intron	NM_012387	4.54966e-07	76.5971
chr19	499213	-	Intron	NM_130762	6.04361e-24	76.5789
chr1	5540907	-	-	-	1.18159e-08	76.5
chr19	18258531	+	Intron	NM_015016	2.19948e-26	76.4842
chr22	18429846	+	Intron	NM_001122731,NM_001136004,NM_015241	2.78355e-07	76.4666
chr3	13036135	-	Intron	NM_001134382	6.65475e-08	76.46
chr19	1261835	+	-	-	4.27435e-08	76.4462
chr1	9070259	-	Exon	NM_207420	0.000204169	76.4262
chr19	5357286	-	-	-	0.000209761	76.381
chr16	4968923	-	Intron	NM_002705	5.98553e-08	76.3397
chr17	7975795	+	-	-	1.94824e-12	76.3203
chr19	2291274	-	Exon	NM_001101391	3.06763e-14	76.2492
chr16	3971965	+	-	-	1.78117e-13	76.2407
chr17	7975747	+	-	-	1.25523e-08	76.1357
chr1	9100264	+	Intron	NM_003039	1.20583e-09	75.9524
chr19	10265350	+	Exon	NM_001130823,NM_001379	6.4181e-07	75.9259
chr1	3229873	-	Intron	NM_022114,NM_199454	1.51295e-05	75.9048
chr20	2786353	-	-	-	1.6025e-06	75.8772
chr10	2978073	+	-	-	7.98095e-27	75.8621
chr21	14752254	+	-	-	1.32559e-14	75.8353
chrY	23628826	-	-	-	4.43257e-10	75.6495
chr16	19606552	+	Intron	NM_020314	8.70174e-13	75.6463
chr7	25154137	-	-	-	1.21401e-06	75.6373
chr1	1470923	+	-	-	4.35742e-05	75.6098
chr11	824149	+	Intron	NM_020376	4.42197e-16	75.5808
chr7	1785254	-	Exon	NM_001128636	3.11335e-17	75.5427
chr19	12782192	+	Intron	NM_001099737,NM_032332,NR_029375	9.30868e-06	75.5262
chr1	4660270	-	-	-	4.37243e-08	75.5102
chr4	994783	+	Intron	NM_000203	0.00477149	75.4902
chr17	4560265	-	-	-	4.76902e-16	75.4627
chr2	10356951	-	-	-	6.52221e-18	75.435
chr1	19042554	-	Intron	NM_001135254,NM_002584,NM_013945	8.29213e-14	75.4113
chr7	1570562	-	Promoter	NM_002360	4.75029e-10	75.3922
chr7	4301051	-	Intron	NM_001079653,NM_152744	0.000589048	75.3015
chr19	12443667	-	Promoter	NM_145276	0.000170425	75.2492
chr6	2765770	-	Exon	NM_020135,NM_130395	2.06281e-24	75.2246
chr19	1468613	+	Exon	NM_005883	1.21333e-15	75.2083
chr11	2480926	+	Intron	NM_000218	4.66127e-14	75.1582
chr1	23082837	+	Intron	NM_004442,NM_017449	1.48969e-15	75.1471
chr18	3216075	-	Intron	NM_003803,NM_019856	1.67843e-07	75.1037
chr19	5143900	-	Intron	NM_015015	0.000362407	75.0588
chr11	14928078	+	-	-	3.43399e-08	75
chr17	21901578	-	-	-	4.13664e-07	75
chr11	279725	-	Intron	NM_138329	3.94688e-08	74.9477
chr9	19000203	+	Intron	NM_153707	3.23139e-07	74.9206
chr11	2221178	-	-	-	1.84515e-05	74.9034
chr19	783473	+	-	-	8.47693e-12	74.8997
chr7	2678030	+	Intron	NM_025250	2.37791e-09	74.8918
chr16	615926	+	-	-	1.01165e-07	74.8899
chr7	612749	-	Intron	NM_001164758,NM_001164759,NM_001164760,NM_001164761,NM_001164762,NM_002735	1.16712e-20	74.8302
chr20	2201461	-	-	-	0.00270707	74.7967
chr16	4846869	-	-	-	1.52311e-05	74.7685
chr17	18904169	+	Intron	NM_152351,NR_073067	0.00107873	74.6646
chr19	1843582	-	Intron	NM_020695	5.14954e-06	74.6617
chr17	7975756	+	-	-	1.55004e-08	74.6476
chr17	7975772	+	-	-	1.55004e-08	74.6476
chr6	2902972	-	Promoter	NM_004155	0.000688073	74.6032
chr19	3950968	-	-	-	2.27239e-10	74.5902
chr5	5308073	-	Intron	NM_139056	9.12613e-31	74.5737
chr22	24145453	-	Intron	NM_001007468,NM_003073	1.18737e-21	74.5161
chr17	921557	+	Intron	NM_001256847	0.00015123	74.4922
chr8	22069592	-	-	-	7.05528e-07	74.4559
chr10	405226	-	Intron	NM_014974	6.04068e-12	74.3934
chr1	19722367	+	Intron	NM_001206540,NM_004930,NR_038125	1.54682e-25	74.3888
chr4	779499	-	Exon	NM_006651	7.42107e-14	74.3603
chr5	1114522	-	-	-	5.45466e-13	74.359
chr8	1810318	-	Intron	NM_014629	4.9748e-22	74.2924
chr6	2765732	-	Exon	NM_020135,NM_130395	2.06371e-24	74.2568
chr19	17952246	-	Exon	NM_000215	2.54605e-17	74.2028
chr19	9125268	-	-	-	2.17819e-07	74.1667
chr4	779567	-	Exon	NM_006651	8.7897e-14	74.157
chr4	779575	-	Exon	NM_006651	8.7897e-14	74.157
chr11	1250893	-	Intron	NM_002458	2.28533e-15	74.1379
chr19	3721281	-	Promoter	NM_001267561	1.01799e-16	74.0725
chr22	24145519	-	-	-	1.11282e-11	74.0566
chr4	779489	-	Exon	NM_006651	9.87061e-14	74.0454
chr20	486815	+	Intron	NM_177560	2.76593e-07	74.0236
chr22	18267408	+	-	-	1.43155e-05	74.0179
chr18	21067196	+	-	-	6.02735e-08	74.0107
chr11	3186559	-	Exon	NM_001144063,NM_020896	1.61073e-18	73.9883
chr7	2499779	-	-	-	2.68346e-22	73.9565
chr8	22547734	-	Exon	NM_001199880,NM_001199881,NM_004430	3.3311e-19	73.9161
chr8	22597049	-	Intron	NM_144962	0.000426233	73.85
chr19	3613304	-	Exon	NM_001080543,NM_021231	2.41896e-07	73.8487
chr12	562833	+	-	-	8.49274e-11	73.8333
chr8	22547774	-	Exon	NM_001199880,NM_001199881,NM_004430	1.40036e-19	73.808
chr8	22547776	-	Exon	NM_001199880,NM_001199881,NM_004430	1.40036e-19	73.808
chr5	2334801	-	-	-	2.55021e-14	73.764
chr20	2690274	+	-	-	8.52287e-13	73.6858
chr11	3186490	-	Exon	NM_001144063,NM_020896	4.83421e-18	73.6642
chr11	3186492	-	Exon	NM_001144063,NM_020896	4.83421e-18	73.6642
chr11	3186507	-	Exon	NM_001144063,NM_020896	4.83421e-18	73.6642
chr11	3186510	-	Exon	NM_001144063,NM_020896	4.83421e-18	73.6642
chr11	3186512	-	Exon	NM_001144063,NM_020896	4.83421e-18	73.6642
chr11	3186564	-	Exon	NM_001144063,NM_020896	4.83421e-18	73.6642
chr11	3186575	-	Exon	NM_001144063,NM_020896	4.83421e-18	73.6642
chr11	3186484	-	Exon	NM_001144063,NM_020896	5.56386e-18	73.6642
chr1	17901392	-	Intron	NM_018125	6.5022e-11	73.6486
chr11	3186572	-	Exon	NM_001144063,NM_020896	6.00323e-18	73.6465
chr1	9385108	+	Intron	NM_025106	5.45821e-19	73.6016
chr17	2282959	-	Exon	NM_001098509,NM_014853	2.79334e-15	73.6007
chr19	709624	+	Promoter	NM_001040134,NM_002579	3.01678e-15	73.5603
chr16	1420228	+	-	-	4.22406e-10	73.5333
chr4	7647874	+	Intron	NM_020777	3.23173e-19	73.5106
chr7	13953805	+	Intron	NM_001163148,NM_001163149,NM_001163150,NM_001163151,NM_001163152,NM_004956	0.000954062	73.4586
chr19	17566291	-	Exon	NM_138454	2.1002e-13	73.4444
chr8	22547787	-	Exon	NM_001199880,NM_001199881,NM_004430	1.30912e-19	73.4259
chr8	22547725	-	Exon	NM_001199880,NM_001199881,NM_004430	1.30912e-19	73.4259
chr5	1009587	-	Promoter	NM_001271082,NM_033120	1.65291e-13	73.4061
chr1	1238797	+	Intron	NM_030649	0.000220846	73.3457
chr4	3302295	+	-	-	3.97173e-09	73.3333
chr12	2444380	-	Intron	NM_000719,NM_001129827,NM_001129829,NM_001129830,NM_001129831,NM_001129832,NM_001129833,NM_001129834,NM_001129835,NM_001129836,NM_001129837,NM_001129838,NM_001129839,NM_001129840,NM_001129841,NM_001129842,NM_001129843,NM_001129844,NM_001129846,NM_001167623,NM_001167624,NM_001167625,NM_199460	1.63367e-28	73.2609
chr1	936698	+	-	-	6.7807e-19	73.2196
chr19	17952243	-	Exon	NM_000215	1.55541e-13	73.1985
chr11	3186570	-	Exon	NM_001144063,NM_020896	3.7594e-17	73.1969
chr17	18920872	+	Intron	NR_073067	3.52806e-06	73.1579
chr14	21027489	-	Intron	NM_001110358,NM_001110359,NM_001110360,NM_001110361	1.02346e-09	73.1162
chr11	1910660	-	Intron	NM_001013253,NM_001013254,NM_001013255,NM_001242932,NM_002339	5.01188e-06	73.0769
chr19	408037	-	Exon	NM_001136263	7.00355e-06	73.0441
chr8	22547711	-	Exon	NM_001199880,NM_001199881,NM_004430	1.30912e-19	73.0022
chr9	205240	+	-	-	0.000134364	72.9225
chr9	205285	+	-	-	0.000134364	72.9225
chr16	1308081	+	Exon	NM_012217	1.37519e-10	72.9167
chr4	995673	+	Intron	NM_000203	1.6579e-08	72.8675
chr13	21476933	-	Promoter	NM_022459	4.377e-07	72.8611
chr9	6796464	+	Intron	NM_001146694,NM_001146695,NM_001146696,NM_015061	1.25248e-06	72.776
chr5	580094	-	-	-	5.22702e-20	72.7648
chr8	22547706	-	Exon	NM_001199880,NM_001199881,NM_004430	6.78928e-19	72.7593
chr8	22547817	-	Exon	NM_001199880,NM_001199881,NM_004430	6.78928e-19	72.7593
chr9	11411	-	Promoter	NR_051986	4.13491e-29	72.7472
chr7	1973173	-	Intron	NM_001013836,NM_001013837,NM_003550	6.10081e-14	72.7273
chr19	3108516	+	Intron	NM_002067	3.7591e-26	72.682
chr19	11070883	+	Promoter	NM_001128844,NM_003072	1.99107e-24	72.6719
chr1	18026434	-	-	-	4.64501e-10	72.6515
chr18	8784791	+	Exon	NM_015210	2.39152e-06	72.6109
chr19	7734144	-	Promoter	NM_001193374,NM_020415	8.2646e-17	72.595
chr19	1757569	-	Intron	NM_001080488	1.5396e-11	72.5554
chr22	19138349	+	Promoter	NM_005315	1.02877e-27	72.5003
chr3	10207613	+	Intron	NM_001570	1.73869e-21	72.4702
chr19	11434711	+	Exon	NM_004283	1.56719e-17	72.4491
chr4	955765	-	Intron	NM_001347	3.25752e-06	72.3504
chr3	13318773	-	-	-	7.82902e-10	72.3431
chr7	2084699	+	Intron	NM_001013836,NM_001013837,NM_003550	8.50035e-13	72.3373
chr19	9433468	+	Promoter	NM_001202406,NM_001202407,NM_001202408,NM_001202409,NM_001202410,NM_001202411,NM_032497	0.000620582	72.306
chr9	11324	-	Promoter	NR_051986	9.95187e-25	72.2627
chr16	2166255	+	-	-	0.00178453	72.25
chr8	22547810	-	Exon	NM_001199880,NM_001199881,NM_004430	7.65691e-19	72.2429
chr19	1757572	-	Intron	NM_001080488	2.00942e-11	72.242
chr19	1757647	-	Intron	NM_001080488	2.00942e-11	72.242
chr19	1757624	-	Intron	NM_001080488	7.65606e-11	72.242
chr19	1757584	-	Intron	NM_001080488	2.12774e-11	72.2146
chr19	17952175	-	-	-	8.5837e-14	72.2049
chr19	17952282	-	Exon	NM_000215	8.5837e-14	72.2049
chr19	2556806	-	Intron	NM_052847	1.10645e-11	72.1722
chr19	1757645	-	Intron	NM_001080488	2.09097e-11	72.1659
chr12	6917106	+	Intron	NM_001195014,NM_001195015,NM_001195016,NM_001195017	9.52983e-15	72.157
chr19	1757543	-	Intron	NM_001080488	2.20929e-11	72.1385
chr1	865539	-	Exon	NM_152486	6.08685e-06	72.093
chr3	9904139	+	-	-	0.000543409	72.0588
chr19	1757613	-	Intron	NM_001080488	3.01796e-11	72.045
chr4	7593443	+	Intron	NM_020777	9.01487e-12	72.0379
chr19	1757549	-	Intron	NM_001080488	2.26307e-11	72.0346
chr19	1757561	-	Intron	NM_001080488	2.26307e-11	72.0346
chr19	1757576	-	Intron	NM_001080488	2.26307e-11	72.0346
chr19	1757574	-	Intron	NM_001080488	2.41095e-11	71.9576
chr19	1757582	-	Intron	NM_001080488	2.41095e-11	71.9576
chr19	3927542	-	Exon	NM_033064	4.07836e-16	71.9231
chr9	214813	+	Exon	NM_152569	1.92938e-12	71.8801
chr19	1757622	-	Intron	NM_001080488	2.59476e-11	71.88
chr1	24991776	+	Intron	NM_005839	1.58469e-14	71.8721
chr17	16242629	+	-	-	4.91745e-13	71.8093
chr18	10922	+	-	-	9.26053e-38	71.7861
chr19	1419464	+	Intron	NM_018959,NM_170711	2.44422e-11	71.7755
chr14	21027522	-	Intron	NM_001110358,NM_001110359,NM_001110360,NM_001110361	1.15191e-06	71.7532
chr19	4971526	-	Intron	NM_015015	3.17633e-23	71.7085
chr19	4971488	-	Intron	NM_015015	4.72326e-22	71.6571
chr4	12369456	-	-	-	8.78234e-09	71.6374
chr16	1256675	+	Intron	NM_001005407,NM_021098	5.7187e-22	71.6338
chr7	2595205	-	Exon	NM_152743	3.18079e-09	71.5943
chr19	3669813	-	Intron	NM_001195733,NM_012398	9.56641e-17	71.516
chr19	1757558	-	Intron	NM_001080488	4.12094e-11	71.5137
chr12	1905754	-	Intron	NM_172364	2.02515e-14	71.508
chr19	941282	-	Intron	NM_005224	5.66161e-07	71.5054
chr16	5055790	-	-	-	0.00374547	71.5046
chr16	1128279	-	Promoter	NR_027242	0.000200472	71.4489
chr8	22547689	-	Exon	NM_001199880,NM_001199881,NM_004430	2.37224e-20	71.4474
chr16	1956577	+	-	-	5.42254e-10	71.4286
chr19	5892049	-	Exon	NM_001193375	1.17886e-08	71.4286
chr5	7475139	+	Intron	NM_020546	0.00254483	71.4286
chr11	2417407	-	Intron	NM_004356	0.00287631	71.4286
chr7	2595327	-	Exon	NM_152743	3.18079e-09	71.3851
chr11	7110978	-	Exon	NM_014469	2.11405e-25	71.3675
chr11	1331625	-	Exon	NR_029409	3.1369e-08	71.3284
chr9	14949605	-	-	-	3.7579e-15	71.2858
chr16	23702743	+	Exon	NM_033266	4.4407e-14	71.2766
chr1	8410221	-	-	-	2.0871e-05	71.187
chr5	504736	+	Intron	NM_004174	5.28462e-07	71.1864
chr19	1468623	+	Exon	NM_005883	5.73017e-07	71.1324
chr5	3600044	-	Exon	NM_024337	1.03923e-10	71.1284
chr11	12601651	+	-	-	8.83264e-06	71.0999
chr19	1757590	-	Intron	NM_001080488	1.736e-10	71.0911
chr22	20268614	+	-	-	1.12455e-10	71.07
chr19	1757588	-	Intron	NM_001080488	1.79567e-10	71.0137
chr8	22547686	-	Exon	NM_001199880,NM_001199881,NM_004430	1.53369e-17	70.9986
chr19	956436	+	Intron	NM_005224	1.68613e-06	70.9718
chr1	16720051	+	Intron	NM_001114600,NM_015609	0.000436009	70.9677
chr2	1732748	-	Intron	NM_012293	5.47659e-06	70.9494
chr17	1131338	-	-	-	2.21795e-08	70.9167
chr2	10336751	+	Intron	NM_182626	0.000365179	70.8799
chr8	11889386	-	-	-	9.16898e-13	70.8661
chr1	9650340	-	Intron	NM_001010866,NM_001130924	2.95664e-15	70.8333
chr19	6215051	+	-	-	3.76886e-13	70.8333
chr10	8097270	-	Exon	NM_001002295,NM_002051	0.00209362	70.8333
chr19	941277	-	Intron	NM_005224	5.66161e-07	70.8297
chr11	22365215	+	Intron	NM_020346	1.98558e-08	70.8013
chr19	1306550	-	-	-	0.000515033	70.8012
chr13	21649316	-	-	-	8.973e-23	70.7792
chr16	1294939	-	-	-	0.000169166	70.7143
chr7	2595196	-	Exon	NM_152743	6.2069e-09	70.7079
chr19	3381564	-	Intron	NM_001245005,NM_205843	0.00227537	70.6944
chr1	16134313	+	Promoter	NM_001089591	0.00415065	70.6372
chr19	3464802	+	Exon	NM_001245002,NM_001245004,NM_001245005,NM_005597,NM_205843	0.00101968	70.625
chr19	541594	-	Exon	NM_004359	0.000581358	70.6225
chr19	2513142	+	Exon	NM_052847	8.07428e-11	70.5636
chr16	3062969	-	Exon	NM_020982	4.04432e-13	70.5193
chr7	6590752	-	Exon	NM_001145118	0.00155527	70.5078
chr22	22090785	-	Promoter	NM_013313	2.3284e-06	70.4949
chr7	2595212	-	Exon	NM_152743	2.17478e-08	70.4683
chr19	2097444	-	Promoter	NM_001031735,NM_001039846	7.85876e-23	70.462
chr1	1503067	-	Intron	NM_014188	7.8294e-09	70.4579
chr20	4142764	-	Intron	NM_001270691,NM_175839,NM_175840,NM_175841,NM_175842	1.23184e-05	70.4155
chr10	2333044	+	-	-	3.81321e-08	70.4082
chr19	17952221	-	Exon	NM_000215	1.62823e-12	70.3867
chr20	2188421	-	-	-	9.53603e-21	70.3818
chr21	11098693	-	Promoter	NM_001187	1.85035e-07	70.2998
chr1	11708939	+	Intron	NM_012168	3.87552e-13	70.1811
chr3	13461544	+	Promoter	NM_024923	6.68286e-09	70.1322
chr9	214824	+	Exon	NM_152569	9.52121e-12	70.0773
chr9	214844	+	Exon	NM_152569	9.52121e-12	70.0773
chr9	214935	+	Exon	NM_152569	9.52121e-12	70.0773
chr9	214942	+	Exon	NM_152569	9.52121e-12	70.0773
chr9	214965	+	Exon	NM_152569	9.52121e-12	70.0773
chr4	1041046	+	-	-	1.0377e-09	70.0635
chr9	214928	+	Exon	NM_152569	9.52121e-12	70.0583
chr1	12113529	+	-	-	1.33775e-22	70.0166
chr4	15005045	-	Exon	NM_001177381,NM_001177382,NM_001177383,NM_001177384,NM_182485,NM_182646	3.96572e-24	69.9743
chr11	2480893	+	Intron	NM_000218	7.94479e-06	69.973
chr19	1131355	-	Promoter	NM_001100122	8.58609e-11	69.9602
chr11	8289912	+	Intron	NM_001270428	5.28343e-11	69.9487
chr9	214857	+	Exon	NM_152569	1.70172e-11	69.9188
chr7	6590743	-	Exon	NM_001145118	0.00182727	69.9182
chr1	3103141	-	Intron	NM_022114,NM_199454	2.244e-12	69.8985
chr4	6565377	+	Promoter	NM_001206994	1.42001e-16	69.8799
chr17	9480192	-	Promoter	NM_001080556,NM_145054	2.35631e-07	69.8774
chr16	12002207	+	Intron	NM_001130007	3.4611e-05	69.8684
chr16	12002245	+	Intron	NM_001130007	3.4611e-05	69.8684
chr19	2271430	+	Exon	NM_004152	1.17975e-15	69.8669
chr7	6590741	-	Exon	NM_001145118	0.00186549	69.8429
chr22	19138333	+	Promoter	NM_005315	4.15372e-25	69.8327
chr12	95045	+	-	-	1.05436e-09	69.831
chr1	3103230	-	Intron	NM_022114,NM_199454	2.244e-12	69.7955
chr5	1284873	+	Intron	NM_001193376,NM_198253	0.00162873	69.7941
chr19	3317931	+	-	-	3.95037e-05	69.7727
chr4	15004977	-	Exon	NM_001177381,NM_001177382,NM_001177383,NM_001177384,NM_182485,NM_182646	1.36216e-24	69.7701
chr9	214860	+	Exon	NM_152569	1.95919e-11	69.7383
chr7	6590725	-	Exon	NM_001145118	0.00192029	69.7343
chr7	6590775	-	Exon	NM_001145118	0.00192029	69.7343
chr16	1017734	-	Intron	NR_033645	1.38404e-05	69.6886
chr17	3846967	-	Intron	NM_005173,NM_174953,NM_174954,NM_174955,NM_174956,NM_174957,NM_174958	1.38011e-10	69.6809
chr17	9480359	-	Promoter	NM_001080556,NM_145054	1.56663e-07	69.6756
chr9	214944	+	Exon	NM_152569	2.62115e-11	69.6536
chr1	1397525	-	Intron	NM_001039211	9.21159e-16	69.6523
chr1	3103154	-	Intron	NM_022114,NM_199454	2.88964e-12	69.638
chr19	1047184	+	-	-	1.07213e-09	69.6313
chr19	3456212	+	Intron	NM_005597	3.70294e-08	69.5895
chr5	1228444	-	Intron	NM_182632	8.09393e-08	69.5581
chr5	1228456	-	Intron	NM_182632	8.09393e-08	69.5581
chr16	2190418	+	-	-	4.30528e-05	69.5513
chr3	12907943	-	-	-	0.000608942	69.5251
chr19	12251018	+	Promoter	NM_001203250,NM_021143	1.74839e-23	69.5143
chr17	19950177	+	Intron	NM_001243439	2.23402e-08	69.5118
chr16	1419363	-	Intron	NM_001193388,NM_001193389,NM_023076	0.00177143	69.5112
chr7	2595335	-	Exon	NM_152743	3.18079e-09	69.483
chr19	13984904	-	Promoter	NR_029613	6.32811e-10	69.4444
chr14	20929497	+	Promoter	NM_001100814,NM_144568	3.33591e-27	69.3886
chr1	17559421	-	Exon	NM_013358	1.51981e-08	69.3817
chr4	1994727	-	Intron	NM_005663	5.1888e-28	69.3759
chr4	978821	+	Intron	NM_134425	6.6925e-11	69.3677
chr18	2333960	+	-	-	6.66228e-06	69.359
chr5	580188	-	-	-	2.22195e-24	69.3284
chr17	11461347	+	Exon	NM_001173461,NM_001173462,NM_207386	1.33915e-19	69.3252
chr19	2061153	-	-	-	2.57784e-17	69.3188
chr1	10698323	+	Exon	NM_001079843	3.32357e-06	69.3069
chr4	2537992	+	-	-	6.92892e-13	69.3008
chrX	2847550	-	Promoter	NM_001669	1.28434e-11	69.299
chr16	1061652	+	-	-	1.72893e-13	69.2982
chr19	13216115	+	Exon	NM_001136035,NM_001142554,NM_017722	0.000775561	69.287
chr4	15004993	-	Exon	NM_001177381,NM_001177382,NM_001177383,NM_001177384,NM_182485,NM_182646	7.4553e-24	69.2751
chr4	15005032	-	Exon	NM_001177381,NM_001177382,NM_001177383,NM_001177384,NM_182485,NM_182646	7.4553e-24	69.2751
chr4	8645873	-	-	-	7.2757e-10	69.2521
chr4	3761000	+	-	-	9.87937e-07	69.2461
chr20	2739939	-	-	-	2.06593e-09	69.2308
chr4	6964882	+	Intron	NM_001113361,NM_020773	0.000526547	69.2308
chr9	214960	+	Exon	NM_152569	6.99754e-11	69.2299
chr3	13461563	+	Exon	NM_024923	1.61154e-08	69.2235
chr3	13461577	+	Exon	NM_024923	1.61154e-08	69.2235
chr3	13461673	+	Exon	NM_024923	1.61154e-08	69.2235
chr3	13461691	+	Exon	NM_024923	1.61154e-08	69.2235
chr3	13461548	+	Promoter	NM_024923	1.61154e-08	69.2235
chr6	2765752	-	Exon	NM_020135,NM_130395	2.70406e-18	69.2136
chr19	6534944	-	Exon	NM_003811	8.37229e-15	69.1473
chr4	15004996	-	Exon	NM_001177381,NM_001177382,NM_001177383,NM_001177384,NM_182485,NM_182646	1.92112e-23	69.1438
chr19	10853453	+	Intron	NM_001005360,NM_001005361,NM_001005362,NM_001190716,NM_004945	4.12316e-11	69.1281
chr1	20064084	-	Intron	NM_181719	3.57475e-23	69.1209
chr7	3248970	+	-	-	5.59609e-12	69.1055
chr10	6963081	+	-	-	6.04408e-20	69.0929
chrX	3858048	+	-	-	2.2222e-07	69.0909
chr16	939206	-	Intron	NM_022773,NR_033645,NR_033646	1.83355e-18	69.0855
chr19	19337790	+	Exon	NM_004386	1.40633e-09	69.0476
chr1	16974209	+	Intron	NR_027504	2.88025e-17	68.9799
chr4	15004963	-	Exon	NM_001177381,NM_001177382,NM_001177383,NM_001177384,NM_182485,NM_182646	7.4553e-24	68.9278
chr4	15006623	-	Intron	NM_001177381,NM_001177382,NM_001177383,NM_001177384,NM_182485,NM_182646	7.63887e-14	68.9227
chr4	15006627	-	Intron	NM_001177381,NM_001177382,NM_001177383,NM_001177384,NM_182485,NM_182646	7.63887e-14	68.9227
chr4	15006635	-	Intron	NM_001177381,NM_001177382,NM_001177383,NM_001177384,NM_182485,NM_182646	7.63887e-14	68.9227
chr4	15006654	-	Intron	NM_001177381,NM_001177382,NM_001177383,NM_001177384,NM_182485,NM_182646	7.63887e-14	68.9227
chr4	15006658	-	Intron	NM_001177381,NM_001177382,NM_001177383,NM_001177384,NM_182485,NM_182646	7.63887e-14	68.9227
chr16	2042999	-	Exon	NM_004209	4.50918e-06	68.8879
chr4	15005050	-	Exon	NM_001177381,NM_001177382,NM_001177383,NM_001177384,NM_182485,NM_182646	1.18303e-22	68.8814
chr16	3550119	-	Promoter	NM_015041	1.49947e-34	68.8564
chr17	9480364	-	Promoter	NM_001080556,NM_145054	1.56663e-07	68.8468
chr20	2188542	-	-	-	1.20072e-17	68.8299
chr4	2278928	+	Intron	NM_001172656,NM_001172659,NM_020972	1.41722e-24	68.8198
chr1	6238761	-	Intron	NM_015557	9.59055e-06	68.8189
chr1	3229756	-	Intron	NM_022114,NM_199454	1.92106e-09	68.8
chr4	15004960	-	Exon	NM_001177381,NM_001177382,NM_001177383,NM_001177384,NM_182485,NM_182646	2.13856e-23	68.7873
chr7	419266	-	Promoter	NR_033960	1.78617e-16	68.7271
chr4	15004970	-	Exon	NM_001177381,NM_001177382,NM_001177383,NM_001177384,NM_182485,NM_182646	7.4553e-24	68.7256
chr11	281612	+	Exon	NM_138329	5.82964e-11	68.7118
chr20	23029392	-	Exon	NM_000361	1.25266e-20	68.711
chr20	4836913	-	Exon	NM_005116,NM_203327	2.18047e-06	68.6992
chr1	20669893	-	Intron	NM_001039500	9.30319e-16	68.6941
chr20	2188533	-	-	-	3.79145e-17	68.6829
chr18	20751246	-	Intron	NR_023359	0.000245279	68.6829
chr4	15005058	-	Exon	NM_001177381,NM_001177382,NM_001177383,NM_001177384,NM_182485,NM_182646	4.81662e-23	68.6654
chr7	22590207	+	-	-	9.40159e-07	68.6597
chr7	23341174	-	Intron	NM_138446	8.98172e-08	68.6501
chr3	13461670	+	Exon	NM_024923	1.61154e-08	68.6352
chr3	13461685	+	Exon	NM_024923	1.61154e-08	68.6352
chr3	13461550	+	Promoter	NM_024923	1.61154e-08	68.6352
chr6	2765822	-	Exon	NM_020135,NM_130395	2.41361e-17	68.6196
chr20	2188567	-	-	-	1.63844e-17	68.6194
chr19	6535028	-	Exon	NM_003811	6.77125e-14	68.6145
chr5	171282	+	Intron	NM_052909	6.34574e-07	68.6065
chr1	10896004	+	-	-	3.19442e-07	68.5614
chr17	4906772	+	Intron	NM_006612	2.89765e-08	68.5465
chr20	23029352	-	Exon	NM_000361	8.24528e-21	68.5387
chr20	23029369	-	Exon	NM_000361	8.24528e-21	68.5387
chr20	23029378	-	Exon	NM_000361	8.24528e-21	68.5387
chr20	23029380	-	Exon	NM_000361	8.24528e-21	68.5387
chr20	23029404	-	Exon	NM_000361	8.24528e-21	68.5387
chr20	23029419	-	Exon	NM_000361	8.24528e-21	68.5387
chr20	23029423	-	Exon	NM_000361	8.24531e-21	68.5387
chr4	15006676	-	Intron	NM_001177381,NM_001177382,NM_001177383,NM_001177384,NM_182485,NM_182646	7.63887e-14	68.5351
chr4	15006679	-	Intron	NM_001177381,NM_001177382,NM_001177383,NM_001177384,NM_182485,NM_182646	7.63887e-14	68.5351
chr19	12666526	+	-	-	7.56675e-12	68.5338
chr20	2188449	-	-	-	1.63844e-17	68.5155
chr6	2765772	-	Exon	NM_020135,NM_130395	1.1755e-17	68.4995
chr6	2765782	-	Exon	NM_020135,NM_130395	7.80032e-18	68.4784
chr19	18034166	+	-	-	7.35015e-12	68.4748
chr17	704245	+	Exon	NM_001205319,NM_022463	5.73188e-08	68.4682
chr11	857005	-	Intron	NM_001025239	3.45248e-06	68.4371
chr1	2833550	-	-	-	7.80404e-14	68.4239
chr4	15005035	-	Exon	NM_001177381,NM_001177382,NM_001177383,NM_001177384,NM_182485,NM_182646	3.16577e-22	68.3925
chr6	2765730	-	Exon	NM_020135,NM_130395	1.1755e-17	68.387
chr6	2765736	-	Exon	NM_020135,NM_130395	1.1755e-17	68.387
chr6	2765756	-	Exon	NM_020135,NM_130395	1.1755e-17	68.387
chr6	2765792	-	Exon	NM_020135,NM_130395	1.1755e-17	68.387
chr6	2765802	-	Exon	NM_020135,NM_130395	1.1755e-17	68.387
chr6	2765804	-	Exon	NM_020135,NM_130395	1.1755e-17	68.387
chr6	2765808	-	Exon	NM_020135,NM_130395	1.1755e-17	68.387
chr6	2765826	-	Exon	NM_020135,NM_130395	1.1755e-17	68.387
chr1	10819445	+	Intron	NM_001079843,NM_017766	7.79917e-11	68.38
chr4	8006816	+	Intron	NM_001130085,NM_001130087,NM_032432	7.30374e-16	68.3474
chr6	2765765	-	Exon	NM_020135,NM_130395	1.1755e-17	68.3261
chr20	2188458	-	-	-	3.79145e-17	68.3009
chr1	10895964	+	-	-	3.19442e-07	68.2995
chr1	10895978	+	-	-	3.19442e-07	68.2995
chr1	10896032	+	-	-	3.19442e-07	68.2995
chr4	7741900	-	Intron	NM_020777	0.000581975	68.2906
chr10	24927010	-	Intron	NM_020824	0.00213189	68.2692
chr20	2188576	-	-	-	2.10499e-16	68.2519
chr1	1295566	-	-	-	1.57488e-19	68.2336
chr19	3095227	+	Promoter	NM_002067	0.000167245	68.2329
chr1	10895959	+	-	-	1.3505e-07	68.1851
chr1	8292654	-	-	-	2.49093e-09	68.1818
chr17	3819219	+	Intron	NM_002558	4.88774e-08	68.1818
chr7	22590069	+	-	-	1.76217e-14	68.1811
chr3	13461589	+	Exon	NM_024923	3.55519e-08	68.1742
chr6	2765767	-	Exon	NM_020135,NM_130395	1.1755e-17	68.1544
chr6	2765828	-	Exon	NM_020135,NM_130395	1.1755e-17	68.1544
chr20	582050	+	-	-	1.65878e-06	68.1431
chr11	2432762	+	Intron	NM_014555	0.00161862	68.1373
chr14	20929488	+	Promoter	NM_001100814,NM_144568	3.31275e-29	68.1106
chr7	875462	+	Intron	NM_025154	7.24378e-05	68.0754
chr20	23029395	-	Exon	NM_000361	3.00271e-20	68.067
chr16	3550142	-	Promoter	NM_015041	2.34588e-36	68.062
chr17	7975673	+	-	-	7.33e-09	68.0544
chrY	15179844	-	-	-	7.16387e-19	67.9806
chr19	15580674	+	Exon	NM_052890	1.72062e-16	67.9782
chr8	1112281	-	-	-	7.54787e-06	67.9607
chr4	1040988	+	-	-	1.88625e-08	67.9487
chr4	1041053	+	-	-	1.88625e-08	67.9487
chr11	2162283	+	Promoter	NM_001127598	3.76733e-13	67.9167
chr1	10896010	+	-	-	3.34872e-07	67.893
chr19	8575757	+	Exon	NM_001146175	2.40494e-10	67.8662
chr1	11515544	+	-	-	0.00079244	67.8571
chr1	10772782	+	Intron	NM_001079843,NM_017766	4.86116e-07	67.8441
chr8	1765679	+	Promoter	NR_030326	4.3577e-14	67.8183
chr3	9988303	-	Exon	NM_207351	1.17172e-26	67.8176
chr16	661116	+	Intron	NM_001172663,NM_001172664,NM_001172665,NM_001172666,NM_021168	9.3965e-07	67.7931
chr11	1859278	+	Promoter	NM_003282	2.22978e-13	67.7845
chr1	2863090	-	-	-	1.2166e-22	67.7749
chr3	14852274	+	-	-	1.46648e-07	67.7727
chr1	8410230	-	-	-	5.2386e-05	67.7398
chr14	20929430	+	Promoter	NM_001100814,NM_144568	4.29762e-29	67.7305
chr14	20929439	+	Promoter	NM_001100814,NM_144568	4.29762e-29	67.7305
chr1	8282539	+	-	-	9.59307e-05	67.7257
chr16	374210	+	Intron	NM_003502,NM_181050	3.2042e-19	67.7088
chr5	524261	+	Promoter	NM_004174	1.98034e-18	67.6943
chr16	352600	-	Intron	NM_003502,NM_181050	2.11193e-19	67.6923
chr14	20929479	+	Promoter	NM_001100814,NM_144568	9.22219e-29	67.6897
chr19	5110773	+	Exon	NM_015015	2.06842e-07	67.6724
chr1	11900336	-	Exon	NM_001256959,NM_001286,NR_046428	2.54598e-18	67.6652
chr11	3186488	-	Exon	NM_001144063,NM_020896	2.0556e-16	67.6596
chr14	20929403	+	Promoter	NM_001100814,NM_144568	1.36773e-28	67.6539
chr20	23029386	-	Exon	NM_000361	8.24536e-21	67.6296
chr14	20929494	+	Promoter	NM_001100814,NM_144568	4.29762e-29	67.5747
chr14	20929513	+	Promoter	NM_001100814,NM_144568	4.29762e-29	67.5426
chrX	16049983	+	-	-	1.55141e-08	67.5239
chr14	20929516	+	Promoter	NM_001100814,NM_144568	1.096e-28	67.5072
chr7	4174555	-	Intron	NM_001079653,NM_152744	1.78772e-08	67.4885
chr1	1857061	-	-	-	3.42477e-05	67.4845
chr3	14852270	+	-	-	1.46648e-07	67.4754
chr16	2531820	+	Intron	NM_001199107,NM_020705	6.73073e-05	67.4603
chr4	15005052	-	Exon	NM_001177381,NM_001177382,NM_001177383,NM_001177384,NM_182485,NM_182646	1.54231e-21	67.446
chr22	23725724	+	-	-	5.67679e-08	67.4431
chr19	11097369	+	Intron	NM_001128844,NM_001128845,NM_001128846,NM_001128847,NM_001128848,NM_001128849,NM_003072	4.54862e-18	67.4242
chr17	20799792	+	Promoter	NM_001004306	9.00956e-14	67.414
chr16	1061940	-	-	-	1.2709e-26	67.4123
chr1	6542485	+	Intron	NM_020631	9.83026e-07	67.3882
chr3	14852293	+	-	-	1.64217e-07	67.3579
chr10	23361040	-	-	-	3.1987e-11	67.3373
chr4	978740	+	Intron	NM_134425	8.78587e-09	67.33
chr11	14462685	+	-	-	2.694e-24	67.3272
chr19	1650829	+	Promoter	NM_001136139	0.000452752	67.325
chr20	18477886	+	Exon	NM_006606	2.08938e-13	67.3083
chr9	12539397	+	-	-	8.76102e-12	67.2718
chr6	21419803	+	-	-	8.64521e-11	67.2544
chr7	294354	-	Intron	NM_020223	6.46603e-23	67.2535
chr17	1613843	-	Promoter	NM_001164407	1.28085e-33	67.2467
chr14	20929424	+	Promoter	NM_001100814,NM_144568	4.29762e-29	67.245
chr14	20929504	+	Promoter	NM_001100814,NM_144568	4.29762e-29	67.245
chr1	2898814	+	-	-	9.22066e-18	67.2429
chr5	1407736	+	Intron	NM_001044	1.26751e-11	67.233
chr3	11210233	+	Intron	NM_001098213	3.39718e-08	67.2306
chr17	1655645	+	Intron	NM_000934,NM_001165920,NM_001165921	0.00106441	67.2191
chr17	4662178	+	-	-	1.10533e-14	67.2007
chr18	9041006	+	-	-	1.36515e-05	67.1849
chr19	6773074	+	Promoter	NM_001258206,NM_001258207,NM_005428	2.15652e-07	67.1739
chr1	4751393	+	Intron	NM_001042478,NM_018836	5.46292e-05	67.1546
chr6	6952807	-	-	-	2.2615e-15	67.1312
chr1	8741082	-	Intron	NM_012102	7.1131e-05	67.1218
chr3	14852244	+	-	-	1.46648e-07	67.1061
chr3	14852265	+	-	-	1.46648e-07	67.1061
chr3	14852276	+	-	-	1.46648e-07	67.1061
chr3	14852299	+	-	-	1.46648e-07	67.1061
chr3	14852313	+	-	-	1.46648e-07	67.1061
chr3	14852317	+	-	-	1.46648e-07	67.1061
chr3	14852330	+	-	-	1.46648e-07	67.1061
chr3	14852333	+	-	-	1.46648e-07	67.1061
chr3	14852336	+	-	-	1.46648e-07	67.1061
chr3	14852256	+	-	-	1.46648e-07	67.1061
chr19	17497346	-	-	-	7.05259e-06	67.1053
chr1	5793848	-	-	-	5.13917e-05	67.0918
chr11	22365022	+	Intron	NM_020346	1.9885e-08	67.0513
chr11	22365180	+	Intron	NM_020346	1.9885e-08	67.0513
chr17	7975779	+	-	-	5.46051e-05	67.0455
chr14	20929428	+	Promoter	NM_001100814,NM_144568	1.096e-28	67.0218
chr14	20929436	+	Promoter	NM_001100814,NM_144568	1.096e-28	67.0218
chr18	13612078	+	Exon	NM_001003674,NM_001003675	4.71725e-30	67.0192
chr14	20929418	+	Promoter	NM_001100814,NM_144568	1.096e-28	67.017
chr20	18073435	+	-	-	2.12533e-08	66.9947
chr1	9650411	-	Intron	NM_001010866,NM_001130924	2.95664e-15	66.9892
chr3	13461552	+	Promoter	NM_024923	1.16631e-07	66.9508
chr16	4014207	+	Exon	NM_001116	1.96001e-09	66.9444
chr7	1912877	+	Intron	NM_001013836,NM_001013837,NM_003550	0.00128474	66.9385
chr1	10895950	+	-	-	3.19442e-07	66.8911
chr18	12220692	-	-	-	5.21011e-06	66.8675
chr10	13862813	+	Intron	NM_018027	3.59618e-14	66.8609
chr20	18477889	+	Promoter	NM_006606	5.74819e-13	66.8033
chr14	24801071	+	Exon	NM_001198568,NM_001198592,NM_139247	5.15712e-15	66.7813
chr4	779592	-	Exon	NM_006651	9.82456e-13	66.7769
chr20	18477820	+	Exon	NM_006606	6.82927e-13	66.7683
chr4	2561636	+	-	-	2.24186e-09	66.7509
chr19	16446237	+	-	-	1.19518e-16	66.6667
chr11	22365177	+	Intron	NM_020346	4.38129e-08	66.6667
chr4	987719	-	Promoter	NM_022042,NM_134425	1.02366e-05	66.6445
chr16	1536342	+	Exon	NM_001013658	3.57396e-08	66.6382
chr3	13597683	-	Intron	NM_001004019,NM_001998	5.71856e-06	66.6159
chr2	8977714	-	Exon	NM_020738	1.5816e-07	66.6043
chr1	3229781	-	Intron	NM_022114,NM_199454	1.39558e-05	66.5833
chr3	14852236	+	-	-	1.46648e-07	66.5741
chr3	14852240	+	-	-	1.46648e-07	66.5741
chr19	18670950	-	Intron	NM_024069	4.18069e-13	66.5702
chr19	956463	+	Intron	NM_005224	0.000115275	66.5698
chr3	14852263	+	-	-	1.46648e-07	66.5684
chr19	2574198	-	Intron	NM_052847	1.00706e-10	66.5582
chr19	4374680	-	Intron	NM_001199943,NM_001199944,NM_003025	0.000681751	66.5441
chr3	14852311	+	-	-	2.27406e-07	66.5379
chr1	4273932	+	-	-	1.78701e-05	66.5316
chr22	19711801	-	Exon	NM_000407,NR_037611,NR_037612	2.89743e-14	66.5175
chr22	19711825	-	Exon	NM_000407,NR_037611,NR_037612	2.89743e-14	66.5175
chr16	1064728	+	-	-	8.66602e-17	66.5037
chr20	18477891	+	Promoter	NM_006606	5.74819e-13	66.4561
chr18	18794904	+	-	-	3.25279e-10	66.4506
chr5	524263	+	Promoter	NM_004174	8.29472e-17	66.4467
chr1	24164688	+	-	-	4.26059e-24	66.4224
chr19	11375577	-	-	-	3.42977e-14	66.4212
chr18	12775841	+	-	-	3.87909e-12	66.3838
chr1	2075824	+	Intron	NM_001033581,NM_001033582,NM_001242874,NM_002744	2.62095e-06	66.3717
chr4	2419155	-	Intron	NM_001172658	1.2293e-05	66.3703
chr19	1619447	-	Exon	NM_001136139,NM_003200	0.000548194	66.3462
chr13	24821998	-	Intron	NM_153023	1.1835e-13	66.3248
chr20	2188550	-	-	-	6.707e-16	66.3152
chr19	2013336	+	Intron	NM_017797	0.000161609	66.3073
chr5	11181519	+	Intron	NM_001332	1.79239e-05	66.3043
chr22	18429730	+	Intron	NM_001122731,NM_001136004,NM_015241	0.00148241	66.303
chr22	19711902	-	Exon	NM_000407,NR_037611,NR_037612	2.75109e-14	66.2746
chr1	19050391	+	Intron	NM_001135254,NM_002584,NM_013945	8.55054e-05	66.2686
chr10	6317283	+	-	-	1.10671e-12	66.2509
chr19	14110580	+	Intron	NM_002918	1.58067e-11	66.2321
chr5	524248	+	Promoter	NM_004174	3.98744e-17	66.2157
chr6	2765812	-	Exon	NM_020135,NM_130395	1.711e-14	66.2131
chr19	18411033	+	-	-	1.11982e-28	66.2
chr1	10710903	+	Intron	NM_001079843,NM_017766	7.97182e-11	66.1972
chr8	1877889	-	Intron	NM_014629	6.12773e-19	66.1932
chr5	524214	+	Promoter	NM_004174	3.98744e-17	66.1847
chr6	2765725	-	Exon	NM_020135,NM_130395	6.30449e-16	66.1434
chr19	19855520	+	-	-	7.97881e-07	66.129
chr5	524296	+	Promoter	NM_004174	5.19086e-17	66.1096
chr19	9432132	+	-	-	4.00779e-12	66.1089
chr16	3202052	+	-	-	1.13679e-08	66.0948
chr1	3689151	+	Promoter	NM_001163724	1.26486e-16	66.0928
chr14	20929521	+	Promoter	NM_001100814,NM_144568	4.2926e-28	66.0899
chr16	14067479	+	-	-	0.000190207	66.0714
chr19	2424813	-	Intron	NM_182973	5.51809e-05	66.0714
chr5	524326	+	Promoter	NM_004174	2.16897e-16	66.0257
chr5	524338	+	Promoter	NM_004174	2.16897e-16	66.0257
chr12	3297706	+	Intron	NM_006675	2.3373e-13	66.0232
chr5	524227	+	Promoter	NM_004174	3.98744e-17	66.0197
chr5	524333	+	Promoter	NM_004174	3.98744e-17	66.0197
chr7	1277632	-	-	-	2.39535e-18	66.0196
chr4	6231825	-	Intron	NR_037863	0.00396333	66.0195
chr5	524341	+	Promoter	NM_004174	3.98744e-17	66.0166
chr12	2444471	-	Intron	NM_000719,NM_001129827,NM_001129829,NM_001129830,NM_001129831,NM_001129832,NM_001129833,NM_001129834,NM_001129835,NM_001129836,NM_001129837,NM_001129838,NM_001129839,NM_001129840,NM_001129841,NM_001129842,NM_001129843,NM_001129844,NM_001129846,NM_001167623,NM_001167624,NM_001167625,NM_199460	6.77201e-14	66.0089
chr5	1245788	+	Intron	NM_182632	1.04478e-08	66.0019
chr6	215991	-	-	-	1.12908e-05	66
chr1	2066506	+	Intron	NM_002744	3.47938e-08	65.9928
chrX	23353418	-	Promoter	NM_173495	8.91815e-11	65.9831
chr17	4804454	+	Exon	NM_001145536	4.14286e-13	65.9804
chr1	20064095	-	Intron	NM_181719	3.57533e-23	65.9752
chr16	9032298	-	Intron	NM_003470	8.70394e-05	65.9539
chr7	1277704	-	-	-	1.23252e-18	65.93
chr11	1861363	-	Promoter	NM_001145829	5.34084e-05	65.9286
chr7	612710	-	Intron	NM_001164758,NM_001164759,NM_001164760,NM_001164761,NM_001164762,NM_002735	4.23953e-26	65.9066
chr7	1277748	-	-	-	2.39535e-18	65.9063
chr16	5632167	-	-	-	2.36165e-07	65.8856
chr1	17019359	+	Intron	NR_026567	1.67173e-08	65.8839
chr19	5142720	-	Intron	NM_015015	0.000103039	65.8758
chr19	4523890	-	Exon	NM_001013706	3.15192e-11	65.8619
chr8	1150341	-	-	-	6.82352e-14	65.8497
chr17	5165387	+	-	-	2.74717e-07	65.8465
chr22	20278590	-	-	-	1.35294e-11	65.8046
chr22	19711816	-	Exon	NM_000407,NR_037611,NR_037612	1.29618e-12	65.8033
chr2	10498164	+	Intron	NM_134421	2.16656e-05	65.7895
chr19	477827	-	-	-	1.66827e-06	65.7798
chr3	12705490	-	Exon	NM_002880	0.0010613	65.7738
chr11	2480853	+	Intron	NM_000218	3.317e-09	65.7669
chr3	14852341	+	-	-	3.98688e-07	65.766
chr16	22308785	+	Exon	NM_001258033,NM_001258034,NM_001258035,NM_001258036,NM_018119,NR_047581	2.9614e-30	65.7583
chr19	7142908	+	Exon	NM_000208,NM_001079817	2.48293e-20	65.755
chr19	674685	-	-	-	2.89025e-05	65.7239
chr4	5021703	+	Promoter	NM_018659	1.20373e-05	65.7072
chr2	636251	-	-	-	2.47611e-11	65.707
chr7	2572773	-	-	-	1.66501e-05	65.7051
chr5	6462747	-	Intron	NM_001145161	0.000446723	65.7038
chr5	14951251	+	-	-	1.17308e-11	65.7023
chr7	1277723	-	-	-	2.39535e-18	65.6908
chr1	931053	+	-	-	1.48486e-08	65.6778
chr4	2765506	-	-	-	1.22686e-18	65.6634
chr11	6651801	-	Exon	NM_003737	0.000336169	65.6526
chr5	1834042	-	-	-	5.28126e-12	65.6015
chr2	20646698	-	Promoter	NM_004040	1.59153e-24	65.5883
chr19	3108556	+	Intron	NM_002067	2.07022e-16	65.5823
chr20	2779433	-	Exon	NM_001184699,NM_019609	5.9099e-08	65.5727
chr2	10638341	+	-	-	7.658e-05	65.5711
chr19	11033212	-	Exon	NM_199141	9.14823e-10	65.5637
chr4	9530847	+	-	-	6.67328e-05	65.5455
chr4	3599170	+	-	-	3.9127e-07	65.5405
chr16	1663012	+	Promoter	NM_014714	6.18045e-12	65.5222
chr7	1277706	-	-	-	2.45653e-18	65.5144
chr17	4560252	-	-	-	7.62764e-06	65.4968
chr2	10638190	+	-	-	4.91748e-06	65.4745
chr1	22141406	+	Intron	NM_001013693	1.6572e-09	65.4545
chr1	8683244	-	Intron	NM_001042681,NM_012102	1.08123e-11	65.4438
chr7	1569056	+	-	-	4.05516e-06	65.4412
chr15	22526531	-	-	-	1.23916e-08	65.441
chr1	2408833	+	Intron	NM_014638	1.86552e-10	65.434
chr18	3623633	-	Intron	NM_001242763,NM_001242766	1.72029e-06	65.4321
chr13	20875892	-	-	-	3.55266e-12	65.4251
chr20	16651384	-	-	-	1.38942e-11	65.3962
chr19	2893315	-	-	-	2.24328e-22	65.3891
chr11	9644656	+	-	-	2.1361e-14	65.3883
chr5	322421	+	Intron	NM_001242412,NM_020731	2.55346e-11	65.3767
chr1	8375079	-	-	-	0.00172809	65.3646
chr19	11253693	-	-	-	3.9304e-16	65.3558
chr1	1342971	+	Promoter	NM_017971	0.000544503	65.3491
chr1	1342980	+	Promoter	NM_017971	0.000544503	65.3491
chr1	1342991	+	Promoter	NM_017971	0.000544503	65.3491
chr1	1343122	+	Promoter	NM_017971	0.000544503	65.3491
chr1	1343130	+	Promoter	NM_017971	0.000544503	65.3491
chr16	1333563	-	-	-	1.59804e-11	65.3428
chr22	19711908	-	Exon	NM_000407,NR_037611,NR_037612	3.14472e-11	65.333
chr4	1399848	+	-	-	0.000443161	65.3167
chr8	18244466	-	-	-	0.00231666	65.2885
chr19	7601206	-	Promoter	NM_001166114	0.00159057	65.2875
chr5	16740799	+	Intron	NM_012334	6.68779e-16	65.2796
chr4	1399844	+	-	-	0.000443161	65.2771
chr2	20647063	+	Exon	NM_004040	8.38786e-10	65.2685
chr7	612694	-	Intron	NM_001164758,NM_001164759,NM_001164760,NM_001164761,NM_001164762,NM_002735	1.27638e-24	65.2599
chr5	524329	+	Promoter	NM_004174	3.98744e-17	65.2384
chr19	2717800	-	Exon	NM_145173	1.71773e-05	65.2027
chr9	4662448	-	Intron	NM_001039395	3.09845e-22	65.2001
chr19	14089736	-	Intron	NM_002918	8.78129e-20	65.1806
chr7	1461194	+	-	-	5.64371e-09	65.1772
chr20	20110705	-	Intron	NM_001167816,NM_015585	3.35249e-06	65.1515
chr7	4821118	+	Intron	NM_014855	0.000904018	65.1515
chr16	699293	+	Promoter	NM_145294	2.71054e-11	65.1214
chr16	699316	+	Promoter	NM_145294	2.71054e-11	65.1214
chr17	6347469	-	Promoter	NM_001195228,NM_019013	4.82033e-06	65.0989
chr22	22863195	-	Exon	NM_080764	1.83805e-11	65.0873
chr1	10755521	-	Intron	NM_001079843,NM_017766	4.21363e-09	65.0794
chr13	24882400	+	-	-	2.35161e-08	65.0685
chr19	17952198	-	Exon	NM_000215	8.65517e-14	65.0621
chr14	24522686	-	Intron	NM_138360	1.77133e-05	65.0305
chr22	22863160	-	Exon	NM_080764	4.94062e-12	65.008
chr16	19078431	+	Promoter	NM_001190983	0.000316205	65
chr17	1613891	-	Promoter	NM_001164407	1.70722e-34	64.999
chr16	827837	-	-	-	8.3468e-11	64.9849
chr19	18162460	-	-	-	0.000519297	64.9582
chr11	2903089	-	-	-	3.32065e-07	64.95
chr8	21956693	+	Intron	NM_022749	2.55655e-06	64.9028
chr8	20771548	+	-	-	5.14034e-06	64.8958
chr19	1855588	+	Intron	NM_031918	8.15453e-08	64.8941
chr19	18285258	-	Promoter	NM_006332	4.12834e-23	64.844
chr22	19733352	-	-	-	2.15356e-09	64.8299
chr17	9478879	+	Promoter	NM_004853,NR_033656	0.000121568	64.8161
chrX	3858043	+	-	-	1.0606e-05	64.8148
chr17	3819202	+	Intron	NM_002558	0.000673453	64.801
chr22	22863149	-	Exon	NM_080764	4.94115e-12	64.7857
chr22	22863157	-	Exon	NM_080764	4.94115e-12	64.7857
chr22	22863168	-	Exon	NM_080764	4.94115e-12	64.7857
chr17	4125531	+	Intron	NR_047571	3.29153e-07	64.7379
chr17	9478900	+	Promoter	NM_004853,NR_033656	0.000121568	64.7169
chr7	12750808	-	-	-	6.21992e-06	64.7059
chr1	4992682	-	-	-	4.95631e-10	64.698
chr5	504918	+	Intron	NM_004174	1.47076e-05	64.6955
chr6	24936144	+	-	-	1.73871e-13	64.6937
chr4	9508971	-	-	-	1.70682e-13	64.6832
chr8	18975686	-	-	-	1.66646e-08	64.6745
chr22	22863185	-	Exon	NM_080764	5.30521e-12	64.6563
chr22	22863187	-	Exon	NM_080764	5.30521e-12	64.6563
chr3	11048991	-	Intron	NM_003042	0.00462094	64.6552
chr16	917795	-	Intron	NM_022773,NR_033645,NR_033646	9.58699e-08	64.6448
chr19	10406070	-	Exon	NM_003259	1.90218e-05	64.6428
chr1	1343010	+	Promoter	NM_017971	0.000681004	64.6348
chr17	1613881	-	Promoter	NM_001164407	3.47633e-34	64.5773
chr19	2304623	+	Intron	NM_001101391	0.000173965	64.5695
chr16	745974	+	Intron	NM_153350	3.02603e-10	64.5665
chr19	11594605	+	Exon	NM_138783	6.61781e-10	64.5552
chr17	2831788	-	Intron	NM_001100398,NM_015085	0.000532549	64.5379
chr22	21312080	-	-	-	1.46453e-08	64.5357
chr19	1855565	+	Intron	NM_031918	4.3286e-13	64.5078
chr22	22863183	-	Exon	NM_080764	1.00316e-11	64.505
chr11	561714	+	Promoter	NM_001143993	1.11911e-09	64.4985
chr17	1613852	-	Promoter	NM_001164407	5.28165e-34	64.4803
chr14	23804713	-	-	-	0.00260572	64.4672
chr16	699290	+	Promoter	NM_145294	8.15381e-11	64.4547
chr16	699301	+	Promoter	NM_145294	8.15381e-11	64.4547
chr19	7716728	+	-	-	0.000491671	64.4219
chr19	3452489	-	-	-	2.27317e-15	64.4088
chr1	16812017	-	-	-	0.000817214	64.3939
chr17	1613940	-	Promoter	NM_001164407	1.11516e-32	64.3629
chr17	9478745	+	Promoter	NM_004853,NR_033656	0.000121568	64.3574
chr1	3607098	-	Promoter	NM_001126240,NM_001126241,NM_001126242,NM_001204189,NM_001204190,NM_001204191	8.40762e-19	64.3445
chr16	699304	+	Promoter	NM_145294	8.15381e-11	64.3333
chr16	1232345	+	Intron	NM_001005407,NM_021098	3.51888e-10	64.2804
chr1	2464358	-	-	-	2.88399e-14	64.2548
chr11	2858653	-	Intron	NM_000218,NR_040711	0.0032794	64.2519
chr11	2929473	-	Exon	NM_002555,NM_183233	3.38987e-06	64.2473
chr17	6347467	-	Promoter	NM_001195228,NM_019013	4.82033e-06	64.2292
chr5	218077	+	Promoter	NM_004168	5.79992e-12	64.1933
chr19	18873231	-	Intron	NM_001098482,NM_015321	6.45767e-16	64.1785
chr19	2926572	-	-	-	0.000324277	64.1667
chr22	17938422	-	-	-	3.55364e-11	64.1384
chr3	11817787	+	-	-	2.57392e-06	64.1124
chr3	8810875	-	Promoter	NM_000916	7.0666e-06	64.1104
chr4	9497974	-	-	-	2.61293e-13	64.1024
chr19	22892261	-	-	-	1.61613e-12	64.0944
chr19	12666536	+	-	-	1.08296e-17	64.0676
chr1	8292579	-	-	-	3.61275e-05	64.0614
chr1	3321983	-	Intron	NM_022114,NM_199454	0.000317927	64.0543
chr16	809477	-	-	-	8.88624e-16	64.0514
chr19	731820	+	Intron	NM_001040134,NM_002579	9.8473e-10	64.0467
chr20	415541	-	-	-	1.09689e-08	64.0185
chr17	3831315	-	Intron	NM_174957	4.64069e-09	63.9677
chr4	6564597	-	Promoter	NM_001206994	0.000367371	63.9582
chr19	22892193	-	-	-	1.61613e-12	63.9429
chr7	449454	+	-	-	0.000378686	63.9258
chr17	933425	-	Intron	NM_001256847	4.64868e-08	63.9243
chr11	727915	-	-	-	4.35472e-12	63.89
chr11	7921510	-	Intron	NR_036678	4.61152e-31	63.8852
chr19	17952209	-	Exon	NM_000215	1.15495e-13	63.8766
chr11	891234	-	Intron	NM_001142677	2.90037e-08	63.8664
chr5	13579671	-	-	-	3.27248e-07	63.8603
chr16	19078439	+	Promoter	NM_001190983	3.99355e-06	63.8492
chr17	2756713	+	Intron	NM_001100398,NM_015085	2.60608e-06	63.8213
chr19	19649166	+	Exon	NM_153221	2.93571e-16	63.8079
chr20	6750783	-	Exon	NM_001200	1.43927e-12	63.8047
chr3	14326409	-	-	-	3.19146e-10	63.7953
chr16	699279	+	Promoter	NM_145294	2.71054e-11	63.7859
chr1	3229766	-	Intron	NM_022114,NM_199454	1.39568e-05	63.7833
chr2	928959	-	-	-	1.03985e-15	63.7787
chr10	3108363	-	-	-	1.22449e-14	63.7778
chr1	1342989	+	Promoter	NM_017971	0.000855656	63.7646
chr17	10009626	-	Intron	NM_201433	6.04813e-13	63.7546
chr11	851048	+	Intron	NM_001025239	6.03188e-05	63.7301
chr16	2891346	-	Exon	NR_026864	7.49179e-06	63.7255
chr16	790744	+	Promoter	NM_022493	1.7999e-22	63.7227
chr11	10315802	-	Promoter	NM_030962	1.99357e-08	63.7193
chr1	9904407	-	-	-	2.91112e-06	63.7152
chr19	5977796	-	Promoter	NM_003624,NM_007320,NM_007322	4.35245e-06	63.7137
chr1	9903073	+	-	-	5.86887e-09	63.6986
chr17	8534456	-	Promoter	NM_001256012,NM_001256095,NM_005964	3.54642e-27	63.6872
chr1	3519083	+	Exon	NM_001409	2.51332e-07	63.6792
chr1	1023976	+	Intron	NM_017891	0.000276853	63.6723
chr11	1081954	+	Intron	NM_002457	2.06013e-10	63.6655
chr11	11796480	-	-	-	1.56589e-17	63.6646
chr4	3656949	-	-	-	1.58487e-10	63.6507
chr16	699451	+	Promoter	NM_145294	2.71054e-11	63.6364
chr3	6532419	+	-	-	1.40216e-05	63.6326
chr8	1951088	-	Exon	NM_014867	2.16248e-08	63.6228
chr19	12936623	+	Exon	NM_001080997,NM_001270441,NM_001270442,NM_001270443,NM_001270444,NM_001270445,NM_031429	0.000160333	63.6194
chr19	12936638	+	Exon	NM_001080997,NM_001270441,NM_001270442,NM_001270443,NM_001270444,NM_001270445,NM_031429	0.000160333	63.6194
chr19	12936646	+	Exon	NM_001080997,NM_001270441,NM_001270442,NM_001270443,NM_001270444,NM_001270445,NM_031429	0.000160333	63.6194
chr19	12936648	+	Exon	NM_001080997,NM_001270441,NM_001270442,NM_001270443,NM_001270444,NM_001270445,NM_031429	0.000160333	63.6194
chr19	12936674	+	Exon	NM_001080997,NM_001270441,NM_001270442,NM_001270443,NM_001270444,NM_001270445,NM_031429	0.000160333	63.6194
chr14	24801064	+	Exon	NM_001198568,NM_001198592,NM_139247	1.84581e-26	63.6108
chr17	8534549	-	Promoter	NM_001256012,NM_001256095,NM_005964	1.28122e-27	63.5952
chr19	12995924	+	Intron	NM_006563	1.61754e-11	63.5778
chr22	19891230	-	Intron	NM_006440	6.63177e-05	63.5714
chr18	18823268	+	Intron	NM_001142966	4.24535e-26	63.5379
chr17	9478719	+	Promoter	NM_004853,NR_033656	0.000121568	63.5047
chr19	14642327	+	Intron	NM_138501,NR_038103,NR_038104	1.98904e-11	63.5044
chr11	2036949	+	-	-	7.24394e-06	63.4929
chr19	12753684	-	-	-	0.000249853	63.4864
chr7	2757082	-	-	-	0.000696388	63.4843
chr16	790707	+	Promoter	NM_022493	8.42722e-23	63.4792
chr17	8534577	-	Promoter	NM_001256012,NM_001256095,NM_005964	3.54642e-27	63.4686
chr17	8534449	-	Promoter	NM_001256012,NM_001256095,NM_005964	3.54642e-27	63.4555
chr17	8534494	-	Promoter	NM_001256012,NM_001256095,NM_005964	9.89059e-27	63.4117
chr1	3634989	-	Intron	NM_001126240,NM_001126241,NM_001126242,NM_001204184,NM_001204185,NM_001204186,NM_001204187,NM_001204188,NM_001204189,NM_001204190,NM_001204191,NM_001204192,NM_005427	1.09913e-29	63.4075
chr19	3512038	-	Intron	NM_016263	3.62431e-08	63.3967
chr16	790766	+	Promoter	NM_022493	1.82393e-22	63.3929
chr17	7253858	-	Intron	NM_014716	3.92793e-07	63.3925
chr20	18477930	+	Promoter	NM_006606	4.27606e-10	63.3887
chr4	7632386	+	Intron	NM_020777	8.53611e-11	63.3803
chr15	22373731	+	-	-	3.83799e-05	63.3803
chr4	995695	+	Intron	NM_000203	5.0312e-08	63.377
chr19	12936620	+	Exon	NM_001080997,NM_001270441,NM_001270442,NM_001270443,NM_001270444,NM_001270445,NM_031429	0.000160333	63.3576
chr19	2125723	+	Intron	NM_001261826,NM_003938	8.61106e-05	63.354
chr19	2596123	-	Intron	NM_052847	3.27231e-05	63.349
chr1	1097270	+	-	-	1.25156e-17	63.3375
chr17	8534558	-	Promoter	NM_001256012,NM_001256095,NM_005964	9.60424e-27	63.334
chr19	9811111	+	Exon	NM_001199814	4.23921e-07	63.3333
chr16	10973522	-	Intron	NM_000246	6.80408e-11	63.3327
chr7	2757261	-	-	-	0.000696388	63.3326
chr16	4527425	-	Intron	NM_002134	3.40577e-06	63.3314
chr12	6485590	-	Promoter	NM_001038	3.17257e-13	63.3304
chr11	6479361	+	-	-	2.29448e-11	63.327
chr19	15330882	-	-	-	0.00196932	63.3036
chr9	22863294	+	-	-	3.55112e-07	63.3035
chr11	10315812	-	Promoter	NM_030962	2.92499e-08	63.3004
chr11	10315814	-	Promoter	NM_030962	2.92499e-08	63.3004
chr8	9413989	+	Exon	NM_003747	1.81125e-32	63.2888
chr17	8534480	-	Promoter	NM_001256012,NM_001256095,NM_005964	3.54642e-27	63.2807
chr17	8534573	-	Promoter	NM_001256012,NM_001256095,NM_005964	3.54642e-27	63.2807
chr20	13515750	+	-	-	3.39581e-10	63.2678
chr12	14925392	+	-	-	4.40927e-06	63.2653
chr17	8534530	-	Promoter	NM_001256012,NM_001256095,NM_005964	9.89059e-27	63.2583
chr17	8534478	-	Promoter	NM_001256012,NM_001256095,NM_005964	4.52678e-27	63.2329
chr16	23568699	+	Promoter	NM_001083614,NR_003501	4.67435e-08	63.205
chr10	19284847	-	-	-	3.15052e-05	63.1868
chr8	21989376	-	Promoter	NM_005144,NM_018411	7.46632e-13	63.1861
chr19	19754410	-	Exon	NM_016573	0.000485301	63.18
chr2	636271	-	-	-	7.86255e-11	63.1663
chr19	3114229	-	Intron	NM_002067	0.0003749	63.1602
chr7	2183968	+	Intron	NM_001013836,NM_001013837,NM_003550	1.05145e-09	63.1584
chr2	2737255	+	-	-	1.25616e-06	63.1532
chr11	2871735	-	-	-	0.000681737	63.153
chr1	19110700	-	-	-	2.06234e-11	63.1386
chr8	1137662	-	-	-	2.95247e-17	63.1304
chr5	1878210	-	Exon	NM_016358	5.96486e-08	63.1228
chr17	8534473	-	Promoter	NM_001256012,NM_001256095,NM_005964	3.54642e-27	63.1047
chr8	22034067	-	-	-	0.00103665	63.1042
chr5	6855457	+	-	-	8.4634e-06	63.0887
chr19	18529340	-	Promoter	NM_001009998,NM_032627	0.000102961	63.0837
chr17	8534538	-	Promoter	NM_001256012,NM_001256095,NM_005964	9.60424e-27	63.0623
chr16	790692	+	Promoter	NM_022493	2.01976e-22	63.0542
chr16	12002339	+	Intron	NM_001130007	0.000285082	63.047
chr1	19110735	-	-	-	2.06234e-11	63.043
chr19	1511883	+	Intron	NM_213604	1.87819e-10	63.0195
chr16	22308867	+	Promoter	NM_001258033,NM_001258034,NM_001258035,NM_001258036,NM_018119,NR_047581	3.04506e-21	63.0175
chr12	14923067	+	Promoter	NM_175054	3.31657e-07	62.999
chr2	10333569	-	Promoter	NR_036222	0.00087751	62.9928
chr19	13321828	+	-	-	0.000617396	62.9902
chr4	8767601	+	-	-	2.60466e-19	62.9689
chr2	10221801	-	-	-	0.00106718	62.963
chr2	9144107	+	Promoter	NM_138799	1.04116e-06	62.9313
chr22	24891064	-	Promoter	NM_016327	0.000106064	62.9289
chr4	1206338	+	Intron	NM_001012614,NM_001328	4.02581e-18	62.9205
chr11	10315822	-	Promoter	NM_030962	5.76633e-08	62.9187
chr4	3425388	+	-	-	1.34166e-21	62.915
chr8	6456151	+	Intron	NM_024596	0.000401689	62.9091
chr8	6456182	+	Intron	NM_024596	0.000401689	62.9091
chr16	22308811	+	Exon	NM_001258033,NM_001258034,NM_001258035,NM_001258036,NM_018119,NR_047581	8.35451e-21	62.9065
chr10	13933823	+	Intron	NM_018027	3.34075e-10	62.9048
chr17	8534451	-	Promoter	NM_001256012,NM_001256095,NM_005964	3.54642e-27	62.8917
chr16	22308830	+	Exon	NM_001258033,NM_001258034,NM_001258035,NM_001258036,NM_018119,NR_047581	1.85187e-20	62.8829
chr19	12936614	+	Exon	NM_001080997,NM_001270441,NM_001270442,NM_001270443,NM_001270444,NM_001270445,NM_031429	0.00177005	62.8731
chr7	2170479	+	Intron	NM_001013836,NM_001013837,NM_003550	9.71612e-05	62.8718
chr12	8145611	-	-	-	1.02713e-07	62.8571
chr16	1333610	-	-	-	2.23139e-08	62.8537
chr11	10315791	-	Promoter	NM_030962	8.60809e-08	62.8433
chr19	1569206	-	-	-	3.08832e-09	62.8356
chr16	22308833	+	Exon	NM_001258033,NM_001258034,NM_001258035,NM_001258036,NM_018119,NR_047581	3.37294e-20	62.8325
chr17	8534552	-	Promoter	NM_001256012,NM_001256095,NM_005964	3.54642e-27	62.8084
chr17	8534569	-	Promoter	NM_001256012,NM_001256095,NM_005964	9.60424e-27	62.7914
chr22	22863151	-	Exon	NM_080764	4.98702e-12	62.7857
chr19	10541434	+	Promoter	NM_001111308	1.23936e-10	62.7801
chr1	10772826	+	Intron	NM_001079843,NM_017766	2.15806e-05	62.7718
chr5	1114753	-	-	-	7.15271e-14	62.7711
chr4	13712406	-	-	-	0.00312461	62.7639
chr2	23703213	+	Intron	NM_052920	3.46064e-09	62.7252
chr11	2398225	-	Promoter	NM_004356	2.86308e-07	62.724
chr7	22590088	+	-	-	1.04567e-10	62.7152
chr1	9116952	-	Intron	NM_001135585,NM_003039	8.80141e-09	62.6979
chr16	9250894	-	-	-	0.00189143	62.6949
chr16	22308882	+	Promoter	NM_001258033,NM_001258034,NM_001258035,NM_001258036,NM_018119,NR_047581	6.33917e-21	62.6941
chr10	24672419	+	Intron	NM_001098500,NM_001098501,NM_019590	6.31339e-05	62.6813
chr16	22308793	+	Exon	NM_001258033,NM_001258034,NM_001258035,NM_001258036,NM_018119,NR_047581	6.33917e-21	62.6656
chr18	14997480	-	-	-	8.64387e-06	62.6623
chr1	3011608	-	Intron	NM_022114,NM_199454	9.31504e-07	62.6555
chr1	1027729	+	Intron	NM_017891	5.09365e-06	62.6452
chr16	22308824	+	Exon	NM_001258033,NM_001258034,NM_001258035,NM_001258036,NM_018119,NR_047581	8.35451e-21	62.6444
chr1	5575485	+	-	-	4.03022e-12	62.6347
chr7	1426955	-	-	-	0.000766491	62.634
chr19	8575738	+	Exon	NM_001146175	1.90603e-08	62.6221
chr10	24672433	+	Intron	NM_001098500,NM_001098501,NM_019590	6.31339e-05	62.6207
chr7	813677	-	Intron	NM_017802	0.00223801	62.6051
chr16	2059540	-	Exon	NM_178167	5.55921e-18	62.6007
chr1	6640293	-	Promoter	NM_005341	0.000183987	62.585
chr6	9025694	-	-	-	1.2297e-05	62.5811
chr7	949148	+	Intron	NM_006869	2.45433e-08	62.5786
chr1	10766045	-	Intron	NM_001079843,NM_017766	9.71786e-18	62.5739
chr16	790768	+	Promoter	NM_022493	5.91226e-21	62.5732
chr16	790772	+	Promoter	NM_022493	5.91226e-21	62.5732
chr12	6831730	-	-	-	1.32653e-09	62.5662
chr7	22590117	+	-	-	3.29124e-10	62.5643
chr7	5428393	-	Exon	NM_001080495	6.39708e-10	62.5631
chr5	12322	+	-	-	1.2118e-06	62.5509
chr19	3770736	-	Exon	NM_032753	5.64803e-15	62.5298
chr4	995686	+	Intron	NM_000203	2.42123e-07	62.5295
chr19	17873787	+	Intron	NM_001161357,NM_001161358,NM_001161359,NM_015122	1.96022e-10	62.5253
chr12	7068291	-	Intron	NM_002831,NM_080548,NM_080549	5.39616e-13	62.517
chr16	15225262	+	-	-	1.19198e-05	62.5169
chr1	20045660	-	Intron	NM_181719	2.056e-10	62.4519
chr8	6385715	-	Intron	NM_024596	1.45197e-07	62.4391
chr19	2291229	-	Exon	NM_001101391	4.26895e-09	62.4339
chr21	11043338	-	Intron	NM_181704,NM_182481,NM_182482,NM_182484	1.52071e-08	62.3852
chr11	2884453	-	-	-	1.23472e-08	62.3764
chr16	22308796	+	Exon	NM_001258033,NM_001258034,NM_001258035,NM_001258036,NM_018119,NR_047581	6.33917e-21	62.3749
chr16	790704	+	Promoter	NM_022493	8.02151e-22	62.3647
chr19	10541503	+	Promoter	NM_001111308	1.52933e-08	62.3624
chr22	24815003	-	-	-	1.17592e-10	62.3623
chr5	962786	+	-	-	0.00146809	62.3603
chr16	22308852	+	Exon	NM_001258033,NM_001258034,NM_001258035,NM_001258036,NM_018119,NR_047581	7.19864e-20	62.3447
chr16	2059560	-	Exon	NM_178167	2.697e-17	62.3366
chr11	10315733	-	Exon	NM_030962	4.57122e-07	62.3334
chr16	790670	+	Promoter	NM_022493	6.02475e-21	62.3214
chr8	9414031	+	Exon	NM_003747	1.03018e-33	62.3137
chr16	615958	+	-	-	0.00200108	62.3131
chr7	2757239	-	-	-	0.00241185	62.3027
chr7	1274971	+	Intron	NM_001080461	0.000154185	62.2978
chr19	2291296	-	Exon	NM_001101391	4.88977e-09	62.2928
chr16	1965370	-	Intron	NM_001009606	2.1463e-07	62.2664
chr5	36644	-	-	-	8.34047e-14	62.2646
chr19	14379229	+	-	-	0.000117037	62.2605
chr20	18477914	+	Promoter	NM_006606	1.0869e-07	62.2323
chr16	2059607	-	Exon	NM_178167	9.78803e-17	62.21
chr8	9413999	+	Exon	NM_003747	2.18623e-33	62.1678
chr20	14450981	+	Intron	NM_080676	2.47635e-09	62.1636
chr19	10541552	+	Exon	NM_001111308	1.99694e-10	62.1474
chr5	1445150	+	Promoter	NM_001044	2.13495e-07	62.1327
chr1	3103127	-	Intron	NM_022114,NM_199454	3.80917e-08	62.1051
chr10	2964799	+	-	-	8.09464e-07	62.1005
chr17	8534446	-	Promoter	NM_001256012,NM_001256095,NM_005964	2.57102e-25	62.093
chr7	22590075	+	-	-	3.29124e-10	62.0856
chr7	22590083	+	-	-	3.29124e-10	62.0856
chr7	22590219	+	-	-	3.29124e-10	62.0856
chr11	841601	+	Promoter	NM_021128	2.34248e-22	62.0845
chr1	3003322	+	Intron	NM_022114,NM_199454	3.25794e-05	62.0679
chr1	16506800	+	-	-	1.31237e-09	62.0357
chr16	2059549	-	Exon	NM_178167	2.697e-17	62.0269
chr16	2059578	-	Exon	NM_178167	2.697e-17	62.0269
chr16	2059516	-	Promoter	NM_178167	2.697e-17	62.0269
chr16	2059521	-	Promoter	NM_178167	2.697e-17	62.0269
chr16	2059530	-	Exon	NM_178167	7.86383e-17	62.0269
chr19	19013887	-	Intron	NM_199444	2.11384e-05	62.0014
chr11	10315727	-	Exon	NM_030962	8.75696e-07	61.9955
chr16	2059567	-	Exon	NM_178167	2.697e-17	61.969
chr16	22308809	+	Exon	NM_001258033,NM_001258034,NM_001258035,NM_001258036,NM_018119,NR_047581	7.71062e-20	61.9587
chr12	7037924	-	Promoter	NM_001940	3.07458e-05	61.937
chr19	12799868	-	Exon	NM_032301	2.44911e-10	61.9174
chr17	2303701	-	Promoter	NM_020310	8.63919e-29	61.9172
chr19	2291302	-	Exon	NM_001101391	9.95686e-09	61.9084
chr12	7038003	-	Promoter	NM_001940	3.07458e-05	61.904
chr19	5017048	+	Intron	NM_015015	3.75546e-07	61.9014
chr19	2291272	-	Exon	NM_001101391	9.89671e-09	61.8974
chr19	2291277	-	Exon	NM_001101391	9.89675e-09	61.8974
chr8	1004029	+	Intron	NR_073397,NR_073466	3.48488e-08	61.8958
chrX	9116311	-	-	-	4.00751e-17	61.8781
chr11	10315685	-	Exon	NM_030962	1.62649e-06	61.8736
chr16	2059542	-	Exon	NM_178167	2.697e-17	61.8579
chr19	11350362	+	Promoter	NM_018687	5.62254e-19	61.8449
chr1	22655775	-	-	-	0.00124312	61.8445
chr19	11255392	-	-	-	1.17979e-11	61.836
chr19	2291216	-	Exon	NM_001101391	1.0586e-08	61.8341
chr1	1109653	-	Promoter	NM_001130045	1.45991e-07	61.8282
chr1	23695809	+	Exon	NR_033690	6.43733e-06	61.8278
chr19	10541527	+	Exon	NM_001111308	2.58779e-10	61.8163
chr19	10541531	+	Exon	NM_001111308	2.58779e-10	61.8163
chr19	10541448	+	Promoter	NM_001111308	2.58779e-10	61.8163
chr19	10541455	+	Promoter	NM_001111308	2.58779e-10	61.8163
chr19	10541466	+	Promoter	NM_001111308	2.58779e-10	61.8163
chr19	10541475	+	Promoter	NM_001111308	2.58779e-10	61.8163
chr19	10541478	+	Promoter	NM_001111308	2.58779e-10	61.8163
chr19	10541514	+	Promoter	NM_001111308	2.58779e-10	61.8163
chr2	3457010	-	Intron	NM_016030	2.72923e-07	61.8128
chr1	19110741	-	-	-	2.06234e-11	61.8085
chr7	2121249	-	Intron	NM_001013836,NM_001013837,NM_003550	7.6531e-34	61.7963
chr12	7037920	-	Promoter	NM_001940	9.82304e-06	61.7912
chr16	11620925	-	-	-	7.95111e-14	61.7889
chr19	2291284	-	Exon	NM_001101391	1.65307e-08	61.7725
chr11	14912374	-	Intron	NM_024514	2.0245e-06	61.7514
chr12	7037954	-	Promoter	NM_001940	3.07458e-05	61.7393
chr19	1855655	+	Intron	NM_031918	4.24614e-07	61.7391
chr7	5632424	+	Promoter	NM_003088	1.42983e-27	61.7352
chr16	22308850	+	Exon	NM_001258033,NM_001258034,NM_001258035,NM_001258036,NM_018119,NR_047581	1.30111e-18	61.7261
chr22	22863162	-	Exon	NM_080764	1.18242e-11	61.7131
chr19	9546934	+	Promoter	NM_001271314,NM_006631	1.63251e-08	61.7063
chr16	2059596	-	Exon	NM_178167	6.08023e-16	61.705
chr16	11648500	+	-	-	1.30858e-12	61.7026
chr19	10541509	+	Promoter	NM_001111308	3.15983e-10	61.69
chr11	280845	-	Exon	NM_138329	8.56529e-06	61.6667
chr5	1231971	+	Intron	NM_182632	0.000533975	61.6667
chr16	22308790	+	Exon	NM_001258033,NM_001258034,NM_001258035,NM_001258036,NM_018119,NR_047581	3.37294e-20	61.6613
chr16	2059552	-	Exon	NM_178167	2.697e-17	61.6606
chr18	335078	+	Exon	NM_130386	1.34326e-06	61.6481
chrX	21866393	+	Intron	NM_015884	1.30392e-07	61.6343
chr1	22499049	+	-	-	1.55216e-08	61.6232
chr11	14666190	+	Exon	NM_000922	4.69083e-10	61.6111
chr2	3132707	+	-	-	2.82775e-07	61.6011
chr17	7296721	+	Intron	NM_001201576,NM_020360,NR_037719	1.8683e-09	61.598
chr11	10315712	-	Exon	NM_030962	1.62649e-06	61.573
chr11	10315721	-	Exon	NM_030962	1.62649e-06	61.5624
chr9	15422914	-	Promoter	NM_001039697	7.07502e-13	61.5603
chr19	3240924	+	Intron	NR_033342	5.43376e-05	61.5602
chr10	13933711	+	Intron	NM_018027	3.54354e-10	61.5556
chr10	13933742	+	Intron	NM_018027	3.54354e-10	61.5556
chr10	13933746	+	Intron	NM_018027	3.54354e-10	61.5556
chr10	13933846	+	Intron	NM_018027	3.54354e-10	61.5556
chr10	13933707	+	Intron	NM_018027	3.54366e-10	61.5556
chr10	13933755	+	Intron	NM_018027	3.94376e-10	61.5556
chr10	13933802	+	Intron	NM_018027	3.94381e-10	61.5556
chr7	8473528	-	Promoter	NM_152745	1.88463e-12	61.5115
chr1	3349983	-	Intron	NM_199454	8.33415e-06	61.5056
chr11	753120	-	Intron	NM_006755	0.00055051	61.5047
chr7	2757087	-	-	-	4.19122e-05	61.4931
chr19	16697687	-	Intron	NM_004831	5.73301e-05	61.4641
chr13	21476798	-	Promoter	NM_022459	0.00215648	61.4452
chr7	1275038	+	Intron	NM_001080461	0.000209854	61.435
chr7	1275046	+	Intron	NM_001080461	0.000209854	61.435
chr1	1474805	-	Promoter	NM_001114748	6.82587e-05	61.4273
chr11	9284584	-	Intron	NM_001243254,NM_015213	0.000178861	61.4217
chr19	1333806	+	-	-	6.37218e-08	61.4083
chr6	7061853	-	-	-	8.90869e-13	61.3925
chr19	18543950	-	Exon	NM_001009998,NM_032627	1.93567e-12	61.3915
chr17	7975775	+	-	-	0.0028533	61.3636
chr16	624857	-	Intron	NM_004204,NM_148920	1.92724e-05	61.3585
chr19	10541525	+	Exon	NM_001111308	3.5629e-10	61.3533
chr12	323186	+	Promoter	NM_001122847	3.93398e-12	61.3455
chr7	1275024	+	Intron	NM_001080461	0.000223872	61.3334
chr19	18210492	-	Intron	NM_015016	4.14456e-06	61.3332
chr17	8191821	-	Exon	NM_201520	1.63951e-07	61.3031
chr17	8191871	-	Exon	NM_201520	1.63951e-07	61.3031
chr4	2009808	-	Intron	NM_005663	0.00206477	61.2732
chr16	4834178	+	Intron	NM_144605	0.00249618	61.2547
chr10	14851297	+	-	-	0.000396698	61.2261
chr11	1358638	+	-	-	8.30436e-21	61.2115
chr16	2059513	-	Promoter	NM_178167	6.08023e-16	61.1697
chr10	6131099	-	Exon	NM_032905	9.67679e-16	61.1679
chr1	16974255	+	Intron	NR_027504	7.54739e-17	61.1556
chr1	18434731	+	Promoter	NM_032880	5.60861e-21	61.1503
chr7	5632401	+	Promoter	NM_003088	4.72637e-19	61.1467
chr6	736122	-	-	-	4.45668e-12	61.1459
chr11	809616	+	Promoter	NM_001004	9.91458e-11	61.1393
chr4	8880425	+	-	-	7.10431e-15	61.1387
chr10	12770012	-	Intron	NM_020397,NM_153498	1.01355e-07	61.1358
chr10	6131056	-	Exon	NM_032905	5.62263e-16	61.1328
chr11	10315837	-	Promoter	NM_030962	4.14087e-07	61.1166
chr6	2928377	+	-	-	0.000130228	61.0901
chr9	15422907	-	Promoter	NM_001039697	7.07502e-13	61.0841
chr5	1230781	+	Intron	NM_182632	2.07835e-15	61.0837
chr7	1274926	+	Intron	NM_001080461	0.000374587	61.0753
chr21	10137644	+	-	-	2.5493e-09	61.0749
chr17	8191866	-	Exon	NM_201520	2.9395e-07	61.0592
chr17	7253738	-	Intron	NM_014716	9.80289e-08	61.0367
chr5	16179436	+	Exon	NM_001102562	5.31407e-09	61.024
chr5	16179535	+	Exon	NM_001102562	5.31407e-09	61.024
chr11	10830012	-	Promoter	NM_001042559,NM_001418	2.04568e-10	61.0109
chr8	21966402	+	Promoter	NM_024815	1.29832e-10	61.0078
chr7	941614	-	Intron	NM_006869	3.08996e-11	60.9798
chr17	20817735	+	-	-	0.00307783	60.9785
chr22	22090696	-	Promoter	NM_013313	2.32849e-06	60.9711
chr22	22090715	-	Promoter	NM_013313	2.32849e-06	60.9711
chr22	22090719	-	Promoter	NM_013313	2.32849e-06	60.9711
chr22	22090729	-	Promoter	NM_013313	2.32849e-06	60.9711
chr2	928972	-	-	-	2.92815e-14	60.9656
chr11	11419428	+	Intron	NM_198516	0.000157364	60.9621
chr10	13933830	+	Intron	NM_018027	3.41399e-09	60.9603
chr10	13933832	+	Intron	NM_018027	3.41399e-09	60.9603
chr4	1535725	-	-	-	1.92777e-05	60.9585
chr10	13933799	+	Intron	NM_018027	3.79836e-09	60.9531
chr19	1453850	+	Intron	NM_005883	1.5353e-07	60.9444
chr10	13933733	+	Intron	NM_018027	4.71715e-09	60.9383
chr6	16239031	+	Promoter	NM_006877	0.000120091	60.9249
chr19	8233843	+	-	-	3.65538e-22	60.9236
chr1	21907853	-	-	-	8.72455e-05	60.9217
chrX	18333068	+	Intron	NM_006089,NR_033717	0.00252743	60.9173
chr17	7975693	+	-	-	0.0028533	60.9146
chr22	22712680	+	-	-	3.02303e-06	60.9057
chr10	6131017	-	Exon	NM_032905	9.67679e-16	60.8983
chr10	6131019	-	Exon	NM_032905	9.67679e-16	60.8983
chr10	6131022	-	Exon	NM_032905	9.67679e-16	60.8983
chr10	6131075	-	Exon	NM_032905	9.67679e-16	60.8983
chr10	6131089	-	Exon	NM_032905	9.67679e-16	60.8983
chr16	3931230	-	-	-	2.85898e-06	60.8819
chr11	299545	+	Promoter	NM_001025295	2.39332e-12	60.8796
chr17	7253809	-	Intron	NM_014716	9.80289e-08	60.8591
chr20	1293823	-	Promoter	NM_015685	0.00185063	60.8551
chr10	6131029	-	Exon	NM_032905	3.7339e-16	60.8518
chr5	2181210	-	-	-	1.51753e-10	60.8492
chr4	1028254	-	-	-	1.26392e-11	60.8346
chr7	1274959	+	Intron	NM_001080461	0.000176892	60.8332
chr1	16862110	+	-	-	0.00482524	60.8183
chr7	5156347	+	-	-	0.00014866	60.8134
chr10	6131081	-	Exon	NM_032905	3.28714e-15	60.8119
chr8	9414020	+	Exon	NM_003747	1.6869e-34	60.8037
chr10	6131059	-	Exon	NM_032905	9.67679e-16	60.7975
chr10	6131062	-	Exon	NM_032905	9.67679e-16	60.7975
chr5	1091910	-	Intron	NM_006598	9.78857e-11	60.7883
chr1	23049897	-	Intron	NM_004442,NM_017449	1.9695e-11	60.7815
chr7	1925395	+	Intron	NM_001013836,NM_001013837,NM_003550	6.02852e-10	60.78
chr1	21672170	+	Promoter	NM_001113348	1.42127e-06	60.7552
chr6	736825	+	-	-	3.60197e-08	60.7537
chr17	8191894	-	Exon	NM_201520	1.63951e-07	60.7413
chr4	786055	-	Intron	NM_006651	6.13575e-05	60.7348
chr20	3052818	-	Promoter	NM_000915	3.23715e-06	60.7334
chr5	16179562	+	Exon	NM_001102562	1.42354e-08	60.7243
chr10	13933817	+	Intron	NM_018027	3.54639e-10	60.7222
chr10	13933835	+	Intron	NM_018027	3.54639e-10	60.7222
chr19	3809041	-	Intron	NM_015174	0.00236185	60.72
chr7	1708929	-	-	-	2.51352e-09	60.714
chr20	3052823	-	Promoter	NM_000915	3.434e-06	60.7094
chr22	19138406	+	Promoter	NM_005315	2.09252e-19	60.7079
chr22	19138323	+	Promoter	NM_005315	2.09252e-19	60.7079
chr4	8052352	-	Intron	NM_001130083,NM_001130084,NM_001130085,NM_001130086,NM_001130087,NM_001130088,NM_032432	2.37771e-14	60.6905
chr8	22021845	+	Exon	NM_001172357	7.80984e-20	60.6831
chr11	809717	+	Promoter	NM_001004	8.447e-11	60.6785
chr11	809724	+	Promoter	NM_001004	8.447e-11	60.6785
chr5	16179547	+	Exon	NM_001102562	9.87747e-09	60.6766
chr12	5122959	-	-	-	1.08651e-09	60.6599
chr19	19271508	-	Intron	NM_005919,NR_027307,NR_027308	8.53326e-05	60.6514
chr15	22847512	+	Intron	NM_001102610,NM_052903	2.21035e-06	60.6479
chr12	1905699	-	Intron	NM_172364	2.02515e-14	60.6225
chr16	917823	-	Intron	NM_022773,NR_033645,NR_033646	4.0195e-06	60.6043
chr4	8857273	+	-	-	1.46492e-17	60.597
chr17	8191892	-	Exon	NM_201520	2.99821e-07	60.5843
chr20	3052864	-	Promoter	NM_000915	4.15543e-07	60.5802
chr14	23437933	+	-	-	0.00126913	60.579
chr5	20640372	+	-	-	1.04965e-05	60.5738
chr3	10207575	+	Intron	NM_001570	3.54332e-09	60.5661
chr20	3052741	-	Promoter	NM_000915	1.26177e-06	60.5622
chr4	2419093	-	Intron	NM_001172658	0.000261025	60.5563
chr2	16080305	+	Exon	NR_026766	3.06574e-06	60.533
chr2	16080377	+	Exon	NR_026766	3.06574e-06	60.533
chr2	16080403	+	Exon	NR_026766	3.06574e-06	60.533
chr19	18979729	+	Exon	NM_001492,NM_021267	1.13585e-08	60.5315
chr11	279727	-	Intron	NM_138329	7.2264e-09	60.5176
chr19	2269755	-	Promoter	NM_004152	0.00155415	60.5005
chr17	7253721	-	Intron	NM_014716	9.80289e-08	60.4932
chr22	24119679	-	Intron	NM_005940	0.000560105	60.4839
chr11	809601	+	Promoter	NM_001004	9.91458e-11	60.4814
chr11	809605	+	Promoter	NM_001004	9.91458e-11	60.4814
chr11	809735	+	Promoter	NM_001004	9.91458e-11	60.4814
chr22	19138327	+	Promoter	NM_005315	3.2266e-19	60.4775
chr22	19138404	+	Promoter	NM_005315	3.2266e-19	60.4775
chr7	1275061	+	Intron	NM_001080461	0.000209854	60.4735
chr10	6131004	-	Exon	NM_032905	9.67679e-16	60.4672
chr8	23584021	+	-	-	9.08887e-10	60.4592
chr6	15525177	-	Intron	NM_001271667,NM_001271668,NM_001271669,NM_032122,NM_183040,NR_036448	1.22658e-10	60.4458
chr20	3052762	-	Promoter	NM_000915	3.23715e-06	60.4339
chr7	1022058	+	Promoter	NM_017781	1.07129e-13	60.4276
chr7	1802395	+	-	-	0.000320951	60.4163
chr11	809742	+	Promoter	NM_001004	9.91458e-11	60.3921
chr11	809642	+	Promoter	NM_001004	1.10598e-10	60.3911
chr5	16179411	+	Exon	NM_001102562	1.42354e-08	60.3391
chr5	16179444	+	Exon	NM_001102562	1.42354e-08	60.3391
chr5	16179545	+	Exon	NM_001102562	1.42354e-08	60.3391
chr5	16179553	+	Exon	NM_001102562	1.42354e-08	60.3391
chr10	6131002	-	Exon	NM_032905	2.41493e-15	60.3241
chr22	22863146	-	Exon	NM_080764	5.75328e-14	60.3202
chr4	2419132	-	Intron	NM_001172658	0.000271855	60.3171
chr4	2419148	-	Intron	NM_001172658	0.000271855	60.3171
chr9	842487	+	Promoter	NM_021951	0.00143375	60.3166
chr4	569367	-	-	-	1.01728e-09	60.3128
chr1	10895947	+	-	-	4.44303e-09	60.3055
chr10	6131025	-	Exon	NM_032905	8.31867e-15	60.2756
chr11	1751124	+	Intron	NM_053005	6.20061e-08	60.2669
chr3	13036259	-	Intron	NM_001134382	5.45167e-10	60.2496
chr8	23584094	+	-	-	1.85317e-09	60.2464
chr6	9777652	+	-	-	0.000496594	60.2399
chr8	23584039	+	-	-	1.85317e-09	60.2271
chr5	16179430	+	Exon	NM_001102562	2.58168e-08	60.2102
chr22	19138396	+	Promoter	NM_005315	1.9966e-19	60.2045
chr3	13036129	-	Intron	NM_001134382	6.30239e-09	60.1981
chr4	1535737	-	-	-	5.778e-05	60.1958
chr1	1497020	+	Intron	NM_014188	0.000586242	60.1866
chr22	19138359	+	Promoter	NM_005315	3.2266e-19	60.1852
chr4	2419119	-	Intron	NM_001172658	0.000281007	60.1687
chr4	2419123	-	Intron	NM_001172658	0.000281007	60.1687
chr4	2419126	-	Intron	NM_001172658	0.000281007	60.1687
chr4	2419137	-	Intron	NM_001172658	0.000281007	60.1687
chr4	2419181	-	Intron	NM_001172658	0.000281007	60.1687
chr20	25038791	-	Exon	NM_001252675,NM_001252677,NM_032501	1.16164e-05	60.1624
chr22	19138336	+	Promoter	NM_005315	2.09252e-19	60.1584
chr8	23584029	+	-	-	1.74456e-09	60.1436
chr12	250350	+	Exon	NM_001170738,NM_015232	6.13301e-09	60.1337
chr7	684134	+	Intron	NM_001164758,NM_001164759,NM_001164760,NM_001164761,NM_001164762,NM_002735	7.1746e-10	60.1324
chr8	23584002	+	-	-	1.54327e-10	60.132
chr8	23584098	+	-	-	1.85317e-09	60.1256
chr12	6649133	-	Exon	NM_001039670,NM_001193457,NM_080730,NR_036467	3.06181e-05	60.1232
chr16	158963	+	Intron	NM_001039476,NM_001077350,NM_001243247,NM_001243248,NM_001243249	5.25655e-13	60.1229
chr19	16134941	+	Intron	NR_026828	0.000417409	60.1067
chr12	849849	+	-	-	1.9039e-08	60.0947
chr3	13036146	-	Intron	NM_001134382	2.02037e-08	60.0946
chr8	23584042	+	-	-	1.77086e-09	60.0887
chr17	8191878	-	Exon	NM_201520	8.47378e-07	60.0836
chr22	24811022	+	Exon	NM_001145468,NM_001254732,NM_001254733,NM_015330	0.00024776	60.0766
chr10	6131103	-	Exon	NM_032905	3.28714e-15	60.0572
chr1	16767575	-	Promoter	NM_001145277,NM_001145278,NM_018090	0.00094313	59.9825
chr1	16767597	-	Promoter	NM_001145277,NM_001145278,NM_018090	0.00094313	59.9825
chr4	2419102	-	Intron	NM_001172658	0.000261025	59.9816
chr4	2419161	-	Intron	NM_001172658	0.000261025	59.9749
chr16	1515442	-	Intron	NM_001287	4.0999e-07	59.9576
chr1	19110722	-	-	-	2.06235e-11	59.9566
chr4	5016004	+	-	-	1.35367e-10	59.941
chr11	536726	-	Promoter	NM_198075	1.14512e-22	59.9388
chr22	17839360	-	-	-	2.8102e-06	59.9348
chr6	20364103	+	-	-	0.00111373	59.9145
chr5	16179523	+	Exon	NM_001102562	3.04853e-08	59.9118
chr2	3494372	-	-	-	7.54129e-12	59.9057
chr5	16179555	+	Exon	NM_001102562	1.42354e-08	59.9043
chr11	809610	+	Promoter	NM_001004	9.91458e-11	59.9
chr19	954798	+	Intron	NM_005224	0.00013678	59.8768
chr7	2106700	-	Intron	NM_001013836,NM_001013837,NM_003550	8.09717e-35	59.8765
chr22	19710749	-	Exon	NM_001009939,NM_002688	9.66132e-09	59.8552
chr20	3052848	-	Promoter	NM_000915	3.23715e-06	59.8439
chr6	10720419	-	-	-	1.67993e-05	59.8331
chr5	16179532	+	Exon	NM_001102562	3.04853e-08	59.8298
chr11	809644	+	Promoter	NM_001004	1.10598e-10	59.8097
chr18	18711633	-	-	-	1.14884e-11	59.7991
chr17	7219262	-	Promoter	NM_004489	1.00556e-06	59.785
chr19	10541535	+	Exon	NM_001111308	2.15434e-09	59.7792
chr19	6753622	-	Exon	NM_005490	2.17111e-08	59.7753
chr10	16726670	+	Intron	NM_012425,NM_152724	0.000800679	59.7717
chr15	22542555	+	-	-	8.66884e-26	59.7709
chr4	3392563	+	Intron	NM_002926,NM_198227,NM_198229	1.4759e-07	59.7644
chr17	20408846	-	-	-	0.000809636	59.7368
chr10	119579	-	-	-	2.51029e-07	59.7305
chr1	16767427	-	Promoter	NM_001145277,NM_001145278,NM_018090	0.000946507	59.7176
chr1	16767454	-	Promoter	NM_001145277,NM_001145278,NM_018090	0.000946507	59.7176
chr1	16767557	-	Promoter	NM_001145277,NM_001145278,NM_018090	0.000946507	59.7176
chr1	16767566	-	Promoter	NM_001145277,NM_001145278,NM_018090	0.000946507	59.7176
chr1	16767584	-	Promoter	NM_001145277,NM_001145278,NM_018090	0.000946507	59.7176
chr11	537504	+	Promoter	NM_198075	3.8183e-10	59.6981
chr11	809639	+	Promoter	NM_001004	3.59343e-10	59.6878
chr20	12749049	+	-	-	5.81604e-16	59.6864
chr22	22090780	-	Promoter	NM_013313	2.72242e-06	59.6756
chr19	11494753	+	Promoter	NM_000121,NR_033663	2.4569e-05	59.6719
chr16	3550081	-	Promoter	NM_015041	2.69532e-31	59.6657
chr1	18617818	-	Intron	NM_032880	9.45097e-08	59.6617
chr7	3144991	-	-	-	2.51466e-17	59.6521
chr16	1479357	+	Promoter	NM_001010878	1.24457e-09	59.6519
chr19	3464819	+	Exon	NM_001245002,NM_001245004,NM_001245005,NM_005597,NM_205843	0.00101968	59.636
chr19	2120130	-	Intron	NM_001261826,NM_003938	4.66265e-16	59.6249
chr10	13862911	+	Intron	NM_018027	1.29493e-09	59.5999
chr1	1010769	+	-	-	1.87349e-05	59.5983
chr4	2419171	-	Intron	NM_001172658	0.000281007	59.594
chr4	2419178	-	Intron	NM_001172658	0.000281007	59.594
chr9	5629739	-	Promoter	NM_001135920,NM_001206557,NM_020829	3.89324e-18	59.5768
chr19	6753636	-	Exon	NM_005490	4.00322e-08	59.5741
chr6	2765831	-	Exon	NM_020135,NM_130395	1.189e-10	59.529
chr19	6753602	-	Exon	NM_005490	2.17111e-08	59.5206
chr5	18054413	+	-	-	5.80634e-07	59.518
chr19	10541545	+	Exon	NM_001111308	2.15665e-09	59.5015
chr4	2419176	-	Intron	NM_001172658	0.000287519	59.4994
chr11	17565826	+	Exon	NM_005709,NM_153676	8.72488e-31	59.4848
chr12	2144492	+	-	-	3.17129e-21	59.4784
chr5	16179525	+	Exon	NM_001102562	3.04853e-08	59.477
chr3	15150474	+	-	-	6.05236e-11	59.4702
chr2	2713000	+	-	-	0.000161235	59.4532
chr2	2713039	+	-	-	0.000161235	59.4532
chr19	5853874	-	-	-	1.95854e-07	59.4372
chr20	3052780	-	Promoter	NM_000915	3.23715e-06	59.4272
chr19	2429602	+	Exon	NM_032737	2.82798e-06	59.4193
chr10	3085783	-	-	-	1.91753e-08	59.3976
chr16	4043134	-	Intron	NM_001116	2.44114e-11	59.3726
chr11	809614	+	Promoter	NM_001004	3.59343e-10	59.3588
chr20	3052782	-	Promoter	NM_000915	3.434e-06	59.3579
chr6	10420756	+	Promoter	NM_001042425	7.09704e-06	59.3489
chr19	11494778	+	Exon	NM_000121,NR_033663	2.91065e-05	59.3429
chr1	16767420	-	Promoter	NM_001145277,NM_001145278,NM_018090	0.000946507	59.3359
chr10	405329	-	Intron	NM_014974	1.05147e-05	59.334
chr7	5147610	+	-	-	3.18865e-11	59.321
chr8	24858420	-	-	-	2.85921e-06	59.321
chr19	17798728	-	Promoter	NM_001080421	8.76654e-31	59.3149
chr16	10349229	-	-	-	0.00115016	59.3046
chr8	1004113	+	Intron	NR_073397,NR_073466	8.65799e-07	59.3023
chrX	11683572	+	Exon	NM_006125,NM_013427	0.000252344	59.2984
chrX	11683675	+	Exon	NM_006125,NM_013427	0.000252344	59.2984
chr11	279704	-	Intron	NM_138329	9.24895e-08	59.2981
chr5	16617401	+	Promoter	NM_001034850	8.90934e-10	59.2812
chr1	5710728	+	-	-	9.20533e-07	59.2707
chr7	5363817	+	Intron	NM_001080495	3.99972e-06	59.2696
chr19	4324570	-	Exon	NM_017720	0.000319615	59.2664
chr21	24473888	+	-	-	0.000200741	59.2659
chr1	3201535	+	Intron	NM_022114,NM_199454	7.41938e-13	59.262
chr11	537435	+	Promoter	NM_198075	1.36876e-09	59.2496
chr11	537452	+	Promoter	NM_198075	1.36876e-09	59.2496
chr11	537506	+	Promoter	NM_198075	1.36876e-09	59.2496
chr11	537509	+	Promoter	NM_198075	1.36876e-09	59.2496
chr11	537496	+	Promoter	NM_198075	1.62069e-09	59.2496
chr16	4430423	-	Intron	NM_138440	9.55613e-05	59.2434
chr20	18408926	-	Intron	NM_001099407	4.32391e-11	59.2391
chr22	19138342	+	Promoter	NM_005315	5.72141e-18	59.2336
chr7	1688227	-	-	-	8.03647e-07	59.218
chr3	11048859	-	Intron	NR_046647	0.000269774	59.2142
chr19	17133470	-	Intron	NM_015692	1.1402e-07	59.2123
chr19	6753524	-	Exon	NM_005490	4.33572e-08	59.2103
chr19	6753618	-	Exon	NM_005490	4.33572e-08	59.2103
chr14	24836122	+	Promoter	NM_001136022,NM_001198967	7.95756e-06	59.2064
chr19	13984877	-	Promoter	NR_029613	3.90096e-15	59.2014
chr8	23584018	+	-	-	1.25005e-08	59.2008
chr1	6572075	-	Intron	NM_198681	6.30429e-07	59.1916
chr3	13036109	-	Intron	NM_001134382	2.02107e-08	59.1885
chr3	13036113	-	Intron	NM_001134382	2.02107e-08	59.1885
chr3	13036118	-	Intron	NM_001134382	2.02107e-08	59.1885
chr3	13036281	-	Intron	NM_001134382	2.02107e-08	59.1885
chrX	11683627	+	Exon	NM_006125,NM_013427	0.000260972	59.1879
chr16	9144604	+	-	-	1.58892e-07	59.1766
chr7	2721047	-	Intron	NM_133463	3.73725e-07	59.1709
chr19	2291279	-	Exon	NM_001101391	3.68132e-08	59.1679
chr8	1894595	+	Intron	NM_014629	1.02549e-08	59.1429
chr19	6753526	-	Exon	NM_005490	4.33573e-08	59.1418
chr19	6753531	-	Exon	NM_005490	4.33573e-08	59.1418
chr19	6753551	-	Exon	NM_005490	4.33573e-08	59.1418
chr11	537476	+	Promoter	NM_198075	3.44802e-09	59.1371
chr19	6475265	-	Intron	NM_024898	1.42903e-08	59.1339
chr1	3229792	-	Intron	NM_022114,NM_199454	4.53149e-05	59.1333
chr6	2928287	+	-	-	0.000622577	59.1256
chr8	1772477	-	Promoter	NM_014629	9.48784e-16	59.1157
chr5	202625	-	-	-	0.00017839	59.0909
chr4	5053477	-	Promoter	NM_018401	2.38782e-06	59.0738
chr22	22090711	-	Promoter	NM_013313	2.33053e-06	59.0664
chr20	19194303	+	Intron	NM_020689	1.15374e-07	59.0607
chr19	12251074	+	Promoter	NM_001203250,NM_021143	5.01281e-15	59.0533
chr6	10398574	+	Exon	NM_001032280,NM_001042425,NM_003220	3.27676e-10	59.0187
chr5	16179408	+	Exon	NM_001102562	1.42354e-08	59.0071
chr7	990729	-	Intron	NM_006869	0.000654081	59
chrX	11683531	+	Exon	NM_006125,NM_013427	0.000487861	58.9986
chr8	1088031	+	-	-	3.27404e-14	58.9867
chr17	4683476	-	Intron	NM_003963	4.91475e-05	58.9827
chr13	20532351	+	Promoter	NM_001190964	3.61253e-06	58.977
chr13	20532430	+	Promoter	NM_001190964	3.61253e-06	58.977
chr13	20532448	+	Promoter	NM_001190964	3.61253e-06	58.977
chr13	20532457	+	Promoter	NM_001190964	3.61253e-06	58.977
chr13	20532440	+	Promoter	NM_001190964	3.61253e-06	58.977
chr11	536728	-	Promoter	NM_198075	1.98477e-21	58.9724
chr19	6753628	-	Exon	NM_005490	4.33573e-08	58.9721
chr7	1571105	+	Promoter	NM_002360	7.40717e-06	58.9657
chr7	532127	+	-	-	3.79129e-15	58.9636
chr19	12251057	+	Promoter	NM_001203250,NM_021143	2.51977e-15	58.962
chr19	3770743	-	Exon	NM_032753	8.58903e-12	58.9583
chr6	3751671	+	Exon	NM_183373	6.08417e-16	58.9482
chr19	10613804	-	Promoter	NM_012289	1.09264e-08	58.9323
chr10	20667970	+	-	-	0.000106727	58.9197
chr8	10192548	+	Intron	NM_001135670,NM_001135671,NM_001199729,NM_012331	4.1428e-12	58.9062
chr20	2539587	-	Intron	NM_080751	8.86409e-06	58.9051
chr19	835147	+	-	-	1.0064e-06	58.8893
chr1	12021569	+	Intron	NM_000302	4.59289e-09	58.8668
chr20	4729558	+	-	-	1.81562e-06	58.8646
chr8	10192585	+	Intron	NM_001135670,NM_001135671,NM_001199729,NM_012331	8.49313e-12	58.8441
chr10	15285207	+	Intron	NM_001010924	1.19346e-11	58.8432
chr13	20532391	+	Promoter	NM_001190964	3.61253e-06	58.8405
chr14	19888778	+	-	-	0.000335386	58.8382
chr1	24151752	+	Promoter	NM_000191,NM_001166059	8.09688e-23	58.8292
chr1	24151775	+	Promoter	NM_000191,NM_001166059	1.70139e-22	58.8131
chrX	11683538	+	Exon	NM_006125,NM_013427	0.000486442	58.813
chrX	11683546	+	Exon	NM_006125,NM_013427	0.000486442	58.813
chrX	11683548	+	Exon	NM_006125,NM_013427	0.000486442	58.813
chrX	11683559	+	Exon	NM_006125,NM_013427	0.000486442	58.813
chrX	11683664	+	Exon	NM_006125,NM_013427	0.000486442	58.813
chr9	19126856	-	Promoter	NM_001122,NR_038064	0.00201391	58.8051
chr19	3464798	+	Exon	NM_001245002,NM_001245004,NM_001245005,NM_005597,NM_205843	0.00165739	58.8027
chr22	19138426	+	Promoter	NM_005315	1.29767e-17	58.8008
chr10	14880343	+	Exon	NM_016299	4.48264e-11	58.7988
chr5	16179516	+	Exon	NM_001102562	9.18668e-09	58.7957
chr1	3539941	-	-	-	7.75451e-06	58.7864
chr20	23331931	-	Promoter	NM_013248	1.43385e-09	58.7812
chr20	23331960	-	Promoter	NM_013248	1.43385e-09	58.7812
chr20	23332003	-	Promoter	NM_013248	1.43385e-09	58.7812
chr6	10398516	+	Exon	NM_001032280,NM_001042425,NM_003220	3.83092e-10	58.776
chr2	10498147	+	Intron	NM_134421	2.16656e-05	58.7472
chr12	12470742	+	-	-	1.32028e-05	58.7463
chr1	24151829	+	Promoter	NM_000191,NM_001166059	9.70902e-23	58.7433
chr16	7307067	-	Intron	NM_001142333,NM_001142334,NM_018723	4.90344e-09	58.7336
chr7	19157651	-	Promoter	NM_000474	2.15614e-13	58.7283
chr7	1162396	+	Intron	NM_001134395,NM_001134396,NM_032350	1.95866e-15	58.7265
chr6	10398519	+	Exon	NM_001032280,NM_001042425,NM_003220	6.84196e-10	58.7232
chr7	219713	+	Intron	NM_020223	4.75112e-11	58.7051
chr16	2044871	-	-	-	0.00212235	58.6859
chr8	10192575	+	Intron	NM_001135670,NM_001135671,NM_001199729,NM_012331	1.03367e-11	58.6748
chr6	10398525	+	Exon	NM_001032280,NM_001042425,NM_003220	7.82733e-10	58.6704
chr1	24151826	+	Promoter	NM_000191,NM_001166059	1.83998e-22	58.6579
chr8	10192464	+	Intron	NM_001135670,NM_001135671,NM_001199729,NM_012331	8.49326e-12	58.6561
chr8	10192466	+	Intron	NM_001135670,NM_001135671,NM_001199729,NM_012331	8.49326e-12	58.6561
chr8	10192475	+	Intron	NM_001135670,NM_001135671,NM_001199729,NM_012331	8.49326e-12	58.6561
chr8	10192492	+	Intron	NM_001135670,NM_001135671,NM_001199729,NM_012331	8.49326e-12	58.6561
chr19	1757659	-	Intron	NM_001080488	6.29658e-09	58.6474
chr13	20532358	+	Promoter	NM_001190964	3.61253e-06	58.6437
chr3	10548622	-	-	-	1.12324e-08	58.6189
chr6	3751628	+	Exon	NM_183373	1.51511e-15	58.6168
chr5	8137368	+	-	-	2.3966e-06	58.6103
chr4	1397261	-	-	-	8.41494e-10	58.5992
chr19	12251039	+	Promoter	NM_001203250,NM_021143	5.01281e-15	58.59
chr12	9217463	+	Exon	NR_034140	4.8368e-16	58.5873
chr12	15942418	-	Exon	NM_004447	3.08949e-06	58.5815
chr1	24151834	+	Promoter	NM_000191,NM_001166059	1.93703e-22	58.5714
chr6	3751549	+	Exon	NM_183373	6.08417e-16	58.5694
chr6	3751558	+	Exon	NM_183373	6.08417e-16	58.5694
chr6	3751561	+	Exon	NM_183373	6.08417e-16	58.5694
chr6	3751637	+	Exon	NM_183373	6.08417e-16	58.5694
chr6	3751663	+	Exon	NM_183373	6.08417e-16	58.5694
chr6	3751666	+	Exon	NM_183373	6.08417e-16	58.5694
chr6	3751641	+	Exon	NM_183373	6.08417e-16	58.5694
chr15	22026769	+	-	-	8.38153e-07	58.5608
chr19	1302677	-	-	-	7.29612e-07	58.5549
chr6	10398528	+	Exon	NM_001032280,NM_001042425,NM_003220	8.38264e-10	58.5543
chr6	10398522	+	Exon	NM_001032280,NM_001042425,NM_003220	7.82733e-10	58.5423
chr11	537487	+	Promoter	NM_198075	1.36876e-09	58.5353
chr19	740726	-	Intron	NM_002579	3.12173e-12	58.5342
chr20	3052851	-	Promoter	NM_000915	1.22609e-05	58.5281
chr4	1040967	+	-	-	2.40156e-06	58.5244
chr20	2539541	-	Intron	NM_080751	1.06461e-05	58.5175
chr1	9064672	+	Intron	NM_207420	0.000305463	58.5126
chr2	8685268	+	-	-	3.91035e-07	58.4976
chr6	21666447	+	Promoter	NR_015410	2.5991e-14	58.4943
chr17	7253334	-	Exon	NM_014716	0.00449078	58.4907
chr14	24836172	+	Exon	NM_001136022,NM_001198967	8.31575e-06	58.4734
chr14	24836140	+	Promoter	NM_001136022,NM_001198967	8.31575e-06	58.4734
chr4	24474450	+	-	-	0.00171522	58.4699
chr19	11960208	+	-	-	3.84498e-06	58.4678
chrX	11683534	+	Exon	NM_006125,NM_013427	0.000487861	58.461
chr19	8017716	+	-	-	1.23831e-07	58.4571
chr4	2419141	-	Intron	NM_001172658	0.000281007	58.4446
chr16	14403569	+	Promoter	NR_029854	2.14497e-11	58.4433
chr16	3550132	-	Promoter	NM_015041	1.47978e-16	58.4296
chr5	2748712	+	Exon	NM_001134222,NM_033267	1.97068e-06	58.4283
chr1	24151818	+	Promoter	NM_000191,NM_001166059	2.26799e-22	58.4201
chr13	19402427	+	-	-	0.000131089	58.4115
chr20	23332013	-	Promoter	NM_013248	4.37011e-09	58.4107
chr13	20532420	+	Promoter	NM_001190964	4.31899e-06	58.4023
chr6	21666440	+	Promoter	NR_015410	4.52464e-14	58.3996
chr11	833417	+	Promoter	NM_001039490,NM_004357,NM_139029,NM_139030	1.20308e-07	58.3949
chr6	10398494	+	Exon	NM_001032280,NM_001042425,NM_003220	7.82733e-10	58.388
chr7	1516774	+	Intron	NM_001080453	2.06712e-08	58.3609
chr19	12251050	+	Promoter	NM_001203250,NM_021143	6.10667e-15	58.3533
chr14	24836169	+	Exon	NM_001136022,NM_001198967	8.71384e-06	58.3369
chr14	24836183	+	Exon	NM_001136022,NM_001198967	8.71384e-06	58.3369
chr19	17453169	+	Exon	NM_001128855,NM_001195422,NM_032620,NM_133644	1.37068e-05	58.3333
chr12	1905706	-	Intron	NM_172364	2.02515e-14	58.3256
chr12	1905726	-	Intron	NM_172364	2.02515e-14	58.3256
chr19	4258469	-	Intron	NM_018074	4.09379e-10	58.321
chr17	7253695	-	Intron	NM_014716	9.80289e-08	58.3193
chr17	7253707	-	Intron	NM_014716	9.80289e-08	58.3193
chr17	7253719	-	Intron	NM_014716	9.80289e-08	58.3193
chr12	9217442	+	Exon	NR_034140	4.8368e-16	58.2914
chr12	9217512	+	Exon	NR_034140	4.8368e-16	58.2914
chr19	3631182	-	Exon	NM_001195733,NM_012398	0.00476349	58.2873
chr10	2543918	-	-	-	6.18546e-13	58.287
chr6	3751569	+	Exon	NM_183373	1.57799e-15	58.2837
chr19	1523773	+	Promoter	NM_001243079	5.45556e-13	58.2823
chrX	11683660	+	Exon	NM_006125,NM_013427	0.000486442	58.2754
chr14	24836148	+	Exon	NM_001136022,NM_001198967	8.71384e-06	58.2745
chr18	5542876	+	Intron	NM_012307	9.9938e-05	58.265
chr17	21454692	-	Exon	NM_001113434	0.00388311	58.2583
chr19	5686524	+	Exon	NM_001267868,NM_198533,NM_198706,NM_198707	1.62013e-22	58.2463
chr16	716183	+	-	-	1.33364e-08	58.2331
chr16	2043016	-	Exon	NM_004209	0.00202317	58.2267
chr19	12251066	+	Promoter	NM_001203250,NM_021143	5.01281e-15	58.2154
chr21	15430720	+	-	-	6.09e-10	58.2131
chr11	2232892	+	-	-	1.47832e-12	58.2021
chr11	968956	+	Intron	NM_001242837,NM_012305	0.00301013	58.2018
chr2	24163423	-	Promoter	NM_181713	3.29135e-24	58.2001
chr11	2550624	+	Intron	NM_000218,NR_040711	4.37897e-07	58.1897
chr13	20532461	+	Promoter	NM_001190964	3.61253e-06	58.1834
chr5	16179448	+	Exon	NM_001102562	1.10973e-08	58.1822
chr19	17337845	+	Exon	NM_024578	1.98673e-17	58.1662
chr19	17337770	+	Promoter	NM_024578	1.98673e-17	58.1662
chr16	1140560	+	Exon	NM_207419	6.77617e-16	58.1644
chr10	6131091	-	Exon	NM_032905	2.29549e-12	58.1639
chr8	10192469	+	Intron	NM_001135670,NM_001135671,NM_001199729,NM_012331	2.0343e-11	58.1511
chr7	856234	+	Promoter	NM_001171944,NM_001171945,NM_025154	4.76113e-16	58.1452
chr6	10398486	+	Exon	NM_001032280,NM_001042425,NM_003220	1.54853e-09	58.1396
chr20	2539533	-	Intron	NM_080751	2.4466e-05	58.1299
chr20	2539553	-	Intron	NM_080751	2.4466e-05	58.1299
chr17	4869567	+	Intron	NM_004890	1.68945e-12	58.115
chr6	3751542	+	Exon	NM_183373	6.08417e-16	58.0977
chr17	9024766	-	Intron	NM_004822	5.68417e-06	58.0949
chr19	1112418	+	Exon	NM_001100122,NM_014963	0.000678131	58.0826
chr19	17337821	+	Exon	NM_024578	1.98673e-17	58.0811
chr4	3882392	-	-	-	5.03433e-05	58.0672
chr17	4542646	-	Intron	NM_001140	2.34651e-14	58.0633
chr1	3229876	-	Intron	NM_022114,NM_199454	0.000133248	58.0632
chr17	7253850	-	Intron	NM_014716	6.81576e-07	58.047
chr15	22545480	+	-	-	2.164e-11	58.032
chr6	3751581	+	Exon	NM_183373	1.42693e-15	58.0189
chr17	2905662	-	Intron	NM_001100398,NM_015085	1.96636e-12	58.0092
chr6	21666442	+	Promoter	NR_015410	2.10805e-14	58.0046
chr11	833401	+	Promoter	NM_001039490,NM_004357,NM_139029,NM_139030	3.67229e-07	58.0045
chr16	2241664	+	Intron	NM_020764	1.65661e-05	57.988
chr3	13036132	-	Intron	NM_001134382	7.48717e-08	57.9789
chr10	2878122	-	-	-	1.7796e-09	57.9709
chr11	833382	+	Promoter	NM_001039490,NM_004357,NM_139029,NM_139030	1.82218e-07	57.9667
chr5	24872316	-	-	-	5.33626e-07	57.9617
chr11	1886444	-	Promoter	NM_001242932	1.97113e-07	57.9462
chr1	3038216	+	Intron	NM_022114,NM_199454	9.83862e-16	57.9404
chr4	8942103	-	-	-	2.40533e-05	57.9389
chr17	1131388	-	-	-	7.16968e-12	57.9355
chr11	833345	+	Promoter	NM_001039490,NM_004357,NM_139029,NM_139030	3.87211e-07	57.9225
chr11	833443	+	Promoter	NM_001039490,NM_004357,NM_139029,NM_139030	3.87211e-07	57.9225
chr11	833445	+	Promoter	NM_001039490,NM_004357,NM_139029,NM_139030	3.87211e-07	57.9225
chr17	2756701	+	Intron	NM_001100398,NM_015085	1.96214e-06	57.9199
chr20	3074287	+	-	-	7.20797e-05	57.9173
chrX	3733653	+	-	-	1.58607e-12	57.9157
chr11	833413	+	Promoter	NM_001039490,NM_004357,NM_139029,NM_139030	4.48152e-07	57.9102
chr17	1173869	+	Exon	NM_001164405	6.75064e-10	57.9082
chr20	379930	+	-	-	0.00155303	57.9005
chr14	24836137	+	Promoter	NM_001136022,NM_001198967	8.71384e-06	57.8983
chr19	6753542	-	Exon	NM_005490	2.48413e-07	57.8942
chr2	928984	-	-	-	2.8001e-11	57.893
chr4	1714138	+	Promoter	NM_006527	1.26647e-16	57.8908
chr18	9708891	-	Promoter	NM_006868	2.42809e-31	57.8872
chrX	3733615	+	-	-	3.81189e-12	57.8773
chrX	3733640	+	-	-	3.81189e-12	57.8773
chrX	3733746	+	-	-	3.81189e-12	57.8773
chrX	3733758	+	-	-	3.81189e-12	57.8773
chrX	3733761	+	-	-	3.81189e-12	57.8773
chrX	3733772	+	-	-	3.81189e-12	57.8773
chrX	3733781	+	-	-	3.81189e-12	57.8773
chr4	8017184	+	Intron	NM_001130086,NM_001130087,NM_001130088,NM_032432	0.000341809	57.8742
chr11	925796	-	Promoter	NM_001242837,NM_012305	2.40674e-05	57.8536
chr4	3308445	-	-	-	1.02446e-25	57.8464
chr3	12705814	-	Promoter	NM_002880	1.69819e-25	57.8459
chr19	6753639	-	Exon	NM_005490	3.25042e-07	57.8444
chr11	833431	+	Promoter	NM_001039490,NM_004357,NM_139029,NM_139030	3.95438e-07	57.8357
chrX	3733621	+	-	-	7.96837e-12	57.8277
chr4	1714200	+	Promoter	NM_006527	3.24873e-16	57.8176
chr11	3662811	+	Promoter	NM_001079536	2.45094e-08	57.8041
chr2	20569077	+	-	-	6.41616e-06	57.7949
chr12	15942444	-	Exon	NM_004447	8.33687e-06	57.7942
chr19	24097810	+	Promoter	NM_001244038	4.36481e-09	57.7874
chr20	23331935	-	Promoter	NM_013248	1.69424e-09	57.7812
chr19	1467987	+	Exon	NM_005883	1.29274e-16	57.7782
chr5	2748570	+	Exon	NM_001134222,NM_033267	4.89216e-07	57.7694
chr5	1618342	-	Intron	NR_003713	9.87109e-07	57.7647
chr8	21989357	-	Promoter	NM_005144,NM_018411	2.55147e-05	57.7641
chr19	9957069	+	Intron	NM_006221,NR_038422,NR_038830	2.98641e-06	57.764
chrX	3733736	+	-	-	3.81189e-12	57.7589
chr4	1714122	+	Promoter	NM_006527	3.25819e-16	57.7388
chr16	3210222	+	-	-	2.06024e-05	57.736
chr3	10712402	-	-	-	5.14855e-05	57.714
chr19	17337852	+	Exon	NM_024578	5.45117e-17	57.7094
chr1	11515553	+	-	-	3.6973e-05	57.7078
chr16	11620988	-	-	-	1.18541e-14	57.6979
chr7	1471819	-	-	-	1.34674e-15	57.694
chr12	1905773	-	Intron	NM_172364	2.02515e-14	57.6886
chr19	18480809	+	-	-	1.66713e-21	57.683
chr4	8861548	-	-	-	0.000589173	57.6621
chr1	1404591	-	-	-	7.03989e-06	57.6539
chr10	12599407	+	Intron	NM_020397,NM_153498	0.0025315	57.6529
chr4	1714118	+	Promoter	NM_006527	3.24873e-16	57.6498
chr4	1714141	+	Promoter	NM_006527	3.24873e-16	57.6498
chr16	1341592	+	-	-	1.17722e-15	57.6494
chr6	3751669	+	Exon	NM_183373	1.22618e-15	57.6479
chr13	21517286	-	-	-	2.22297e-15	57.6451
chr1	24151850	+	Promoter	NM_000191,NM_001166059	1.0459e-22	57.6442
chr12	15942420	-	Exon	NM_004447	9.45862e-06	57.6391
chr19	17337838	+	Exon	NM_024578	1.31397e-16	57.6107
chr6	3751648	+	Exon	NM_183373	7.90457e-15	57.6079
chr3	12705870	-	Promoter	NM_002880	1.40325e-25	57.6077
chr17	3572476	-	Exon	NM_001014764,NM_031298	3.60424e-13	57.5876
chr19	919699	+	Intron	NM_032551	7.72705e-12	57.5754
chr4	1714131	+	Promoter	NM_006527	6.80621e-16	57.5724
chr11	1331506	-	Exon	NR_029409	9.96644e-08	57.5661
chr7	856301	+	Exon	NM_001171944,NM_001171945,NM_025154	5.70519e-16	57.5589
chr22	19166369	-	Promoter	NM_001256534,NR_033687	2.41033e-14	57.5506
chr4	1714113	+	Promoter	NM_006527	3.47379e-16	57.549
chr4	1714208	+	Promoter	NM_006527	3.47379e-16	57.549
chr4	1714216	+	Promoter	NM_006527	3.47379e-16	57.549
chr3	12705833	-	Promoter	NM_002880	3.13039e-25	57.5312
chr3	10785957	-	-	-	0.00196394	57.5214
chr6	3751563	+	Exon	NM_183373	7.90457e-15	57.5194
chr4	6565371	+	Promoter	NM_001206994	1.69947e-06	57.4963
chr8	10192461	+	Intron	NM_001135670,NM_001135671,NM_001199729,NM_012331	5.24597e-11	57.496
chr10	23785349	+	-	-	5.36124e-07	57.4855
chr8	6264182	-	Exon	NM_001172574,NM_001172575,NM_024596	3.92741e-06	57.4836
chr8	6264243	-	Promoter	NM_001172574,NM_001172575,NM_024596	3.92741e-06	57.4836
chr4	1714192	+	Promoter	NM_006527	3.61888e-16	57.4836
chr11	833419	+	Promoter	NM_001039490,NM_004357,NM_139029,NM_139030	3.87211e-07	57.472
chr11	833433	+	Promoter	NM_001039490,NM_004357,NM_139029,NM_139030	3.87211e-07	57.472
chr17	2756614	+	Intron	NM_001100398,NM_015085	2.60775e-06	57.4653
chr17	2756624	+	Intron	NM_001100398,NM_015085	2.60775e-06	57.4653
chr17	2756632	+	Intron	NM_001100398,NM_015085	2.60775e-06	57.4653
chr6	21666391	+	Promoter	NR_015410	2.16143e-12	57.4618
chr3	12705794	-	Promoter	NM_002880	1.6322e-24	57.4549
chr7	575516	+	-	-	7.60713e-05	57.4547
chr19	1089643	+	Intron	NM_002695	0.000517496	57.4507
chr17	3572486	-	Exon	NM_001014764,NM_031298	4.44495e-13	57.4421
chr19	17337754	+	Promoter	NM_024578	1.98673e-17	57.4374
chr1	16974182	+	Intron	NR_027504	1.05729e-15	57.4248
chr4	1714225	+	Promoter	NM_006527	4.15545e-16	57.412
chr7	2443837	-	Promoter	NM_001243794,NM_001243795,NM_018641	1.57988e-05	57.4115
chr7	2443845	-	Promoter	NM_001243794,NM_001243795,NM_018641	1.57988e-05	57.4115
chr7	2443885	-	Promoter	NM_001243794,NM_001243795,NM_018641	1.57988e-05	57.4115
chr19	14172929	+	-	-	2.66421e-07	57.4038
chr17	3572447	-	Exon	NM_001014764,NM_031298	2.03986e-13	57.3982
chr12	15942289	-	Exon	NM_004447	8.33687e-06	57.391
chr12	15942295	-	Exon	NM_004447	8.33687e-06	57.391
chr12	15942404	-	Exon	NM_004447	8.33687e-06	57.391
chr12	15942412	-	Exon	NM_004447	8.33687e-06	57.391
chr12	15942451	-	Exon	NM_004447	8.33687e-06	57.391
chr17	3572449	-	Exon	NM_001014764,NM_031298	4.64953e-13	57.382
chr17	3572463	-	Exon	NM_001014764,NM_031298	4.64953e-13	57.382
chr17	3572513	-	Exon	NM_001014764,NM_031298	4.64953e-13	57.382
chr16	3184426	-	Promoter	NM_001134655	5.99891e-27	57.3716
chr18	1521589	+	-	-	0.000272862	57.3688
chr4	8372841	-	Intron	NM_003501	3.79184e-27	57.3654
chr3	4508725	-	Exon	NM_001164674,NM_001164675,NM_182760	1.37286e-19	57.3553
chr8	6264194	-	Exon	NM_001172574,NM_001172575,NM_024596	4.11742e-06	57.3497
chr17	3572495	-	Exon	NM_001014764,NM_031298	7.67351e-13	57.3441
chr3	12705836	-	Promoter	NM_002880	7.26871e-25	57.3298
chr19	2803768	+	Intron	NM_003249	0.00285253	57.3115
chr11	1080251	-	Intron	NM_002457	1.82884e-18	57.3078
chr12	15942329	-	Exon	NM_004447	8.33687e-06	57.2992
chr2	10216846	-	Intron	NM_001037160	1.28443e-11	57.2907
chrX	3733624	+	-	-	3.81189e-12	57.2858
chr4	1714218	+	Promoter	NM_006527	4.15545e-16	57.2804
chr17	1634138	-	Exon	NM_001163673,NM_001163809,NM_001163811,NM_152348	3.44973e-05	57.2702
chr4	645423	+	Intron	NM_000283,NM_001145291	3.3066e-12	57.2604
chr19	11960273	+	-	-	3.67963e-06	57.2549
chr11	20067129	+	Exon	NM_001111018,NM_001111019,NM_001244963,NM_145117,NM_182964	5.45541e-06	57.2534
chr1	1968037	+	-	-	0.000570967	57.2245
chr12	15942333	-	Exon	NM_004447	8.33687e-06	57.2059
chr6	3068833	+	-	-	1.92532e-16	57.2037
chrX	11683671	+	Exon	NM_006125,NM_013427	0.000486442	57.2001
chr1	9662320	+	Exon	NM_001010866	4.68431e-08	57.1997
chr3	12705806	-	Promoter	NM_002880	1.80598e-24	57.1972
chr3	13921744	+	Promoter	NM_004625	1.44624e-07	57.1972
chr19	13955831	-	-	-	0.00465905	57.197
chr19	10394744	+	-	-	2.19734e-05	57.1952
chr17	3572507	-	Exon	NM_001014764,NM_031298	8.52917e-13	57.1828
chr10	3374242	+	-	-	0.000537033	57.1649
chr3	13921724	+	Promoter	NM_004625	1.36159e-07	57.1601
chr1	2990130	-	Intron	NM_022114,NM_199454	1.27369e-06	57.1598
chr17	3572440	-	Exon	NM_001014764,NM_031298	1.41668e-12	57.1449
chr19	7755253	+	Intron	NM_001207019,NM_001220500,NM_002002	3.48405e-12	57.1424
chr17	7736522	-	Exon	NM_020877	3.72356e-08	57.1422
chr10	13344618	+	-	-	4.13741e-09	57.1414
chr19	24097703	+	Promoter	NM_001244038	2.73841e-08	57.14
chr17	7757904	+	Exon	NM_001080424	7.31022e-10	57.1385
chr17	3572510	-	Exon	NM_001014764,NM_031298	2.00657e-12	57.1325
chr19	16010884	+	-	-	3.49717e-11	57.1212
chr16	11621008	-	-	-	7.37313e-14	57.1114
chr22	24110878	-	Promoter	NM_213720	3.17987e-25	57.1102
chr17	175235	+	Intron	NM_001190411,NM_001190412,NM_001190413,NM_006987	8.57779e-08	57.0905
chr3	12705784	-	Promoter	NM_002880	1.40325e-25	57.0869
chrX	3733618	+	-	-	3.81189e-12	57.0837
chrX	3733753	+	-	-	3.81189e-12	57.0837
chr17	6401333	+	Intron	NM_001165966,NM_031220	6.77238e-17	57.0817
chr16	4851269	-	Intron	NR_046480	1.68498e-08	57.0712
chr11	833340	+	Promoter	NM_001039490,NM_004357,NM_139029,NM_139030	1.30039e-06	57.0529
chr17	2301966	-	Intron	NM_020310	7.88847e-07	57.0524
chr20	2539610	-	Intron	NM_080751	5.8354e-09	57.0411
chr4	1714206	+	Promoter	NM_006527	3.47379e-16	57.0388
chr3	9864046	+	Intron	NM_001025930,NM_001198793,NR_037162	2.28144e-08	57.0343
chrX	3733764	+	-	-	9.32723e-12	57.0326
chr2	20689429	+	-	-	4.76403e-19	57.0307
chr8	16859520	+	Exon	NM_019851	8.04506e-10	57.0244
chr15	22806063	-	-	-	9.33171e-10	57.0116
chr11	833347	+	Promoter	NM_001039490,NM_004357,NM_139029,NM_139030	3.87211e-07	57.005
chr19	11960313	+	-	-	3.8453e-06	56.9972
chr9	842531	+	Promoter	NM_021951	8.51597e-06	56.9907
chr19	1299884	-	Exon	NM_001405	1.65233e-05	56.9895
chr19	4639446	-	Promoter	NM_001167942	1.65453e-06	56.9892
chr12	15942285	-	Exon	NM_004447	8.33687e-06	56.9878
chr17	3572499	-	Exon	NM_001014764,NM_031298	1.55532e-12	56.9836
chr16	11439441	+	Exon	NM_152308	9.37441e-07	56.9635
chr3	4508813	-	Exon	NM_001164674,NM_001164675,NM_182760	5.62082e-21	56.9537
chr16	11621020	-	-	-	6.83979e-14	56.9501
chr20	2188569	-	-	-	3.66475e-10	56.9466
chr8	1615559	-	Intron	NM_004745	1.00614e-08	56.9461
chr17	3572491	-	Exon	NM_001014764,NM_031298	2.41023e-12	56.9385
chr5	2124122	-	-	-	2.249e-08	56.9229
chr3	12705686	+	Exon	NM_002880	4.78733e-16	56.9185
chr16	2848640	+	Promoter	NM_001135086	6.7862e-10	56.8931
chr10	2333048	+	-	-	3.53863e-05	56.8811
chr18	10455131	-	Promoter	NM_153000	7.69669e-07	56.8672
chr22	19420400	-	Promoter	NM_003776	8.10848e-07	56.8646
chr9	21696879	-	-	-	9.09817e-14	56.8562
chr11	1050445	+	-	-	0.000399204	56.842
chr19	17873655	+	-	-	1.96051e-10	56.8363
chr22	23503985	+	Exon	NM_004914	2.68589e-05	56.8358
chr8	16859526	+	Exon	NM_019851	1.01503e-09	56.8323
chr19	4639454	-	Promoter	NM_001167942	1.63813e-06	56.8304
chr17	172318	-	Intron	NM_001190411,NM_001190412,NM_001190413,NM_006987	0.000121614	56.8182
chr12	15942408	-	Exon	NM_004447	8.33687e-06	56.8163
chr18	22520490	+	-	-	9.95751e-05	56.795
chr4	15006593	-	Intron	NM_001177381,NM_001177382,NM_001177383,NM_001177384,NM_182485,NM_182646	3.68564e-05	56.7936
chr19	18058459	-	-	-	1.7351e-05	56.7787
chr8	22548648	+	Exon	NM_001199880,NM_001199881,NM_004430	6.91052e-14	56.7779
chr4	10118266	-	Promoter	NM_005112,NM_017491	7.32098e-27	56.7771
chr12	15942425	-	Exon	NM_004447	1.64561e-05	56.7522
chr5	3188101	-	-	-	0.000571583	56.7492
chr7	2556071	+	Intron	NM_001166355	9.5357e-08	56.7457
chr10	12770061	-	Intron	NM_020397,NM_153498	1.19207e-07	56.7391
chr3	12705863	-	Promoter	NM_002880	8.68185e-25	56.7365
chr19	4971568	-	Intron	NM_015015	7.25646e-17	56.7355
chr12	15942437	-	Exon	NM_004447	8.33687e-06	56.7245
chr16	11620899	-	-	-	9.906e-13	56.6924
chr5	16617370	+	Promoter	NM_001034850	1.07912e-09	56.6832
chr16	11620946	-	-	-	6.59432e-12	56.6483
chr11	4115952	+	Exon	NM_001033	1.04004e-17	56.645
chr2	9248470	+	-	-	3.09613e-21	56.6304
chr3	13921682	+	Promoter	NM_004625	3.09642e-07	56.6225
chr3	13921696	+	Promoter	NM_004625	3.09642e-07	56.6225
chr3	13921707	+	Promoter	NM_004625	3.09642e-07	56.6225
chr3	13921720	+	Promoter	NM_004625	3.09642e-07	56.6225
chr19	18529983	+	Promoter	NM_001009998,NM_032627	1.05639e-05	56.6199
chr20	3748513	-	Promoter	NM_001039140,NM_001258429,NM_001258430	0.000637227	56.6012
chr17	7752710	-	Exon	NM_001080424	1.31071e-05	56.5989
chr3	4508739	-	Exon	NM_001164674,NM_001164675,NM_182760	6.98202e-20	56.5974
chr4	8894701	+	-	-	7.47743e-12	56.5851
chr1	12227507	-	Promoter	NM_001066	1.85468e-06	56.571
chr10	681601	-	Intron	NM_014974	1.98666e-05	56.5686
chr16	3635139	-	Intron	NM_032444	9.90389e-08	56.5663
chr19	3535272	+	Exon	NM_001136197,NM_001136198,NM_016263	3.75963e-08	56.5625
chr8	22089341	+	Exon	NM_001099335,NM_014759	8.00828e-08	56.5489
chr8	16859473	+	Exon	NM_019851	1.01503e-09	56.5482
chr10	8408190	+	-	-	4.05735e-13	56.543
chr6	1621049	+	-	-	2.90416e-07	56.5397
chr7	5536802	+	Intron	NM_024963	1.4318e-10	56.5344
chr8	6264179	-	Exon	NM_001172574,NM_001172575,NM_024596	3.92742e-06	56.5343
chr1	2464413	-	-	-	3.88316e-14	56.5134
chr11	4115944	+	Exon	NM_001033	1.04004e-17	56.4996
chr1	950928	+	-	-	6.56724e-06	56.497
chr11	4115955	+	Exon	NM_001033	2.08346e-17	56.4958
chr3	13921750	+	Promoter	NM_004625	3.38357e-07	56.4822
chr4	7760347	-	Intron	NR_026892	2.48865e-14	56.4778
chr9	4662545	-	Intron	NM_001039395	3.12215e-10	56.4678
chr17	8012896	+	Intron	NM_001165960,NM_021628	3.41418e-07	56.4644
chr19	16653268	+	Promoter	NM_006387	8.9427e-15	56.4641
chr19	9434715	-	Exon	NM_001202406,NM_001202407,NM_001202408,NM_001202409,NM_001202410,NM_001202411,NM_032497	0.000269619	56.4609
chr17	4120701	+	Intron	NR_047571	4.12567e-05	56.4546
chr19	4639523	-	Promoter	NM_001167942	1.73799e-06	56.4516
chr3	4508780	-	Exon	NM_001164674,NM_001164675,NM_182760	1.49673e-19	56.4505
chr7	2443914	-	Promoter	NM_001243794,NM_001243795,NM_018641	1.57988e-05	56.4499
chr16	11620902	-	-	-	7.8085e-12	56.4347
[truncated: 6,617 more rows]

## Sheet: 10 weeks PC left
Asymmetrically methylated CpG sites in the left spinal cord at 10 weeks PC
Chr	Position	Strand	Feature	GeneID	p value	mean methylation difference
chr20	32450585	+	-	-	8.04547e-85	-100
chr8	28929150	-	Exon	NM_015254	1.5853e-62	-100
chr1	20728142	-	Intron	NR_033887	3.8053e-48	-100
chr15	53081322	+	Exon	NM_004498	5.9127e-46	-100
chr12	105098585	+	Intron	NM_001173982,NM_018413	8.70855e-46	-100
chr13	20876140	-	-	-	1.33943e-40	-100
chr22	48907703	+	Intron	NM_001082967	1.4186e-31	-100
chr8	8699522	+	Intron	NM_004225	8.05763e-27	-100
chr16	3905467	+	Intron	NM_001079846,NM_004380	1.76232e-26	-100
chr12	132962919	-	-	-	9.05522e-25	-100
chr6	15505452	+	Intron	NM_001267040,NM_004973	3.11047e-24	-100
chrX	152938820	-	Promoter	NM_001039582	1.49546e-21	-100
chrX	152938925	-	Promoter	NM_001039582	1.49546e-21	-100
chr16	28564888	+	Promoter	NM_138414	5.39364e-21	-100
chr1	9904359	-	-	-	6.01025e-21	-100
chr19	38876375	+	Exon	NM_152657	1.19651e-20	-100
chr19	38876359	+	Exon	NM_152657	1.9607e-19	-100
chr20	62037661	-	Exon	NM_004518,NM_172106,NM_172107,NM_172108	2.55333e-19	-100
chr8	70310634	-	-	-	5.22241e-19	-100
chr18	55308713	-	Intron	NM_001242804	8.40788e-19	-100
chr17	65014374	+	Exon	NM_014405	1.06986e-17	-100
chr19	14045081	-	Exon	NM_001146254,NM_024825	1.7219e-16	-100
chr19	16148832	-	Intron	NR_024335,NR_024336	1.29104e-15	-100
chr11	119372912	+	-	-	1.4876e-15	-100
chr1	32787564	-	Intron	NM_004964	1.97981e-14	-100
chr9	139404477	+	Intron	NM_017617	1.9141e-13	-100
chr1	1368696	+	-	-	2.8607e-13	-100
chr9	137115465	-	-	-	9.63721e-13	-100
chr16	1209524	-	Intron	NM_001005407,NM_021098	1.15312e-12	-100
chr5	140768831	+	Exon	NM_003736	3.14266e-12	-100
chr22	45016904	+	Intron	NR_044991	2.02037e-11	-100
chr22	17339005	-	-	-	2.21647e-11	-100
chr14	101147465	+	-	-	4.88663e-09	-100
chr4	41789556	-	-	-	6.95693e-09	-100
chr17	58090744	+	-	-	1.79485e-08	-100
chrX	73102250	-	-	-	1.26033e-07	-100
chr8	10071768	+	Intron	NM_001135671,NM_001199729,NM_012331	2.86347e-07	-100
chr8	135464838	-	-	-	1.5787e-06	-100
chr6	168629567	-	-	-	3.64911e-06	-100
chrX	11129656	+	Promoter	NM_001122608,NM_001171991,NM_005333	6.27871e-06	-100
chrX	11129685	+	Promoter	NM_001122608,NM_001171991,NM_005333	6.27871e-06	-100
chr17	3827976	+	Exon	NM_005173,NM_174953,NM_174954,NM_174955,NM_174956	1.25233e-05	-100
chr8	144810707	-	Exon	NM_198488	1.82625e-05	-100
chr5	1702632	+	-	-	5.15147e-05	-100
chr11	65389738	+	Exon	NM_032223	7.01359e-05	-100
chr17	69060813	+	-	-	0.000232669	-100
chr1	40072431	-	-	-	0.00172895	-100
chr8	119512564	-	Intron	NM_001101676,NM_207506	0.00300504	-100
chr7	101899451	-	Intron	NM_001202544,NM_001202545,NM_001202546,NM_001913,NM_181500	5.48422e-10	-99.8695
chr1	10927994	+	-	-	9.28253e-66	-99.8656
chrX	65440953	-	Intron	NM_001130860,NM_014799,NM_138737	1.15327e-15	-99.8503
chr2	121580769	-	Intron	NM_005270	1.92474e-21	-99.8047
chr9	132213368	+	-	-	5.33655e-11	-99.7475
chr8	139893219	+	Intron	NM_152888	2.58835e-07	-99.7475
chr12	63027064	+	-	-	1.74133e-08	-99.7423
chr16	57514245	-	Intron	NM_018110	1.87588e-09	-99.7222
chr9	137252901	-	Intron	NM_002957	5.10067e-42	-99.5908
chr8	111214988	-	-	-	6.76778e-08	-99.5902
chr14	39839688	-	-	-	7.70533e-16	-99.5763
chr17	76338448	-	-	-	2.01745e-13	-99.5763
chr8	111214882	-	-	-	6.76778e-08	-99.5726
chr1	229999456	+	-	-	2.6125e-32	-99.4444
chr8	432286	+	-	-	9.99929e-40	-99.4373
chr20	44365635	-	-	-	6.8264e-07	-99.4083
chr8	529383	+	-	-	1.60983e-27	-99.375
chr12	77958175	-	-	-	1.37262e-20	-99.3711
chr5	1056406	-	Intron	NM_006598	2.38475e-10	-99.3534
chr1	53549571	+	Intron	NM_001199080,NM_001199081,NM_001199082,NM_153703	4.73161e-46	-99.3151
chr9	137327595	-	-	-	4.33395e-15	-99.2568
chr19	18979730	-	Exon	NM_001492,NM_021267	2.98639e-20	-99.2366
chr17	17875493	-	Promoter	NM_001033551,NM_001082968	3.64491e-30	-99.2147
chr17	1395610	-	Promoter	NM_001080779	4.05764e-11	-99.2063
chr21	37914512	+	Promoter	NM_001146078	7.857e-11	-99.1921
chr5	140167730	+	Exon	NM_018900	3.6709e-40	-99.1868
chr9	23720051	+	Intron	NM_001171195,NM_001171197,NM_004432	2.94978e-22	-99.1721
chr9	140357917	-	Exon	NM_001098537,NM_152286	5.86195e-16	-99.1667
chr19	18888396	+	Exon	NM_001098482,NM_015321	3.25094e-14	-99.1667
chr9	128561678	+	Intron	NR_024122,NR_024123	3.16618e-33	-99.1525
chr12	121491040	-	-	-	4.93481e-10	-99.1525
chr19	4217893	+	Exon	NM_133475	1.63486e-07	-99.1437
chr19	38876307	+	Exon	NM_152657	1.19651e-20	-99.1379
chr22	49877366	-	-	-	1.65487e-53	-99.115
chrX	71441188	-	Intron	NM_017669	2.40537e-29	-99.1124
chr2	240167713	+	Intron	NM_006037	1.79076e-33	-99.1035
chr16	54098689	+	Intron	NM_001080432	1.98957e-16	-99.0567
chr2	136632706	+	Intron	NM_005915	1.62151e-35	-99
chr7	129721455	-	Intron	NM_014997	8.59914e-07	-98.9908
chr19	2430458	-	Exon	NM_032737	6.80261e-50	-98.9749
chr21	43396867	+	-	-	4.18967e-08	-98.9583
chr20	60901937	-	-	-	2.13041e-09	-98.8152
chr21	46861549	-	Intron	NM_130445	5.65738e-06	-98.7903
chr22	47117635	-	Intron	NM_022766	4.77829e-11	-98.7597
chr3	47745490	-	Intron	NM_003074	0.000121507	-98.6842
chrX	46655190	+	-	-	1.2315e-53	-98.6364
chr6	4074210	-	Intron	NM_173563	2.88778e-22	-98.5981
chr19	51239211	+	-	-	1.03914e-13	-98.5818
chr7	57518423	-	Intron	NM_001159279	3.13577e-27	-98.3648
chr10	107462810	-	-	-	3.25814e-28	-98.3475
chrX	152938959	-	Promoter	NM_001039582	6.28873e-20	-98.3333
chr16	28564845	+	Promoter	NM_138414	1.29883e-19	-98.3333
chr19	49890993	+	Promoter	NM_144688	4.23037e-31	-98.2759
chrX	73542965	+	-	-	7.18395e-42	-98.2405
chr20	55236076	-	-	-	1.40941e-07	-98.2256
chr15	72600819	+	Intron	NM_001172684,NM_052840	1.91862e-07	-98.2143
chr8	47570573	-	-	-	2.62448e-34	-98.2116
chr17	17465070	-	Intron	NM_001267551,NM_001267552,NM_007169,NM_148172,NM_148173	4.86023e-22	-98.1981
chr19	4344106	-	Promoter	NM_001159846,NM_032868	1.82763e-41	-98.1916
chr8	111214968	-	-	-	6.76778e-08	-98.1752
chrX	70587441	+	Intron	NR_001568	5.14705e-59	-98.1481
chr8	111214949	-	-	-	6.76778e-08	-98.1481
chr2	237980833	-	-	-	5.0629e-14	-97.8151
chr9	139232458	-	Intron	NM_001145638,NM_015597	3.64356e-06	-97.7941
chr5	639351	+	Intron	NM_018140	5.82485e-32	-97.6744
chr19	1112701	-	Intron	NM_001100122,NM_014963	4.90217e-24	-97.5048
chr6	170761534	+	-	-	1.61661e-14	-97.5024
chr15	99106681	-	-	-	0.00217268	-97.479
chr2	79219598	-	-	-	1.20427e-21	-97.4679
chr17	42357383	-	-	-	1.1205e-08	-97.4635
chr9	131217975	-	Promoter	NM_001242352,NM_001242353,NM_001242354,NM_002540,NM_153432,NM_153435,NM_153439	8.16434e-50	-97.4611
chr5	83834765	+	-	-	3.87935e-10	-97.4265
chr20	43941036	-	-	-	4.17777e-37	-97.3684
chr10	105157364	+	Promoter	NM_014976	8.19229e-32	-97.3521
chr22	47686096	-	-	-	1.47255e-07	-97.2222
chr15	65135682	-	Intron	NM_025201	3.10724e-48	-97.1429
chr15	66558966	+	-	-	1.3379e-07	-97.1311
chrX	102242159	-	-	-	3.67715e-40	-96.9803
chr19	40729158	-	Exon	NM_024877	3.46488e-10	-96.9565
chr19	40729163	-	Exon	NM_024877	3.46488e-10	-96.9565
chr1	156844604	-	-	-	1.37489e-30	-96.8964
chr15	41061480	-	Promoter	NM_001130448	3.68229e-05	-96.8182
chr7	72764810	+	Intron	NM_001135211,NM_003602	3.01263e-15	-96.8098
chr7	75465798	+	-	-	5.13326e-11	-96.7668
chr12	17497564	-	-	-	4.84305e-26	-96.7478
chr22	50015719	-	Intron	NR_026997	6.89414e-05	-96.7107
chr11	94278765	-	Exon	NM_002033	1.18895e-08	-96.7105
chr14	92852015	+	Intron	NM_153646,NM_153647,NM_153648	1.03659e-05	-96.5643
chr1	3493919	-	Intron	NM_001409	2.89243e-05	-96.5507
chr11	94278750	-	Exon	NM_002033	1.31149e-08	-96.545
chr7	963161	-	Intron	NM_006869	5.1886e-13	-96.4628
chr22	38177060	-	-	-	4.9166e-15	-96.3889
chr20	60882705	-	Exon	NM_007002,NM_175573	1.32873e-31	-96.1722
chr19	40729229	-	Intron	NM_024877	3.46488e-10	-96.1435
chr6	37447806	-	-	-	1.83606e-16	-96.1026
chr10	126329427	+	Intron	NM_014661	1.1446e-35	-96.0938
chr5	176904332	+	-	-	3.83773e-11	-96.0386
chr1	7395456	-	Intron	NM_015215	1.50488e-06	-95.995
chr3	113385730	+	Intron	NM_001009899	5.28024e-22	-95.8882
chr3	109050993	-	-	-	8.0403e-18	-95.8866
chr1	16534569	-	Exon	NM_153213	0.00309181	-95.8333
chr6	141883858	-	-	-	3.01255e-10	-95.7954
chr17	1645375	-	Promoter	NM_000934,NM_001165921	2.74336e-09	-95.7386
chr16	31439191	+	Promoter	NM_005205	1.1617e-25	-95.5157
chr12	130875568	-	-	-	6.68474e-21	-95.5027
chr3	122842747	-	-	-	9.13217e-09	-95.4464
chr11	119372665	-	-	-	2.10684e-18	-95.4236
chr22	45277203	-	-	-	2.41326e-09	-95.3743
chr7	96739433	+	-	-	3.63214e-09	-95.2731
chr19	10941605	-	Intron	NM_001190716	3.15029e-13	-95.2706
chr17	36666607	+	Exon	NM_001199417	9.84627e-12	-95.1754
chr17	36666639	+	Exon	NM_001199417	9.84627e-12	-95.1754
chr6	167837737	-	-	-	9.53573e-13	-95.1613
chr7	29602599	-	Promoter	NM_175887	1.10564e-17	-95.0659
chr15	57847092	-	-	-	7.26126e-27	-95.0302
chr10	3239580	+	-	-	2.81489e-21	-95.0097
chr6	151718366	+	-	-	0.000659909	-95
chr19	40729155	-	Exon	NM_024877	1.37089e-08	-94.9565
chr7	1363994	-	-	-	3.74118e-60	-94.7489
chr12	117580996	-	-	-	6.32314e-14	-94.6686
chr17	934743	+	Promoter	NM_001256847	5.5128e-12	-94.6429
chrX	101914857	-	Intron	NM_001199818	2.71599e-12	-94.623
chr7	159023828	-	-	-	7.75075e-16	-94.6212
chr17	3767634	-	Intron	NM_032294,NM_172206	1.44722e-14	-94.6154
chr7	28529215	-	Intron	NM_182899	6.73164e-23	-94.5527
chr5	166851231	-	Intron	NM_001122679	1.51533e-90	-94.5302
chr19	6308302	+	Intron	NM_133492	3.89839e-12	-94.5268
chr18	33786625	+	Intron	NM_017947	2.67245e-09	-94.4758
chr16	87855469	-	-	-	1.52483e-22	-94.4684
chr8	111214996	-	-	-	1.14802e-06	-94.4588
chr5	140186835	+	Exon	NM_018907	2.18285e-13	-94.4444
chr20	57089654	+	Promoter	NM_153360	9.14446e-12	-94.3693
chr20	57089578	+	Promoter	NM_153360	1.5842e-12	-94.1704
chr20	57089580	+	Promoter	NM_153360	1.5842e-12	-94.1704
chr20	57089657	+	Promoter	NM_153360	1.5842e-12	-94.1704
chr12	4920436	+	Exon	NM_002235	3.91006e-19	-94.14
chr20	57089601	+	Promoter	NM_153360	1.66761e-12	-94.0909
chr6	151644411	+	Intron	NM_005100	0.000122088	-94.0789
chr20	57089603	+	Promoter	NM_153360	1.82278e-12	-94.0639
chr13	20876214	-	-	-	7.86918e-30	-94.0564
chr17	934780	+	Promoter	NM_001256847	4.76448e-11	-94.0404
chrX	51361471	+	-	-	3.76394e-37	-94.0329
chr15	53088451	+	-	-	1.94771e-46	-93.9902
chr7	100258378	+	-	-	0.00440831	-93.9394
chr9	35080852	+	Promoter	NM_004629	3.15874e-21	-93.9286
chr17	42357518	-	-	-	9.44325e-06	-93.7657
chr8	99959935	-	Intron	NM_001142462,NM_053001	8.26108e-18	-93.75
chrX	20185131	+	Intron	NM_004586	8.78142e-11	-93.692
chr8	26773664	-	-	-	7.23909e-24	-93.64
chr20	57089673	+	Promoter	NM_153360	3.55898e-11	-93.5446
chr17	5404561	-	Promoter	NM_001162371	4.86316e-14	-93.515
chr17	5404564	-	Promoter	NM_001162371	4.86316e-14	-93.515
chr2	148946759	-	Intron	NM_018328	5.87083e-23	-93.3852
chr17	77751222	+	Promoter	NM_005189,NM_032647	2.00221e-20	-93.3118
chrX	39615407	-	-	-	2.00056e-30	-93.2432
chr12	34494350	+	-	-	3.04746e-19	-93.1944
chr19	13260083	-	Intron	NM_001271611	1.54236e-11	-93.1765
chr8	145814263	-	Intron	NM_025251	5.43253e-23	-93.1034
chrX	33785304	+	-	-	4.4878e-20	-93.1034
chrX	30262377	+	-	-	5.55986e-22	-93.0492
chr17	77751089	+	Promoter	NM_005189,NM_032647	4.26988e-23	-93.0457
chr19	15202565	+	-	-	4.39284e-20	-92.9711
chr4	2965527	-	Exon	NM_001004056,NM_001004057,NM_182982	9.08052e-45	-92.9449
chrX	39615393	-	-	-	2.00056e-30	-92.8701
chr9	84169414	+	-	-	1.564e-36	-92.8685
chr11	130030912	-	Intron	NM_021978	3.02886e-06	-92.8299
chr5	179626588	-	Intron	NM_175062	1.91621e-22	-92.8238
chr9	94885254	+	-	-	9.59512e-08	-92.7632
chrX	73102290	-	-	-	6.53245e-11	-92.7575
chr17	77751110	+	Promoter	NM_005189,NM_032647	4.6673e-23	-92.7236
chr7	108235954	-	-	-	0.000623774	-92.6144
chr3	47745535	-	Intron	NM_003074	3.78156e-11	-92.5578
chr19	30941202	-	Intron	NM_014717	6.651e-25	-92.3762
chr16	66989427	-	-	-	0.00345443	-92.3669
chr17	5404582	-	Promoter	NM_001162371	4.1125e-16	-92.1443
chr17	5404526	-	Promoter	NM_001162371	7.82637e-16	-92.1387
chr17	2466543	-	-	-	2.11025e-30	-92.1313
chr1	12227794	+	Promoter	NM_001066	3.01853e-11	-91.989
chr12	112966323	+	-	-	2.10432e-36	-91.958
chr17	5404509	-	Promoter	NM_001162371	7.40193e-16	-91.9474
chr17	5404514	-	Promoter	NM_001162371	7.40193e-16	-91.9474
chr17	5404580	-	Promoter	NM_001162371	7.40193e-16	-91.9474
chr17	5404587	-	Promoter	NM_001162371	7.40193e-16	-91.9474
chr17	36988637	-	-	-	2.43098e-28	-91.946
chr17	5404500	-	Promoter	NM_001162371	7.40193e-16	-91.9362
chr17	5404602	-	Promoter	NM_001162371	7.40193e-16	-91.9249
chr16	5069308	-	-	-	8.12616e-15	-91.8815
chr2	132243534	-	Intron	NR_046946	3.76072e-22	-91.8561
chr2	121101714	+	-	-	2.13768e-08	-91.8532
chr9	140704062	+	Intron	NM_024757	6.81604e-10	-91.8367
chrX	16763783	+	Intron	NM_032796,NR_033181	0.00204342	-91.8182
chr20	15475902	-	-	-	2.80031e-38	-91.8054
chr5	151150351	+	-	-	0.00051144	-91.7412
chr20	60930447	+	Intron	NM_005560	4.32558e-18	-91.7011
chr11	76492210	-	-	-	3.32424e-06	-91.623
chr6	21342905	-	-	-	2.88587e-06	-91.6092
chr14	104613034	+	Intron	NM_015656	3.3723e-07	-91.602
chr6	137113920	+	Promoter	NM_005923	8.89947e-05	-91.5751
chr6	137113830	+	Promoter	NM_005923	2.00716e-05	-91.5535
chr20	18428059	-	Intron	NM_001099407	2.84009e-09	-91.4286
chr3	47745540	-	Intron	NM_003074	1.54522e-10	-91.4024
chr6	137113909	+	Promoter	NM_005923	2.15286e-05	-91.3919
chr1	113628927	-	Intron	NM_014813	1.20119e-31	-91.3793
chr6	137113837	+	Promoter	NM_005923	2.35198e-05	-91.2546
chr2	237033584	-	Exon	NM_001037131,NM_014914	9.08028e-11	-91.1894
chr17	49247596	-	-	-	1.69816e-08	-91.1765
chr16	71587763	-	-	-	0.00043078	-91.1765
chr5	72661606	-	-	-	2.20185e-46	-91.1664
chr7	71098442	+	Intron	NM_022479	1.47632e-97	-91.1628
chr5	151150233	+	-	-	0.000666707	-91.1607
chr8	13049617	-	Intron	NM_182643	5.52063e-21	-91.1425
chrX	151465466	-	Intron	NM_000808	4.05566e-10	-91.1152
chr12	98910869	-	Promoter	NR_027157	1.79858e-52	-91.0923
chr8	41761409	-	-	-	4.30242e-38	-91.0826
chr1	7395503	-	Intron	NM_015215	1.44414e-06	-91.0212
chr9	137574877	-	Intron	NM_000093	7.73744e-50	-90.9438
chr10	133531637	+	-	-	2.89283e-26	-90.9091
chr4	159593529	-	Exon	NM_004453	2.56664e-05	-90.8019
chr4	159593549	-	Exon	NM_004453	2.56664e-05	-90.8019
chr4	159593552	-	Exon	NM_004453	2.56664e-05	-90.8019
chr1	212051009	+	-	-	4.18842e-09	-90.7888
chr19	30941327	-	Intron	NM_014717	8.95704e-26	-90.7691
chr4	159593655	-	Promoter	NM_001008393	2.63593e-05	-90.7583
chr4	159593659	-	Promoter	NM_001008393	2.63593e-05	-90.7583
chr16	87229650	+	-	-	3.82019e-19	-90.7371
chr10	134405440	-	Intron	NM_005539	0.00211056	-90.7253
chr3	47745584	-	Intron	NM_003074	2.66699e-14	-90.6989
chr9	114323019	+	Intron	NM_001146109	1.75374e-09	-90.6977
chr1	156860922	+	-	-	1.45481e-13	-90.6259
chr20	57089587	+	Promoter	NM_153360	2.4881e-11	-90.6129
chr1	161575856	-	Promoter	NR_024151	2.45568e-15	-90.6077
chr4	159593545	-	Exon	NM_004453	2.93395e-05	-90.566
chr17	1670302	+	Intron	NM_002615	8.41483e-25	-90.5067
chr7	138637067	-	Intron	NM_001164665,NM_020910	3.37006e-17	-90.388
chr2	240167703	+	Intron	NM_006037	5.62555e-35	-90.3636
chr19	8116317	-	-	-	2.84154e-05	-90.3461
chr4	159593554	-	Exon	NM_004453	2.63593e-05	-90.3273
chr8	145814104	-	Intron	NM_025251	5.91142e-21	-90.3257
chr5	151150248	+	-	-	0.000987337	-90.3001
chr5	151150311	+	-	-	0.000987337	-90.3001
chr5	151150313	+	-	-	0.000987337	-90.3001
chr6	109159590	+	-	-	4.30823e-15	-90.2968
chr19	6310374	+	Intron	NM_133492	7.43976e-55	-90.2844
chr5	177669245	-	Intron	NM_173465	6.93139e-29	-90.2597
chr19	45953423	-	-	-	6.65241e-13	-90.2506
chr20	58181393	-	Intron	NM_080672	4.93606e-06	-90.2448
chr12	125002705	+	Intron	NM_001077261,NM_001206654,NM_006312	1.45384e-20	-90.2421
chr8	145728587	+	Promoter	NM_005309	1.46137e-19	-90.2319
chr5	178688494	+	Intron	NM_014244,NM_021599	1.3605e-17	-90.2174
chr10	130493329	+	-	-	1.19952e-20	-90.158
chr5	151150340	+	-	-	0.00106154	-90.1215
chr22	36783749	-	Promoter	NM_002473	4.5723e-26	-90.062
chr15	52581909	-	Intron	NM_018728	2.64387e-26	-90.027
chr7	109310808	+	-	-	0.000498282	-90
chr4	159593520	-	Exon	NM_004453	2.56664e-05	-89.9544
chr4	159593527	-	Exon	NM_004453	2.56664e-05	-89.9544
chr10	99293167	-	Intron	NM_024954	1.19633e-18	-89.8523
chr16	70821001	-	Intron	NM_018052	3.67685e-23	-89.8228
chr16	51752798	-	-	-	1.13101e-09	-89.8158
chr12	133148251	-	Intron	NM_001142641	2.21962e-06	-89.801
chr19	34218481	-	Intron	NM_001127895,NM_001127896,NM_022467	1.32573e-27	-89.7959
chrX	136511315	+	-	-	2.70976e-35	-89.7895
chr5	151150229	+	-	-	0.000987337	-89.7846
chr6	109159606	+	-	-	4.30823e-15	-89.7474
chr11	118986835	-	Exon	NM_014807	1.65427e-17	-89.7243
chr22	48206646	-	-	-	2.50971e-13	-89.7059
chr17	7759080	+	Exon	NM_203411	1.00136e-25	-89.7037
chrX	70529691	-	Intron	NR_001568	1.37199e-12	-89.6552
chr12	53483507	-	-	-	1.28334e-21	-89.6403
chr7	1787169	-	Exon	NM_001128636	4.72863e-15	-89.6363
chr17	62008713	-	Promoter	NM_000626,NM_001039933,NM_021602	3.53776e-40	-89.5298
chr20	56247312	-	Intron	NM_199171	3.6786e-07	-89.4958
chr20	56247316	-	Intron	NM_199171	3.6786e-07	-89.4958
chr14	81036749	+	Intron	NM_152446	7.36803e-08	-89.4793
chr12	38531241	-	-	-	5.93865e-31	-89.4375
chr16	88969729	-	Intron	NM_175931	1.20235e-11	-89.4231
chr20	56247303	-	Intron	NM_199171	3.78419e-07	-89.2857
chr9	99482543	-	-	-	1.665e-05	-89.2488
chr19	33355834	-	Intron	NM_001126335,NM_001243036,NM_014270	4.57563e-28	-89.1662
chr14	100039634	-	Intron	NM_001144995	3.18865e-07	-89.0909
chr5	159373431	+	Intron	NM_000679	2.0732e-17	-89.0724
chr9	67273418	+	Intron	NR_002817	1.15941e-51	-89.0693
chr1	38513428	+	Promoter	NM_002699	1.4019e-63	-89.0588
chr5	68716051	-	Exon	NM_001038603,NM_001244734	3.4037e-29	-89.014
chr11	71149933	+	Exon	NM_001163817,NM_001360	7.35389e-20	-88.8889
chr6	15222504	+	-	-	1.95633e-10	-88.875
chr19	55694866	+	Intron	NM_001161440,NM_002842	2.06168e-41	-88.7352
chr9	130452163	-	Promoter	NR_037473	4.57688e-16	-88.7097
chr9	130452255	-	Promoter	NR_037473	1.6464e-16	-88.7028
chr15	101459373	-	Promoter	NM_024652	6.91084e-08	-88.6119
chr2	128411228	-	Intron	NM_001136037,NM_001161403,NM_001161404,NM_017980	1.11605e-22	-88.5666
chr19	3825677	-	Intron	NM_015174	4.40602e-30	-88.5293
chr7	45163400	-	-	-	1.1566e-36	-88.5171
chr1	3371717	+	Promoter	NM_014448	5.76085e-14	-88.4816
chrX	47714223	-	Intron	NM_007137	2.17825e-12	-88.4801
chr5	3592643	+	-	-	1.34575e-26	-88.4365
chr15	99106770	-	-	-	0.00165432	-88.4091
chr10	88570888	+	Intron	NM_004329	4.15669e-10	-88.3705
chr5	77143982	-	-	-	1.92194e-51	-88.3673
chr19	55694829	+	Intron	NM_001161440,NM_002842	2.06168e-41	-88.3399
chr20	49473794	-	Intron	NM_198799	9.53907e-28	-88.3291
chr3	155711896	+	-	-	8.02049e-68	-88.3055
chr19	36817281	-	Intron	NR_038279	0.000200669	-88.3035
chr1	249093701	+	-	-	2.79291e-13	-88.2812
chr10	63941162	+	-	-	7.72659e-09	-88.1589
chr9	68409214	-	-	-	9.86811e-27	-88.1378
chr14	92727390	-	-	-	5.86983e-20	-88.0952
chr19	38468106	-	Intron	NM_015073	0.000193106	-88.0447
chr7	128550428	+	Promoter	NM_001135914,NM_199349	2.3985e-07	-88.0023
chr19	38621286	-	-	-	1.32137e-35	-87.8892
chr20	3766344	+	Exon	NM_001810	6.65738e-40	-87.8788
chr11	130325811	-	-	-	2.85269e-06	-87.7339
chr6	27303430	+	-	-	2.13546e-08	-87.6314
chr22	26848953	-	Exon	NM_022081,NM_152841,NR_073135,NR_073136	2.73484e-07	-87.619
chr10	54068463	-	Intron	NR_038277	3.1828e-34	-87.5611
chr7	45439195	-	-	-	3.63452e-13	-87.5431
chr5	2741006	+	-	-	2.64478e-17	-87.5314
chr3	11048991	-	Intron	NM_003042	1.87863e-08	-87.5
chr10	80921855	-	-	-	0.000152499	-87.5
chr12	133000206	+	-	-	3.75795e-12	-87.4582
chr12	133000216	+	-	-	3.75795e-12	-87.4582
chr11	1861691	-	Promoter	NM_001145829	1.02847e-08	-87.4576
chr4	886017	-	Intron	NM_005255	0.00412631	-87.4214
chr14	103059119	-	Exon	NM_015156	1.1181e-46	-87.4161
chr16	58090098	+	-	-	0.000120162	-87.3684
chr1	2119615	+	Intron	NR_046425,NR_046426	9.87028e-11	-87.3387
chr5	151150226	+	-	-	0.000925996	-87.3306
chr19	37329795	+	Promoter	NM_001242802	2.97858e-84	-87.3152
chr10	81966847	-	Promoter	NR_038464	6.72746e-52	-87.3099
chr17	79067058	+	Intron	NM_001144888,NM_006340,NM_017450,NM_017451	1.53144e-16	-87.3098
chr15	101459509	-	Exon	NM_024652	1.91598e-10	-87.2078
chr15	101459381	-	Promoter	NM_024652	1.91598e-10	-87.2078
chr13	99009050	-	-	-	7.11988e-33	-87.1901
chr15	101459544	-	Exon	NM_024652	2.07078e-10	-87.1555
chr17	32404367	-	Intron	NM_001094	1.43048e-20	-87.1521
chr5	148678959	+	Intron	NM_001146337,NM_152406	5.36624e-23	-87.1007
chr13	25491117	-	Intron	NM_018451,NR_047594,NR_047595	3.68701e-08	-87.037
chr19	4329382	-	Intron	NM_001013841,NM_017720	7.16501e-33	-86.9976
chrX	101914777	-	Intron	NM_001199818	1.39746e-10	-86.9166
chr15	101459505	-	Exon	NM_024652	2.77248e-10	-86.9084
chr15	101459534	-	Exon	NM_024652	2.77248e-10	-86.9084
chr15	101459397	-	Promoter	NM_024652	2.77248e-10	-86.9084
chr15	101459404	-	Promoter	NM_024652	2.77248e-10	-86.9084
chr19	4885097	+	-	-	4.60248e-47	-86.8697
chr15	101459391	-	Promoter	NM_024652	2.99643e-10	-86.8543
chr15	101459422	-	Promoter	NM_024652	2.99643e-10	-86.8543
chr19	10410256	-	-	-	2.99042e-37	-86.8323
chr15	101459496	-	Exon	NM_024652	3.24136e-10	-86.7995
chr1	243418365	-	Exon	NM_001042404,NM_001042405,NM_014812	1.81853e-14	-86.7701
chr11	120098887	-	-	-	2.76305e-17	-86.7647
chr20	32450590	+	-	-	9.20833e-42	-86.7441
chr16	14718764	+	Intron	NM_001134477,NM_001242992,NM_002582	2.87081e-33	-86.6897
chr15	85132259	+	-	-	1.52251e-05	-86.6718
chr20	32450644	+	-	-	9.20833e-42	-86.6119
chr14	104011604	+	-	-	4.2994e-07	-86.5854
chr6	100905640	-	Intron	NM_005068	0.000175607	-86.5772
chr19	9930109	+	Promoter	NM_017703	9.48866e-05	-86.5675
chr9	134150804	-	Intron	NM_033387	2.09425e-15	-86.5134
chrX	139014813	-	-	-	1.37569e-25	-86.4821
chr1	178927878	+	-	-	3.60296e-26	-86.4686
chr19	9930158	+	Promoter	NM_017703	6.7816e-05	-86.4205
chr3	49832797	+	Exon	NM_001007540	2.49912e-12	-86.3615
chr5	108106762	-	-	-	1.24886e-17	-86.3475
chr19	58730195	-	-	-	2.96152e-05	-86.3465
chr4	152330774	+	Promoter	NM_001109977	3.48055e-33	-86.334
chrX	153991039	-	Exon	NM_001142463,NM_001363	5.1029e-16	-86.3309
chr1	55353091	-	Promoter	NM_014762	2.09728e-63	-86.33
chrX	153991052	-	Exon	NM_001142463,NM_001363	5.1029e-16	-86.2054
chr2	231779048	+	Intron	NM_005683	4.69256e-44	-86.0299
chr13	22089516	+	Intron	NM_152726	2.55188e-05	-86.0128
chr5	2391228	+	-	-	2.43912e-17	-86
chrX	153991059	-	Exon	NM_001142463,NM_001363	5.1029e-16	-85.9821
chrX	153991063	-	Exon	NM_001142463,NM_001363	5.1029e-16	-85.9821
chr15	90233453	+	Promoter	NM_001271572,NM_001271573,NM_003847	6.2243e-27	-85.9812
chr1	50884457	-	Exon	NM_032110	1.25716e-11	-85.8521
chr17	7308222	+	Promoter	NM_152766,NR_037719	6.72916e-05	-85.822
chr7	151078674	+	Exon	NM_198285	9.49342e-12	-85.8078
chr22	49297922	+	-	-	6.01805e-16	-85.7564
chr15	101459385	-	Promoter	NM_024652	2.07078e-10	-85.7269
chrX	73102255	-	-	-	3.81574e-05	-85.7143
chrX	73102279	-	-	-	3.81574e-05	-85.7143
chr15	101459513	-	Exon	NM_024652	5.64725e-10	-85.6246
chrX	10821766	-	Intron	NM_033290	7.78446e-06	-85.616
chr5	113658960	-	-	-	1.75095e-31	-85.5834
chr4	3076210	-	Exon	NR_045414	2.43024e-15	-85.5558
chr12	113592277	+	Exon	NM_001144872	3.451e-23	-85.4878
chr15	101459395	-	Promoter	NM_024652	2.77248e-10	-85.4798
chr1	107683189	+	Promoter	NM_001113226,NM_001113228	2.51675e-10	-85.452
chr9	132200890	-	-	-	1.64035e-42	-85.3801
chr18	10454234	+	Promoter	NM_153000	0.000111202	-85.3535
chr13	39433637	+	Exon	NM_207361	1.49638e-13	-85.3333
chr12	113592268	+	Exon	NM_001144872	1.04109e-22	-85.2993
chr12	113592328	+	Exon	NM_001144872	1.04109e-22	-85.2993
chr12	113592350	+	Exon	NM_001144872	1.04109e-22	-85.2993
chr1	107683084	+	Promoter	NM_001113226,NM_001113228	9.46052e-10	-85.2268
chr1	107683112	+	Promoter	NM_001113226,NM_001113228	3.23149e-10	-85.2123
chr9	135106863	-	Intron	NM_032536	3.45791e-23	-85.1992
chr8	56758437	-	-	-	3.34872e-06	-85.1625
chr19	10410364	-	-	-	1.80905e-34	-85.1379
chr12	113592244	+	Exon	NM_001144872	1.04109e-22	-85.1275
chr12	113592251	+	Exon	NM_001144872	1.04109e-22	-85.1275
chr12	113592254	+	Exon	NM_001144872	1.04109e-22	-85.1275
chr12	113592319	+	Exon	NM_001144872	1.04109e-22	-85.1275
chr12	113592322	+	Exon	NM_001144872	1.04109e-22	-85.1275
chr12	113592324	+	Exon	NM_001144872	1.04109e-22	-85.1275
chr12	113592345	+	Exon	NM_001144872	1.04109e-22	-85.1275
chr19	31844920	+	-	-	1.33088e-41	-85.0747
chr17	39775593	-	-	-	5.98882e-06	-85.0427
chr6	13548621	+	-	-	0.000497241	-85
chr16	133497	+	Intron	NM_001015052,NM_001015054,NM_002434	0.00070891	-84.9905
chr12	113592330	+	Exon	NM_001144872	1.04109e-22	-84.9556
chr9	133892721	+	Intron	NM_006059	1.22777e-23	-84.9311
chr1	107683087	+	Promoter	NM_001113226,NM_001113228	3.23149e-10	-84.9309
chr14	74783633	+	-	-	1.85723e-14	-84.9085
chr15	65135710	-	Intron	NM_025201	1.55079e-28	-84.8954
chr1	156860935	+	-	-	1.45498e-13	-84.8887
chr1	107683187	+	Promoter	NM_001113226,NM_001113228	3.23149e-10	-84.882
chr19	9930012	+	Promoter	NM_017703	1.08079e-05	-84.8222
chr19	9930015	+	Promoter	NM_017703	1.08079e-05	-84.8222
chr19	9930028	+	Promoter	NM_017703	1.08079e-05	-84.8222
chr19	9930041	+	Promoter	NM_017703	1.08079e-05	-84.8222
chr19	9930129	+	Promoter	NM_017703	1.08079e-05	-84.8222
chr19	9930145	+	Promoter	NM_017703	1.08079e-05	-84.8222
chr1	67599976	+	-	-	1.01375e-16	-84.7826
chr7	128550410	+	Promoter	NM_001135914,NM_199349	1.22641e-08	-84.7817
chr1	156860966	+	-	-	2.2807e-11	-84.7772
chr9	116779236	+	Intron	NM_133374	5.75985e-52	-84.7738
chr2	206790779	+	-	-	2.57302e-16	-84.7474
chr17	73200895	-	Promoter	NM_024844	5.28863e-24	-84.7458
chr1	10927982	+	-	-	9.89887e-28	-84.7345
chr19	9930054	+	Promoter	NM_017703	1.11389e-05	-84.726
chr1	109698002	-	Intron	NR_049773	1.53369e-33	-84.6964
chr14	100680776	-	-	-	2.15906e-25	-84.6944
chr22	18620117	+	-	-	4.29916e-08	-84.6884
chr1	107683071	+	Promoter	NM_001113226,NM_001113228	3.23149e-10	-84.6351
chrX	27786834	+	-	-	4.745e-06	-84.6154
chr12	113592274	+	Exon	NM_001144872	1.04109e-22	-84.612
chrX	51361383	+	-	-	1.67017e-42	-84.5674
chrX	106520467	-	-	-	2.22528e-25	-84.5482
chr7	128550422	+	Promoter	NM_001135914,NM_199349	1.22641e-08	-84.5085
chr7	128550425	+	Promoter	NM_001135914,NM_199349	1.22641e-08	-84.5085
chr17	72350672	+	Exon	NM_153209	2.37804e-44	-84.4388
chrX	154299250	+	Exon	NM_001018024,NM_001018025	2.6148e-57	-84.4115
chr17	34820208	-	-	-	9.41263e-16	-84.3861
chr7	128550340	+	Promoter	NM_001135914,NM_199349	1.33092e-08	-84.3778
chr8	144102990	+	Exon	NM_001127213,NM_002346	4.5751e-24	-84.3434
chr9	137251280	-	Intron	NM_002957	5.14388e-16	-84.3364
chr3	69248279	+	Intron	NM_015123	0.00249706	-84.3157
chr8	142342917	+	-	-	4.56641e-16	-84.3111
chr19	22034646	+	Promoter	NM_001256648,NM_001256649,NM_001256650,NM_001256651,NM_001256653	0.000612701	-84.2972
chr11	69958195	+	Intron	NM_018043,NR_030691	5.60002e-16	-84.2857
chr17	61564631	-	-	-	6.95133e-06	-84.2623
chr3	197517520	+	Promoter	NM_032773	1.38128e-05	-84.2522
chr21	46876549	-	Intron	NM_130445	1.93717e-14	-84.2414
chr18	65183870	+	Exon	NM_032160	2.53772e-43	-84.2185
chr20	5092785	+	Promoter	NM_001009923,NM_001009924,NM_001009925,NM_014145	4.86849e-35	-84.2023
chr16	29118891	+	Intron	NR_003369	1.5724e-16	-84.2
chrX	73756310	+	-	-	3.64412e-09	-84.1981
chr1	38400637	+	Intron	NM_005540	1.36375e-05	-84.1827
chr22	40060150	-	-	-	1.60016e-17	-84.1534
chr17	77246318	-	Intron	NM_001082575	2.19691e-33	-84.1194
chr20	2730722	-	Intron	NM_001110514	3.18464e-26	-84.0984
chr2	220371214	-	-	-	0.000464949	-84.0952
chr8	49513137	-	-	-	0.00315889	-84.0883
chr19	3818370	+	Intron	NM_015174	3.33666e-31	-84.0849
chr2	99798874	+	Intron	NM_145212,NR_028356	0.000545887	-84.0805
chr3	194888048	-	Intron	NM_152531	9.61702e-13	-84.0793
chr22	40060085	-	-	-	1.94852e-17	-84.0473
chr6	28317836	+	Exon	NM_001242894,NM_001242895,NM_024493	6.71513e-13	-84.0404
chr1	107683064	+	Promoter	NM_001113226,NM_001113228	3.23149e-10	-84.0363
chr2	205010613	+	-	-	7.06322e-23	-84.0264
chr20	47466824	+	-	-	3.74897e-25	-84.0206
chr9	19049653	-	Exon	NM_006570	3.38025e-13	-83.9566
chr9	19049742	-	Exon	NM_006570	3.38025e-13	-83.9566
chr9	19049760	-	Exon	NM_006570	3.38025e-13	-83.9566
chr20	62283992	+	Promoter	NM_015894	2.16797e-05	-83.9458
chr17	76338494	-	-	-	2.01745e-13	-83.9437
chr11	82443779	+	Exon	NM_175885	3.05204e-16	-83.9286
chr19	33884683	-	Intron	NM_000285,NM_001166056,NM_001166057	0.00116157	-83.9091
chr9	139101674	+	Intron	NM_181701	1.33131e-42	-83.849
chr19	9930005	+	Promoter	NM_017703	9.69717e-06	-83.8432
chr9	137251212	-	Intron	NM_002957	5.14388e-16	-83.8385
chr12	113592246	+	Exon	NM_001144872	1.04109e-22	-83.7841
chr13	114841809	+	Intron	NM_007368	4.11569e-27	-83.75
chr17	38769200	-	-	-	3.36591e-25	-83.7361
chrX	40196605	-	-	-	0.00414227	-83.7045
chr22	41922981	-	Exon	NM_001018050,NM_001018052,NM_138338	2.10788e-08	-83.6957
chr17	1636946	-	Exon	NM_001163673,NM_001163809,NM_001163811,NM_152348	2.71098e-06	-83.6865
chr19	36239199	-	Promoter	NM_019104	1.99803e-16	-83.6617
chr7	99156713	-	Promoter	NM_001009958,NM_001009960,NM_001085367,NM_001085368	1.91347e-17	-83.6401
chr19	58281265	-	Promoter	NM_001077426,NM_001204814,NM_017652	8.23557e-05	-83.6305
chr20	52439222	+	-	-	2.50456e-05	-83.6277
chr19	30865001	+	Intron	NM_014717	3.6838e-29	-83.5793
chr8	146043069	+	-	-	2.43994e-16	-83.5722
chr19	58571099	+	Promoter	NM_001164527,NM_001164529,NM_001164530,NM_003436,NM_007134	1.98477e-12	-83.5455
chr17	73200903	-	Promoter	NM_024844	3.53253e-28	-83.5393
chr9	19049732	-	Exon	NM_006570	3.38025e-13	-83.5328
chr2	39389168	+	-	-	1.03533e-05	-83.5308
chr13	106912912	+	-	-	5.0574e-10	-83.499
chr20	25457149	-	Exon	NM_025176	2.27478e-16	-83.448
chr2	133596061	+	Intron	NM_207363,NM_207481	5.7963e-21	-83.3833
chr6	167266094	-	Intron	NM_001006932	4.04786e-05	-83.3772
chr7	99156623	-	Exon	NM_001009958,NM_001009960,NM_001085367,NM_001085368	3.22518e-17	-83.3624
chr8	119633491	-	Promoter	NM_001101676,NM_207506	4.72608e-10	-83.3543
chr7	99156619	-	Exon	NM_001009958,NM_001009960,NM_001085367,NM_001085368	3.22518e-17	-83.3516
chr7	99156635	-	Exon	NM_001009958,NM_001009960,NM_001085367,NM_001085368	3.22518e-17	-83.3516
chr12	113592232	+	Exon	NM_001144872	8.05384e-21	-83.3418
chrX	47497307	-	Exon	NM_001114123,NM_005229	2.99546e-13	-83.3333
chr18	10454241	+	Promoter	NM_153000	3.59038e-05	-83.3333
chr18	47585037	+	Intron	NM_001080467	7.86115e-06	-83.2912
chr7	1850309	+	-	-	1.06764e-11	-83.2898
chr19	3507867	+	Intron	NM_016263	2.01114e-53	-83.277
chr9	137251189	-	Intron	NM_002957	1.4882e-12	-83.2684
chr12	113592263	+	Exon	NM_001144872	8.05384e-21	-83.2657
chr17	77093629	-	Intron	NM_001082575	0.000254283	-83.2552
chr19	34397758	+	-	-	5.87508e-18	-83.2215
chr18	65183966	+	Exon	NM_032160	3.36069e-36	-83.2141
chr14	104011594	+	-	-	6.73665e-05	-83.1795
chr7	153749539	-	Promoter	NM_130797	1.47888e-06	-83.1699
chr4	83644087	-	Intron	NM_001037582,NM_024906	2.22522e-24	-83.1171
chr19	6443344	-	Intron	NM_024103	2.49214e-06	-83.1004
chr9	19049767	-	Exon	NM_006570	3.38025e-13	-83.0945
chrX	46655383	+	-	-	6.16028e-09	-83.0851
chr18	65183938	+	Exon	NM_032160	2.01246e-44	-83.0834
chr18	65183940	+	Exon	NM_032160	2.01246e-44	-83.0834
chr7	3762273	-	Intron	NM_152744	9.13835e-12	-83
chr13	108520322	+	Promoter	NM_001080396	5.34375e-55	-82.9868
chr8	70310661	-	-	-	1.94938e-14	-82.9659
chr7	71919910	-	-	-	7.58465e-05	-82.9634
chr11	116661212	-	Exon	NM_001166598,NM_052968	1.63322e-09	-82.9468
chr16	55513076	+	Promoter	NM_004530	3.59641e-13	-82.9272
chr9	19049758	-	Exon	NM_006570	7.62191e-13	-82.8999
chr1	3690452	+	Intron	NM_001163724	1.2487e-51	-82.8582
chr9	126160604	-	Intron	NM_020946	1.52773e-61	-82.8524
chr18	65183874	+	Exon	NM_032160	1.53445e-43	-82.8431
chr5	178772201	-	Exon	NM_014244,NM_021599	2.24445e-28	-82.8358
chr8	144827145	-	Exon	NR_033849	8.67146e-13	-82.8242
chr8	135509244	+	Intron	NM_001174158	1.427e-18	-82.8125
chrX	24095289	-	Exon	NM_001415	7.24295e-22	-82.7869
chr18	65183848	+	Exon	NM_032160	8.57809e-44	-82.7786
chr18	65183926	+	Exon	NM_032160	8.57809e-44	-82.7786
chr1	1958198	+	Intron	NM_000815	0.00100906	-82.7731
chr2	47891725	+	-	-	1.37795e-24	-82.7706
chr8	20250427	-	-	-	5.66191e-33	-82.7685
chr1	16375684	+	Exon	NM_001165945	1.57537e-15	-82.7586
chr22	23267476	+	-	-	1.82073e-06	-82.7473
chr17	79881066	+	Promoter	NM_032711	2.27285e-17	-82.7382
chr18	65183868	+	Exon	NM_032160	2.40682e-43	-82.7343
chr1	3083833	+	Intron	NM_022114,NM_199454	4.26953e-32	-82.6923
chr12	131521056	-	Intron	NM_198827	1.98705e-30	-82.686
chr16	85685196	+	Intron	NM_001134473,NM_014615	2.01018e-12	-82.672
chr22	29999969	+	Exon	NM_000268,NM_016418,NM_181825,NM_181828,NM_181829,NM_181830,NM_181831,NM_181832,NM_181833	3.80795e-08	-82.6446
chr2	121614135	+	Intron	NM_005270	9.50282e-15	-82.6433
chr4	133880033	+	-	-	7.18059e-10	-82.598
chr15	35346107	-	-	-	3.76106e-18	-82.5922
chr17	72785750	+	Intron	NM_017728	2.23626e-05	-82.5805
chr10	98155597	+	-	-	1.37856e-23	-82.5733
chr12	51467994	-	Intron	NM_030809,NR_045072	9.4179e-16	-82.5487
chr16	29118982	+	Intron	NR_003369	1.5724e-16	-82.5397
chr14	74319089	+	Promoter	NM_001146154	6.01932e-09	-82.5366
chr17	73602069	-	-	-	1.79829e-15	-82.5063
chr7	111201738	-	Promoter	NM_001244606	5.23881e-13	-82.495
chr16	84898125	+	Intron	NM_031476	2.76689e-08	-82.4592
chr19	14073699	-	-	-	4.69014e-10	-82.4438
chr15	64856243	+	Intron	NM_015042	1.60084e-10	-82.377
chr11	133135632	+	Intron	NM_001012393	1.9057e-10	-82.3529
chr3	11421382	-	Intron	NM_001144912,NM_006395	1.06282e-54	-82.3412
chr8	38089646	-	Exon	NM_001164232	3.18904e-06	-82.256
chr7	3762257	-	Intron	NM_152744	2.28515e-11	-82.25
chr7	128550300	+	Promoter	NM_001135914,NM_199349	1.15945e-08	-82.2426
chr16	33962697	+	Promoter	NR_038368	4.45601e-09	-82.2351
chr19	50962347	+	Intron	NM_004533	2.63576e-08	-82.2222
chr1	1120697	-	Exon	NM_153254	2.01867e-16	-82.1606
chrX	153285073	-	Promoter	NM_001025242,NM_001025243,NM_001569	6.27125e-27	-82.1398
chr18	65183826	+	Exon	NM_032160	2.88908e-40	-82.1031
chr4	8789166	-	-	-	2.84297e-28	-82.0896
chr7	100076544	+	Exon	NM_030935	2.36366e-11	-82.0816
chr12	132918756	+	-	-	1.26962e-28	-82.0794
chr18	43754998	-	Intron	NM_001008239,NM_145055	2.41791e-07	-82.0671
chr22	38966567	+	Promoter	NM_007068	6.95986e-14	-81.9887
chr18	65183935	+	Exon	NM_032160	2.73066e-40	-81.9601
chr14	91731272	+	-	-	3.1887e-24	-81.9544
chrX	100911707	-	Exon	NM_014782,NM_177949	1.51311e-23	-81.9437
chr17	79973829	+	Intron	NM_024083,NR_045351	8.90904e-12	-81.9351
chr10	24541982	+	Intron	NM_001098500,NM_001098501,NM_019590	1.91005e-08	-81.9293
chr10	61666480	-	Promoter	NM_005436	4.52597e-15	-81.9113
chr7	117865262	+	Promoter	NM_019644	5.77847e-09	-81.9048
chr8	38089648	-	Exon	NM_001164232	4.26235e-06	-81.8937
chrX	153285076	-	Promoter	NM_001025242,NM_001025243,NM_001569	6.27125e-27	-81.8648
chr16	88528044	+	Intron	NM_153813	1.76532e-10	-81.8549
chr7	99156710	-	Promoter	NM_001009958,NM_001009960,NM_001085367,NM_001085368	1.6758e-15	-81.8472
chr15	65588762	+	-	-	5.67143e-32	-81.8448
chr21	44201633	+	-	-	4.58864e-33	-81.8207
chr19	4091169	+	Intron	NM_030662	0.00266242	-81.7949
chr1	110003337	+	-	-	9.81801e-06	-81.7698
chr4	83458433	+	Intron	NM_001080506	3.35063e-06	-81.7614
chr10	90957699	+	-	-	3.13649e-31	-81.7569
chr22	38315185	-	Exon	NM_033386	1.02898e-05	-81.6874
chr22	29999960	+	Exon	NM_000268,NM_016418,NM_181825,NM_181828,NM_181829,NM_181830,NM_181831,NM_181832,NM_181833	1.52403e-13	-81.626
chr14	100705608	+	Exon	NM_003403	1.08965e-42	-81.6182
chr2	235766932	-	-	-	2.40523e-08	-81.5985
chr9	135240280	+	-	-	0.0026337	-81.5897
chr19	47349395	+	-	-	1.73127e-06	-81.5681
chr1	63788382	+	Promoter	NM_012183	3.50831e-11	-81.5414
chrX	84230960	-	-	-	4.44086e-13	-81.5387
chr6	134338917	-	Intron	NM_145176	2.65685e-08	-81.5113
chr10	130493481	+	-	-	4.6974e-18	-81.4778
chr10	61666527	-	Promoter	NM_005436	4.46755e-14	-81.4455
chr17	78643103	-	Intron	NM_001163034,NM_020761	7.41359e-06	-81.4381
chr10	61666525	-	Promoter	NM_005436	5.96872e-14	-81.4172
chr12	33592195	-	Promoter	NM_198992	3.0703e-19	-81.4169
chr1	228348050	-	-	-	6.27301e-28	-81.3953
chr11	72260006	+	-	-	3.35781e-25	-81.3921
chr11	62311677	-	Intron	NM_001620,NM_024060	2.8095e-30	-81.3671
chr16	2932157	+	-	-	1.11733e-18	-81.3429
chr15	40391213	+	Intron	NM_001003943	1.50072e-09	-81.315
chr7	3084041	-	Promoter	NM_032415	5.88467e-22	-81.283
chr19	19811201	+	-	-	2.891e-06	-81.2813
chr8	47566047	-	-	-	4.66564e-10	-81.2657
chr18	65183853	+	Exon	NM_032160	6.77357e-44	-81.2643
chr16	33039714	+	-	-	6.90515e-23	-81.2044
chr19	36239211	-	Promoter	NM_019104	1.21493e-16	-81.1563
chr20	5092741	+	Promoter	NM_001009923,NM_001009924,NM_001009925,NM_014145	1.18632e-24	-81.1531
chr19	10402720	+	Exon	NM_003259	0.00035302	-81.1502
chr9	138679720	-	Intron	NM_020822	1.18538e-17	-81.1489
chr4	1277561	-	-	-	3.09195e-36	-81.1443
chr7	99156616	-	Exon	NM_001009958,NM_001009960,NM_001085367,NM_001085368	1.05988e-11	-81.1298
chr3	11210248	-	Intron	NM_001098213	1.54269e-07	-81.1201
chr14	100705551	+	Exon	NM_003403	3.46514e-43	-81.1178
chr1	20691955	-	Intron	NR_033887	5.05704e-22	-81.1111
chr19	50962295	+	Intron	NM_004533	4.00841e-08	-81.1111
chr16	66976709	-	-	-	8.61673e-06	-81.0735
chr13	73153553	-	-	-	1.31479e-05	-81.0606
chr14	100705554	+	Exon	NM_003403	4.70064e-43	-81.0552
chr16	69796318	+	Promoter	NM_001270454,NM_001270455,NM_007014	2.27906e-06	-81.054
chr16	88797805	-	Intron	NM_001142864	2.00316e-12	-81.0345
chr16	88797764	-	Intron	NM_001142864	2.44706e-12	-81.0345
chr19	36239244	-	Promoter	NM_019104	2.02884e-16	-81.0333
chrX	129243878	+	Promoter	NM_001127197	3.17431e-18	-81.0103
chr10	125751983	+	-	-	5.43561e-40	-80.9823
chr12	27677278	+	Exon	NM_001198915,NM_001198916,NM_003622,NM_177444	1.34326e-06	-80.9715
chr14	100705556	+	Exon	NM_003403	1.07301e-42	-80.9694
chrX	25031033	-	Intron	NM_139058	1.62674e-21	-80.9628
chr8	28929237	-	Exon	NM_015254	1.61437e-34	-80.9609
chr7	35295198	+	-	-	4.15315e-39	-80.9529
chr4	1277542	-	-	-	6.42532e-34	-80.9505
chr18	65183830	+	Exon	NM_032160	2.34191e-42	-80.9313
chr2	177082625	-	-	-	4.68467e-06	-80.914
chr8	38089610	-	Exon	NM_001164232	4.26235e-06	-80.9095
chr8	38089633	-	Exon	NM_001164232	4.26235e-06	-80.9095
chr8	38089696	-	Promoter	NM_001164232	4.26235e-06	-80.9095
chr11	67206339	-	Exon	NM_001018070,NM_020441	3.26479e-27	-80.8989
chr14	100705531	+	Exon	NM_003403	1.08965e-42	-80.8554
chr14	100705537	+	Exon	NM_003403	1.08965e-42	-80.8554
chr14	100705593	+	Exon	NM_003403	1.08965e-42	-80.8554
chr14	100705613	+	Exon	NM_003403	1.08965e-42	-80.8554
chr12	52445420	+	Promoter	NM_002135,NM_173157	2.61693e-22	-80.8333
chr10	61666487	-	Promoter	NM_005436	7.3525e-14	-80.8291
chr10	61666494	-	Promoter	NM_005436	7.3525e-14	-80.8291
chr10	61666497	-	Promoter	NM_005436	7.3525e-14	-80.8291
chr10	61666514	-	Promoter	NM_005436	7.3525e-14	-80.8291
chr10	61666633	-	Promoter	NM_005436	7.3525e-14	-80.8291
chr4	820585	-	Promoter	NM_006651	1.29902e-06	-80.8094
chr7	26904391	-	Promoter	NM_003930	0.00162007	-80.7769
chr10	61666611	-	Promoter	NM_005436	7.3525e-14	-80.7588
chr14	100705589	+	Exon	NM_003403	5.76437e-42	-80.7316
chrX	25031014	-	Intron	NM_139058	4.03751e-21	-80.7263
chr19	36239246	-	Promoter	NM_019104	1.94763e-16	-80.6982
chr22	25730741	+	-	-	9.63467e-42	-80.6891
chr19	36239237	-	Promoter	NM_019104	2.02884e-16	-80.6853
chr1	11714327	-	Promoter	NM_001014765,NM_033182,NM_183413	5.2571e-07	-80.667
chr12	132895544	-	Intron	NM_001122636	1.57763e-28	-80.6661
chr11	118955763	+	Exon	NM_000190,NM_001258208	3.85918e-31	-80.659
chrX	25031031	-	Intron	NM_139058	3.34207e-21	-80.6473
chr9	36937647	-	Intron	NM_016734	7.60492e-09	-80.6329
chr19	36239248	-	Promoter	NM_019104	2.24414e-16	-80.6039
chr7	73861955	+	-	-	3.84813e-15	-80.5946
chr14	100705617	+	Exon	NM_003403	1.048e-41	-80.5866
chr6	25280212	-	Promoter	NM_001173977,NM_017640	3.38563e-19	-80.5812
chr10	61666637	-	Promoter	NM_005436	7.3525e-14	-80.566
chr10	61666491	-	Promoter	NM_005436	9.70778e-14	-80.5646
chr14	100705622	+	Exon	NM_003403	1.0286e-41	-80.5524
chr1	11714316	-	Promoter	NM_001014765,NM_033182,NM_183413	5.09823e-07	-80.5327
chr6	42067416	-	-	-	1.29538e-16	-80.5143
chr7	75544763	+	Promoter	NM_000941	0.000850862	-80.4903
chr12	96794106	-	Exon	NM_001170464,NM_002595	1.19993e-06	-80.4899
chr12	96794121	-	Exon	NM_001170464,NM_002595	1.19993e-06	-80.4899
chr12	96794123	-	Exon	NM_001170464,NM_002595	1.19993e-06	-80.4899
chr12	96794141	-	Exon	NM_001170464,NM_002595	1.19993e-06	-80.4899
chr12	96794221	-	Exon	NM_001170464,NM_002595	1.19993e-06	-80.4899
chr12	96794227	-	Exon	NM_001170464,NM_002595	1.19993e-06	-80.4899
chr1	11714386	-	Exon	NM_012168	5.59356e-07	-80.4803
chr11	118955772	+	Exon	NM_000190,NM_001258208	5.17641e-31	-80.4773
chr1	11714417	-	Exon	NM_012168	5.09823e-07	-80.4627
chr5	121567825	+	-	-	4.57315e-10	-80.4533
chr7	101504331	-	Intron	NM_181552	3.8566e-30	-80.4348
chr9	126779183	+	Intron	NM_004789	1.50468e-17	-80.4335
chr12	108919947	-	-	-	8.90215e-20	-80.4167
chr19	45421930	-	Intron	NM_001645	1.19102e-16	-80.4058
chr1	11714324	-	Promoter	NM_001014765,NM_033182,NM_183413	5.09823e-07	-80.3849
chr12	96794134	-	Exon	NM_001170464,NM_002595	2.01559e-06	-80.3688
chr1	237699871	+	Intron	NM_001035	8.74788e-06	-80.3613
chr1	41350259	+	-	-	8.36092e-10	-80.3571
chr11	118955755	+	Exon	NM_000190,NM_001258208	3.85918e-31	-80.3423
chr4	105584410	+	-	-	3.27773e-21	-80.3279
chrX	128594393	-	Intron	NM_003069,NM_139035	9.53705e-19	-80.3279
chr11	60720123	+	Promoter	NM_016582,NR_027391	2.99736e-09	-80.3197
chr10	61666510	-	Promoter	NM_005436	5.53446e-14	-80.3069
chr19	19742654	-	Intron	NM_016573	1.10532e-05	-80.2846
chr8	142892309	+	-	-	1.00747e-28	-80.2819
chr19	5828360	-	-	-	1.03333e-30	-80.2738
chr1	11714399	-	Exon	NM_012168	5.42217e-07	-80.2662
chr12	96794102	-	Exon	NM_001170464,NM_002595	1.19993e-06	-80.2552
chr12	96794131	-	Exon	NM_001170464,NM_002595	1.19993e-06	-80.2552
chr12	96794139	-	Exon	NM_001170464,NM_002595	1.19993e-06	-80.2552
chr12	96794207	-	Exon	NM_001170464,NM_002595	1.19993e-06	-80.2552
chr14	100705519	+	Exon	NM_003403	1.0286e-41	-80.2548
chr1	11714404	-	Exon	NM_012168	5.09823e-07	-80.2385
chr1	11714411	-	Exon	NM_012168	5.09823e-07	-80.2385
chr19	36239209	-	Promoter	NM_019104	2.23308e-16	-80.2367
chr22	46374837	-	-	-	9.69761e-53	-80.226
chr14	100705545	+	Exon	NM_003403	2.09024e-42	-80.2177
chr12	108004065	-	-	-	1.41578e-21	-80.2149
chr11	118955708	+	Exon	NM_000190,NM_001258208	1.89312e-31	-80.2142
chr14	100705523	+	Exon	NM_003403	2.09024e-42	-80.1842
chr22	29549188	+	Intron	NM_032045	0.0014169	-80.1626
chr19	5828291	-	Exon	NM_004558	1.10114e-25	-80.1384
chr12	96794204	-	Exon	NM_001170464,NM_002595	1.19993e-06	-80.1195
chr22	43507099	+	Promoter	NM_001197	4.71292e-08	-80.1158
chr1	25565651	-	-	-	2.17604e-37	-80.1118
chr17	7759002	+	Exon	NM_203411	2.14823e-08	-80.0883
chrX	77140415	+	Intron	NM_032121	3.22234e-20	-80.0748
chr19	45475793	-	Intron	NM_001294,NR_040006,NR_040007	0.00012382	-80.0668
chr5	157001577	-	Intron	NM_033274	5.07447e-26	-80.0263
chr7	26904428	-	Promoter	NM_003930	0.000312061	-80.0227
chr7	26904441	-	Promoter	NM_003930	0.000312061	-80.0227
chr7	26904456	-	Promoter	NM_003930	0.000312061	-80.0227
chr7	26904471	-	Promoter	NM_003930	0.000312061	-80.0227
chr1	11714291	-	Promoter	NM_001014765,NM_033182,NM_183413	5.09823e-07	-80.0143
chr22	45600814	+	Intron	NM_001009880,NM_015264	2.57669e-12	-80
chr19	21546769	+	-	-	0.000395024	-80
chr8	143600664	+	Intron	NM_001702	3.9272e-06	-79.9846
chr9	126779293	+	Intron	NM_004789	2.11777e-17	-79.9672
chr14	100705527	+	Exon	NM_003403	1.0286e-41	-79.9571
chr7	71098519	+	Intron	NM_022479	5.84351e-61	-79.9537
chr9	130452288	-	Promoter	NR_037473	2.53574e-09	-79.9266
chr22	17604884	+	-	-	3.92955e-18	-79.9162
chr16	3406454	+	Exon	NM_012368	6.9101e-14	-79.9021
chr4	3591973	-	Exon	NR_040045	1.81798e-58	-79.8986
chr3	58173757	+	-	-	4.72051e-16	-79.8947
chr7	66952251	-	-	-	2.78971e-19	-79.8886
chr1	32581908	+	Intron	NM_012316	1.31395e-16	-79.8822
chr22	29999883	+	Exon	NM_000268,NM_016418,NM_181825,NM_181828,NM_181829,NM_181830,NM_181831,NM_181832,NM_181833	6.57369e-12	-79.8747
chr11	118955775	+	Exon	NM_000190,NM_001258208	9.56688e-30	-79.8645
chr11	45168294	-	Promoter	NM_001256695,NM_001256696	0.00310134	-79.8555
chr4	820580	-	Promoter	NM_006651	2.52944e-06	-79.8326
chr4	820666	-	Promoter	NM_006651	2.52944e-06	-79.8326
chr3	72924766	+	-	-	0.00240292	-79.7872
chr6	104109304	-	-	-	3.71739e-05	-79.7619
chr5	68454646	+	-	-	3.39696e-27	-79.7579
chr1	11714320	-	Promoter	NM_001014765,NM_033182,NM_183413	5.09823e-07	-79.7515
chr8	101661856	+	Exon	NM_152628	2.23988e-36	-79.7415
chr14	100705631	+	Exon	NM_003403	1.02775e-34	-79.7189
chr1	3291178	+	Intron	NM_022114,NM_199454	5.33102e-14	-79.6875
chr1	11714301	-	Promoter	NM_001014765,NM_033182,NM_183413	5.09823e-07	-79.6814
chr19	5828371	-	-	-	4.28015e-30	-79.6721
chr19	5828385	-	-	-	4.28015e-30	-79.6721
chr19	5828300	-	Exon	NM_004558	4.28015e-30	-79.6721
chr19	5828334	-	Exon	NM_004558	4.28015e-30	-79.6721
chr12	96794213	-	Exon	NM_001170464,NM_002595	2.01559e-06	-79.6705
chr14	100705511	+	Exon	NM_003403	1.08965e-42	-79.6649
chr5	72661460	-	-	-	2.95595e-23	-79.6291
chrX	118369896	-	Promoter	NM_006667	7.24003e-31	-79.6241
chr9	126779285	+	Intron	NM_004789	4.15557e-17	-79.6126
chr1	110920746	+	Intron	NM_001201549	0.000657564	-79.5985
chr7	71098505	+	Intron	NM_022479	5.00451e-56	-79.588
chr16	56681870	+	-	-	1.45124e-59	-79.576
chr17	74810276	-	-	-	3.58554e-24	-79.5424
chr19	10402672	+	Intron	NM_003259	9.45954e-05	-79.5409
chr6	379416	+	-	-	3.66792e-24	-79.4948
chr8	125951149	+	-	-	0.00279916	-79.4581
chr1	11714415	-	Exon	NM_012168	5.09823e-07	-79.4572
chr8	8699597	+	Intron	NM_004225	6.95476e-08	-79.4425
chr12	96794189	-	Exon	NM_001170464,NM_002595	1.25013e-06	-79.4391
chr8	11452975	-	-	-	1.94332e-17	-79.4391
chr4	820558	-	Promoter	NM_006651	3.25165e-06	-79.4331
chr4	820570	-	Promoter	NM_006651	3.25165e-06	-79.4331
chr4	820573	-	Promoter	NM_006651	3.25165e-06	-79.4331
chr4	820577	-	Promoter	NM_006651	3.25165e-06	-79.4331
chr4	820655	-	Promoter	NM_006651	3.25165e-06	-79.4331
chr4	820680	-	Promoter	NM_006651	3.25165e-06	-79.4331
chr4	820687	-	Promoter	NM_006651	3.25165e-06	-79.4331
chr4	644572	+	Intron	NM_000283,NM_001145291	3.54249e-32	-79.4329
chr22	30311659	+	Intron	NM_021090,NM_153050,NM_153051	3.03295e-06	-79.4148
chr19	18722185	-	-	-	5.98355e-25	-79.4111
chr3	25494864	-	Intron	NM_016152	9.94213e-17	-79.4068
chr2	220041912	+	Promoter	NM_015680	1.41607e-09	-79.3881
chr12	55429924	+	-	-	0.000100144	-79.3848
chrX	49164933	-	Intron	NM_001098413	7.89992e-07	-79.3501
chr4	174338030	+	-	-	0.000571318	-79.3482
chr2	10952582	-	Promoter	NM_005742	4.16562e-07	-79.3088
chr11	118955737	+	Exon	NM_000190,NM_001258208	1.43777e-29	-79.2946
chr19	5828369	-	-	-	4.28015e-30	-79.2784
chr19	5828382	-	-	-	4.28015e-30	-79.2784
chr19	5828388	-	-	-	4.28015e-30	-79.2784
chr19	5828302	-	Exon	NM_004558	4.28015e-30	-79.2784
chr19	10402701	+	Intron	NM_003259	3.14955e-05	-79.2529
chr1	11714430	-	Exon	NM_012168	5.09823e-07	-79.233
chr1	151597204	-	Intron	NM_030918	1.55551e-19	-79.2177
chr22	43507110	+	Promoter	NM_001197	6.89953e-09	-79.2144
chr5	159343934	-	Promoter	NM_000679	1.49187e-12	-79.2129
chr8	144524180	-	Intron	NM_015117	6.91622e-22	-79.1814
chr22	47679562	-	-	-	1.10256e-12	-79.1667
chr9	44882493	+	-	-	9.21038e-09	-79.1667
chr22	43507035	+	Promoter	NM_001197	6.89953e-09	-79.1523
chr22	43507141	+	Promoter	NM_001197	6.89953e-09	-79.1521
chr3	57604891	+	-	-	0.000334634	-79.1508
chr22	43507015	+	Promoter	NM_001197	6.11262e-09	-79.1434
chr22	43507102	+	Promoter	NM_001197	2.57649e-08	-79.1091
chr15	45491094	+	Exon	NM_138356	2.23868e-27	-79.1073
chr14	103058977	-	Promoter	NM_015156	2.77452e-17	-79.0828
chrX	136135180	-	-	-	1.2831e-06	-79.0724
chr22	25703030	-	-	-	9.02586e-07	-79.0697
chr9	126779296	+	Intron	NM_004789	7.99185e-16	-79.0446
chr5	121289818	+	-	-	3.54707e-11	-79.0441
chr22	43507046	+	Promoter	NM_001197	6.48504e-09	-79.0441
chr5	140186942	+	Exon	NM_018907	1.52673e-05	-79.0239
chr5	140186954	+	Exon	NM_018907	1.52673e-05	-79.0239
chr7	124321051	+	-	-	7.86652e-05	-79
chr8	38089615	-	Exon	NM_001164232	4.26236e-06	-78.9865
chr2	43004163	+	Intron	NM_012205	6.31341e-15	-78.9853
chr1	166766353	-	-	-	3.91735e-06	-78.9773
chr16	54098725	+	Intron	NM_001080432	1.98957e-16	-78.9745
chr3	10170810	-	-	-	1.41059e-10	-78.9437
chr2	10952564	-	Promoter	NM_005742	5.23211e-07	-78.9377
chr2	10952573	-	Promoter	NM_005742	5.23211e-07	-78.9377
chr2	10952604	-	Promoter	NM_005742	5.23211e-07	-78.9377
chr2	10952608	-	Promoter	NM_005742	5.23211e-07	-78.9377
chr2	10952612	-	Promoter	NM_005742	5.23211e-07	-78.9377
chr2	10952621	-	Promoter	NM_005742	5.23211e-07	-78.9377
chr2	10952623	-	Promoter	NM_005742	5.23211e-07	-78.9377
chr2	10952629	-	Promoter	NM_005742	5.23211e-07	-78.9377
chr2	10952637	-	Promoter	NM_005742	5.23211e-07	-78.9377
chr8	28929231	-	Exon	NM_015254	1.14147e-27	-78.9342
chr12	123700555	+	Intron	NM_022782	0.00355176	-78.9286
chrX	118369888	-	Promoter	NM_006667	3.62755e-31	-78.9267
chr15	26118643	-	-	-	8.15543e-08	-78.923
chr22	43507022	+	Promoter	NM_001197	6.89953e-09	-78.9189
chr22	43507037	+	Promoter	NM_001197	6.89953e-09	-78.9187
chr17	3859632	+	Intron	NM_005173,NM_174953,NM_174954,NM_174955,NM_174956,NM_174957,NM_174958	1.85989e-10	-78.9163
chr14	86220487	-	-	-	8.4008e-05	-78.916
chr11	76760928	+	-	-	2.41546e-18	-78.913
chr22	43507026	+	Promoter	NM_001197	7.10583e-09	-78.8909
chr22	43507124	+	Promoter	NM_001197	7.10583e-09	-78.8909
chr14	100705507	+	Exon	NM_003403	7.46961e-41	-78.8657
chrX	139014914	-	-	-	3.31738e-15	-78.8628
chr2	97598533	+	Intron	NM_001122646	1.91369e-10	-78.8518
chr6	137113816	+	Promoter	NM_005923	0.00224457	-78.8495
chr17	71272409	-	-	-	1.42053e-06	-78.8462
chr5	74618413	+	-	-	9.22022e-20	-78.8315
chr22	43507118	+	Promoter	NM_001197	6.11262e-09	-78.8296
chr22	43507018	+	Promoter	NM_001197	6.2957e-09	-78.8242
chr1	100598444	-	Exon	NM_194292	5.35609e-10	-78.8183
chr5	140186916	+	Exon	NM_018907	1.59493e-05	-78.8018
chr1	26208330	-	-	-	2.05313e-27	-78.7895
chr13	113426045	-	Intron	NM_015205,NM_032189	2.30808e-22	-78.783
chr5	140186918	+	Exon	NM_018907	1.61037e-05	-78.7685
chr7	1146371	+	Intron	NM_001134395,NM_001134396,NM_032350	1.07254e-41	-78.756
chr22	38966705	+	Promoter	NM_007068	8.67915e-12	-78.7553
chr3	122746068	-	Promoter	NM_001031702,NM_001256348	1.39601e-34	-78.7193
chr2	74719138	+	-	-	2.81748e-20	-78.7061
chr8	134769560	-	-	-	5.8262e-07	-78.6988
chr5	286155	+	Intron	NM_001267557	4.88657e-41	-78.6926
chr14	74319111	+	Promoter	NM_001146154	1.77314e-07	-78.6905
chr19	3792851	-	Intron	NM_002378	2.25554e-18	-78.6863
chr22	38966585	+	Promoter	NM_007068	7.1873e-12	-78.6852
chr16	87636344	-	Promoter	NM_001271604,NM_001271605,NM_020655	0.0035326	-78.6733
chr1	161283812	+	Promoter	NM_001035511,NM_001035512,NM_001035513,NM_003001	6.28429e-31	-78.664
chr17	26263199	+	-	-	9.53685e-06	-78.6574
chr22	49877388	-	-	-	4.29488e-15	-78.6219
chr22	43507121	+	Promoter	NM_001197	6.89953e-09	-78.6051
chr12	122517342	-	Promoter	NM_014938	2.11393e-09	-78.5888
chr12	10095941	+	-	-	1.90865e-08	-78.588
chr1	24127802	+	Promoter	NM_000403	3.48602e-39	-78.5731
chr22	38966663	+	Promoter	NM_007068	1.99645e-11	-78.5714
chr1	203456507	+	Exon	NM_002725,NM_201348	2.08831e-19	-78.5714
chr14	59009702	+	Intron	NM_001244190,NM_001244191,NM_001244192,NM_014749	1.612e-08	-78.5632
chr6	3726080	+	Intron	NM_183373	1.6641e-42	-78.5631
chrX	49007112	+	-	-	5.67795e-22	-78.56
chr11	416030	-	Intron	NM_021805	1.00453e-16	-78.5526
chr11	4415203	+	Promoter	NM_003141	3.61582e-11	-78.5133
chr7	75544732	+	Promoter	NM_000941	0.00152806	-78.5014
chr17	7751363	-	Exon	NM_001080424	6.98907e-22	-78.4954
chr1	3522541	-	Intron	NM_001409	2.08843e-10	-78.495
chr17	11145386	-	Promoter	NM_001173461,NM_001173462,NM_207386	3.63982e-31	-78.4891
chr5	69053490	-	-	-	0.00545523	-78.4868
chr10	134692260	+	Intron	NM_001200049	4.80108e-31	-78.4608
chr7	75159454	-	-	-	2.02019e-52	-78.4563
chr14	21945769	-	Promoter	NM_001163380	1.77185e-05	-78.4546
chr22	49877375	-	-	-	1.04166e-14	-78.4452
chr12	96794192	-	Exon	NM_001170464,NM_002595	1.19993e-06	-78.4102
chr22	38966665	+	Promoter	NM_007068	1.99645e-11	-78.3929
chr22	38966699	+	Promoter	NM_007068	1.99645e-11	-78.3929
chr21	44503104	+	-	-	5.1776e-14	-78.3871
chr14	21945699	-	Exon	NM_014828	2.01402e-05	-78.3612
chr5	140186956	+	Exon	NM_018907	1.52673e-05	-78.3572
chr7	75544717	+	Promoter	NM_000941	0.00183245	-78.3447
chr7	75544720	+	Promoter	NM_000941	0.00183245	-78.3447
chr19	51871516	-	Promoter	NM_152353	1.46791e-33	-78.3374
chr7	6438327	-	Exon	NM_018890	1.75412e-17	-78.2924
chr4	2537993	-	-	-	4.73973e-43	-78.2875
chr17	78221999	+	-	-	2.23473e-08	-78.2677
chr6	169567768	-	-	-	2.6452e-23	-78.2609
chr1	32054836	+	-	-	2.70731e-06	-78.2609
chrX	47377475	+	-	-	6.02735e-09	-78.2282
chr19	42905258	+	Intron	NR_073180	7.1518e-19	-78.2277
chr11	118955695	+	Exon	NM_000190,NM_001258208	1.56716e-27	-78.2242
chrX	118369876	-	Promoter	NM_006667	4.37252e-25	-78.2219
chrX	11147195	-	-	-	2.33496e-05	-78.2143
chr2	10952588	-	Promoter	NM_005742	5.23211e-07	-78.1914
chrX	73102319	-	-	-	1.82984e-06	-78.125
chr6	166697286	-	-	-	0.00010338	-78.1171
chr12	74409330	+	-	-	1.21847e-10	-78.1153
chr20	34173020	-	-	-	1.24747e-35	-78.0835
chr14	103059006	-	Exon	NM_015156	1.98062e-20	-78.0769
chr19	10402611	+	Intron	NM_003259	3.14955e-05	-78.0658
chr7	75544687	+	Promoter	NM_000941	0.00183245	-78.0596
chr14	21945806	-	Promoter	NM_001163380	1.97973e-05	-78.0496
chr14	21945799	-	Promoter	NM_001163380	2.28147e-05	-78.013
chr6	157695630	-	-	-	0.000297835	-78.0007
chr14	21945684	-	Exon	NM_014828	2.12629e-05	-77.9932
chr22	38966612	+	Promoter	NM_007068	1.99645e-11	-77.9853
chr1	200011982	+	Intron	NM_205860	1.63274e-30	-77.9659
chr1	1003969	+	-	-	2.19689e-17	-77.9646
chr1	1003973	+	-	-	2.19689e-17	-77.9646
chr1	1003995	+	-	-	2.19689e-17	-77.9646
chr11	119728895	+	-	-	0.000297038	-77.9412
chr1	228348000	+	-	-	1.20145e-05	-77.921
chr14	103059092	-	Exon	NM_015156	1.98062e-20	-77.9091
chr14	103059114	-	Exon	NM_015156	1.98062e-20	-77.9091
chr14	103059123	-	Exon	NM_015156	1.98062e-20	-77.9091
chr3	196322064	-	-	-	1.16082e-14	-77.9037
chr14	103059100	-	Exon	NM_015156	2.1144e-20	-77.8867
chr5	123899153	+	-	-	4.99529e-05	-77.8699
chr14	103059098	-	Exon	NM_015156	1.98062e-20	-77.8667
chr7	75544685	+	Promoter	NM_000941	0.00183245	-77.8604
chr7	75544715	+	Promoter	NM_000941	0.00183245	-77.8604
chr7	75544753	+	Promoter	NM_000941	0.00183245	-77.8604
chr2	10952640	-	Promoter	NM_005742	3.51837e-07	-77.8592
chr1	200011976	+	Intron	NM_205860	2.38275e-30	-77.8558
chr1	200012002	+	Intron	NM_205860	4.85701e-25	-77.8558
chr1	200011988	+	Intron	NM_205860	2.38275e-30	-77.8388
chr19	22193709	+	Exon	NM_007153	3.43767e-07	-77.7985
chr19	36247231	+	Promoter	NM_144617	6.41938e-21	-77.7868
chr20	48533681	+	-	-	6.933e-23	-77.7778
chr19	18981447	-	Intron	NM_001492,NM_021267	6.1835e-10	-77.7419
chr14	103059104	-	Exon	NM_015156	1.98062e-20	-77.7413
chr2	242447167	+	Promoter	NM_006374	1.64704e-41	-77.705
chr19	5828357	-	-	-	4.28015e-30	-77.7036
chr9	139872396	-	Promoter	NM_000954	2.99227e-12	-77.6923
chr22	43506999	+	Promoter	NM_001197	7.10583e-09	-77.6885
chrX	10124574	-	Promoter	NM_001256944,NM_001830	1.45366e-28	-77.6713
chr17	16513713	+	-	-	5.77121e-15	-77.6667
chr11	45168132	-	Promoter	NM_001256695,NM_001256696	0.00395171	-77.666
chr14	103059018	-	Exon	NM_015156	2.67583e-20	-77.6583
chr19	10402590	+	Intron	NM_003259	1.09408e-12	-77.6134
chr14	103059087	-	Exon	NM_015156	1.98062e-20	-77.6079
chr2	5813012	-	-	-	5.94316e-65	-77.5757
chr6	157695664	-	-	-	0.000364598	-77.5643
chr1	31410779	-	Intron	NM_001020658,NM_014676	2.19728e-05	-77.5641
chr22	29549022	+	Intron	NM_032045	0.0014169	-77.5539
chr21	38377915	+	Promoter	NM_018962	2.68375e-10	-77.5521
chr13	25570314	+	-	-	4.92456e-06	-77.5307
chr3	96984488	-	Intron	NM_001080448	1.71918e-14	-77.5104
chr13	20139007	-	-	-	3.88576e-25	-77.4665
chr10	86350451	-	-	-	5.40546e-17	-77.4654
chrX	39960408	+	Intron	NM_001123383,NM_001123384	3.08422e-43	-77.4315
chr6	157695653	-	-	-	0.000364598	-77.431
chr12	122517248	-	Promoter	NM_014938	1.71643e-10	-77.425
chr5	179170658	-	Intron	NM_014757	1.90828e-07	-77.422
chr9	92989540	-	-	-	4.7524e-09	-77.4194
chr11	68098769	-	Intron	NM_002335	2.69769e-21	-77.4019
chr14	103059009	-	Exon	NM_015156	2.85737e-20	-77.39
chr10	86350631	-	-	-	8.13975e-17	-77.2976
chr10	74081061	+	-	-	4.08922e-42	-77.2846
chr1	100598558	-	Promoter	NM_019083	5.81373e-10	-77.2766
chr2	10952560	-	Promoter	NM_005742	5.23211e-07	-77.271
chr10	50819671	+	Exon	NM_003055	2.74881e-07	-77.2669
chr19	48301108	-	-	-	2.87298e-29	-77.2642
chr6	157695649	-	-	-	0.000364598	-77.2478
chr18	49856370	+	-	-	9.61069e-11	-77.2361
chr14	104618262	+	Intron	NM_015656	3.01384e-32	-77.2321
chr4	2757890	+	Exon	NM_024309	1.19004e-19	-77.2209
chr6	157695678	-	-	-	0.000364598	-77.1772
chr1	163038581	+	Exon	NM_001102445	1.41748e-16	-77.1708
chrX	132547881	+	Intron	NM_001448	3.52366e-06	-77.1654
chr6	110385377	-	-	-	1.31766e-07	-77.1327
chr13	112758896	+	-	-	3.76665e-21	-77.1262
chr19	2125723	+	Intron	NM_001261826,NM_003938	1.03147e-46	-77.1146
chr1	200011998	+	Intron	NM_205860	2.38275e-30	-77.1095
chr12	120752040	-	-	-	4.79618e-09	-77.1054
chr6	157695523	-	-	-	0.000364598	-77.0862
chrX	153774105	+	Intron	NM_001099856	7.40825e-05	-77.0833
chr8	38089631	-	Exon	NM_001164232	4.26248e-06	-77.0634
chr19	13017876	+	Intron	NM_001105578	0.00308992	-77.0556
chr2	202506011	-	Intron	NM_152388	2.67014e-24	-77.0545
chr11	76757239	+	-	-	5.1277e-10	-77.0495
chr13	22202923	-	-	-	1.79344e-09	-77.0052
chr10	77167451	+	Exon	NR_024421,NR_024422	1.93158e-37	-76.9788
chr4	2757801	+	Exon	NM_024309	1.41784e-19	-76.9713
chr4	2757821	+	Exon	NM_024309	1.41784e-19	-76.9713
chr4	2757839	+	Exon	NM_024309	1.41784e-19	-76.9713
chr15	27323371	+	Intron	NM_001270873,NM_033223	7.81647e-59	-76.9658
chr2	10184146	-	Promoter	NM_001177716	4.15392e-32	-76.9654
chr16	3142568	+	Exon	NM_032805	3.33078e-08	-76.9585
chr19	13220272	+	-	-	8.67653e-22	-76.9564
chr6	157695670	-	-	-	0.000364598	-76.9285
chr6	157695672	-	-	-	0.000364598	-76.9285
chr1	100598470	-	Exon	NM_194292	9.47186e-10	-76.9183
chr2	10184073	-	Promoter	NM_001177716	3.60642e-26	-76.914
chr11	45168171	-	Promoter	NM_001256695,NM_001256696	0.00193299	-76.9048
chr4	2757799	+	Exon	NM_024309	1.71234e-19	-76.8858
chr4	2757834	+	Exon	NM_024309	1.71234e-19	-76.8858
chr4	2757928	+	Exon	NM_024309	1.71234e-19	-76.8858
chr14	104618104	+	Intron	NM_015656	1.28857e-29	-76.8842
chr22	49978225	+	-	-	1.38798e-12	-76.8805
chr6	27516987	-	-	-	4.08307e-09	-76.8769
chr4	2757935	+	Exon	NM_024309	1.69718e-16	-76.8714
chr10	77167350	+	Exon	NR_024421,NR_024422	8.24115e-38	-76.8273
chr4	6909630	-	-	-	5.46388e-14	-76.8205
chr4	2757837	+	Exon	NM_024309	2.0677e-19	-76.8004
chr20	55201839	+	-	-	1.78082e-17	-76.7905
chr13	25735530	-	-	-	1.43342e-16	-76.7871
chr20	54966495	+	Promoter	NM_001033521	2.77272e-06	-76.7843
chr2	224622032	-	Exon	NM_001039569	6.8085e-17	-76.7574
chr19	2527137	+	Intron	NM_052847	0.000633208	-76.7512
chr1	100598548	-	Promoter	NM_019083	9.47186e-10	-76.7511
chr1	100598483	-	Exon	NM_194292	9.47186e-10	-76.7511
chr13	96028861	-	-	-	2.87276e-14	-76.7414
chr1	100598517	-	Promoter	NM_019083	9.47186e-10	-76.7359
chr4	2757919	+	Exon	NM_024309	1.71234e-19	-76.7244
chr12	101802045	+	Promoter	NM_001177	6.30857e-06	-76.7048
chr1	29215108	-	Intron	NM_001166007,NM_004437	1.3746e-12	-76.7003
chr16	760784	-	-	-	1.26849e-15	-76.6962
chr6	135502957	-	Promoter	NM_001130172,NM_001130173,NM_001161656,NM_001161657,NM_001161658,NM_001161659,NM_001161660,NM_005375	1.16174e-08	-76.675
chr1	28261478	+	-	-	3.30891e-10	-76.6742
chr4	2757902	+	Exon	NM_024309	1.41784e-19	-76.6646
chr2	10184135	-	Promoter	NM_001177716	4.26312e-32	-76.6471
chr9	132200806	-	-	-	1.05912e-33	-76.632
chr15	23861473	+	-	-	2.29852e-09	-76.6268
chr11	96122862	-	Promoter	NM_001261833,NM_003772	5.16846e-10	-76.6252
chr8	20069631	+	-	-	4.42429e-21	-76.6227
chr1	200011906	+	Intron	NM_205860	2.72198e-28	-76.6172
chr13	41233005	+	Intron	NM_002015	0.0037093	-76.6134
chr1	100598535	-	Promoter	NM_019083	9.47186e-10	-76.5839
chr1	15672777	+	Intron	NM_052929	7.66985e-17	-76.5544
chr11	116078722	-	-	-	1.67923e-05	-76.5368
chr3	168630376	-	-	-	1.5361e-08	-76.506
chr1	100598492	-	Exon	NM_194292	1.49063e-09	-76.4996
chr4	2757922	+	Exon	NM_024309	2.0677e-19	-76.4936
chr6	135502966	-	Promoter	NM_001130172,NM_001130173,NM_001161656,NM_001161657,NM_001161658,NM_001161659,NM_001161660,NM_005375	1.04196e-08	-76.4896
chr2	56411105	+	Promoter	NM_001080433	6.13498e-07	-76.4815
chr5	177936383	-	Intron	NM_173465	7.41052e-06	-76.48
chr19	31844954	+	-	-	1.92805e-42	-76.461
chr1	1004003	+	-	-	3.42691e-14	-76.4587
chr6	135502993	-	Promoter	NM_001130172,NM_001130173,NM_001161656,NM_001161657,NM_001161658,NM_001161659,NM_001161660,NM_005375	1.11374e-08	-76.4214
chr7	99114019	-	Intron	NM_014569,NM_145102	4.32763e-19	-76.3961
chr2	10184155	-	Promoter	NM_001177716	9.85084e-32	-76.3904
chr2	10184176	-	Promoter	NM_001177716	9.85084e-32	-76.3904
chr6	135502977	-	Promoter	NM_001130172,NM_001130173,NM_001161656,NM_001161657,NM_001161658,NM_001161659,NM_001161660,NM_005375	1.15156e-08	-76.387
chr4	2757893	+	Exon	NM_024309	1.83411e-19	-76.385
chr6	135502899	-	Promoter	NM_001130172,NM_001130173,NM_001161656,NM_001161657,NM_001161658,NM_001161659,NM_001161660,NM_005375	1.16174e-08	-76.3731
chr2	182322408	+	Exon	NM_000885	9.85664e-12	-76.3603
chr2	10184109	-	Promoter	NM_001177716	1.46493e-31	-76.3456
chr14	103059117	-	Exon	NM_015156	1.28125e-18	-76.3377
chr20	39993031	+	Intron	NM_052846	9.58273e-34	-76.324
chr8	11799717	+	-	-	1.34497e-60	-76.315
chr1	150293464	-	Promoter	NM_004698	6.9641e-05	-76.3148
chr2	206750488	-	-	-	1.48834e-09	-76.3098
chr9	139051297	+	-	-	3.5212e-32	-76.3074
chr10	25836351	+	Intron	NM_020752	6.56492e-41	-76.2977
chr4	2757895	+	Exon	NM_024309	3.04165e-18	-76.2932
chr10	3558061	-	-	-	6.14568e-07	-76.2727
chr20	55201830	+	-	-	3.91297e-17	-76.2703
chr7	139906159	-	-	-	3.55434e-37	-76.2674
chr5	1931878	-	-	-	6.61737e-25	-76.2471
chr14	70193496	+	-	-	1.50887e-42	-76.2444
chr2	10184087	-	Promoter	NM_001177716	8.09307e-32	-76.2352
chr2	131011045	-	-	-	5.71372e-27	-76.233
chr22	25817150	-	-	-	2.6673e-10	-76.2063
chr8	56953521	-	-	-	5.65689e-08	-76.2006
chr8	54794804	-	Intron	NM_170587	2.37785e-09	-76.1979
chr8	54794869	-	Intron	NM_170587	2.37785e-09	-76.1979
chr8	54794874	-	Intron	NM_170587	2.37785e-09	-76.1979
chr14	103059127	-	Exon	NM_015156	1.55964e-20	-76.1862
chr8	54794801	-	Intron	NM_170587	2.50556e-09	-76.1599
chr9	131218102	-	Promoter	NM_001242352,NM_001242353,NM_001242354,NM_002540,NM_153432,NM_153435,NM_153439	1.45985e-12	-76.1527
chr2	206750469	-	-	-	1.44011e-09	-76.1484
chr2	97593436	+	Intron	NM_001122646	8.98067e-37	-76.1405
chr17	1203251	+	Exon	NM_172367	5.12611e-46	-76.1294
chr14	65754486	-	-	-	4.5677e-19	-76.1276
chr22	25817213	-	-	-	3.25716e-10	-76.1137
chr3	47189269	+	Intron	NM_014159	0.00305679	-76.1104
chr9	135117325	+	Exon	NM_032536	2.09108e-18	-76.1031
chr20	55201657	+	-	-	7.60797e-17	-76.0637
chr1	234367047	-	Intron	NM_173508	1.06566e-15	-76.0612
chr22	25817180	-	-	-	3.82979e-10	-76.0362
chr22	25817251	-	-	-	3.82979e-10	-76.0362
chr8	54794872	-	Intron	NM_170587	2.94428e-09	-76.0272
chr2	10184081	-	Promoter	NM_001177716	3.47785e-31	-76.0246
chr2	10184157	-	Promoter	NM_001177716	3.47785e-31	-76.0246
chr6	135502892	-	Promoter	NM_001130172,NM_001130173,NM_001161656,NM_001161657,NM_001161658,NM_001161659,NM_001161660,NM_005375	1.16174e-08	-76.0081
chr17	65796654	-	-	-	8.75186e-29	-76
chrX	132547836	+	Intron	NM_001448	3.52366e-06	-76
chr1	53309105	-	Promoter	NM_001004339	2.65635e-14	-75.9824
chr19	48162168	-	Intron	NM_015711	6.89254e-39	-75.9803
chr9	131217996	-	Promoter	NM_001242352,NM_001242353,NM_001242354,NM_002540,NM_153432,NM_153435,NM_153439	7.53007e-13	-75.9774
chr2	10184141	-	Promoter	NM_001177716	6.80476e-31	-75.9771
chr17	47756774	+	-	-	0.000206207	-75.9737
chr1	53309113	-	Promoter	NM_001004339	2.48718e-14	-75.9615
chr8	54794828	-	Intron	NM_170587	2.64e-09	-75.9598
chr17	1670349	+	Intron	NM_002615	4.77466e-11	-75.9596
chr8	54794876	-	Intron	NM_170587	2.37785e-09	-75.9516
chr19	19453527	+	-	-	3.31636e-25	-75.9494
chr8	54794893	-	Intron	NM_170587	2.37785e-09	-75.9491
chr9	139889928	+	Exon	NM_004669	1.67969e-15	-75.938
chr20	55201655	+	-	-	3.91297e-17	-75.9348
chr9	131218116	-	Promoter	NM_001242352,NM_001242353,NM_001242354,NM_002540,NM_153432,NM_153435,NM_153439	7.89695e-13	-75.9081
chr1	15118247	-	Intron	NM_015209,NM_201628	6.06951e-12	-75.9036
chr9	139222746	+	Promoter	NM_001145638,NM_015597	2.87885e-11	-75.8974
chr2	242447150	+	Promoter	NM_006374	5.60897e-38	-75.8935
chr2	242447175	+	Promoter	NM_006374	5.60897e-38	-75.8935
chr2	242447209	+	Promoter	NM_006374	5.60897e-38	-75.8935
chr2	242447222	+	Promoter	NM_006374	5.60897e-38	-75.8935
chr2	242447242	+	Promoter	NM_006374	5.60897e-38	-75.8935
chr18	19170084	-	Intron	NM_052911	2.0062e-40	-75.8796
chr22	25817167	-	-	-	5.42795e-10	-75.8661
chr2	206750516	-	-	-	2.06885e-09	-75.8572
chr19	1732553	-	-	-	9.99393e-09	-75.8376
chr2	206750459	-	-	-	1.7007e-09	-75.832
chr9	131218113	-	Promoter	NM_001242352,NM_001242353,NM_001242354,NM_002540,NM_153432,NM_153435,NM_153439	8.45585e-13	-75.823
chr9	131218122	-	Promoter	NM_001242352,NM_001242353,NM_001242354,NM_002540,NM_153432,NM_153435,NM_153439	8.45585e-13	-75.823
chr8	54794806	-	Intron	NM_170587	3.82483e-09	-75.8174
chr1	53309107	-	Promoter	NM_001004339	2.48718e-14	-75.8147
chr1	53309128	-	Promoter	NM_001004339	2.48718e-14	-75.8147
chr22	29999951	+	Exon	NM_000268,NM_016418,NM_181825,NM_181828,NM_181829,NM_181830,NM_181831,NM_181832,NM_181833	2.6108e-09	-75.8111
chr9	135117330	+	Exon	NM_032536	2.09108e-18	-75.8001
chr9	135117338	+	Exon	NM_032536	2.09108e-18	-75.8001
chr9	135117340	+	Exon	NM_032536	2.09108e-18	-75.8001
chr9	135117342	+	Exon	NM_032536	2.09108e-18	-75.8001
chr9	135117236	+	Intron	NM_032536	2.09108e-18	-75.8001
chr19	46526675	+	Promoter	NM_005091	6.83023e-24	-75.7955
chr10	75320584	+	Intron	NM_152586	1.24737e-09	-75.7941
chr17	73831456	-	Intron	NM_199242	4.0038e-08	-75.7905
chr2	242447229	+	Promoter	NM_006374	5.60897e-38	-75.7783
chr19	46916378	-	Exon	NM_032040	2.57391e-13	-75.7748
chr12	121799928	-	-	-	5.49001e-06	-75.7304
chr14	52712202	-	-	-	0.00232337	-75.7143
chr9	135117267	+	Exon	NM_032536	2.09108e-18	-75.6952
chr20	55201797	+	-	-	1.82127e-16	-75.6841
chr2	56411072	+	Promoter	NM_001080433	2.75611e-07	-75.6772
chr1	46130163	-	Intron	NM_021639	5.16855e-11	-75.6618
chr19	53449209	-	Intron	NM_001202473	3.39826e-08	-75.6327
chr22	47679599	-	-	-	4.98387e-10	-75.6277
chr20	55201824	+	-	-	2.98835e-16	-75.6274
chr2	10184098	-	Promoter	NM_001177716	3.47813e-31	-75.6262
chr4	2757842	+	Exon	NM_024309	1.27493e-17	-75.6152
chr9	131217966	-	Promoter	NM_001242352,NM_001242353,NM_001242354,NM_002540,NM_153432,NM_153435,NM_153439	9.65595e-13	-75.6028
chr6	44649866	-	-	-	1.02989e-18	-75.5993
chr9	131217984	-	Promoter	NM_001242352,NM_001242353,NM_001242354,NM_002540,NM_153432,NM_153435,NM_153439	1.06177e-12	-75.5985
chr8	102480649	-	-	-	2.3241e-18	-75.5952
chr8	22447427	-	Intron	NM_198042	1.89895e-37	-75.5837
chr7	71098398	+	Intron	NM_022479	2.7208e-52	-75.5781
chr2	56411040	+	Promoter	NM_001080433	3.52084e-07	-75.5556
chr2	56411053	+	Promoter	NM_001080433	3.52084e-07	-75.5556
chr11	124670202	+	Exon	NM_024631	4.22983e-32	-75.5352
chr1	53308938	-	Promoter	NM_001004339	2.48718e-14	-75.5342
chr19	8006427	-	Intron	NM_006351	5.87429e-12	-75.5319
chr6	170252027	+	-	-	4.5717e-19	-75.518
chr22	20104938	-	Promoter	NM_001257994,NM_022727,NM_182984	8.789e-12	-75.5167
chr2	242447161	+	Promoter	NM_006374	5.70859e-37	-75.5145
chr21	42218597	-	Promoter	NM_001271534,NM_001389,NR_073202	8.49918e-18	-75.5126
chr19	30751928	-	-	-	1.52589e-06	-75.4975
chr6	135502880	-	Promoter	NM_001130172,NM_001130173,NM_001161656,NM_001161657,NM_001161658,NM_001161659,NM_001161660,NM_005375	1.16174e-08	-75.4962
chr9	129517420	-	-	-	0.00105904	-75.4902
chr2	101618720	+	Exon	NM_000993,NM_001098577,NM_001099693	0.000167802	-75.4728
chr1	42127589	-	Intron	NM_024503	0.000422072	-75.4624
chr17	67417936	-	Intron	NM_002758	0.000249395	-75.4451
chr2	206750522	-	-	-	1.7007e-09	-75.4331
chr7	127808869	-	-	-	2.39776e-12	-75.4274
chr2	101618699	+	Exon	NM_000993,NM_001098577,NM_001099693	0.000167802	-75.4246
chr10	4888195	-	Intron	NM_001040177,NM_001271021,NM_001271025,NR_073125,NR_073126,NR_073127	1.50734e-08	-75.4237
chr14	69446650	+	Exon	NR_073422	2.59745e-49	-75.405
chr21	42218534	-	Promoter	NM_001271534,NM_001389,NR_073202	8.49918e-18	-75.3895
chr1	3028927	-	Intron	NM_022114,NM_199454	5.14184e-18	-75.3782
chr2	56411023	+	Promoter	NM_001080433	3.52084e-07	-75.3704
chr2	56411027	+	Promoter	NM_001080433	3.52084e-07	-75.3704
chr22	25817158	-	-	-	3.96683e-10	-75.3541
chr2	101618747	+	Exon	NM_000993,NM_001098577,NM_001099693	4.549e-05	-75.3507
chr15	77919590	-	Intron	NM_032808	3.86003e-14	-75.3463
chr14	69481629	+	-	-	9.88005e-07	-75.316
chr18	47928379	+	-	-	7.14009e-20	-75.316
chr2	56411065	+	Promoter	NM_001080433	3.52084e-07	-75.3119
chr2	10184078	-	Promoter	NM_001177716	3.48515e-31	-75.3103
chr14	69446685	+	Exon	NR_073422	4.51308e-49	-75.2875
chr14	69446728	+	Exon	NR_073422	4.51308e-49	-75.2875
chr22	25817164	-	-	-	4.5664e-10	-75.2845
chr2	85830101	-	Exon	NR_046347	2.70367e-44	-75.2813
chr2	85830160	-	Exon	NR_046347	2.70367e-44	-75.2813
chr2	85830176	-	Exon	NR_046347	8.62622e-45	-75.2557
chr1	42127622	-	Intron	NM_024503	0.000441842	-75.2511
chr2	85830168	-	Exon	NR_046347	2.70367e-44	-75.2292
chr21	42218517	-	Promoter	NM_001271534,NM_001389,NR_073202	1.53483e-17	-75.2198
chr10	43950886	-	Intron	NR_026693	5.55731e-13	-75.2187
chr4	188953235	+	-	-	6.98294e-31	-75.2176
chr14	69446722	+	Exon	NR_073422	2.12242e-49	-75.2113
chr3	39330378	-	-	-	3.08521e-07	-75.1956
chr1	42127481	-	Intron	NM_024503	0.000475426	-75.1866
chr3	125899144	+	Exon	NR_046383	1.75379e-14	-75.1747
chr16	72879326	-	Intron	NM_001164766,NM_006885	6.07649e-37	-75.1705
chr21	47010789	+	-	-	7.68121e-09	-75.1534
chr19	48162186	-	Intron	NM_015711	1.55946e-38	-75.1353
chr12	122517233	-	Promoter	NM_014938	8.62892e-13	-75.1304
chr14	69446695	+	Exon	NR_073422	2.59745e-49	-75.1302
chr19	797859	+	Promoter	NM_002819,NM_031990,NM_031991	3.67245e-26	-75.1214
chr2	121580820	-	Intron	NM_005270	8.81036e-05	-75.1121
chr14	74111359	+	Promoter	NM_001201366,NM_031427	2.38644e-30	-75.1094
chr17	79229386	-	Intron	NM_001037984,NM_138570	7.42373e-11	-75.1065
chr1	42127452	-	Intron	NM_024503	0.000475426	-75.1005
chr1	42127475	-	Intron	NM_024503	0.000475426	-75.0933
chr1	42127604	-	Intron	NM_024503	0.000475426	-75.0933
chr20	52793306	-	-	-	1.90252e-19	-75.0932
chr19	825089	+	-	-	4.19347e-10	-75.0891
chr1	42127574	-	Intron	NM_024503	0.00048926	-75.0864
chr9	131218126	-	Promoter	NM_001242352,NM_001242353,NM_001242354,NM_002540,NM_153432,NM_153435,NM_153439	7.53007e-13	-75.0845
chr2	85830082	-	Exon	NR_046347	2.70367e-44	-75.0821
chr4	40094866	-	Intron	NM_018177	9.31985e-23	-75.0745
chrX	39960469	+	Intron	NM_001123383,NM_001123384	6.35958e-35	-75.0702
chr20	34204848	-	Intron	NM_003116	4.09863e-46	-75.0485
chr15	53088602	+	-	-	9.62353e-12	-75.044
chr14	69446689	+	Exon	NR_073422	4.51308e-49	-75.0344
chr4	24801414	-	Exon	NM_003102	2.89686e-36	-75.0237
chr12	122517327	-	Promoter	NM_014938	8.62892e-13	-75.0173
chr20	61939836	+	-	-	7.62768e-11	-75
chr14	105944679	-	Intron	NR_073083	7.04939e-06	-75
chr8	144652058	+	-	-	0.00134433	-75
chr1	36349428	+	Promoter	NM_012199	4.458e-05	-74.9895
chr11	124670235	+	Exon	NM_024631	2.97704e-29	-74.971
chr9	135117245	+	Intron	NM_032536	3.79681e-17	-74.9689
chr1	100598474	-	Exon	NM_194292	9.47186e-10	-74.9654
chr11	10831440	+	Promoter	NM_001042559,NM_001418	4.39219e-14	-74.959
chr15	77835755	+	-	-	1.33029e-40	-74.9415
chr17	79500996	+	Intron	NM_001077182,NM_012418	7.96039e-07	-74.9327
chr13	20139015	-	-	-	1.86516e-26	-74.9208
chr17	7966969	-	-	-	1.20515e-07	-74.9082
chr1	42127613	-	Intron	NM_024503	0.000510764	-74.9067
chr1	42127485	-	Intron	NM_024503	0.00048926	-74.8995
chr14	69446762	+	Exon	NR_073422	2.18054e-31	-74.8826
chr19	14591226	-	Exon	NM_005716,NM_202468,NM_202469,NM_202470,NM_202494	1.91134e-06	-74.8718
chr11	124670289	+	Exon	NM_024631	1.88967e-29	-74.8593
chr2	206750444	-	-	-	1.7007e-09	-74.8517
chr10	61666651	-	Promoter	NM_005436	4.21965e-11	-74.8433
chr9	135117224	+	Intron	NM_032536	2.09108e-18	-74.8386
chr7	56895111	+	-	-	5.15868e-25	-74.8384
chr2	242447137	+	Promoter	NM_006374	1.31354e-33	-74.8356
chr19	30053537	+	Intron	NM_001146339	1.29905e-13	-74.8297
chr11	124670285	+	Exon	NM_024631	3.09272e-29	-74.8188
chr11	124670292	+	Exon	NM_024631	3.09272e-29	-74.8188
chr11	124670300	+	Promoter	NM_024631	3.09272e-29	-74.8188
chr11	124670246	+	Exon	NM_024631	1.25323e-28	-74.8188
chr17	59489130	+	Exon	NM_203425	5.73651e-05	-74.8071
chr17	59489133	+	Exon	NM_203425	5.73651e-05	-74.8071
chr17	59489079	+	Promoter	NM_203425	5.73651e-05	-74.8071
chr4	129048711	-	Intron	NM_018078	0.000843734	-74.8065
chr7	101899430	-	Intron	NM_001202544,NM_001202545,NM_001202546,NM_001913,NM_181500	5.48422e-10	-74.8042
chr19	797943	+	Promoter	NM_002819,NM_031990,NM_031991	7.48892e-35	-74.8013
chr12	70486480	+	-	-	5.95681e-25	-74.7973
chr20	17755574	-	-	-	3.83117e-32	-74.7908
chr9	135117254	+	Intron	NM_032536	5.1072e-17	-74.7797
chr4	2757819	+	Exon	NM_024309	1.04494e-17	-74.7757
chr10	70660627	+	Promoter	NM_024045	1.82316e-12	-74.7639
chr22	25817143	-	-	-	2.40842e-08	-74.7631
chr2	101618851	+	Promoter	NM_000993,NM_001098577,NM_001099693	0.000167802	-74.7585
chr2	101618865	+	Promoter	NM_000993,NM_001098577,NM_001099693	0.000167802	-74.7585
chr12	49484985	+	Exon	NM_021044	6.96241e-32	-74.7556
chr11	55979657	+	-	-	2.17626e-12	-74.7515
chr3	127127702	+	-	-	1.80302e-27	-74.7375
chr14	69446752	+	Exon	NR_073422	2.84505e-39	-74.7365
chr19	10542563	-	Promoter	NM_001111309	9.96585e-49	-74.7335
chr9	132200892	-	-	-	1.59426e-21	-74.7315
chr16	28583738	-	Intron	NM_138414	9.33676e-13	-74.7281
chr11	71935105	+	Promoter	NM_001567	1.58978e-06	-74.7258
chr11	45168168	-	Promoter	NM_001256695,NM_001256696	0.00275465	-74.7171
chr20	2732250	-	Intron	NM_001110514	5.40684e-23	-74.7093
chr22	41922879	+	Exon	NM_001018050,NM_001018052,NM_138338	4.93705e-16	-74.7093
chrX	41793638	-	-	-	1.16109e-20	-74.7025
chr11	69463640	-	Intron	NM_053056	1.64166e-24	-74.6901
chr14	69446664	+	Exon	NR_073422	3.14348e-47	-74.6822
chr1	53308968	-	Promoter	NM_001004339	2.48718e-14	-74.6795
chr2	116198387	+	Intron	NM_001004360,NM_001178034,NM_001178036,NM_001178037,NM_020868	3.74077e-11	-74.6502
chr4	165957889	+	Intron	NM_001258025,NM_152620	0.000601025	-74.6178
chr16	84898073	+	Intron	NM_031476	1.46161e-09	-74.6115
chr12	122517325	-	Promoter	NM_014938	9.25506e-13	-74.5852
chr17	59489088	+	Promoter	NM_203425	7.35617e-05	-74.5338
chr9	132200852	-	-	-	1.6768e-21	-74.5329
chr21	45527559	+	Promoter	NM_005049	2.58095e-56	-74.5281
chr3	190971045	+	-	-	3.57982e-16	-74.5093
chr7	75544690	+	Promoter	NM_000941	0.00183246	-74.4881
chr11	125939112	+	-	-	8.87233e-17	-74.4813
chr9	135089591	-	Intron	NM_032536	3.14892e-11	-74.4709
chr9	140057205	-	Intron	NM_000832,NM_001185090,NM_001185091,NM_007327,NM_021569	1.49382e-09	-74.4667
chr11	118591670	+	-	-	4.15802e-76	-74.4596
chr17	21416398	-	-	-	0.000601876	-74.4557
chr14	55596202	+	Promoter	NM_001177388,NM_002306	4.93759e-16	-74.4526
chr7	132262343	-	Intron	NM_181775	0.000151678	-74.4504
chr4	149747934	-	-	-	8.22227e-05	-74.4416
chr10	81026426	+	Intron	NM_020338	1.53851e-12	-74.4249
chr5	956701	+	-	-	1.68781e-31	-74.4183
chrX	140271626	+	Promoter	NM_012317	3.00198e-14	-74.4048
chr15	43648748	-	-	-	9.2643e-19	-74.3992
chr12	3617668	-	Intron	NM_019854	1.7836e-05	-74.3914
chr21	42218604	-	Promoter	NM_001271534,NM_001389,NR_073202	8.49918e-18	-74.3879
chrX	136631676	-	-	-	3.94294e-21	-74.3806
chr17	40699007	+	-	-	0.00076055	-74.375
chr14	69446742	+	Exon	NR_073422	7.19328e-47	-74.3718
chr7	101413777	-	-	-	0.00127641	-74.3672
chr11	47206703	+	Promoter	NM_001184975	1.15871e-22	-74.3671
chr20	55201674	+	-	-	2.05394e-16	-74.3446
chr5	126109229	-	-	-	1.95061e-06	-74.3305
chr22	46348247	+	Intron	NM_058238	9.00235e-15	-74.3056
chr12	2245194	-	Intron	NM_000719,NM_001129827,NM_001129829,NM_001129830,NM_001129831,NM_001129832,NM_001129833,NM_001129834,NM_001129835,NM_001129836,NM_001129837,NM_001129838,NM_001129839,NM_001129840,NM_001129841,NM_001129842,NM_001129843,NM_001129844,NM_001129846,NM_001167623,NM_001167624,NM_001167625,NM_199460	7.94768e-07	-74.2907
chr7	150655673	-	Intron	NM_000238,NM_172056	2.10643e-07	-74.2857
chr11	47371154	-	Intron	NM_000256	3.41247e-17	-74.2621
chr1	153748790	-	Intron	NM_024330	1.17446e-08	-74.2574
chr14	95702776	+	Intron	NM_024734	7.28584e-38	-74.2265
chr5	166801906	+	Intron	NM_001122679	3.89093e-22	-74.2168
chr7	152581802	+	-	-	2.59057e-10	-74.2154
chr22	49447612	-	-	-	2.29413e-11	-74.199
chr10	118975750	-	-	-	1.14522e-11	-74.1796
chr20	2732241	-	Intron	NM_001110514	4.49963e-23	-74.1665
chr12	4429212	+	-	-	4.03324e-05	-74.1658
chr19	45475796	-	Intron	NM_001294,NR_040006,NR_040007	0.000236029	-74.1434
chr2	101618745	+	Exon	NM_000993,NM_001098577,NM_001099693	0.000107044	-74.1433
chr2	56411016	+	Promoter	NM_001080433	3.52084e-07	-74.1204
chr17	74381964	-	Promoter	NM_001142602	4.50291e-38	-74.1112
chr17	48128070	-	Exon	NR_038230	4.43397e-08	-74.0981
chr4	11370514	+	Exon	NR_030298	9.94519e-14	-74.0848
chr9	132200898	-	-	-	1.59426e-21	-74.0803
chr12	7046597	-	Exon	NM_001007026,NM_001940	8.4054e-14	-74.0741
chr3	13036112	+	Intron	NM_001134382	1.81062e-24	-74.0661
chr10	121652062	+	Promoter	NM_007190,NR_037771	1.5092e-12	-74.0438
chr9	131694102	-	Intron	NM_001100876,NM_001100877,NM_174933	1.89277e-10	-74.043
chr11	119292810	-	Intron	NR_034160	1.55459e-39	-74.0196
chr11	4298749	+	-	-	2.45354e-33	-74.0151
chr11	64008455	+	Exon	NM_004470	1.82413e-41	-73.9806
chr6	158131806	-	-	-	2.13717e-23	-73.9796
chr11	124670268	+	Exon	NM_024631	1.32692e-28	-73.9786
chr17	59478277	-	Intron	NM_005994	4.53222e-20	-73.9712
chr11	57281992	+	Promoter	NM_001198810	2.66623e-15	-73.9673
chr1	42127587	-	Intron	NM_024503	0.000475426	-73.9569
chr1	53309610	-	Intron	NM_001004339	7.46547e-11	-73.9437
chr4	41213687	+	Intron	NM_001166050,NM_004307,NM_173075	0.00450398	-73.9437
chr22	46368536	+	Intron	NM_058238	3.9149e-20	-73.9278
chr6	170445739	-	-	-	3.87127e-11	-73.913
chr17	73279617	-	Exon	NM_001126121,NM_001126122,NM_021734	3.79666e-20	-73.9046
chr1	28238369	+	Intron	NM_002946	5.46376e-05	-73.8971
chr5	14582163	+	Promoter	NM_019018	0.000264669	-73.8647
chr11	4415303	+	Promoter	NM_003141	0.00106978	-73.8579
chr19	1288405	+	Intron	NM_001405	5.92852e-18	-73.8542
chr15	68934765	-	Intron	NM_006091	8.34385e-07	-73.8481
chr11	2817029	+	Intron	NM_000218,NR_040711	1.56206e-09	-73.8342
chr11	45168249	-	Promoter	NM_001256695,NM_001256696	0.00293343	-73.8187
chr2	10184184	-	Promoter	NM_001177716	3.2743e-29	-73.8142
chr20	48619576	-	-	-	0.000143233	-73.7988
chr1	53309638	-	Intron	NM_001004339	7.15814e-11	-73.7969
chr19	13043830	+	Promoter	NM_004461	6.26077e-28	-73.7967
chr4	15508435	-	-	-	1.16263e-10	-73.789
chrX	152939733	-	Exon	NM_001039582	6.63145e-18	-73.7798
chr10	111971200	+	Intron	NM_130439	2.15716e-22	-73.7715
chr1	38513443	+	Promoter	NM_002699	1.91312e-24	-73.7711
chrX	136511224	+	-	-	2.30463e-35	-73.7501
chr20	48771406	+	-	-	1.43475e-13	-73.7254
chr3	125899064	+	Exon	NR_046383	2.29655e-22	-73.7188
chrX	17395817	-	Intron	NM_198270	2.02004e-30	-73.7104
chr2	239385444	-	-	-	0.00113499	-73.7103
chr7	1336322	-	-	-	5.19611e-24	-73.7068
chr1	38513460	+	-	-	2.28032e-24	-73.6901
chr17	35014857	+	-	-	1.64438e-31	-73.6496
chr15	29232811	+	Intron	NM_001130414,NM_005503	1.85829e-10	-73.62
chr6	160019396	+	-	-	4.04753e-17	-73.6192
chr3	125899081	+	Exon	NR_046383	5.49616e-22	-73.6012
chr11	45168252	-	Promoter	NM_001256695,NM_001256696	0.00310134	-73.5925
chr11	45168255	-	Promoter	NM_001256695,NM_001256696	0.00310134	-73.5925
chr11	45168258	-	Promoter	NM_001256695,NM_001256696	0.00310134	-73.5925
chr11	45168261	-	Promoter	NM_001256695,NM_001256696	0.00310134	-73.5925
chr11	45168266	-	Promoter	NM_001256695,NM_001256696	0.00310134	-73.5925
chr11	45168291	-	Promoter	NM_001256695,NM_001256696	0.00310134	-73.5925
chr5	140711852	+	Exon	NM_018912	3.60545e-21	-73.5905
chr3	9550724	-	Intron	NM_198560	5.80063e-09	-73.5821
chr8	145004539	-	-	-	2.05357e-13	-73.5796
chr20	17594327	-	Exon	NM_001042576,NM_004587	3.45766e-13	-73.5671
chr12	101856337	+	-	-	5.03975e-06	-73.5662
chr10	134683287	-	Intron	NM_001200049	7.7786e-19	-73.5503
chr2	239385434	-	-	-	0.00113499	-73.5393
chr6	158131942	-	-	-	2.1382e-23	-73.525
chr16	4942393	+	Intron	NM_002705	2.77618e-27	-73.5198
chr16	21523123	-	-	-	0.000253093	-73.5119
chr22	29549199	+	Intron	NM_032045	0.000764044	-73.5117
chr17	40936492	+	Exon	NM_032387	0.000121985	-73.5012
chr19	55993608	-	Exon	NM_033113	0.000215027	-73.495
chr11	334898	-	-	-	3.20253e-28	-73.4889
chr1	32054807	+	-	-	1.06734e-05	-73.4754
chr4	146819270	-	Intron	NM_178835	6.02898e-25	-73.457
chr17	40936483	+	Exon	NM_032387	0.000124754	-73.4567
chrX	5365739	+	-	-	3.59344e-06	-73.447
chr4	39184028	+	Promoter	NM_025132	3.60185e-23	-73.4448
chr22	24081879	-	-	-	1.64357e-17	-73.4375
chr12	33592151	-	Promoter	NM_198992	0.000109958	-73.433
chr20	35576945	+	Intron	NM_015474	0.00112418	-73.4211
chr10	27194758	-	-	-	3.41545e-13	-73.4162
chr17	65014366	+	Exon	NM_014405	0.000227576	-73.4107
chr1	44510138	+	-	-	4.44813e-05	-73.3939
chr11	124670238	+	Exon	NM_024631	3.16992e-27	-73.3902
chr20	44650477	+	Exon	NM_001134771	2.22357e-09	-73.3869
chr19	44079718	-	Exon	NM_006297	6.47264e-20	-73.3855
chr2	121580836	-	Intron	NM_005270	9.09821e-05	-73.3696
chr2	182322317	+	Exon	NM_000885	3.65835e-10	-73.36
chr7	132262390	-	Intron	NM_181775	3.38583e-05	-73.3466
chr16	87453000	-	Intron	NM_015144	1.01528e-54	-73.3335
chr10	125858444	-	-	-	2.39255e-17	-73.3273
chrX	31746343	+	Intron	NM_000109,NM_004006,NM_004007,NM_004009,NM_004010,NM_004011,NM_004012,NM_004013,NM_004020,NM_004021,NM_004022,NM_004023	5.44344e-05	-73.3262
chr19	48794415	-	-	-	1.22681e-15	-73.3226
chr15	53088589	+	-	-	8.37598e-12	-73.2989
chr9	139028103	+	-	-	1.427e-41	-73.2808
chr17	40823481	-	Exon	NM_024927	1.51775e-14	-73.2794
chr17	73831482	-	Intron	NM_199242	3.95378e-09	-73.2455
chr17	59489149	+	Exon	NM_203425	0.00019195	-73.2219
chr6	692642	+	Promoter	NM_018303,NR_073064	1.89877e-19	-73.1774
chr11	71017912	-	-	-	3.1094e-06	-73.175
chr2	202860871	-	-	-	1.21329e-18	-73.1735
chr14	104607199	-	Intron	NM_015656	1.4067e-24	-73.1514
chr11	45168153	-	Promoter	NM_001256695,NM_001256696	0.00310134	-73.146
chr11	45168263	-	Promoter	NM_001256695,NM_001256696	0.00310134	-73.146
chr11	45168275	-	Promoter	NM_001256695,NM_001256696	0.00310134	-73.146
chr19	36247223	+	Promoter	NM_144617	1.58938e-24	-73.1425
chr1	160056019	-	Intron	NM_004983	1.94274e-24	-73.1405
chr11	45168155	-	Promoter	NM_001256695,NM_001256696	0.00345933	-73.14
chr16	77707889	+	-	-	0.00013868	-73.1271
chr21	44898998	-	Promoter	NR_026863	8.50337e-05	-73.1034
chr2	182322306	+	Exon	NM_000885	4.05034e-11	-73.1033
chr10	25836168	+	Intron	NM_020752	7.02896e-38	-73.1008
chr12	89627771	+	-	-	0.0044222	-73.1005
chr17	73831532	-	Exon	NM_199242	3.95378e-09	-73.0902
chr17	73981901	-	Intron	NM_001113324,NR_037709	1.43576e-08	-73.0717
chr7	132262369	-	Intron	NM_181775	9.83014e-06	-73.0581
chr20	48807409	+	Exon	NM_005194	3.1159e-10	-73.0496
chr2	202860934	-	-	-	1.31592e-18	-73.0452
chr3	137893555	-	Exon	NM_016216	0.00450836	-73.0445
chr17	74100811	-	Promoter	NM_001013839,NM_001145297,NM_001145298,NM_001145299,NM_015219	1.25581e-21	-73.0247
chr16	87636316	-	Promoter	NM_001271604,NM_001271605,NM_020655	0.000106168	-73.0207
chr10	135342207	-	Intron	NM_000773	2.91202e-10	-73.0177
chr10	135342216	-	Intron	NM_000773	2.91202e-10	-73.0177
chr9	68291900	+	-	-	1.55717e-24	-73.0147
chr19	2276138	+	Exon	NM_198532	1.57306e-40	-73.01
chr17	73831464	-	Intron	NM_199242	4.98977e-09	-73.0047
chr19	42795540	-	Exon	NM_015125	6.35664e-13	-73
chr11	73073466	-	Intron	NM_014786	2.08101e-23	-72.9836
chr11	48587537	-	-	-	2.69479e-13	-72.9818
chr17	74071873	-	Promoter	NM_003857	0.00014698	-72.9626
chr17	7108132	-	Intron	NM_001128827,NM_001365	2.16935e-12	-72.9413
chr7	65508885	+	-	-	0.00206976	-72.9397
chr19	44079620	-	Exon	NM_006297	6.47264e-20	-72.9272
chr10	135342203	-	Intron	NM_000773	3.25018e-10	-72.9195
chr10	135342304	-	Intron	NM_000773	3.25018e-10	-72.9195
chr10	135342325	-	Intron	NM_000773	3.25018e-10	-72.9195
chr1	3263582	-	Intron	NM_022114,NM_199454	5.43615e-23	-72.9096
chr17	73831539	-	Exon	NM_199242	5.54292e-09	-72.8896
chr14	100680750	-	-	-	4.88068e-20	-72.8873
chr7	6475111	-	Intron	NM_139179	1.53565e-11	-72.8774
chr13	113655560	+	Promoter	NM_024979	4.34307e-18	-72.8615
chr1	38513419	+	Promoter	NM_002699	2.14418e-24	-72.8554
chr16	28564853	+	Promoter	NM_138414	2.93112e-11	-72.8395
chr19	44079724	-	Exon	NM_006297	6.47264e-20	-72.8239
chr17	80569027	+	-	-	4.01996e-28	-72.8175
chr12	94960433	-	-	-	2.96767e-44	-72.814
chr18	76766327	+	-	-	5.01326e-13	-72.8038
chr19	44079629	-	Exon	NM_006297	2.62711e-19	-72.7967
chr9	19049650	-	Exon	NM_006570	2.48943e-09	-72.7886
chr1	156710376	-	Promoter	NM_024540,NM_145729	1.63018e-17	-72.7824
chr2	190744274	+	-	-	2.83906e-06	-72.7794
chr19	6218549	+	Intron	NM_005934	1.57425e-05	-72.773
chr3	125899052	+	Exon	NR_046383	5.86992e-22	-72.7586
chr20	46579308	-	-	-	1.81359e-07	-72.7455
chr3	125899086	+	Exon	NR_046383	5.49616e-22	-72.7376
chr5	176909433	+	-	-	2.53865e-11	-72.7273
chr9	14575966	-	-	-	0.00023502	-72.7236
chr19	44079617	-	Exon	NM_006297	6.47264e-20	-72.7188
chr19	44079728	-	Exon	NM_006297	6.47264e-20	-72.7135
chr19	44079704	-	Exon	NM_006297	6.76911e-20	-72.7115
chr10	135342219	-	Intron	NM_000773	3.25018e-10	-72.7103
chr10	135342306	-	Intron	NM_000773	3.25018e-10	-72.7103
chr10	73360055	-	Intron	NM_001171930,NM_001171931,NM_001171932,NM_022124,NM_052836	3.39519e-09	-72.7095
chr12	124792359	-	Intron	NM_181709	2.14164e-09	-72.7024
chr10	27475997	-	-	-	1.62794e-16	-72.6862
chr19	47777588	+	Promoter	NM_178511	1.84807e-16	-72.6793
chr5	137911956	+	Promoter	NM_004134	6.71312e-22	-72.6667
chr19	2838629	+	-	-	7.1619e-15	-72.6642
chr14	54908412	+	Promoter	NM_005776	4.82103e-16	-72.658
chr14	101867302	-	-	-	6.52599e-09	-72.6486
chr13	113655538	+	Promoter	NM_024979	3.25723e-18	-72.6305
chr4	183721510	-	Exon	NM_001080477	1.31172e-17	-72.6118
chr2	190744152	+	-	-	2.83906e-06	-72.6099
chrX	153009999	+	Exon	NM_000033	1.07825e-28	-72.5962
chr9	140008779	-	Exon	NM_013379	4.58056e-23	-72.5953
chr20	34651553	+	-	-	6.62318e-13	-72.5907
chr7	132262413	-	Intron	NM_181775	1.3745e-05	-72.5504
chr5	166161901	+	-	-	3.76367e-12	-72.5484
chr14	20137381	-	-	-	1.60056e-38	-72.5394
chr14	92913803	-	Intron	NM_153646,NM_153647,NM_153648	4.04117e-09	-72.5336
chr2	182322279	+	Exon	NM_000885	6.13647e-11	-72.5289
chr18	76457601	-	-	-	6.66389e-53	-72.5236
chrX	153008434	+	Intron	NM_000033	1.2121e-32	-72.5232
chr17	21416435	-	-	-	0.000467834	-72.5146
chr17	21416411	-	-	-	0.000540063	-72.5146
chr13	110781895	-	-	-	1.18697e-14	-72.5105
chr2	182322274	+	Exon	NM_000885	5.2436e-11	-72.509
chr2	182322296	+	Exon	NM_000885	5.2436e-11	-72.509
chr2	182322379	+	Exon	NM_000885	5.2436e-11	-72.509
chr19	48125517	-	Intron	NM_015711	1.36968e-08	-72.5034
chr2	182322400	+	Exon	NM_000885	5.2436e-11	-72.5032
chr10	135342320	-	Intron	NM_000773	3.25018e-10	-72.5011
chr1	205289687	+	Intron	NM_030952	0.000388753	-72.5
chr12	6657575	+	-	-	6.47656e-09	-72.4778
chr19	815651	-	Intron	NM_001270366,NM_024888	8.17473e-18	-72.4772
chr4	39184129	+	Promoter	NM_025132	1.37314e-13	-72.4739
chr11	22647124	-	Exon	NM_022725	3.36009e-21	-72.4602
chr7	103630875	-	Promoter	NM_005045,NM_173054	1.52601e-08	-72.4234
chr20	56156334	+	-	-	1.73313e-18	-72.4202
chr7	132262354	-	Intron	NM_181775	1.66089e-05	-72.415
chr17	21416473	-	-	-	0.000531987	-72.4149
chr16	67233045	+	Exon	NM_024712	4.69687e-14	-72.4018
chr15	70178247	-	-	-	1.17272e-19	-72.3929
chr2	182322373	+	Exon	NM_000885	4.47576e-11	-72.376
chr9	135462068	-	Intron	NM_020064	4.59748e-13	-72.3536
chr19	44079735	-	Promoter	NM_006297	1.06694e-18	-72.3527
chr10	70677401	-	Intron	NM_024045	1.18092e-30	-72.3427
chr13	114467053	+	Intron	NM_182614	1.77402e-26	-72.3407
chr3	147113829	+	Exon	NM_001168378,NM_001168379,NM_032153	4.59012e-33	-72.3302
chr2	182322395	+	Exon	NM_000885	5.2436e-11	-72.3211
chr2	182322402	+	Exon	NM_000885	5.2436e-11	-72.316
chr10	13406365	+	-	-	2.04678e-05	-72.31
chr7	101513699	-	Intron	NM_181552	5.45562e-44	-72.3005
chr7	101899555	-	Intron	NM_001202544,NM_001202545,NM_001202546,NM_001913,NM_181500	1.08047e-07	-72.297
chr19	44079726	-	Exon	NM_006297	6.47264e-20	-72.2948
chr2	233283880	-	-	-	8.05343e-14	-72.2624
chr16	56681928	+	-	-	2.57021e-32	-72.2565
chr17	21416425	-	-	-	0.000532371	-72.2515
chr17	21416476	-	-	-	0.000532371	-72.2515
chr19	2251266	-	Exon	NM_000479	1.88669e-16	-72.2354
chr6	156817848	+	-	-	0.00213016	-72.2222
chr20	18036342	-	Intron	NM_021220	2.96244e-25	-72.2222
chr20	30206834	+	-	-	1.06034e-10	-72.2222
chr7	22894065	+	-	-	3.44377e-05	-72.2222
chr17	21416467	-	-	-	0.00046785	-72.2222
chr15	31508322	-	-	-	1.98974e-12	-72.2032
chr1	20728281	-	Intron	NR_033887	2.12636e-22	-72.1962
chr17	77246152	-	Intron	NM_001082575	4.5641e-26	-72.196
chr19	47777582	+	Promoter	NM_178511	5.11322e-17	-72.1899
chrX	153626159	-	Promoter	NM_001256577,NM_001256580,NM_006013	3.44023e-39	-72.1836
chr19	17347792	-	Intron	NM_005234	2.39845e-25	-72.149
chr1	201142821	+	-	-	0.000239408	-72.1448
chr5	1952640	+	-	-	5.72843e-20	-72.1372
chr1	94312385	+	Promoter	NM_001261408	2.23093e-16	-72.1243
chr12	131418492	+	-	-	0.000116459	-72.1144
chr2	206790736	+	-	-	1.12199e-08	-72.1113
chr16	67254398	-	Intron	NM_001004055,NM_012163	1.56652e-22	-72.1084
chr21	47010072	-	-	-	6.15168e-20	-72.1003
chr19	20844199	-	Promoter	NM_001076675,NM_145297	5.04497e-11	-72.0915
chr10	135342302	-	Intron	NM_000773	3.25018e-10	-72.0827
chrX	118369874	-	Promoter	NM_006667	2.42441e-23	-72.0772
chr18	56098677	-	-	-	3.81291e-51	-72.0697
chr19	13043811	+	Promoter	NM_004461	1.25977e-26	-72.0684
chr6	12262826	+	-	-	1.49608e-10	-72.0609
chr11	130887896	-	-	-	9.64271e-08	-72.047
chr5	137911915	+	Promoter	NM_004134	2.93249e-21	-72.0396
chr17	65487463	-	Intron	NM_012417,NM_181671	5.08621e-26	-72.038
chr4	186392589	+	Promoter	NM_001145411,NM_152775	3.4026e-14	-72.0232
chr14	35842800	+	-	-	3.64893e-10	-72.0136
chr9	135462033	-	Intron	NM_020064	4.59748e-13	-72.0083
chr21	47028952	+	-	-	3.59332e-13	-72.0028
chr4	41992447	+	Promoter	NM_006345	1.12745e-15	-71.9852
chr17	40936462	+	Exon	NM_032387	0.000111158	-71.9718
chr9	135461944	-	Intron	NM_020064	5.19726e-13	-71.9715
chr10	27154170	+	-	-	1.27658e-18	-71.9706
chr10	26235664	+	Intron	NM_017433	1.98882e-18	-71.9614
chr18	61604460	-	-	-	4.66677e-24	-71.9612
chr3	154337499	+	-	-	2.9826e-18	-71.9542
chr19	32896957	+	Promoter	NM_001172774	0.00114333	-71.9424
chr16	14514970	+	-	-	3.35937e-05	-71.9405
chr9	135461936	-	Intron	NM_020064	4.59748e-13	-71.931
chrX	34124102	+	-	-	7.21705e-36	-71.9246
chr14	69076791	-	-	-	1.26062e-36	-71.9094
chr19	47777651	+	Promoter	NM_178511	5.43859e-16	-71.909
chr8	28929128	-	Intron	NM_015254	1.05605e-11	-71.8989
chrX	31746393	+	Intron	NM_000109,NM_004006,NM_004007,NM_004009,NM_004010,NM_004011,NM_004012,NM_004013,NM_004020,NM_004021,NM_004022,NM_004023	2.56313e-05	-71.8897
chr11	61276649	+	Exon	NM_001145077	6.14186e-23	-71.8839
chr7	153749662	-	Promoter	NM_130797	1.81642e-05	-71.8681
chr19	47777584	+	Promoter	NM_178511	5.42733e-17	-71.8631
chr10	135342222	-	Intron	NM_000773	2.60804e-10	-71.8607
chr12	96794238	-	Exon	NM_001170464,NM_002595	1.21277e-14	-71.8475
chr1	63788344	+	Promoter	NM_012183	1.10783e-11	-71.841
chr5	69673288	+	-	-	0.00344704	-71.8182
chr3	47321733	+	Intron	NM_022342,NM_182902	1.93117e-14	-71.8178
chr9	135461915	-	Intron	NM_020064	5.19726e-13	-71.8114
chr1	212781651	-	Promoter	NM_001040619,NM_001206484,NM_001206488,NM_001674	4.22749e-08	-71.8017
chr9	132312085	-	-	-	3.22832e-09	-71.797
chr9	135462065	-	Intron	NM_020064	4.59748e-13	-71.7902
chr3	192348643	-	Intron	NM_004113	2.13079e-06	-71.788
chr17	67417976	-	Intron	NM_002758	0.000249538	-71.7855
chr9	135462072	-	Intron	NM_020064	3.94472e-13	-71.7638
chr9	135462046	-	Intron	NM_020064	4.59748e-13	-71.7499
chr1	42127437	-	Intron	NM_024503	4.20596e-06	-71.7427
chr12	73987145	-	-	-	7.26895e-29	-71.736
chr6	35899148	+	-	-	1.71574e-05	-71.7304
chr12	132699678	-	Intron	NM_001122636	6.42526e-10	-71.7262
chr19	2306518	+	Intron	NM_001101391	1.31906e-26	-71.6837
chr1	89768851	+	-	-	2.50657e-15	-71.683
chr12	53628244	+	-	-	1.14389e-22	-71.6734
chr21	17046329	+	-	-	8.79124e-18	-71.6311
chr7	132262419	-	Intron	NM_181775	1.61388e-05	-71.6298
chr5	3200293	-	-	-	2.18848e-43	-71.6164
chr10	111971156	+	Intron	NM_130439	3.84261e-27	-71.6027
chr17	3584819	-	Intron	NM_001204519,NM_001204520,NM_002561,NM_175080,NR_037928	1.38996e-09	-71.5985
chr2	26785243	-	Promoter	NM_001105519	8.60658e-48	-71.5927
chr14	24238758	-	-	-	1.41117e-05	-71.5881
chr13	103789222	-	-	-	5.85271e-38	-71.5812
chr7	132262429	-	Intron	NM_181775	1.61388e-05	-71.5804
chr4	640426	-	Intron	NM_000283,NM_001145291	8.99841e-15	-71.5731
chr15	90233311	+	Promoter	NM_001271572,NM_001271573,NM_003847	3.01654e-15	-71.5685
chr1	201017911	+	Intron	NM_000069	6.70705e-47	-71.5683
chr3	57604814	+	-	-	0.00363631	-71.5613
chr2	206790769	+	-	-	1.77434e-08	-71.5533
chr1	17319060	-	-	-	9.23781e-13	-71.5514
chr19	46916415	-	Exon	NM_032040	5.96556e-13	-71.5337
chr3	125899067	+	Exon	NR_046383	5.97292e-20	-71.5298
chr19	30864903	+	Intron	NM_014717	2.85713e-06	-71.5278
chr12	69783086	+	Intron	NM_006530	2.41197e-10	-71.4846
chr19	7957253	-	Intron	NM_025061	1.32908e-06	-71.4774
chr1	206223169	-	-	-	5.32025e-31	-71.4567
chr2	206790750	+	-	-	1.77434e-08	-71.4525
chr1	245319238	+	Promoter	NM_018012	0.000450065	-71.4377
chr17	78943338	-	-	-	1.15349e-05	-71.4302
chr10	134567313	+	Intron	NM_005539	1.46229e-19	-71.4286
chr15	45771052	+	-	-	4.01487e-10	-71.4286
chr9	130639612	-	Promoter	NM_000476	9.15927e-06	-71.4107
chr10	134043473	-	Intron	NM_173575	2.56422e-15	-71.4069
chr7	97390065	+	-	-	4.8506e-15	-71.3933
chrX	9603111	-	Intron	NM_001139468	3.74502e-05	-71.3801
chr9	88420760	+	Promoter	NR_029410	6.20456e-16	-71.3738
chr1	1003888	+	-	-	6.98354e-15	-71.3688
chrX	70373312	-	Intron	NM_181303	1.1075e-25	-71.3333
chr2	206750505	-	-	-	7.62409e-08	-71.332
chr7	132262362	-	Intron	NM_181775	1.66089e-05	-71.328
chr20	62427628	+	Intron	NM_025224	5.14559e-15	-71.3231
chr5	179581364	-	Intron	NM_175062	7.36219e-17	-71.3117
chrX	31746332	+	Intron	NM_000109,NM_004006,NM_004007,NM_004009,NM_004010,NM_004011,NM_004012,NM_004013,NM_004020,NM_004021,NM_004022,NM_004023	5.88658e-05	-71.3101
chr19	40938985	-	-	-	7.13339e-09	-71.3061
chr20	2321314	-	-	-	3.15548e-14	-71.3016
chr2	20870211	+	Intron	NM_182828	1.21791e-11	-71.2959
chr7	44026212	-	-	-	3.88521e-53	-71.2945
chr5	140768230	+	Exon	NM_003736	0.000206346	-71.293
chr19	47777641	+	Promoter	NM_178511	2.32401e-16	-71.279
chr2	96606065	+	-	-	5.49835e-07	-71.2618
chr17	78819058	+	Intron	NM_001163034,NM_020761	1.90996e-08	-71.2563
chr10	135342335	-	Intron	NM_000773	3.25018e-10	-71.2458
chr11	22647221	-	Exon	NM_022725	2.49141e-23	-71.2456
chr10	127879853	-	Intron	NM_003474,NM_021641	6.07377e-24	-71.2333
chr7	23054198	-	Promoter	NM_032581	9.98092e-28	-71.2158
chr2	206790719	+	-	-	1.77434e-08	-71.1857
chr2	206790725	+	-	-	1.77434e-08	-71.1857
chr10	111971188	+	Intron	NM_130439	6.85091e-27	-71.1696
chr11	725716	+	Intron	NM_022772	1.37451e-20	-71.1665
chr1	226496265	+	Promoter	NM_001270409,NM_173083	6.50392e-08	-71.1656
chrX	107019196	-	Promoter	NM_198057	1.23138e-13	-71.1621
chr22	24093609	+	Promoter	NM_021916	1.23387e-21	-71.154
chr3	49622825	-	Intron	NM_003458	8.25187e-34	-71.1278
chr20	32450682	+	-	-	6.47294e-25	-71.1224
chr4	3591926	-	Exon	NR_040045	1.35272e-58	-71.1155
chr9	138615671	-	Intron	NM_020822	5.88312e-12	-71.1096
chr22	36783823	-	Promoter	NM_002473	9.24781e-17	-71.1075
chr19	47777555	+	Promoter	NM_178511	1.78569e-16	-71.0818
chr19	47777566	+	Promoter	NM_178511	1.78569e-16	-71.0818
chr19	47777586	+	Promoter	NM_178511	1.78569e-16	-71.0818
chr19	47777649	+	Promoter	NM_178511	1.78569e-16	-71.0818
chr19	47777676	+	Exon	NR_037675	1.78569e-16	-71.0818
chr6	42928260	+	Promoter	NM_018960	1.13736e-11	-71.0771
chr11	71934277	-	-	-	1.12734e-17	-71.0543
chr6	151644438	+	Intron	NM_005100	1.8332e-05	-71.0526
chr2	129037710	+	Intron	NM_004807	0.00123797	-71.0416
chrX	23766409	+	-	-	2.05766e-11	-71.0242
chr3	191171197	+	-	-	1.44231e-09	-71.0125
chr14	58861680	+	Promoter	NM_207377	3.14362e-05	-71.002
chr10	135017018	-	Intron	NM_152643	4.77373e-36	-70.9882
chr19	47777540	+	Promoter	NM_178511	1.30165e-14	-70.9867
chr17	7967103	-	-	-	2.38473e-06	-70.9828
chr15	65722609	-	-	-	1.23528e-07	-70.979
chr11	96074939	-	Exon	NM_032427	4.18641e-14	-70.9781
chr19	47777685	+	Exon	NR_037675	4.02563e-13	-70.9713
chr10	52834068	-	Promoter	NM_006258	0.000181779	-70.9614
chr11	22647218	-	Exon	NM_022725	1.99472e-23	-70.9606
chr17	75450101	-	Intron	NM_001113496	1.8626e-22	-70.9554
chr15	77919597	-	Intron	NM_032808	9.33233e-17	-70.9428
chr11	22647233	-	Exon	NM_022725	7.76401e-24	-70.936
chr11	22647244	-	Exon	NM_022725	7.37852e-23	-70.9272
chr4	8861633	-	-	-	1.65776e-34	-70.9118
chr12	122517297	-	Promoter	NM_014938	4.11289e-12	-70.9095
chr1	9795341	-	Intron	NM_001009566,NM_014944	2.19303e-14	-70.8955
chr15	77919754	-	Intron	NM_032808	5.13445e-17	-70.8875
chr2	232572640	+	Promoter	NM_001099285,NM_002823	2.08172e-39	-70.8866
chr20	44650401	+	Exon	NM_001134771	3.61502e-10	-70.8706
chr20	60898524	+	Exon	NM_005560	2.71306e-07	-70.8577
chr17	1658947	+	-	-	2.47616e-07	-70.8515
chr11	725739	+	Exon	NM_022772	1.37451e-20	-70.8406
chr9	139705240	-	Intron	NM_001173988,NM_001173989,NM_024718	1.61287e-05	-70.8333
chr11	101969425	+	-	-	0.000268673	-70.8333
chr5	1881164	+	Intron	NM_016358	1.41336e-05	-70.8297
chr5	1881166	+	Intron	NM_016358	1.41336e-05	-70.8297
chr14	77499307	+	-	-	1.58616e-06	-70.8283
chr10	111971095	+	Intron	NM_130439	6.15596e-27	-70.8273
chr13	113655515	+	Promoter	NM_024979	6.89273e-17	-70.8258
chr13	103755822	+	-	-	1.28692e-24	-70.8192
chr5	137369075	+	Promoter	NM_001101800,NM_001101801,NM_016603	1.91329e-19	-70.8182
chr2	206790788	+	-	-	1.77434e-08	-70.818
chr2	27273344	-	-	-	1.411e-31	-70.8173
chr19	11591302	-	Promoter	NM_001420,NM_032281	0.00275521	-70.813
chr20	44650440	+	Exon	NM_001134771	2.64113e-10	-70.8091
chr11	22647137	-	Exon	NM_022725	9.03615e-24	-70.805
chr11	22647147	-	Exon	NM_022725	1.13102e-23	-70.7964
chr11	725662	+	Intron	NM_022772	1.37451e-20	-70.7858
chr16	23766978	-	Intron	NM_022097	7.61705e-23	-70.78
chr19	2457232	+	Promoter	NM_032737	7.67788e-07	-70.7792
chr16	980619	+	Intron	NR_033645,NR_033646	2.36672e-14	-70.7692
chr11	22647242	-	Exon	NM_022725	9.03615e-24	-70.7586
chr19	44079751	-	Promoter	NM_006297	6.47264e-20	-70.7555
chr4	37839596	-	Intron	NM_018290	3.78368e-17	-70.7282
chr20	32067095	+	-	-	1.75303e-13	-70.7135
chr7	40174511	+	Promoter	NM_001193311,NM_001193312,NM_001193313,NM_024728	8.6213e-05	-70.7123
chr11	1968580	-	Exon	NM_021134	3.14306e-36	-70.7041
chr10	12633387	-	Intron	NM_020397,NM_153498	5.83177e-08	-70.6956
chr11	128463349	-	-	-	3.02649e-15	-70.6948
chr16	86100423	+	-	-	1.57832e-34	-70.6873
chrX	18931004	+	Intron	NM_000292	2.32157e-23	-70.6864
chr11	725659	+	Intron	NM_022772	1.37451e-20	-70.6822
chr11	725718	+	Intron	NM_022772	1.37451e-20	-70.6822
chr13	76250551	+	Intron	NM_005358	2.15944e-11	-70.6757
chr12	53628141	+	-	-	1.39668e-20	-70.6402
chr7	158768253	+	-	-	1.67086e-09	-70.6169
chr18	22072681	+	-	-	5.38925e-07	-70.6096
chr12	53628157	+	-	-	2.59628e-20	-70.5959
chr19	57477895	+	-	-	1.54641e-05	-70.5901
chr9	128734395	-	-	-	5.04034e-05	-70.5882
chr8	145137609	+	Exon	NM_003801	2.98597e-29	-70.5668
chr3	129346819	-	-	-	0.000392909	-70.5641
chr17	1521312	+	Intron	NM_152346	1.59106e-21	-70.5584
chr1	53309153	-	Promoter	NM_001004339	2.39529e-12	-70.554
chr2	242689759	+	Intron	NM_152783	4.04465e-08	-70.5521
chr19	2427767	+	Exon	NM_012458	5.86452e-17	-70.5497
chr9	20620692	+	-	-	4.57685e-18	-70.5462
chr2	87883564	-	-	-	4.84528e-06	-70.5435
chr9	139415719	-	Intron	NM_017617	3.41518e-05	-70.5422
chr6	151644456	+	Intron	NM_005100	1.8332e-05	-70.5357
chr14	100680893	-	-	-	4.2201e-22	-70.5342
chr16	89490449	+	Intron	NM_001256183,NM_013275,NR_045839	4.03187e-12	-70.5304
chr2	87883674	-	-	-	4.85164e-06	-70.5282
chr9	13296063	+	-	-	7.09763e-21	-70.4973
chr20	44650411	+	Exon	NM_001134771	2.53282e-10	-70.4949
chr1	89323958	+	Intron	NM_001514	5.14586e-05	-70.4909
chr8	145137617	+	Exon	NM_003801	1.58837e-29	-70.4725
chr16	88744697	-	Exon	NM_178310	5.8402e-16	-70.4724
chr8	143254645	+	-	-	9.48334e-14	-70.4678
chr11	725639	+	Intron	NM_022772	1.37451e-20	-70.4667
chr11	725713	+	Intron	NM_022772	1.37451e-20	-70.4667
chr7	148787617	-	Promoter	NM_152411	4.25604e-34	-70.4613
chr4	184117775	+	Intron	NM_024949	3.19304e-08	-70.4596
chr20	44650378	+	Exon	NM_001134771	3.89231e-10	-70.4594
chr11	725743	+	Exon	NM_022772	1.05215e-15	-70.4354
chr6	10417578	-	Intron	NM_001042425	0.0014247	-70.4285
chr20	54934364	-	Promoter	NM_080821	2.64659e-13	-70.4284
chr11	67808402	+	Intron	NM_006019	7.08192e-20	-70.4159
chr2	174828720	+	Exon	NM_001017371	4.22347e-07	-70.4159
chr14	35379486	+	-	-	2.44618e-08	-70.4102
chr8	97157729	-	Exon	NM_001001557	1.29144e-39	-70.4088
chr16	85030968	-	Intron	NM_001145548,NM_017740	0.00162763	-70.4044
chr14	100680756	-	-	-	5.64995e-22	-70.4023
chr14	100680865	-	-	-	5.64995e-22	-70.4023
chr14	100680867	-	-	-	5.64995e-22	-70.4023
chr14	100680876	-	-	-	5.64995e-22	-70.4023
chr17	28972478	+	-	-	6.5331e-05	-70.3934
chr8	145137584	+	Exon	NM_003801	2.98755e-29	-70.3737
chr8	145137615	+	Exon	NM_003801	2.98755e-29	-70.3737
chr1	95392514	-	Exon	NM_001839	2.72483e-18	-70.3689
chr1	78225090	-	Promoter	NM_015017,NM_201624,NM_201626	3.93896e-05	-70.3657
chr20	44650430	+	Exon	NM_001134771	4.34353e-10	-70.3633
chr5	1881112	+	Intron	NM_016358	1.41336e-05	-70.3552
chr13	28696771	-	-	-	7.48544e-12	-70.3526
chr1	95392654	-	Exon	NM_001839	3.09716e-19	-70.3471
chr19	47777653	+	Promoter	NM_178511	6.1789e-15	-70.3465
chr19	39954914	+	Intron	NM_001111020,NM_001130824,NM_001130825,NM_003169	5.27484e-21	-70.339
chr1	95392537	-	Exon	NM_001839	2.52154e-18	-70.3201
chr19	1482648	-	Intron	NM_017573	3.13522e-18	-70.3124
chr7	148787619	-	Promoter	NM_152411	9.40161e-34	-70.3073
chr5	180100596	+	-	-	3.49637e-05	-70.3046
chr7	100508553	-	-	-	4.12326e-12	-70.2898
chr6	137815263	+	Exon	NM_175747	2.53425e-14	-70.2892
chr1	1002689	-	-	-	8.10407e-21	-70.2816
chr8	145137647	+	Exon	NM_003801	1.59221e-29	-70.2795
chr1	201684017	+	Intron	NM_020443	1.11743e-22	-70.2748
chr8	145137579	+	Exon	NM_003801	3.52027e-29	-70.2733
chr9	68409131	-	-	-	3.8943e-11	-70.2683
chr12	121028381	+	-	-	4.74764e-55	-70.2633
chr8	145137550	+	Exon	NM_003801	2.98333e-29	-70.26
chr1	40506021	-	Promoter	NM_001105530,NM_006367	1.67728e-10	-70.2587
chr1	5831397	+	-	-	1.36875e-09	-70.2412
chr20	44650449	+	Exon	NM_001134771	3.42188e-10	-70.2238
chr4	152956084	-	-	-	4.34466e-14	-70.2227
chr11	119783344	+	-	-	2.08416e-19	-70.2141
chr18	43418405	-	Intron	NM_213602	2.66119e-15	-70.2044
chr8	145118880	-	-	-	8.25827e-08	-70.2005
chr12	53628227	+	-	-	2.24468e-20	-70.1971
chr7	148787645	-	Promoter	NM_152411	9.40167e-34	-70.1773
chr7	148787649	-	Promoter	NM_152411	9.40167e-34	-70.1773
chr20	44650384	+	Exon	NM_001134771	3.61502e-10	-70.1762
chr16	85369036	+	-	-	4.12091e-09	-70.1746
chr5	166851183	-	Intron	NM_001122679	5.12581e-40	-70.174
chr8	145137581	+	Exon	NM_003801	8.39803e-29	-70.1737
chr2	189020691	-	-	-	3.35077e-05	-70.1611
chr20	54934370	-	Promoter	NM_080821	2.45966e-13	-70.1591
chr20	54934469	-	Promoter	NM_080821	2.45966e-13	-70.1591
chr20	54934495	-	Promoter	NM_080821	2.45966e-13	-70.1591
chr7	148787629	-	Promoter	NM_152411	9.40194e-34	-70.1537
chr1	54980158	+	-	-	3.1427e-13	-70.1466
chrX	139014803	-	-	-	6.40314e-13	-70.1383
chr18	77748708	-	Promoter	NM_006701	1.55231e-40	-70.1267
chr1	95392506	-	Exon	NM_001839	2.72483e-18	-70.1262
chr16	1954585	-	-	-	6.9866e-23	-70.1245
chr20	44650380	+	Exon	NM_001134771	3.89231e-10	-70.1073
chr20	44650474	+	Exon	NM_001134771	3.89231e-10	-70.1073
chr21	46192069	+	Intron	NM_001202489,NM_003343,NM_182688	1.17021e-18	-70.0994
chr2	87883548	-	-	-	3.70268e-06	-70.0925
chr5	124712143	+	-	-	9.89352e-27	-70.0908
chr8	81288305	+	-	-	0.00395883	-70.0903
chr3	138634409	-	-	-	1.04126e-13	-70.0793
chr5	1623268	-	Intron	NR_003713	1.95584e-38	-70.0755
chr8	145137597	+	Exon	NM_003801	1.02684e-28	-70.0733
chr3	125090764	+	Intron	NM_021964	2.67986e-12	-70.0615
chr20	54934486	-	Promoter	NM_080821	3.16079e-13	-70.0608
chr7	148787610	-	Promoter	NM_152411	1.68724e-34	-70.06
chr10	86350445	-	-	-	8.5152e-15	-70.0545
chr2	231779147	+	Intron	NM_005683	4.73286e-31	-70.0491
chr19	51692080	+	-	-	8.80705e-24	-70.0489
chr4	48343879	+	Exon	NM_020846	8.14958e-07	-70.0472
chr2	132877121	-	-	-	1.15754e-17	-70.0446
chr5	140256791	+	Exon	NM_018903	3.61538e-05	-70.0414
chr15	69111791	-	Intron	NM_006305	4.1691e-33	-70.0345
chr4	89680404	+	Intron	NM_001015045,NM_001265578,NM_001265579,NM_001265580,NM_014883	1.29154e-22	-70.0337
chr17	21751946	-	-	-	1.21504e-16	-70.0335
chr9	132103603	-	-	-	1.50826e-10	-70.0315
chr1	95392649	-	Exon	NM_001839	3.21201e-18	-70.0303
chr3	129346824	-	-	-	0.000412852	-70.0294
chr19	34372088	+	-	-	0.00010776	-70.0198
chr11	82944818	-	Intron	NM_182603	1.29703e-11	-70.0191
chr20	31172516	-	Exon	NM_001256798	2.92363e-32	-70.0159
chr19	2588470	-	Intron	NM_052847	2.69202e-10	-70.0128
chrX	153061637	+	Intron	NR_037927	1.82881e-08	-70
chr11	74952871	-	Exon	NM_001195528	7.32542e-05	-70
chr7	148787601	-	Promoter	NM_152411	2.39623e-33	-69.9941
chr12	108070413	-	-	-	6.46192e-08	-69.9914
chr19	47777665	+	Exon	NR_037675	6.18837e-15	-69.9853
chr7	7417871	+	Intron	NM_001037763	4.86406e-12	-69.9846
chr2	28484501	-	Intron	NM_001261840,NM_004899,NM_199191,NM_199192,NM_199193,NM_199194	3.22368e-09	-69.9834
chr20	54934484	-	Promoter	NM_080821	2.45966e-13	-69.9739
chr17	21416492	-	-	-	0.00053742	-69.9486
chr1	5831403	+	-	-	8.70886e-10	-69.9364
chr20	61435878	+	Promoter	NM_007346	2.39824e-09	-69.9278
chr20	61435892	+	Promoter	NM_007346	2.39824e-09	-69.9278
chr20	61435949	+	Promoter	NM_007346	2.39824e-09	-69.9278
chr15	63767360	+	-	-	1.2416e-07	-69.9251
chr16	3003977	-	-	-	4.86618e-08	-69.9227
chr6	100905493	-	Intron	NM_005068	0.00349414	-69.9105
chr12	8398289	-	-	-	5.02243e-06	-69.9081
chr2	206790703	+	-	-	1.77434e-08	-69.9036
chr3	138634449	-	-	-	1.04126e-13	-69.8997
chr20	32450571	+	-	-	4.88265e-37	-69.899
chr22	45125992	-	Intron	NM_181334	1.79065e-09	-69.898
chr17	48178515	-	Intron	NM_001199898,NM_001199899,NM_001199900,NM_002611	4.22385e-06	-69.8911
chr16	3314048	-	Exon	NR_033904	5.71347e-19	-69.8874
chr1	209405736	-	-	-	1.12286e-07	-69.8852
chr12	53628210	+	-	-	4.78957e-19	-69.8836
chr1	95392642	-	Exon	NM_001839	5.00357e-18	-69.8825
chr9	106332815	-	-	-	7.17614e-37	-69.8819
chr11	118479396	-	Intron	NM_015157	1.67704e-08	-69.8807
chr12	53628207	+	-	-	5.38985e-19	-69.8785
chr7	128555677	-	-	-	6.48278e-10	-69.8783
chr8	145137620	+	Exon	NM_003801	1.99416e-27	-69.8733
chr8	145137630	+	Exon	NM_003801	1.99416e-27	-69.8733
chr11	725723	+	Intron	NM_022772	1.14476e-19	-69.8672
chr3	128151983	+	-	-	1.49061e-05	-69.8586
chr12	33592102	-	Promoter	NM_198992	0.0016443	-69.8551
chr11	71202780	-	Intron	NM_018161	3.43608e-19	-69.8509
chr22	29539501	+	Exon	NM_001039570	0.000427654	-69.8508
chr19	46916461	-	Exon	NM_032040	2.67918e-13	-69.8424
chr3	138634431	-	-	-	7.3693e-14	-69.8341
chr17	19429525	+	-	-	2.74236e-18	-69.831
chr20	48807451	+	Exon	NM_005194	2.03025e-08	-69.8227
chr17	78161739	-	Promoter	NM_052819	4.91201e-14	-69.8166
chr8	145137653	+	Exon	NM_003801	1.81169e-21	-69.8126
chr3	5161711	+	-	-	5.89365e-06	-69.8048
chr4	27769889	+	-	-	2.10916e-21	-69.8021
chr1	19600257	-	Promoter	NR_040288,NR_040289	0.000279781	-69.7942
chr14	100680764	-	-	-	1.38186e-20	-69.7854
chr17	43221203	-	Exon	NM_001135704,NM_001135705,NM_001135706,NM_024722	0.000186985	-69.7826
chr5	118691652	+	Exon	NM_014350	7.08305e-05	-69.7762
chr3	138634474	-	-	-	8.60545e-06	-69.7759
chr20	61435954	+	Promoter	NM_007346	2.60141e-09	-69.7717
chr1	95392499	-	Exon	NM_001839	3.21201e-18	-69.755
chr5	175224714	+	Intron	NM_006650	0.000436332	-69.7514
chr12	122461883	-	Intron	NM_001024808,NM_020993	0.00113522	-69.743
chr12	130590156	-	-	-	1.96734e-10	-69.7279
chr6	26008790	+	-	-	2.28268e-16	-69.7278
chr9	101761597	+	Intron	NM_001855	1.177e-05	-69.7257
chr2	237086876	-	-	-	4.09711e-18	-69.7161
chr16	28234756	-	-	-	0.00224838	-69.711
chr19	1562116	+	Intron	NM_001174118,NM_203304	1.0134e-10	-69.7085
chr2	95953290	-	Intron	NM_001165977,NM_001165978,NM_144707	1.02344e-12	-69.697
chr1	3207419	+	Intron	NM_022114,NM_199454	0.000247359	-69.6927
chr11	61292942	-	Intron	NM_001252065,NM_004200	1.2209e-07	-69.6684
chr21	21343153	-	-	-	4.40207e-06	-69.6645
chr2	14349187	-	-	-	5.43257e-10	-69.6449
chr8	70310503	-	-	-	1.87799e-09	-69.6442
chr22	28017586	+	-	-	1.40096e-33	-69.6437
chr20	61435964	+	Promoter	NM_007346	2.39824e-09	-69.6247
chr22	24951306	-	Promoter	NM_004175	6.96713e-08	-69.6126
chr12	66743084	+	-	-	1.64384e-11	-69.6117
chr6	75914762	+	Promoter	NM_004370,NM_080645	2.08726e-25	-69.6115
chr6	75914803	+	Promoter	NM_004370,NM_080645	2.08726e-25	-69.6115
chr6	75914808	+	Promoter	NM_004370,NM_080645	2.08726e-25	-69.6115
chr6	75914826	+	Promoter	NM_004370,NM_080645	2.08726e-25	-69.6115
chr3	138634390	-	-	-	1.04126e-13	-69.5891
chr3	138634399	-	-	-	1.04126e-13	-69.5891
chr3	138634425	-	-	-	1.04126e-13	-69.5891
[truncated: 8,894 more rows]

## Sheet: 10 weeks PC right
Asymmetrically methylated CpG sites in the right spinal cord at 10 weeks PC
Chr	Position	Strand	Feature	GeneID	p value	mean methylation difference
chr8	116404455	+	-	-	6.2899e-82	100
chr7	33176811	+	Intron	NM_001033604,NM_001033605,NM_014451,NM_198428	6.29391e-58	100
chr17	78999726	-	-	-	1.40858e-57	100
chr1	17258827	+	Intron	NM_014675	2.50645e-53	100
chr22	43045842	-	Promoter	NM_000398	8.62001e-53	100
chr7	146962702	+	Intron	NM_014141	7.64475e-51	100
chr1	30480478	-	-	-	1.39682e-49	100
chrX	82695348	+	-	-	2.24999e-44	100
chr17	76973887	+	Intron	NM_005567	1.2354e-43	100
chr19	6210785	-	Exon	NM_005934	3.05025e-42	100
chr9	135521307	+	-	-	1.61608e-39	100
chr4	152600383	+	Intron	NM_004564	1.73168e-39	100
chrX	44484910	-	-	-	3.78255e-38	100
chr2	45203143	+	-	-	4.0951e-36	100
chr2	20840808	+	-	-	2.56189e-31	100
chr13	96431674	-	Intron	NM_006260	2.14106e-30	100
chr19	45657659	+	Intron	NM_198478	1.09687e-29	100
chr18	51470871	-	-	-	1.93196e-29	100
chr19	3783785	+	Intron	NM_002378,NM_139354,NM_139355	2.44224e-29	100
chr1	10718539	+	-	-	7.88155e-27	100
chr1	33439608	-	-	-	2.41929e-26	100
chr11	70376497	+	Intron	NM_012309,NM_133266	4.02309e-25	100
chr2	98348363	-	Intron	NM_001079	4.38074e-25	100
chr8	49702384	-	-	-	4.30666e-23	100
chr6	43013797	-	-	-	4.35105e-21	100
chr6	163558644	-	Intron	NM_152410	5.86338e-21	100
chr6	43013941	-	-	-	1.26136e-20	100
chr9	138999332	-	-	-	2.9447e-19	100
chr20	61838549	-	Intron	NM_017798	2.9447e-19	100
chr5	55313495	-	-	-	4.58197e-19	100
chr19	7584361	+	Exon	NM_018083	3.49316e-18	100
chr14	103576554	+	Exon	NM_001077594	1.57935e-17	100
chr11	132031649	-	Intron	NM_001048209,NM_001144058,NM_001144059,NM_016522	7.44043e-17	100
chr11	132031657	-	Intron	NM_001048209,NM_001144058,NM_001144059,NM_016522	7.44043e-17	100
chr11	69064742	-	Exon	NM_138768	2.14964e-16	100
chr7	155567801	-	-	-	3.05423e-15	100
chr19	18888472	+	Exon	NM_001098482,NM_015321	3.25094e-14	100
chr9	140249702	-	Intron	NM_017820	3.26244e-14	100
chr5	1100210	-	Intron	NM_006598	7.0522e-14	100
chr5	1100215	-	Intron	NM_006598	7.0522e-14	100
chr5	10249151	-	Promoter	NM_001258388,NM_001258389,NM_199133,NR_047668,NR_047669,NR_047670	2.65867e-13	100
chr16	26761469	-	-	-	1.69278e-11	100
chr2	241387655	+	Intron	NM_002081	2.27749e-09	100
chr9	126859462	+	-	-	2.34412e-09	100
chr16	11200886	-	Intron	NM_001243403,NM_015226	2.5749e-09	100
chr21	44563160	+	-	-	3.59313e-09	100
chr19	1112432	+	-	-	1.51795e-08	100
chr2	240167914	-	Intron	NM_006037	1.94774e-07	100
chrX	19856782	-	Intron	NM_031892	2.22152e-07	100
chr2	106376813	+	Intron	NM_001004722,NM_003581	3.18064e-07	100
chr16	84762214	+	Intron	NM_005153	1.18163e-06	100
chrX	48913885	+	-	-	2.30012e-05	100
chrX	48913895	+	-	-	2.30012e-05	100
chrX	48913883	+	-	-	2.64458e-05	100
chr11	69580593	-	-	-	4.56668e-05	100
chr5	178548824	-	Intron	NM_014244	4.65398e-05	100
chr5	178548701	-	Exon	NM_014244	4.65398e-05	100
chr5	178420994	+	Intron	NM_000843	6.53979e-05	100
chr2	29247610	+	Intron	NM_199280	0.000139488	100
chr5	163677785	+	-	-	0.000199084	100
chr5	159400078	+	-	-	0.00412257	100
chr16	3624321	-	Intron	NM_178844	7.308e-82	99.8938
chr22	48728734	-	-	-	4.52638e-24	99.8551
chr22	40060144	-	-	-	4.39659e-25	99.8503
chr1	33439602	-	-	-	2.41929e-26	99.8175
chr9	135521322	+	-	-	3.59281e-38	99.789
chr21	36225287	-	Intron	NM_001001890,NM_001122607,NM_001754	3.97218e-54	99.7788
chr8	130838435	-	-	-	4.40553e-29	99.7512
chr16	87818113	+	-	-	0.000258006	99.7375
chrX	43338067	-	-	-	1.17426e-06	99.7326
chrX	39537951	-	-	-	5.91442e-20	99.7059
chr5	114193771	+	-	-	1.97032e-67	99.7024
chr19	13215451	+	-	-	3.12056e-09	99.7006
chr9	129281483	-	-	-	1.87257e-14	99.6914
chr1	18964401	-	Intron	NM_001135254,NM_002584,NM_013945	3.19563e-69	99.6711
chr22	37734256	-	-	-	1.25208e-26	99.6622
chr19	55500576	-	Intron	NM_001174081,NM_001174082,NM_001174083,NM_017852	9.34664e-85	99.6599
chr16	14542099	-	Intron	NM_001134477,NM_001242992,NM_002582	6.54769e-09	99.6212
chr12	91507692	-	-	-	3.60532e-57	99.6157
chr1	13855420	+	-	-	4.88487e-06	99.6154
chr2	239476305	+	-	-	6.93149e-10	99.6032
chr1	10802850	-	Intron	NM_001079843,NM_017766	9.59141e-22	99.5968
chr16	835944	+	Exon	NM_058192	2.43118e-81	99.5763
chr2	20840789	+	-	-	9.47835e-30	99.5455
chr11	7695663	+	Promoter	NM_016229	1.53797e-16	99.537
chr22	19706173	+	Exon	NM_001009939	1.18685e-90	99.5192
chr8	145742145	+	-	-	1.99926e-33	99.4737
chr11	2935520	+	Intron	NM_002555,NM_183233	4.21837e-67	99.4629
chr2	118617498	-	-	-	5.17924e-35	99.4505
chr11	63856695	+	Intron	NM_014067	1.08584e-10	99.4475
chr11	63856697	+	Intron	NM_014067	1.08584e-10	99.4475
chr10	88702167	-	Exon	NM_024756	1.45975e-31	99.4387
chr5	176502123	+	-	-	3.83572e-32	99.4318
chr21	43634668	+	Intron	NM_207628	4.90694e-22	99.4318
chr8	6160728	-	-	-	0.00017077	99.3976
chr16	1181690	+	-	-	1.39435e-50	99.3506
chrX	39817335	+	-	-	3.15613e-51	99.3243
chr7	157604915	+	Intron	NM_002847,NM_130842,NM_130843	5.01294e-18	99.3151
chr12	133161180	-	Exon	NM_001142641	1.95441e-12	99.3056
chr1	16441471	-	-	-	1.10536e-67	99.187
chr19	34391459	-	-	-	1.21439e-10	99.1667
chr16	67589012	-	-	-	7.74813e-07	99.1429
chr11	22785999	+	Intron	NM_001143830,NM_005256,NM_177553	3.57722e-27	99.1379
chr9	114370468	-	Intron	NR_034087	1.24366e-28	99.1304
chr7	99486438	-	-	-	4.0031e-27	99.1071
chrX	54401637	-	-	-	4.81085e-18	99.0991
chr12	121577041	-	Intron	NR_033953	4.1356e-26	99.0909
chr19	15241215	+	-	-	5.78531e-41	99.0741
chr12	47687261	-	-	-	2.14555e-15	99.0685
chr16	2258563	-	Exon	NM_001199173,NM_001199174,NM_001199175,NM_022372	1.18254e-34	99.0566
chr19	48026298	+	-	-	1.75057e-18	99.0566
chr5	167831549	+	Intron	NM_001161661,NM_001161662,NM_015238	4.65398e-05	99.0566
chr6	105333939	-	-	-	4.92128e-52	98.9703
chr11	132031635	-	Intron	NM_001048209,NM_001144058,NM_001144059,NM_016522	7.44043e-17	98.9583
chr11	235171	+	Intron	NM_012239	3.5926e-35	98.9158
chr17	76113703	+	-	-	8.63687e-28	98.913
chr12	57083511	+	-	-	1.12434e-05	98.913
chrX	30631369	-	-	-	1.06203e-24	98.8703
chr10	134451987	-	Intron	NM_005539	7.79743e-16	98.855
chr21	44161775	-	Intron	NM_001001576,NM_001001580	8.42538e-07	98.8095
chr16	84871318	+	Intron	NM_031476	2.03602e-05	98.7903
chr5	1100291	-	Intron	NM_006598	4.30866e-12	98.7805
chr19	47250957	-	Intron	NM_001039885,NM_024301	3.20449e-37	98.7603
chr16	33955920	+	-	-	8.02373e-09	98.7179
chr5	156644939	-	-	-	7.76123e-30	98.6886
chr12	56629415	+	-	-	1.88399e-29	98.6585
chr19	35850313	-	Exon	NM_005304	7.22709e-27	98.5348
chr16	22150533	-	-	-	2.47339e-42	98.5294
chr21	43166255	-	Intron	NM_020639	1.53484e-17	98.3871
chr1	33439614	-	-	-	2.88736e-26	98.3333
chr2	15805235	+	-	-	1.35881e-16	98.2699
chr14	101348036	-	Exon	NM_001134888	4.69894e-31	98.2639
chr2	29438665	+	-	-	6.25586e-23	98.2036
chr5	27120326	-	-	-	3.45947e-09	98.1771
chr6	159797128	-	-	-	6.90492e-31	98.0934
chr1	87760191	-	-	-	8.30372e-23	98.062
chr12	132662878	+	-	-	3.44381e-36	98.0228
chr8	143153161	+	-	-	5.25262e-14	98
chr8	141052837	-	Intron	NM_001160372,NM_031466	2.81399e-32	97.8113
chr10	1078476	-	Intron	NR_027708,NR_027709	1.48148e-11	97.7876
chr9	131219585	-	Promoter	NM_153433,NM_153440	2.35976e-16	97.7419
chr8	144858258	-	-	-	7.24128e-15	97.7171
chr13	32631819	-	Intron	NM_023037	6.68094e-19	97.6342
chr1	6116293	+	Intron	NM_172130	3.59313e-09	97.5
chrX	43338128	-	-	-	7.14619e-11	97.3517
chr17	42201940	-	Promoter	NM_001015053,NM_005474	4.29148e-20	97.2868
chr10	100205528	-	Intron	NM_182639	6.76868e-06	97.2735
chr12	115161328	-	-	-	1.83981e-39	97.1429
chr7	562695	-	Exon	NR_033963	2.22349e-12	97.1311
chr11	31671313	+	Intron	NM_019040	5.53173e-13	97.1111
chr19	54594573	-	-	-	2.4283e-32	96.9466
chr11	66277562	-	Promoter	NM_024649	4.97117e-42	96.9401
chr1	228427447	+	-	-	4.2797e-37	96.875
chr11	62692737	-	-	-	1.08063e-20	96.875
chr2	237072436	+	-	-	5.38881e-51	96.8646
chr20	61147602	+	Promoter	NM_178463	1.64366e-17	96.8182
chr22	51110972	+	-	-	4.79852e-51	96.7525
chr7	100896136	-	-	-	2.86449e-26	96.7348
chr5	178548780	-	Intron	NM_014244	4.65398e-05	96.6667
chr8	37755910	+	Intron	NM_001002814,NM_025151	5.56304e-30	96.5714
chr1	1109974	-	Promoter	NM_001130045	2.81255e-44	96.5628
chr14	103593686	-	-	-	7.76531e-25	96.4706
chr22	30675651	-	-	-	3.7601e-35	96.4286
chr5	1100332	-	Intron	NM_006598	7.09465e-14	96.4286
chr1	202328691	-	Intron	NM_001167857,NM_001167858,NM_002481	1.29132e-10	96.4286
chr2	242755778	-	-	-	2.16216e-10	96.281
chr14	104571594	-	-	-	2.62656e-64	96.2317
chr19	658093	-	Intron	NM_194460	7.51983e-14	96.0526
chr11	50257428	-	Exon	NR_003034	2.14651e-11	96
chrX	79270042	+	-	-	1.82682e-48	95.7547
chr2	74212126	+	-	-	6.41421e-08	95.7176
chr16	30517737	-	Intron	NM_001114380,NM_002209	3.72168e-08	95.6731
chr10	99121419	-	Intron	NM_001145114,NM_015179	9.4568e-13	95.6522
chr10	1078502	-	Intron	NR_027708,NR_027709	1.60758e-11	95.6503
chr9	135521237	+	Intron	NM_022779,NM_138620	6.3922e-26	95.5508
chr13	19517859	-	-	-	8.9033e-07	95.4802
chr3	140738197	-	-	-	6.1835e-10	95.4023
chr10	131005677	-	-	-	1.9041e-42	95.3985
chr10	131005679	-	-	-	1.9041e-42	95.3985
chr2	209252898	-	-	-	2.03751e-08	95.2381
chr10	131005695	-	-	-	8.05074e-42	95.1472
chr10	131005688	-	-	-	1.9041e-42	95.0309
chr10	72889853	+	-	-	4.30437e-23	95.001
chr5	163677828	+	-	-	0.00174972	95
chr9	89560808	-	Exon	NM_002048	8.87239e-33	94.8718
chr14	79956199	-	Intron	NM_001105250,NM_004796,NM_138970	4.50421e-26	94.8529
chr3	140738360	-	-	-	6.1835e-10	94.8276
chr10	131005699	-	-	-	8.05074e-42	94.7796
chr1	2452802	-	Intron	NM_018216	1.49213e-36	94.7619
chr1	226127500	-	Exon	NM_001172425	2.1532e-37	94.6809
chr1	16441510	-	-	-	3.7423e-64	94.6623
chr3	58587639	+	-	-	9.36385e-23	94.6602
chr12	125405739	-	-	-	3.57891e-73	94.5122
chr17	1601390	-	-	-	3.74145e-39	94.4444
chr12	38531426	+	-	-	3.20792e-32	94.4444
chr10	131005697	-	-	-	4.77142e-40	94.3935
chr5	134070633	+	-	-	9.0427e-25	94.3089
chr1	31357011	+	Intron	NM_014654	1.55859e-56	94.2794
chr14	102480835	+	Intron	NM_001376	8.05759e-19	94.2514
chr19	16360572	-	-	-	8.01619e-15	94.2308
chr15	20104945	-	-	-	9.70894e-49	94.2021
chr12	108909090	-	Promoter	NM_007076	8.80429e-05	94.1558
chr5	159399927	+	Exon	NM_000679	0.00474078	94.1038
chr17	1659386	+	-	-	3.90418e-09	94.0324
chr7	155175156	-	-	-	3.55751e-54	93.8819
chr22	47395687	+	Intron	NM_014346	2.07757e-10	93.7888
chr16	89989660	-	Promoter	NM_006086	1.79503e-59	93.7728
chr5	178384173	-	-	-	0.00104642	93.75
chr16	89426051	-	Intron	NM_001256183	5.91003e-38	93.7329
chr2	74212045	+	-	-	2.4711e-09	93.6559
chr11	59337779	-	-	-	2.30301e-23	93.6012
chr2	45179898	+	-	-	7.31758e-57	93.5049
chr5	127872002	-	Intron	NM_001999	3.4276e-41	93.4426
chr2	74212006	+	-	-	6.77856e-10	93.4409
chr2	74212012	+	-	-	6.77856e-10	93.4409
chr2	74212017	+	-	-	6.77856e-10	93.4409
chr2	74212019	+	-	-	6.77856e-10	93.4409
chr2	74212024	+	-	-	6.77856e-10	93.4409
chr2	74212026	+	-	-	6.77856e-10	93.4409
chr2	74212033	+	-	-	6.77856e-10	93.4409
chr2	74212107	+	-	-	6.77856e-10	93.4409
chr2	74212110	+	-	-	6.77856e-10	93.4409
chr2	74212043	+	-	-	2.4711e-09	93.4409
chr9	137482333	-	-	-	9.92096e-13	93.4211
chr2	74212049	+	-	-	2.4711e-09	93.4184
chr14	23450909	-	Exon	NM_032876	1.61784e-35	93.3453
chr18	812892	-	Promoter	NM_005433	1.10647e-20	93.268
chr1	45063352	-	Intron	NM_018150	4.6282e-09	93.2022
chr6	5176248	-	Intron	NM_020408	9.23909e-27	93.0836
chr8	143258143	-	Promoter	NR_039682	1.5332e-21	93.0085
chr9	139964789	-	Exon	NM_178448	1.1573e-39	92.978
chr7	150110	+	-	-	1.0033e-14	92.8571
chr1	179057075	-	Exon	NM_022371	4.02037e-25	92.7861
chr3	126095246	-	-	-	5.11725e-14	92.7215
chr22	17600704	+	Exon	NM_001163079	8.16086e-53	92.4208
chr19	57130279	-	Intron	NM_021216	8.55432e-32	92.3729
chr21	47061210	-	-	-	1.67257e-34	92.3522
chr9	132935703	+	Promoter	NM_014286	2.35031e-06	92.3106
chr13	114821772	-	Intron	NM_007368	2.15234e-09	92.3077
chr2	38594604	+	Intron	NR_024191	0.000538954	92.2822
chr18	44004928	-	Intron	NM_152470	8.51923e-70	92.2481
chr3	57677730	-	Intron	NM_152678	3.04542e-33	92.2222
chr2	15805224	+	-	-	2.54409e-27	92.1296
chr7	155175139	-	-	-	5.83458e-46	92.0747
chr2	95719392	+	Exon	NM_002371,NM_022438,NM_022439,NM_022440	5.09969e-33	92.0455
chr19	23695262	-	-	-	1.97548e-37	92.033
chr12	104660228	+	Intron	NM_001093771	2.6553e-13	91.9643
chr20	60306149	-	Intron	NM_001794	1.92299e-24	91.9421
chr9	132935675	+	Promoter	NM_014286	3.24213e-06	91.9104
chr7	155595911	-	Exon	NM_000193	1.2693e-46	91.8904
chr17	61564607	-	-	-	4.41534e-06	91.8768
chr3	193615790	+	-	-	1.89295e-27	91.8565
chr15	84432546	+	Intron	NM_207517	2.00957e-05	91.847
chr16	72283570	+	-	-	3.32565e-22	91.7722
chr1	11121282	+	-	-	6.33326e-14	91.7431
chr4	1196092	-	Intron	NR_024569	4.02061e-54	91.691
chr2	240167933	-	Intron	NM_006037	1.94775e-07	91.6667
chrX	16803551	-	-	-	1.40323e-39	91.6406
chr8	13126628	+	Intron	NM_182643	8.93862e-06	91.585
chr18	45854409	+	-	-	6.41787e-28	91.5112
chr20	16553968	+	Exon	NM_001199865,NM_001199866,NM_024704	0.00159076	91.4962
chr6	27506895	-	-	-	2.14253e-38	91.4815
chr8	11400650	-	Intron	NM_001715	1.20884e-20	91.3793
chr6	18019970	-	-	-	5.74027e-55	91.3294
chr1	228118381	-	Intron	NM_003395	4.27102e-18	91.3043
chr12	108909138	-	Promoter	NM_007076	0.000271684	91.2139
chr7	155175172	-	-	-	1.96411e-43	91.2033
chr7	155175285	-	-	-	1.96411e-43	91.2033
chrX	149936816	+	Exon	NM_001184808,NM_001242614,NM_031462,NM_134445,NM_134446	2.48696e-26	91.1551
chr16	4997655	-	-	-	2.18726e-15	91.0714
chr8	120684337	+	-	-	0.000451038	91.0642
chr3	50264085	-	-	-	4.0125e-11	91.0317
chr15	50937829	-	Intron	NM_017672	0.000415909	91.0112
chr15	85290752	+	-	-	3.47051e-25	90.9384
chr12	131309467	+	Intron	NM_001980,NM_194356	0.000360647	90.9091
chr6	18020052	-	-	-	3.86822e-53	90.892
chr10	126185044	-	Intron	NM_001167880,NM_022126	4.51183e-27	90.877
chr12	108909102	-	Promoter	NM_007076	0.000340802	90.8135
chr12	108909104	-	Promoter	NM_007076	0.000340802	90.8135
chr12	108909113	-	Promoter	NM_007076	0.000340802	90.8135
chr12	108909134	-	Promoter	NM_007076	0.000340802	90.8135
chr12	108909136	-	Promoter	NM_007076	0.000340802	90.8135
chr12	108909167	-	Promoter	NM_007076	0.000340802	90.8135
chr22	46504439	-	Intron	NR_027033	4.02592e-20	90.7629
chr15	42184558	-	-	-	1.19107e-18	90.6977
chr4	7676029	-	-	-	2.35217e-23	90.625
chr14	23450940	-	Exon	NM_032876	4.9972e-37	90.5839
chr14	23450969	-	Exon	NM_032876	4.9972e-37	90.5839
chr14	23450995	-	Exon	NM_032876	4.9972e-37	90.5839
chr22	22301626	-	Intron	NM_014634	1.97121e-20	90.5702
chr16	49740913	-	Intron	NM_001271620,NM_015069	3.82609e-18	90.551
chr14	23450957	-	Exon	NM_032876	9.26352e-37	90.4841
chr18	77713258	+	-	-	2.62599e-07	90.443
chr20	37678976	-	-	-	1.25984e-15	90.4411
chr17	1858971	-	Intron	NM_178568	5.62323e-07	90.3703
chr6	128342637	+	-	-	2.01277e-12	90.3647
chrX	102585131	-	Promoter	NM_152278	6.12784e-25	90.3533
chr17	78075234	+	Promoter	NM_000152,NM_001079803,NM_001079804	1.491e-56	90.326
chr17	74132943	-	Exon	NM_001454	2.28097e-11	90.2778
chr6	166314942	-	-	-	6.78399e-83	90.1198
chr14	23450987	-	Exon	NM_032876	1.47866e-35	90.1154
chr20	37678926	-	-	-	1.25984e-15	90.0258
chr20	37678934	-	-	-	5.34091e-15	90.0258
chrX	31240032	-	Intron	NM_000109,NM_004006,NM_004007,NM_004009,NM_004010,NM_004011,NM_004012,NM_004013,NM_004014,NM_004015,NM_004016,NM_004017,NM_004018,NM_004019,NM_004020,NM_004021,NM_004022,NM_004023	8.93742e-47	90.019
chr1	229369496	-	-	-	5.58822e-20	90
chrX	152831343	-	Intron	NM_021949	1.5707e-18	90
chr5	41637604	+	-	-	2.00227e-17	90
chr9	103172308	+	-	-	2.14842e-05	90
chr15	50944386	+	Intron	NM_017672	1.08285e-25	89.9943
chr13	37633630	+	Promoter	NM_001014286,NM_017569	2.6113e-43	89.9456
chr2	74212121	+	-	-	6.77877e-10	89.8695
chr1	41962053	+	-	-	4.20899e-11	89.8432
chr6	26569490	-	-	-	7.44068e-25	89.8255
chr5	1100311	-	Intron	NM_006598	3.54615e-09	89.7959
chr5	1100328	-	Intron	NM_006598	3.54615e-09	89.7959
chr6	144507900	+	Exon	NM_003764	1.19706e-13	89.7727
chr9	89192469	+	-	-	1.71849e-30	89.6449
chr11	27356722	+	-	-	3.91817e-08	89.5545
chr11	27356730	+	-	-	3.91817e-08	89.5545
chr11	14926728	+	-	-	1.69937e-05	89.5349
chr6	26569508	-	-	-	7.44068e-25	89.5243
chr6	26569597	-	-	-	7.44068e-25	89.5243
chr20	37678893	-	-	-	1.25984e-15	89.5238
chr20	37678896	-	-	-	1.25984e-15	89.5238
chr20	37679004	-	-	-	1.25984e-15	89.5238
chr11	61323125	+	Intron	NM_001252065,NM_004200	4.2458e-33	89.5039
chr11	65359723	+	Exon	NM_001099409	2.716e-35	89.4942
chr14	57278070	-	Promoter	NM_001270523,NM_001270524,NM_021728,NR_073034	2.164e-11	89.4239
chr17	1051903	-	Intron	NM_021962	6.54545e-15	89.367
chrX	2845369	-	Intron	NM_001669	5.83649e-27	89.311
chr7	155595946	-	Exon	NM_000193	4.10656e-43	89.2924
chr8	144105842	+	-	-	4.3613e-14	89.2683
chr20	37678909	-	-	-	1.25984e-15	89.2506
chr20	37678993	-	-	-	1.25984e-15	89.2506
chr7	155595954	-	Exon	NM_000193	2.62328e-42	89.1876
chr7	155595958	-	Exon	NM_000193	2.62328e-42	89.1876
chr7	155595960	-	Exon	NM_000193	2.62328e-42	89.1876
chr7	155595948	-	Exon	NM_000193	2.62328e-42	89.1685
chr3	51201782	-	Intron	NM_004947	0.000959147	89.1304
chr7	155595943	-	Exon	NM_000193	3.50879e-42	89.1146
chr2	240196976	-	Intron	NM_006037	7.16229e-32	89.0016
chr5	34724525	-	Intron	NM_001145525	4.37266e-20	88.8889
chr12	123329932	-	Intron	NM_003959	3.77831e-19	88.875
chr12	123329840	-	Intron	NM_003959	5.02136e-19	88.795
chr17	30323055	+	-	-	4.10636e-30	88.7775
chr7	155595969	-	Exon	NM_000193	2.62328e-42	88.7203
chr1	2928632	-	-	-	4.78316e-31	88.7057
chr7	155595937	-	Exon	NM_000193	1.56165e-40	88.6974
chr7	155595993	-	Exon	NM_000193	1.56165e-40	88.6974
chr22	22306387	+	Promoter	NM_014634	1.32017e-28	88.5869
chr5	140167726	+	Exon	NM_018900	1.22642e-41	88.5714
chr5	140167803	+	Exon	NM_018900	1.22642e-41	88.5714
chr16	46791788	-	-	-	1.77993e-24	88.558
chr22	46385192	-	-	-	0.000934011	88.5522
chr14	43167912	+	-	-	1.36499e-07	88.5294
chr20	61975109	+	Exon	NM_000744,NM_001256573,NR_046317	1.86245e-05	88.5206
chr1	70033106	+	-	-	1.30625e-22	88.5062
chr12	108909181	-	Promoter	NM_007076	2.25756e-05	88.4419
chr1	178289636	+	Intron	NM_170692	3.55716e-09	88.4328
chr4	1514493	+	-	-	1.6761e-38	88.3234
chr4	1228135	-	Intron	NM_001012614,NM_001328	1.66835e-42	88.2716
chr14	105877470	+	Intron	NM_001195082	0.00192598	88.2353
chr12	101039343	+	-	-	4.53991e-26	88.235
chr9	127988882	+	Intron	NM_001174152,NM_001174153,NM_005833	1.78132e-05	88.2184
chr12	117096354	-	-	-	6.99275e-18	88.2058
chr7	155596007	-	Exon	NM_000193	1.15551e-38	88.1977
chr4	1514519	+	-	-	8.24301e-38	88.1737
chr1	70033001	+	-	-	3.63442e-32	88.1435
chr2	121279856	+	-	-	6.12562e-31	88.1434
chr17	79226905	-	Exon	NM_001037984,NM_138570	7.62256e-23	88.1376
chr8	28492408	-	-	-	6.37634e-28	88.0952
chr12	100750695	+	Promoter	NM_001145288,NM_139319	1.03709e-11	88.0952
chr12	91507556	-	-	-	5.27604e-52	87.9962
chr7	129421736	-	-	-	2.53779e-40	87.9867
chr19	45996461	-	Exon	NM_005619	6.53984e-28	87.9592
chr2	220253383	+	Promoter	NM_012100	2.11172e-39	87.9372
chr6	151850685	-	Intron	NM_025059	7.20173e-18	87.9227
chrX	70270007	-	-	-	1.07217e-11	87.9121
chr20	37678907	-	-	-	1.25984e-15	87.8845
chr4	143818922	-	-	-	9.71491e-18	87.8788
chr6	17988463	+	Promoter	NM_001105566,NM_001105567,NM_001105568,NM_001243423,NM_022113	4.81416e-26	87.7898
chr6	17988371	+	Promoter	NM_001105566,NM_001105567,NM_001105568,NM_001243423,NM_022113	4.81416e-26	87.7594
chr14	23451010	-	Exon	NM_032876	2.33457e-34	87.7574
chr1	245285294	-	-	-	1.2261e-15	87.7193
chr7	100553210	-	-	-	0.00132409	87.7007
chr6	17988374	+	Promoter	NM_001105566,NM_001105567,NM_001105568,NM_001243423,NM_022113	4.81416e-26	87.6987
chr6	17988392	+	Promoter	NM_001105566,NM_001105567,NM_001105568,NM_001243423,NM_022113	4.81416e-26	87.6987
chr6	17988404	+	Promoter	NM_001105566,NM_001105567,NM_001105568,NM_001243423,NM_022113	4.81416e-26	87.6987
chr20	37678955	-	-	-	5.01935e-08	87.6741
chr1	3144597	+	Intron	NM_022114,NM_199454	8.32878e-23	87.6732
chr12	117096280	-	-	-	6.99275e-18	87.6732
chr1	3294126	+	Intron	NM_022114,NM_199454	3.13294e-21	87.6623
chr10	102497289	+	-	-	1.30436e-09	87.6165
chr11	132951878	-	Intron	NM_001012393	4.9414e-36	87.5928
chrX	70366947	-	-	-	1.67345e-38	87.5835
chr19	3106963	-	Intron	NM_002067	1.69128e-07	87.5494
chr17	46043148	+	-	-	4.14704e-06	87.5376
chr14	105026373	-	-	-	5.06052e-06	87.5
chrX	104476045	+	Intron	NM_017416	2.17989e-64	87.4539
chr18	74834591	+	Intron	NM_001025100,NM_001025101	1.09061e-19	87.4531
chr6	17988366	+	Promoter	NM_001105566,NM_001105567,NM_001105568,NM_001243423,NM_022113	4.81416e-26	87.3993
chr1	45068924	+	Intron	NM_018150	7.89589e-35	87.3819
chr1	45068939	+	Intron	NM_018150	7.89589e-35	87.3819
chr1	45069049	+	Intron	NM_018150	1.03088e-34	87.3819
chr13	110439501	+	Promoter	NM_003749	1.00663e-18	87.3333
chr17	26569731	-	-	-	1.14213e-31	87.319
chr21	45413689	-	-	-	1.49167e-20	87.273
chr3	152927597	+	-	-	3.36251e-39	87.2727
chr11	75265776	+	-	-	6.60049e-28	87.234
chr6	43517097	-	Intron	NM_020750	2.4231e-15	87.2164
chr18	64107792	-	-	-	1.63948e-50	87.1988
chr5	148179497	+	-	-	4.6637e-17	87.1831
chr3	50263990	-	-	-	6.06731e-11	87.1103
chr11	68944149	-	-	-	4.70161e-12	87.0421
chr7	26480644	-	Intron	NR_015364	1.52276e-26	87.039
chrX	152913548	-	-	-	3.86451e-30	87.037
chr14	57278022	-	Promoter	NM_001270523,NM_001270524,NM_021728,NR_073034	1.9687e-17	87.0347
chr5	176046039	-	-	-	4.13563e-31	87.0073
chr11	110236197	+	-	-	3.43904e-07	86.9377
chr19	50178983	-	-	-	7.04741e-13	86.8781
chr15	93687520	-	-	-	0.000148604	86.875
chrX	53078295	-	Promoter	NM_018969	4.47942e-41	86.8715
chr6	33679566	+	Promoter	NM_032340	6.60862e-46	86.7814
chr14	71793893	-	-	-	8.6746e-12	86.768
chr10	124578279	-	-	-	5.2229e-32	86.7586
chr17	17399611	+	Exon	NM_001199989,NM_016084	1.56618e-18	86.6685
chr21	46835381	-	Intron	NM_130445	0.00230866	86.6667
chr8	37887500	-	Promoter	NM_004095	3.25702e-16	86.6108
chr11	133821284	+	Intron	NM_014987	2.43472e-12	86.6056
chr22	20185286	-	-	-	1.90278e-56	86.5952
chr1	41962043	+	-	-	3.17897e-10	86.5901
chr2	227700266	-	Promoter	NM_001167608,NM_032276	3.13382e-36	86.5692
chr11	57244439	-	-	-	2.84304e-26	86.5018
chr14	23450962	-	Exon	NM_032876	2.85215e-35	86.4934
chr5	113698885	+	Exon	NM_021614	8.03342e-23	86.4795
chr1	183527698	+	Intron	NM_000433,NM_001127651,NM_001190789,NM_001190794	1.91876e-13	86.4737
chr17	79007551	+	Promoter	NR_026857	3.30778e-27	86.4706
chr10	124578284	-	-	-	2.85146e-32	86.4678
chr8	124553355	+	Exon	NM_001242463,NM_058229	9.7599e-09	86.4623
chr18	10032576	-	-	-	7.3298e-23	86.432
chr17	57504433	+	-	-	1.63185e-05	86.4286
chr16	27124759	-	-	-	1.87668e-06	86.4198
chr15	97691012	-	-	-	4.99699e-27	86.402
chr13	99142860	-	Intron	NM_001032296,NM_003576	0.000245273	86.3772
chr6	5986990	-	-	-	1.20931e-15	86.3636
chrX	38889729	+	-	-	1.62812e-17	86.3511
chr5	137789427	-	-	-	2.60024e-08	86.3279
chr22	49200751	+	-	-	1.03967e-29	86.315
chr16	75284207	-	Intron	NM_001170720	7.2491e-16	86.3099
chr14	48384444	+	-	-	7.20806e-39	86.3037
chr5	101996644	-	-	-	0.000154069	86.2805
chr10	130164506	+	-	-	0.00402184	86.25
chr13	99142839	-	Intron	NM_001032296,NM_003576	0.000245322	86.1145
chr1	41961891	+	-	-	2.57799e-10	86.1109
chr1	41962041	+	-	-	2.57799e-10	86.1109
chr1	247152115	-	Intron	NM_001204221,NM_020394,NR_037892,NR_037894	2.29567e-13	86.1023
chr16	75284244	-	Intron	NM_001170720	1.25379e-15	86.072
chr8	3828481	+	Intron	NM_033225	1.54679e-20	86.0465
chr3	50264094	-	-	-	4.01243e-11	86.0317
chr3	50264020	-	-	-	4.33294e-11	86.0317
chr10	135015722	+	Intron	NM_152643	1.75389e-15	86.0294
chr10	135015735	+	Intron	NM_152643	1.75389e-15	86.0294
chr18	24468785	+	-	-	1.10506e-40	86.0043
chr1	41961921	+	-	-	3.17897e-10	85.9804
chr22	43485170	-	Promoter	NM_012263,NR_027779	1.538e-71	85.9714
chr22	43485244	-	Promoter	NM_012263,NR_027779	1.538e-71	85.9714
chr10	94208644	+	-	-	1.92079e-14	85.97
chr12	132899975	-	Intron	NM_001122636	6.84753e-05	85.9568
chr1	41962035	+	-	-	3.34412e-10	85.9516
chr3	50264004	-	-	-	4.38274e-11	85.9477
chr22	43485212	-	Promoter	NM_012263,NR_027779	9.86406e-70	85.932
chr12	128383350	+	-	-	1.69487e-37	85.8727
chr1	41962038	+	-	-	3.90203e-10	85.8498
chr1	41961887	+	-	-	1.67198e-10	85.8177
chr22	43485162	-	Promoter	NM_012263,NR_027779	2.04968e-71	85.8111
chr22	43485176	-	Promoter	NM_012263,NR_027779	2.04968e-71	85.8111
chr22	43485230	-	Promoter	NM_012263,NR_027779	3.53106e-71	85.8106
chr6	139695483	-	Exon	NM_001168388	1.31586e-48	85.8085
chr8	119139508	+	-	-	2.5645e-80	85.7515
chr1	41962010	+	-	-	4.89152e-10	85.7043
chr11	132951900	-	Intron	NM_001012393	3.06326e-36	85.6886
chr2	145231607	+	Intron	NM_001171653,NM_014795	5.71027e-30	85.6796
chr14	105715553	+	Exon	NM_033271	0.00117095	85.6515
chr22	43485228	-	Promoter	NM_012263,NR_027779	9.89169e-70	85.6461
chr22	43485178	-	Promoter	NM_012263,NR_027779	1.21313e-69	85.6455
chr22	43485226	-	Promoter	NM_012263,NR_027779	9.93922e-70	85.6445
chr8	64052074	+	-	-	2.35234e-54	85.6264
chr16	31453711	-	Promoter	NM_001136509	3.98371e-10	85.5835
chr14	23450934	-	Exon	NM_032876	9.1628e-34	85.5746
chr8	61445388	+	Intron	NM_002865	4.69473e-19	85.4911
chr15	85290925	+	Promoter	NM_014630	2.19186e-20	85.4704
chr22	43485143	-	Promoter	NM_012263,NR_027779	4.5004e-62	85.3825
chr16	2480615	+	Intron	NM_001761	1.62607e-21	85.3761
chr1	5957733	+	Intron	NM_015102	3.85646e-50	85.3528
chr19	3783925	+	-	-	5.94733e-10	85.3333
chr13	100487608	-	Intron	NM_206808	1.47768e-14	85.317
chr19	50309120	-	-	-	4.64431e-53	85.2983
chr16	4997639	-	-	-	3.10169e-15	85.2575
chr15	68628219	-	Intron	NM_001004439	2.87264e-10	85.1979
chr4	85220373	+	-	-	6.33908e-19	85.1852
chrX	38660515	-	Promoter	NM_001098790,NM_001098791	2.81522e-45	85.1381
chr3	126243650	+	Promoter	NM_152889	1.97007e-15	85.1334
chr11	124735534	-	Exon	NM_022370	1.27754e-33	85.119
chr22	43485190	-	Promoter	NM_012263,NR_027779	4.55388e-69	85.1155
chr16	31453703	-	Promoter	NM_001136509	2.03851e-09	85.1119
chr19	18981508	-	Intron	NM_001492,NM_021267	6.1835e-10	85.092
chr11	132951938	-	Intron	NM_001012393	5.07355e-36	85.084
chr1	70033085	+	-	-	1.28869e-25	85.0025
chr17	80931419	-	Intron	NM_001009905	5.26745e-19	85
chr19	1571161	+	-	-	4.37552e-26	84.9811
chr5	95247302	-	Intron	NM_012081	2.0084e-06	84.9775
chrX	152831487	-	Intron	NM_021949	1.24721e-25	84.9246
chr1	764633	+	Intron	NR_047526	5.43238e-26	84.919
chr16	89768826	+	Promoter	NM_152339	5.18419e-62	84.8795
chr10	114877427	+	Intron	NM_001198530	1.24547e-20	84.8553
chr4	17812807	-	Promoter	NM_017741	9.38049e-36	84.8484
chr5	42954038	-	-	-	6.3825e-24	84.8214
chr18	75988420	+	-	-	1.74344e-23	84.8168
chr19	48763009	-	-	-	1.4035e-24	84.8081
chr7	157291988	-	-	-	4.18502e-17	84.7494
chr1	19153424	+	-	-	4.18696e-32	84.7448
chr19	19216272	-	-	-	3.9375e-60	84.7273
chr17	10197024	+	-	-	0.000663797	84.7258
chr15	23018601	+	Intron	NM_001008894,NM_001184888	3.49296e-10	84.7249
chr1	70033073	+	-	-	3.35023e-24	84.6757
chr10	124028041	-	-	-	4.86574e-09	84.6591
chr5	81846	+	-	-	1.70189e-23	84.6512
chr1	41962048	+	-	-	3.17897e-10	84.629
chr11	450306	+	Exon	NM_030783	1.18581e-33	84.6233
chrX	57936664	-	Exon	NM_007156	5.87382e-25	84.6161
chr7	99650608	+	Intron	NM_145914	1.75926e-08	84.5875
chr11	120097647	+	Exon	NM_178507	5.80886e-13	84.5588
chr1	21924529	-	Exon	NM_001145658,NM_002885	1.63522e-23	84.5216
chr16	2219626	-	Intron	NM_032271	0.00396615	84.5
chr1	70033005	+	-	-	3.35023e-24	84.4978
chr2	220253234	+	Promoter	NM_012100	1.52403e-33	84.4848
chr5	95247297	-	Intron	NM_012081	2.44392e-06	84.4733
chr13	113718080	-	-	-	3.49066e-07	84.4482
chr2	220253337	+	Promoter	NM_012100	2.00491e-33	84.4076
chr4	169424654	+	Intron	NM_001166108,NM_016081	7.66177e-14	84.375
chr10	135015726	+	Intron	NM_152643	1.75389e-15	84.3299
chr2	220253240	+	Promoter	NM_012100	3.01456e-33	84.2996
chr2	220253246	+	Promoter	NM_012100	3.01456e-33	84.2996
chr2	220253265	+	Promoter	NM_012100	3.01456e-33	84.2996
chr2	220253339	+	Promoter	NM_012100	3.01456e-33	84.2996
chr2	220253357	+	Promoter	NM_012100	3.01456e-33	84.2996
chr2	220253363	+	Promoter	NM_012100	3.01456e-33	84.2996
chr1	70033057	+	-	-	5.56204e-24	84.2754
chr17	12325395	-	-	-	1.32158e-28	84.2378
chr13	25469230	+	Intron	NM_018451,NR_047594,NR_047595	2.13761e-10	84.127
chrX	102010584	-	-	-	7.56254e-27	84.1163
chr2	34420757	+	-	-	6.08926e-09	84.1137
chr2	124946152	+	Intron	NM_130773	0.000735981	84.1137
chr10	135273451	+	Exon	NR_002934	2.33891e-57	84.097
chr3	52322527	+	Promoter	NM_001144951,NM_145262,NR_026699,NR_026700,NR_026701,NR_026702	1.81869e-43	84.0714
chr16	2480603	+	Intron	NM_001761	5.70093e-24	84.07
chr9	118571475	+	-	-	0.000495361	84.0675
chr15	64609584	-	Intron	NM_022048	1.07198e-53	84.0511
chr2	220253368	+	Promoter	NM_012100	7.75813e-33	84.0417
chr17	54910857	+	Promoter	NM_001085430	2.37476e-09	84.0152
chr1	70033048	+	-	-	2.31166e-23	84.0003
chr7	2209553	+	Intron	NM_001013836,NM_001013837,NM_003550	6.60638e-07	83.988
chr18	72920462	+	Promoter	NM_175907	4.37167e-07	83.9837
chr5	45492831	+	Intron	NM_021072	5.93191e-23	83.9176
chr20	62525728	+	Promoter	NM_025219	7.92176e-15	83.9099
chr1	1121035	+	Exon	NM_153254	2.28301e-12	83.9018
chr2	220253254	+	Promoter	NM_012100	9.36225e-32	83.899
chr2	220253376	+	Promoter	NM_012100	3.01456e-33	83.8898
chrX	70402608	-	-	-	2.14313e-30	83.8785
chr20	62289300	-	Exon	NM_016434,NM_032957,NR_037882	1.84563e-20	83.7836
chr2	220253359	+	Promoter	NM_012100	3.01456e-33	83.7741
chr2	99775553	-	Intron	NR_037936	3.81866e-11	83.7133
chr7	157292037	-	-	-	1.26175e-16	83.7
chr22	47395777	+	Intron	NM_014346	2.37439e-08	83.6835
chr10	3161626	+	Intron	NM_001242339,NM_002627	0.00115651	83.6364
chr11	1284111	+	-	-	3.83334e-15	83.6112
chr12	30322731	-	-	-	5.28589e-45	83.5223
chr14	92853816	+	Intron	NM_153646,NM_153647,NM_153648	1.40566e-37	83.5129
chr2	99854355	-	-	-	2.73133e-14	83.4995
chr9	138106357	-	-	-	5.17252e-47	83.4888
chr21	45933168	+	Intron	NM_144991	2.41849e-40	83.4779
chrX	70402624	-	-	-	1.17281e-29	83.4727
chr17	36881615	-	Intron	NM_005937	7.45844e-13	83.468
chr7	28995826	-	Exon	NM_014817	6.40102e-51	83.4672
chr1	1109962	-	Promoter	NM_001130045	2.06475e-40	83.4322
chr10	114877434	+	Intron	NM_001198530	8.41882e-48	83.3861
chr17	74186937	+	Intron	NM_052916	0.000139056	83.3723
chr7	150754214	+	Promoter	NM_001164410,NM_004935	2.51158e-34	83.3583
chrX	70402599	-	-	-	1.05352e-29	83.3333
chr16	32289964	-	-	-	9.25275e-23	83.3333
chr19	4482603	-	Intron	NM_001001520,NM_032631	2.8071e-05	83.3333
chr6	3726835	+	Intron	NM_183373	1.82757e-16	83.3256
chr16	844405	-	Intron	NM_022092	1.97359e-07	83.3079
chr16	1100771	+	-	-	1.02115e-25	83.2632
chr12	50297282	-	Promoter	NM_012306	1.00629e-19	83.2076
chr12	50297371	-	Promoter	NM_012306	1.00629e-19	83.2076
chr17	11361217	-	Intron	NM_207386	8.17964e-22	83.1865
chr2	220253229	+	Promoter	NM_012100	3.58409e-31	83.1603
chr1	70033097	+	-	-	5.0539e-22	83.1585
chr6	108496088	+	Exon	NM_003269	2.19993e-41	83.1138
chr6	1622817	+	-	-	4.88318e-15	83.1135
chr17	73893413	+	Promoter	NM_001256124,NM_173547	4.63148e-41	83.1111
chr7	33176935	+	Intron	NM_001033604,NM_001033605,NM_014451,NM_198428	6.72193e-44	83.0821
chr19	1071805	+	Intron	NM_001258328,NM_012292	2.56407e-08	83.0764
chr11	6591962	-	Exon	NM_144666	4.79084e-07	83.0645
chr3	197282308	+	Promoter	NM_004051,NM_203314	4.83736e-50	83.002
chr8	101506670	-	-	-	3.81178e-23	82.9976
chr17	62098038	-	-	-	1.60665e-13	82.9919
chr13	98866474	-	Intron	NM_005766	0.000694101	82.9876
chr3	183209713	+	Exon	NM_130446	1.08015e-07	82.9268
chr19	18889982	-	Exon	NM_001098482,NM_015321	3.12641e-25	82.9096
chr13	77523229	-	-	-	4.95002e-26	82.906
chr15	45607262	+	-	-	3.45706e-09	82.906
chr16	32290024	-	-	-	2.55667e-21	82.8986
chr16	8408445	-	-	-	5.72147e-13	82.8736
chr19	5040062	-	Intron	NM_015015	2.66069e-16	82.8571
chr19	3118059	-	Intron	NM_002067	1.04641e-52	82.8441
chr2	220253275	+	Promoter	NM_012100	1.87102e-29	82.8089
chr18	50827553	-	Intron	NM_005215	0.000517553	82.7915
chr17	44026565	+	Intron	NM_001123066,NM_001123067,NM_001203251,NM_001203252,NM_005910,NM_016834,NM_016835,NM_016841	1.58896e-26	82.7715
chr12	34477609	-	-	-	3.04103e-16	82.7347
chr10	105539035	-	Intron	NM_014631	4.82005e-10	82.6923
chr5	1636855	+	-	-	3.15455e-09	82.6916
chr9	136026265	-	-	-	4.09816e-08	82.6389
chr3	129312979	+	Intron	NM_015103	8.34055e-57	82.6118
chr3	126243614	+	Promoter	NM_152889	2.72952e-05	82.6108
chr3	137490575	+	-	-	2.17904e-15	82.5639
chr15	93042993	+	Intron	NM_153040	7.9865e-36	82.5581
chr17	22016730	-	-	-	1.02813e-26	82.5301
chr14	53313798	-	-	-	5.24798e-14	82.53
chr2	11163968	+	-	-	1.33384e-05	82.5292
chr20	60175223	+	Promoter	NM_001252339	5.80119e-14	82.5198
chr17	65766265	+	-	-	1.18165e-35	82.5119
chrX	69674848	+	Promoter	NM_001166278	0.000247557	82.5
chr18	55102089	+	Promoter	NM_004852	0.000182412	82.4427
chr16	89989717	-	Promoter	NM_006086	9.57594e-29	82.4204
chr16	89989643	-	Promoter	NM_006086	1.87594e-54	82.3288
chr1	22269498	-	-	-	5.16805e-11	82.3156
chr9	91297484	+	-	-	3.25073e-21	82.2999
chr13	45887209	-	-	-	1.51392e-15	82.2996
chr8	131058465	+	-	-	1.6022e-38	82.2671
chr8	131058474	+	-	-	1.6022e-38	82.2671
chr8	131058461	+	-	-	2.05084e-38	82.2671
chr1	6159451	+	Exon	NM_001199860,NM_001199861,NM_001199862,NM_001199863,NM_003636,NM_172130	0.00094402	82.2581
chr2	102091048	+	Promoter	NM_001145664	1.23012e-35	82.226
chr5	148586870	-	-	-	1.79583e-37	82.2119
chr17	1200319	+	Intron	NM_172367	5.03002e-14	82.1944
chr4	8114020	+	Intron	NM_001130083,NM_001130084,NM_001130085,NM_001130086,NM_001130087,NM_001130088,NM_032432	7.07747e-14	82.1534
chrX	58310268	-	-	-	3.97298e-57	82.141
chr18	55102058	+	Promoter	NM_004852	0.000207431	82.1242
chr18	55102185	+	Promoter	NM_004852	0.000207431	82.1242
chr11	118392976	+	Exon	NM_001197104,NM_005933	2.81377e-13	82.1117
chr1	153976840	+	Intron	NM_207308	2.09582e-11	82.1035
chr7	1890564	-	Intron	NM_001013836,NM_001013837,NM_003550	5.49405e-15	82.1023
chr9	140283222	-	Intron	NM_017820	3.98366e-16	82.081
chr15	78280717	-	-	-	8.68786e-26	82.0754
chr19	45147665	-	Promoter	NM_001135768,NM_001135769,NM_001135770,NM_006505	5.28629e-48	82.0462
chrX	106961984	+	Intron	NM_198057	1.97315e-46	82.04
chr12	111885901	-	Exon	NM_005475	4.86998e-25	82.0385
chr19	8575757	+	Exon	NM_001146175	9.02111e-18	82.0283
chr1	227915677	-	Promoter	NR_024485,NR_024486	6.38565e-35	81.9928
chr4	177714048	+	Promoter	NM_005429	1.21558e-17	81.9828
chr4	177714051	+	Promoter	NM_005429	1.21558e-17	81.9828
chr4	177714137	+	Promoter	NM_005429	1.21558e-17	81.9828
chr4	177714116	+	Promoter	NM_005429	1.41037e-17	81.9828
chr3	129312902	+	Intron	NM_015103	8.34055e-57	81.9505
chr17	76787490	+	-	-	8.40064e-14	81.9328
chr4	154674803	-	Intron	NM_173662	6.45135e-32	81.9133
chr16	32289958	-	-	-	1.44727e-22	81.9031
chr1	40664268	+	Intron	NM_012421	3.94294e-21	81.8834
chr1	23036739	-	Promoter	NM_004442,NM_017449	1.54757e-08	81.8537
chr12	120740714	+	Promoter	NM_012240	1.14529e-13	81.8452
chrX	69674824	+	Promoter	NM_001166278	0.000272787	81.7889
chr22	17521551	+	Intron	NR_015352	3.43979e-06	81.7785
chr5	43044574	-	-	-	9.50051e-31	81.7324
chr19	3586844	+	Exon	NM_133261	8.26313e-27	81.7043
chr8	131058382	+	-	-	1.80726e-35	81.7021
chr9	139389484	-	Exon	NM_017617	3.52409e-33	81.6832
chr19	46934788	+	-	-	9.8667e-07	81.6614
chr8	131058392	+	-	-	1.25706e-37	81.6498
chr4	177714054	+	Promoter	NM_005429	1.21558e-17	81.6449
chr4	177714061	+	Promoter	NM_005429	1.21558e-17	81.6449
chr18	55102052	+	Promoter	NM_004852	0.000189125	81.6327
chr20	34373707	-	Intron	NM_016436	1.86224e-16	81.6065
chr4	177714057	+	Promoter	NM_005429	1.21558e-17	81.6025
chr4	177714042	+	Promoter	NM_005429	1.41037e-17	81.6025
chr3	114578878	-	Intron	NM_015642	4.51302e-33	81.5902
chr22	42085703	+	Promoter	NM_001003796,NM_005008	6.04513e-08	81.5823
chr6	3784304	-	-	-	2.24611e-24	81.5789
chr7	138365619	+	-	-	9.11635e-07	81.5728
chr18	55102158	+	Promoter	NM_004852	0.000207431	81.5716
chr11	1989233	+	-	-	1.3152e-31	81.5672
chr1	33015680	+	Intron	NM_001040441	9.68403e-29	81.5653
chr16	89789318	+	Intron	NM_001113525,NM_152287	8.27982e-22	81.5628
chr18	76372079	+	-	-	2.83188e-16	81.5534
chr20	37243772	+	Intron	NM_001164431	1.90686e-18	81.5215
chr22	43117085	-	Promoter	NM_017436	3.40935e-37	81.5104
chr17	76787404	+	-	-	8.40064e-14	81.4698
chr12	44200180	-	Promoter	NM_001242397,NM_002822	1.59011e-19	81.4032
chr16	68390486	-	Intron	NM_001184824,NM_019023	4.69802e-10	81.3953
chr10	81153829	+	Intron	NM_153367	2.46298e-48	81.3819
chr12	44200141	-	Exon	NM_001242397,NM_002822	2.42654e-18	81.3789
chr12	44200170	-	Exon	NM_001242397,NM_002822	9.17495e-20	81.375
chr19	830184	+	Intron	NM_001700	2.85219e-07	81.3636
chr4	177714045	+	Promoter	NM_005429	5.62842e-17	81.3424
chr19	3586883	+	Exon	NM_133261	2.51773e-26	81.3283
chr14	78108294	+	-	-	1.43984e-14	81.3084
chr12	4554924	-	Promoter	NM_020996	1.97066e-79	81.2785
chr22	43045860	-	Promoter	NM_000398	2.48459e-23	81.25
chr6	53408964	-	Promoter	NM_001197115,NM_001498	8.4659e-14	81.2474
chr14	105715542	+	Exon	NM_033271	0.00297407	81.1756
chr9	139716121	-	Intron	NM_001173988,NM_001173989,NM_024718	4.65816e-09	81.1658
chr11	117667057	-	Promoter	NM_020693	2.2337e-29	81.1453
chr1	235243041	+	-	-	1.26439e-24	81.1366
chr2	228190438	-	-	-	5.29839e-29	81.1338
chr11	19310760	-	-	-	2.15353e-06	81.1321
chr22	38409246	-	-	-	5.37758e-20	81.1285
chrX	153744216	+	Exon	NM_001171134,NM_021806,NR_033237	1.00632e-20	81.069
chr18	56339382	-	Promoter	NM_006785,NM_173844	6.90801e-07	81.0504
chr1	5957772	+	Intron	NM_015102	5.5311e-49	81.0017
chr11	117667066	-	Promoter	NM_020693	2.2337e-29	81.0012
chr8	38256399	-	Intron	NM_144652	4.28358e-13	80.9972
chr4	177714030	+	Promoter	NM_005429	1.21558e-17	80.9692
chr9	37785421	+	Promoter	NM_001002269,NM_016042	8.41934e-38	80.9639
chr20	21086774	+	-	-	2.40396e-05	80.9524
chr14	105715415	+	Exon	NM_033271	0.00315269	80.9524
chr14	105715417	+	Exon	NM_033271	0.00315269	80.9524
chr14	105715515	+	Exon	NM_033271	0.00315269	80.9524
chr14	105715527	+	Exon	NM_033271	0.00315269	80.9524
chr14	105715530	+	Exon	NM_033271	0.00315269	80.9524
chr14	105715539	+	Exon	NM_033271	0.00315269	80.9524
chr12	44200144	-	Exon	NM_001242397,NM_002822	1.59011e-19	80.913
chr12	44200146	-	Exon	NM_001242397,NM_002822	1.59011e-19	80.913
chr12	44200166	-	Exon	NM_001242397,NM_002822	1.59011e-19	80.913
chr12	44200200	-	Promoter	NM_001242397,NM_002822	1.59011e-19	80.913
chr12	44200213	-	Promoter	NM_001242397,NM_002822	1.59011e-19	80.913
chr12	44200221	-	Promoter	NM_001242397,NM_002822	1.59011e-19	80.913
chr12	44200234	-	Promoter	NM_001242397,NM_002822	1.59011e-19	80.913
chr12	44200153	-	Exon	NM_001242397,NM_002822	3.29754e-19	80.913
chr12	53244495	-	-	-	1.46712e-11	80.9022
chr21	45363117	-	Intron	NM_020132	2.69734e-05	80.8935
chrX	16803600	-	Promoter	NM_001168683,NM_018360	9.92573e-26	80.8834
chr12	123903719	-	Intron	NM_145058	4.8412e-05	80.8791
chr13	99047618	+	Exon	NM_005766	3.74144e-19	80.8525
chr12	54441309	+	Intron	NM_014620	3.40805e-26	80.8219
chr21	10582964	-	-	-	9.83791e-18	80.814
chr11	117667045	-	Promoter	NM_020693	2.34267e-29	80.7928
chr4	177714039	+	Promoter	NM_005429	2.67432e-16	80.791
chr2	119599460	-	-	-	2.6901e-09	80.788
chr1	18960821	-	Exon	NM_001135254,NM_002584,NM_013945	4.40141e-58	80.7784
chr20	33297098	-	-	-	3.95274e-14	80.7692
chr12	44200210	-	Promoter	NM_001242397,NM_002822	3.62182e-19	80.743
chr13	99142882	-	Intron	NM_001032296,NM_003576	0.000254328	80.7334
chr2	118617464	-	-	-	2.12876e-30	80.7301
chr14	71720975	+	-	-	1.15725e-19	80.7226
chr11	117667059	-	Promoter	NM_020693	3.68932e-29	80.7106
chr15	85290922	+	Promoter	NM_014630	3.54967e-24	80.6909
chr1	4039156	-	-	-	3.09063e-19	80.681
chr19	2893442	+	-	-	2.37619e-05	80.6771
chr11	117667083	-	Promoter	NM_020693	2.34267e-29	80.6665
chr6	42936109	+	-	-	1.02592e-33	80.6658
chr16	14724561	-	Promoter	NM_001134477,NM_001242992,NM_002582	1.23186e-24	80.6462
chr14	105715394	+	Exon	NM_033271	0.00315269	80.6437
chr12	120740777	+	Promoter	NM_012240	1.17921e-13	80.6186
chr2	113563585	-	-	-	1.61e-05	80.6002
chr1	38522768	+	-	-	7.28259e-14	80.5897
chr7	100660668	+	Intron	NM_001164462	1.8072e-28	80.5861
chr11	117667077	-	Promoter	NM_020693	8.33427e-30	80.5702
chr8	37887636	-	Promoter	NM_004095	4.65748e-14	80.567
chr6	37801323	-	Intron	NM_021943	1.36194e-19	80.5556
chr16	2480457	+	Intron	NM_001761	4.82605e-21	80.5195
chr12	54441414	+	Intron	NM_014620	4.01535e-24	80.5174
chr9	84425165	+	-	-	2.40473e-17	80.5039
chr14	105715403	+	Exon	NM_033271	0.00301216	80.5036
chr19	53511718	-	-	-	1.29476e-45	80.4808
chr11	117666983	-	Promoter	NM_020693	6.04143e-29	80.4737
chr15	45409502	+	Exon	NM_207581	0.000262605	80.4657
chr12	114350758	+	Intron	NM_001146698,NM_001146699,NM_016196	0.00133022	80.4348
chr2	14256168	-	-	-	4.3768e-05	80.4248
chr19	45147672	-	Promoter	NM_001135768,NM_001135769,NM_001135770,NM_006505	1.80479e-46	80.4246
chr19	45147699	-	Promoter	NM_001135768,NM_001135769,NM_001135770,NM_006505	1.80479e-46	80.4246
chr1	145599751	-	Intron	NM_006468	2.26339e-07	80.3846
chr14	105715410	+	Exon	NM_033271	0.00315269	80.3351
chr21	36800152	+	-	-	2.4415e-09	80.3241
chr3	195668405	+	-	-	6.01872e-25	80.3087
chr12	44200175	-	Exon	NM_001242397,NM_002822	1.59011e-19	80.3032
chr4	177714120	+	Promoter	NM_005429	1.5976e-14	80.2936
chr2	242959617	+	-	-	3.28437e-14	80.2926
chr13	19316367	-	-	-	1.46996e-05	80.2889
chr13	111211821	+	Intron	NM_017817	1.56575e-07	80.2874
chr14	105715430	+	Promoter	NM_001242789	0.00319318	80.2832
chr17	73893350	+	Promoter	NM_001256124,NM_173547	5.48545e-36	80.2818
chr4	44228141	-	Intron	NM_198353	0.0026067	80.2684
chr4	177714132	+	Promoter	NM_005429	1.37255e-16	80.2586
chr19	14629770	+	Promoter	NM_006145	7.78933e-42	80.2488
chr11	61620029	-	Intron	NM_004265	1.67135e-06	80.2469
chr11	3214356	-	-	-	4.05108e-14	80.2469
chr19	45147676	-	Promoter	NM_001135768,NM_001135769,NM_001135770,NM_006505	1.80479e-46	80.1695
chr16	58983999	-	-	-	1.53891e-11	80.1562
chr18	56339255	-	Promoter	NM_006785,NM_173844	1.92046e-10	80.1431
chr17	40822061	+	Exon	NM_024927	5.41521e-05	80.1303
chr6	27506867	-	-	-	9.97293e-31	80.115
chr12	125740947	+	-	-	2.93145e-29	80.083
chr5	126626086	-	Promoter	NM_001256545,NM_032446	6.25883e-23	80.0768
chr19	45147802	-	Promoter	NM_001135768,NM_001135769,NM_001135770,NM_006505	8.81155e-45	80.0395
chr12	44200218	-	Promoter	NM_001242397,NM_002822	6.9508e-18	80.0358
chr1	26350990	-	Intron	NM_004455	5.87696e-17	80.0233
chr7	5490365	-	-	-	6.24139e-71	80.0201
chr4	177714098	+	Promoter	NM_005429	4.95023e-15	79.9983
chr10	1994832	-	-	-	3.9177e-05	79.971
chr22	20088584	+	Intron	NM_001190326,NM_022720	7.78433e-07	79.9672
chr1	201224212	-	-	-	3.70621e-23	79.9621
chr8	142626946	+	-	-	0.000294816	79.9273
chr17	16283531	+	Promoter	NM_018955	3.29845e-06	79.9057
chr12	44200159	-	Exon	NM_001242397,NM_002822	4.89449e-19	79.902
chr19	1748685	+	-	-	6.66214e-38	79.9004
chr3	19968313	+	Intron	NM_144715	0.00027402	79.8887
chr3	33195442	-	Exon	NM_015551	3.31227e-27	79.887
chr2	10549700	+	Intron	NM_134421	2.01515e-28	79.8854
chr5	1231784	+	Intron	NM_182632	3.04565e-25	79.8434
chr2	106509158	+	Intron	NM_001004722	3.1029e-11	79.8419
chr16	1821089	-	Exon	NM_002513	3.01582e-19	79.8198
chr1	109630104	+	-	-	4.95137e-29	79.7895
chr9	100744987	+	Promoter	NM_006401	3.94072e-44	79.7514
chr16	15951230	+	Promoter	NM_001040113,NM_001040114,NM_002474,NM_022844	3.76331e-09	79.7269
chr6	34122708	+	Promoter	NM_001256809	1.16822e-34	79.7198
chr18	56339260	-	Promoter	NM_006785,NM_173844	1.51565e-06	79.7116
chr18	56339277	-	Promoter	NM_006785,NM_173844	1.51565e-06	79.7116
chr18	56339370	-	Promoter	NM_006785,NM_173844	1.51565e-06	79.7116
chrX	18909186	+	Promoter	NR_029379	4.06085e-07	79.7081
chr15	84824975	-	-	-	4.0748e-35	79.6629
chr1	11791126	-	-	-	2.92749e-30	79.635
chr14	105877422	+	Intron	NM_001195082	0.00117199	79.624
chr19	31398081	-	-	-	5.78165e-29	79.6223
chrX	151849376	-	-	-	1.60946e-14	79.5849
chr4	3337191	-	Intron	NM_002926,NM_198229	6.1768e-35	79.5455
chr6	4482966	+	-	-	3.38359e-08	79.5455
chr14	19890368	-	-	-	1.63594e-34	79.5
chr16	73225228	-	-	-	4.10181e-08	79.4916
chr1	8011093	-	-	-	1.82738e-12	79.4906
chr8	21929387	-	-	-	3.16284e-20	79.4802
chr11	117667093	-	Promoter	NM_020693	4.54335e-27	79.4787
chr9	37466778	-	-	-	2.23367e-44	79.4653
chr11	44598082	-	Intron	NM_001024844,NM_002231	1.01143e-27	79.4521
chr2	45203113	+	-	-	2.73316e-19	79.4253
chr6	107363283	-	-	-	0.000195563	79.4137
chr16	1210418	+	Intron	NM_001005407,NM_021098	3.02263e-15	79.4118
chr17	48545611	-	Exon	NM_001267	8.58069e-54	79.4116
chr15	100170787	-	Intron	NM_005587	3.60084e-30	79.369
chr14	105559943	+	-	-	8.41517e-42	79.3661
chr9	22142609	+	-	-	1.56391e-15	79.3608
chr11	17035018	+	Promoter	NM_175058	3.4042e-14	79.3469
chr8	58979273	-	Intron	NM_147189	3.65591e-52	79.3369
chr9	137922643	-	-	-	2.34037e-13	79.2904
chr16	89762515	-	Exon	NM_001098533,NM_001160367,NM_052988,NR_027702	3.3076e-10	79.2741
chr20	60898566	+	Exon	NM_005560	2.17324e-18	79.2023
chr3	134083082	+	Intron	NM_016201	2.31565e-27	79.1861
chr16	56617887	+	-	-	3.44154e-28	79.1667
chr5	33794463	+	Intron	NM_030955	1.87639e-12	79.1667
chr14	105559883	+	-	-	6.42293e-42	79.1531
chr21	45933064	+	Intron	NM_144991	1.29508e-33	79.1519
chr14	105559987	+	-	-	6.42293e-42	79.1486
chr14	105559885	+	-	-	6.42293e-42	79.1328
chr14	105559917	+	-	-	6.42293e-42	79.1328
chr14	105559946	+	-	-	6.42293e-42	79.1328
chr14	105559952	+	-	-	6.42293e-42	79.1328
chr9	15307424	+	Promoter	NM_001168339,NM_001168340,NM_001168341,NM_152574	1.33657e-34	79.1174
chr1	121110122	+	-	-	4.35476e-38	79.0857
chr17	47953279	+	-	-	4.229e-39	79.0764
chr8	37756027	+	Promoter	NM_001002814,NM_025151	4.46293e-16	79.0652
chr2	220507564	-	-	-	4.11031e-07	79.0645
chr16	31499114	-	-	-	4.93712e-16	79.0503
chr16	1210449	+	Intron	NM_001005407,NM_021098	3.02263e-15	79.0386
chr1	6512635	+	Intron	NM_031475	8.22172e-06	79.0367
chr22	19706186	+	Exon	NM_001009939	2.83812e-37	79.0298
chr8	10590146	+	-	-	5.56156e-18	79.0164
chrX	24413588	+	-	-	2.0151e-23	79.0154
chr1	150488314	-	Exon	NR_051960	2.49569e-40	79.0111
chr9	136393162	-	-	-	1.32784e-14	78.9855
chr1	16509356	-	-	-	6.06443e-07	78.9423
chr3	84063122	+	-	-	1.91789e-10	78.9265
chr6	21631972	+	-	-	2.12991e-20	78.9163
chr18	13511367	+	Intron	NM_181481,NM_181482	4.26825e-31	78.9161
chr19	49195059	+	-	-	7.29163e-15	78.912
chr15	41202345	-	-	-	2.06292e-43	78.909
chr16	89768854	+	Promoter	NM_152339	1.21307e-51	78.892
chr14	105559881	+	-	-	3.54273e-40	78.8913
chr14	105559904	+	-	-	3.54273e-40	78.8913
chr3	124209826	-	-	-	0.00039011	78.8732
chr16	1210393	+	Intron	NM_001005407,NM_021098	3.4695e-14	78.8623
chr20	23092744	-	-	-	4.41811e-45	78.8535
chr11	50276628	+	-	-	2.63426e-47	78.8488
chr7	139681210	+	Intron	NM_001061,NM_001130966,NM_001166253,NM_001166254,NM_030984,NR_029394	9.41558e-23	78.8376
chr16	89768766	+	Promoter	NM_152339	1.81823e-50	78.7791
chr12	54409451	-	-	-	4.32353e-18	78.7759
chr8	145669819	-	Promoter	NM_013432	0.000166964	78.768
chr22	38009749	+	Intron	NM_001172688	1.21325e-19	78.7611
chr10	56782136	+	-	-	1.19852e-06	78.7594
chr15	45409421	+	Exon	NM_207581	2.25264e-06	78.7234
chr5	177669722	-	Intron	NM_173465	8.92956e-17	78.7213
chr8	131058369	+	-	-	1.16826e-35	78.6839
chr16	33627705	-	-	-	1.81908e-14	78.6624
chr17	29886984	-	Promoter	NR_029710	6.80379e-28	78.6417
chr1	2253851	-	Intron	NM_024848	1.31013e-37	78.6364
chr16	89768758	+	Promoter	NM_152339	4.09375e-49	78.6304
chr1	237205935	+	Promoter	NM_001035	2.52969e-39	78.5972
chr6	34122664	+	Promoter	NM_001256809	2.1018e-33	78.5771
chr19	1923278	-	Intron	NM_079834	6.40244e-05	78.5714
chr17	76935277	-	-	-	4.75678e-31	78.549
chr10	134001709	+	Intron	NM_006426	2.27667e-42	78.5328
chr9	129988393	-	-	-	2.82401e-19	78.4946
chr10	77542483	+	Promoter	NM_032024	1.18769e-09	78.4852
chr1	161129477	+	Promoter	NM_001014443,NM_012475	4.88023e-12	78.4632
chr14	105559922	+	-	-	2.63529e-38	78.4504
chr8	139783991	-	Intron	NM_152888	8.40688e-08	78.436
chrX	71034535	+	-	-	1.67209e-19	78.4286
chr16	1821116	-	Exon	NM_002513	1.42741e-17	78.422
chr16	1821191	-	Promoter	NM_002513	1.42741e-17	78.422
chr16	1821197	-	Promoter	NM_002513	1.42741e-17	78.422
chr16	1821201	-	Promoter	NM_002513	1.42741e-17	78.422
chr22	42316198	+	-	-	1.10869e-15	78.4091
chr12	132433723	-	Promoter	NM_015409	1.86579e-22	78.4085
chr9	123691574	-	Promoter	NM_001190945	8.59652e-45	78.3995
chr7	75896703	+	Exon	NM_001110199	2.19924e-15	78.3929
chr5	43044687	-	-	-	1.50441e-32	78.3888
chr18	33877877	+	Exon	NM_025135	1.39478e-11	78.3796
chr17	46074665	-	-	-	4.22659e-06	78.3673
chr5	3197996	+	-	-	7.59709e-30	78.3513
chr9	137718046	-	-	-	4.59236e-36	78.3443
chr5	149863211	-	-	-	0.00169812	78.3333
chr12	132899962	-	Intron	NM_001122636	6.84753e-05	78.3179
chr17	79007715	+	Promoter	NR_026857	3.54231e-16	78.289
chr17	80063599	+	Intron	NM_198082	9.9987e-30	78.2759
chr6	34122557	+	Promoter	NM_001256809	7.25576e-33	78.2411
chr16	1821177	-	Promoter	NM_002513	4.7811e-17	78.2343
chr16	1821167	-	Exon	NM_002513	2.45856e-17	78.2204
chr7	129142398	+	Exon	NM_001195243	4.33851e-13	78.2203
chr7	129142401	+	Exon	NM_001195243	4.33851e-13	78.2203
chr7	129142413	+	Exon	NM_001195243	4.33851e-13	78.2203
chr7	129142415	+	Exon	NM_001195243	4.33851e-13	78.2203
chr7	129142437	+	Exon	NM_001195243	4.33851e-13	78.2203
chr7	129142445	+	Exon	NM_001195243	4.33851e-13	78.2203
chr14	105559874	+	-	-	6.42293e-42	78.2097
chr14	105877426	+	Intron	NM_001195082	0.00192598	78.2013
chr14	105877551	+	Intron	NM_001195082	0.00192598	78.2013
chr12	54441326	+	Intron	NM_014620	4.31928e-26	78.1671
chr7	149196375	-	-	-	1.47668e-37	78.1633
chr22	42316161	+	-	-	1.10871e-15	78.1403
chr11	1968981	-	Promoter	NM_021134	8.87247e-11	78.1083
chr19	17326584	-	Promoter	NM_018467	1.10455e-14	78.0754
chr15	45409373	+	Exon	NM_207581	2.64466e-06	78.0695
chr19	10590809	-	-	-	4.74416e-06	78.0255
chr17	73620488	-	-	-	1.05656e-15	78.0254
chr16	1821127	-	Exon	NM_002513	4.19129e-17	78.0187
chr3	16925821	+	Promoter	NM_001144382	1.34115e-21	78.0099
chr8	124522578	-	Intron	NM_058229,NM_148177	0.00114719	78
chr10	133992371	-	Intron	NM_001105521	1.02724e-34	77.9917
chr15	45409492	+	Exon	NM_207581	3.50529e-06	77.9848
chr19	11476400	-	-	-	3.20763e-50	77.9801
chr15	45409382	+	Exon	NM_207581	3.50529e-06	77.9795
chr15	45409456	+	Exon	NM_207581	3.50529e-06	77.9795
chr8	24802023	-	-	-	3.22491e-35	77.9476
chr5	43044676	-	-	-	1.50441e-32	77.9463
chr6	34122704	+	Promoter	NM_001256809	2.47284e-32	77.9437
chr11	1969003	-	Promoter	NM_021134	1.0665e-10	77.9324
chr11	1969020	-	Promoter	NM_021134	1.0665e-10	77.9324
chr9	140783025	+	Intron	NM_000718,NM_001243812	5.43514e-10	77.9245
chr16	1821112	-	Exon	NM_002513	2.45856e-17	77.9237
chr9	79093421	+	Exon	NM_001097635	2.76605e-16	77.9115
chr6	34122599	+	Promoter	NM_001256809	5.27257e-32	77.9024
chr12	125435065	+	-	-	1.22584e-17	77.8652
chr10	71266621	+	-	-	6.94231e-17	77.8326
chr16	89019639	-	Intron	NM_005187	2.24565e-48	77.8178
chr15	45409384	+	Exon	NM_207581	3.50529e-06	77.7932
chr11	123185920	-	-	-	4.63907e-09	77.7778
chr7	129142386	+	Exon	NM_001195243	4.33851e-13	77.7739
chr7	129142468	+	Exon	NM_001195243	4.33851e-13	77.7739
chr11	1968940	-	Promoter	NM_021134	1.0665e-10	77.7493
chr11	1969000	-	Promoter	NM_021134	1.0665e-10	77.7493
chr14	105559896	+	-	-	8.41517e-42	77.738
chr11	55973950	+	-	-	3.62503e-06	77.7136
chr18	19559002	-	-	-	2.86238e-44	77.6961
chr6	34122690	+	Promoter	NM_001256809	1.35581e-30	77.6642
chr13	30753625	-	-	-	9.70489e-37	77.6525
chr9	138388804	-	Intron	NM_144654	5.49522e-18	77.6457
chr12	125478426	-	Exon	NM_080626	3.86925e-24	77.636
chr9	130565311	-	Promoter	NM_001018078	5.30683e-27	77.6297
chr1	23036851	-	Promoter	NM_004442,NM_017449	5.70733e-10	77.6255
chr19	3268549	-	Intron	NM_001172673,NM_021938,NR_033342	3.34574e-06	77.6119
chr11	1968991	-	Promoter	NM_021134	1.0665e-10	77.6042
chr6	34122701	+	Promoter	NM_001256809	2.47284e-32	77.5865
chr3	126243852	-	Promoter	NM_152889	3.28683e-20	77.5781
chr1	23036755	-	Promoter	NM_004442,NM_017449	5.70733e-10	77.5564
chr1	23036841	-	Promoter	NM_004442,NM_017449	5.70733e-10	77.5564
chr15	40660155	+	Exon	NM_033510	4.87453e-17	77.5424
chr2	154335155	+	Exon	NM_019845	2.551e-08	77.5266
chr12	25879867	+	-	-	1.70452e-09	77.5174
chr10	133992390	-	Intron	NM_001105521	1.02724e-34	77.5122
chr1	23036835	-	Promoter	NM_004442,NM_017449	5.70733e-10	77.512
chr14	105949025	-	-	-	2.53638e-13	77.4888
chr11	65755334	-	-	-	3.99763e-09	77.4685
chr6	34122688	+	Promoter	NM_001256809	1.35581e-30	77.4521
chr9	114245403	-	Intron	NM_001080398	3.60698e-25	77.4352
chr1	944300	+	-	-	8.83279e-37	77.4313
chr12	54441289	+	Intron	NM_014620	2.0772e-23	77.4208
chr8	102182542	+	-	-	1.24133e-23	77.4182
chr15	45409475	+	Exon	NM_207581	3.50529e-06	77.4123
chr19	5838154	-	Intron	NM_001040701	2.32746e-36	77.4038
chr19	54720475	-	-	-	8.36082e-19	77.4026
chr15	45409454	+	Exon	NM_207581	3.97907e-06	77.3957
chr11	1968986	-	Promoter	NM_021134	1.0665e-10	77.381
chrX	48930584	-	Intron	NM_007213	3.06582e-07	77.3701
chr9	114245260	-	Intron	NM_001080398	2.8032e-25	77.367
chr9	114245270	-	Intron	NM_001080398	2.8032e-25	77.367
chr9	114245395	-	Intron	NM_001080398	2.8032e-25	77.367
chr10	45120904	+	-	-	1.73449e-09	77.3061
chr2	100186172	+	Intron	NM_001025108,NM_002285	5.28529e-51	77.2869
chr20	2098252	-	-	-	2.24282e-12	77.2747
chr5	43044704	-	-	-	5.55644e-31	77.2538
chr16	89989731	-	Promoter	NM_006086	2.19274e-23	77.246
chr14	105877439	+	Intron	NM_001195082	0.00248325	77.2209
chr17	25795139	-	-	-	1.36195e-08	77.1786
chr12	53718740	-	-	-	1.60558e-24	77.1749
chr1	23897871	-	-	-	8.07152e-23	77.1605
chr20	32892419	-	Intron	NM_001161766	1.6355e-08	77.1371
chr1	226925650	+	Intron	NM_002221	6.94763e-09	77.1163
chr7	129142435	+	Exon	NM_001195243	1.07797e-11	77.0994
chr1	21564183	+	-	-	1.55883e-30	77.0981
chr6	34122601	+	Promoter	NM_001256809	2.85709e-30	77.0768
chr16	1821123	-	Exon	NM_002513	2.16527e-16	77.0706
chr16	1821133	-	Exon	NM_002513	2.16527e-16	77.0706
chr22	17443047	-	Exon	NM_001037814	4.82229e-42	77.0642
chr7	129142451	+	Exon	NM_001195243	4.33851e-13	77.0493
chr11	1968952	-	Promoter	NM_021134	3.83995e-10	77.0233
chr22	23792039	-	-	-	5.02933e-32	77.0213
chr16	89989733	-	Promoter	NM_006086	3.85896e-23	77.0187
chr16	89989739	-	Promoter	NM_006086	2.19274e-23	77.0156
chr5	53606648	-	Promoter	NM_019087	2.45576e-17	77.0075
chr18	77157797	+	Intron	NM_172388	1.85466e-20	77.0059
chr2	95527728	-	-	-	1.98899e-14	76.9872
chr22	43117092	-	Promoter	NM_017436	1.24765e-32	76.9865
chr22	43117121	-	Promoter	NM_017436	1.24765e-32	76.9865
chr8	72473601	-	-	-	7.59379e-14	76.9812
chr10	76573204	-	-	-	2.13701e-24	76.9488
chr9	139250363	+	Intron	NM_001145638,NM_001145639,NM_001200003	2.1343e-25	76.9231
chr16	89989663	-	Promoter	NM_006086	8.20756e-23	76.9199
chr17	42453027	-	Exon	NM_000419	5.72098e-63	76.9168
chr8	98787677	-	Promoter	NM_018407	0.00317825	76.9144
chr12	102091270	-	Promoter	NM_020244	2.44688e-18	76.9059
chr13	112985424	+	-	-	3.92833e-10	76.9052
chr16	89989647	-	Promoter	NM_006086	3.85896e-23	76.9038
chr16	89989657	-	Promoter	NM_006086	3.85896e-23	76.9038
chr16	89989670	-	Promoter	NM_006086	3.85896e-23	76.9038
chr16	89989729	-	Promoter	NM_006086	3.85896e-23	76.9038
chr6	99963855	-	Promoter	NM_001080481	3.72386e-22	76.893
chr22	43117097	-	Promoter	NM_017436	1.24765e-32	76.8615
chr11	10955519	+	-	-	1.16014e-27	76.8582
chr14	93620662	-	-	-	0.00328878	76.8254
chr9	114245298	-	Intron	NM_001080398	1.03617e-24	76.7942
chr16	89989737	-	Promoter	NM_006086	3.85896e-23	76.7888
chr10	28019785	+	Intron	NM_001242702,NM_173576	7.80948e-26	76.7806
chr1	18679165	-	Intron	NM_032880	2.31724e-32	76.7568
chr11	111790122	-	Promoter	NM_080659	1.97295e-34	76.7542
chr7	129142378	+	Exon	NM_001195243	1.54348e-11	76.7497
chr12	118852400	+	-	-	3.92993e-06	76.7397
chr1	1115188	-	Promoter	NM_153254	1.57276e-08	76.7023
chr1	150488322	-	Exon	NR_051960	1.69603e-45	76.6739
chr1	150488410	-	Exon	NR_051960	1.69603e-45	76.6739
chr1	150488404	-	Exon	NR_051960	1.69981e-45	76.6739
chr16	12612943	+	Intron	NM_032167	4.77127e-05	76.6724
chr16	79263245	-	-	-	2.93127e-11	76.6667
chr19	46012689	-	Intron	NM_003370	9.65408e-14	76.6534
chr22	43117094	-	Promoter	NM_017436	2.94212e-32	76.6319
chr22	43117174	-	Promoter	NM_017436	3.35665e-32	76.6009
chr11	62464589	-	Intron	NM_001122955,NM_001130702,NM_032667,NR_037946,NR_037948,NR_037949	0.00225895	76.5934
chr9	138106329	-	-	-	1.00793e-37	76.5883
chr5	41637614	+	-	-	3.38065e-23	76.5714
chr16	89875609	+	Intron	NM_000135,NM_001018112	2.38194e-09	76.5641
chr12	133159504	+	Intron	NM_001142641	2.16359e-15	76.5504
chr5	79449002	+	-	-	1.26569e-21	76.4883
chr5	149792113	-	Promoter	NM_001025158,NM_001025159,NM_004355	1.11516e-31	76.4801
chr19	36018425	-	Exon	NM_001166034	1.09833e-16	76.4223
chrX	30631323	-	-	-	4.00967e-26	76.3819
chr15	45409391	+	Exon	NM_207581	1.11503e-05	76.3788
chr1	23036825	-	Promoter	NM_004442,NM_017449	7.02264e-09	76.3688
chr1	150488356	-	Exon	NR_051960	1.0248e-43	76.3553
chr8	144294212	+	-	-	7.28057e-19	76.3441
chr9	114245392	-	Intron	NM_001080398	1.06823e-22	76.3361
chr8	37887506	-	Promoter	NM_004095	6.57427e-17	76.3085
chr8	60491338	+	-	-	1.54702e-24	76.2821
chrX	70320925	+	Exon	NM_001170931,NM_005938	1.17966e-10	76.2542
chr9	114245362	-	Intron	NM_001080398	3.91642e-24	76.25
chr1	150488400	-	Exon	NR_051960	1.14804e-44	76.2493
chr7	27138626	-	Intron	NR_038367	1.302e-07	76.2129
chr7	129142453	+	Exon	NM_001195243	1.56032e-12	76.2121
chr4	163163995	-	-	-	1.68851e-13	76.1855
chr1	244527568	-	-	-	5.69848e-12	76.1827
chr14	101037945	-	-	-	6.83481e-11	76.176
chr16	1476786	+	Intron	NM_001010878	9.75772e-15	76.1682
chr7	64035315	+	-	-	1.65501e-55	76.1547
chr12	29762857	-	Intron	NM_001193451,NM_175861	0.00052518	76.148
chr10	15001494	+	Exon	NM_001080836	1.29499e-59	76.1338
chr9	137406752	-	-	-	6.92242e-09	76.1325
chr1	216239670	+	Intron	NM_206933	2.49097e-17	76.1262
chr22	49355813	+	-	-	2.59197e-05	76.1134
chr12	113993119	-	-	-	1.05555e-11	76.1086
chr17	28706472	+	Exon	NM_001304	1.27219e-35	76.0646
chr7	64035393	+	-	-	1.65501e-55	76.0307
chr5	43044715	-	-	-	1.22438e-35	76.014
chr7	64035321	+	-	-	1.62118e-53	76.0059
chr17	2493192	+	-	-	2.78824e-34	75.9953
chr1	16084591	-	Promoter	NM_017556	2.33334e-22	75.985
chr1	70666118	+	-	-	1.79516e-18	75.9705
chr20	61939933	+	Exon	NM_020882	7.14451e-11	75.9698
chr1	150488344	-	Exon	NR_051960	7.06958e-41	75.9596
chr22	43117198	-	Promoter	NM_017436	6.94474e-30	75.9523
chr17	79699089	-	-	-	4.34752e-16	75.952
chr1	42928919	+	-	-	4.53202e-28	75.9482
chr20	44985505	-	Intron	NM_015945,NM_173073,NM_173179	2.07539e-11	75.9434
chr10	15001407	+	Promoter	NM_001080836	4.57881e-53	75.9248
chr12	29762978	-	Intron	NM_001193451,NM_175861	0.00060905	75.9207
chr19	49232497	+	Exon	NM_017805	3.93862e-46	75.9167
chrX	53078276	-	Promoter	NM_018969	1.65578e-29	75.9038
chr1	150488416	-	Exon	NR_051960	1.02791e-43	75.8863
chr8	129125818	-	-	-	8.226e-24	75.8772
chr16	89989684	-	Promoter	NM_006086	3.85896e-23	75.8666
chr16	85196992	-	-	-	3.18031e-17	75.8403
chr1	85513875	-	Promoter	NM_001253693,NM_018298	5.19747e-42	75.8262
chr19	41843954	-	Intron	NM_000660	3.22833e-06	75.8242
chr11	69473291	-	-	-	2.52689e-21	75.8065
chr1	16450526	+	-	-	6.33345e-16	75.7919
chr2	74729769	-	Exon	NR_024606	6.59971e-37	75.7802
chrX	100471411	+	-	-	2.00549e-30	75.7709
chr9	133809026	-	Intron	NM_001145106,NM_032843	4.09521e-14	75.7607
chr18	76136163	-	-	-	3.16272e-15	75.7576
chr6	110798441	+	Promoter	NM_033125	2.11505e-44	75.7445
chr3	71721344	+	-	-	1.44458e-16	75.7422
chr1	183567262	+	-	-	5.88973e-21	75.7072
chr6	163788264	-	-	-	6.5711e-66	75.7042
chr1	56919183	-	-	-	8.8295e-17	75.7032
chr17	8020662	+	Intron	NM_001165960,NM_021628	4.47795e-40	75.6815
chr2	203458262	+	-	-	9.18063e-09	75.6805
chr3	129310146	+	Intron	NM_015103	2.13154e-10	75.6667
chr19	17745841	-	Intron	NM_001080421	1.0574e-05	75.6579
chr4	8863709	+	-	-	6.67214e-77	75.6518
chr1	2030798	-	Intron	NM_002744	1.22721e-16	75.6396
chr3	150481119	-	Exon	NM_005067	3.77627e-08	75.6211
chr15	85201706	-	Exon	NM_021077,NM_205858	1.4116e-08	75.6173
chr11	117403134	-	Exon	NM_020693	1.78079e-32	75.6096
chr13	57573525	+	-	-	2.51162e-27	75.5945
chr19	55897897	-	Promoter	NM_000991,NM_001136134,NM_001136135,NM_001136136,NM_001136137	1.39967e-10	75.5856
chr10	130478543	-	-	-	8.3158e-70	75.5588
chr6	53408993	-	Promoter	NM_001197115,NM_001498	2.58887e-15	75.5464
chr6	53409122	-	Promoter	NM_001197115,NM_001498	2.58887e-15	75.5464
chr6	53409124	-	Promoter	NM_001197115,NM_001498	2.58887e-15	75.5464
chr6	53409133	-	Promoter	NM_001197115,NM_001498	2.58887e-15	75.5464
chr6	53409145	-	Promoter	NM_001197115,NM_001498	2.58887e-15	75.5464
chr8	1772476	+	Promoter	NM_014629	9.12417e-08	75.5301
chr10	115611914	+	-	-	4.08031e-06	75.5292
chr12	52995209	-	Exon	NM_001146225,NM_001146226,NM_080747	1.86745e-13	75.5284
chr9	138106294	-	-	-	4.1507e-28	75.5154
chr8	146057138	-	Intron	NM_003416	5.74028e-12	75.5142
chr4	35659335	-	-	-	2.18065e-19	75.5058
chr18	55290131	-	Promoter	NM_004539	6.69855e-13	75.4995
chrX	152199419	-	-	-	1.81115e-12	75.4902
chr11	70006082	-	-	-	6.13335e-09	75.462
chr11	68214120	-	Intron	NM_002335	2.1648e-14	75.4355
chr19	446600	+	Intron	NM_012435	7.78086e-38	75.394
chr19	38717880	-	Intron	NM_001135156	3.41147e-18	75.3875
chr17	79007703	+	Promoter	NR_026857	3.07814e-16	75.3791
chr17	11822159	+	Intron	NM_001372,NM_004662	7.69182e-06	75.3289
chr1	150488363	-	Exon	NR_051960	1.80423e-41	75.3234
chr22	22876033	+	-	-	7.51905e-40	75.3219
chr17	10196984	+	-	-	0.00313908	75.3139
chr4	47840038	-	Exon	NM_006587	9.12122e-37	75.312
chr8	134060042	+	Intron	NM_003235	7.27319e-20	75.2991
chr2	238459905	-	Intron	NM_001042467,NM_024101	2.76135e-26	75.2964
chr3	150481148	-	Exon	NM_005067	4.08266e-09	75.2954
chr3	150481200	-	Exon	NM_005067	4.08266e-09	75.2954
chr17	80935459	+	Intron	NM_001009905	3.66386e-46	75.2855
chr16	89989765	-	Promoter	NM_006086	1.35986e-21	75.2785
chr3	150481208	-	Exon	NM_005067	4.08266e-09	75.2739
chr17	18601240	-	-	-	4.86231e-20	75.2689
chr17	18601265	-	-	-	1.13379e-19	75.2689
chr19	14474375	+	-	-	1.69946e-09	75.2404
chr11	2468333	-	Intron	NM_000218	1.23344e-46	75.2364
chr3	187685982	+	-	-	3.56017e-20	75.2309
chr5	130605924	+	Intron	NM_020240	2.55854e-23	75.1944
chr2	74181171	+	Intron	NM_080918	4.36296e-10	75.1555
chr15	24747003	+	-	-	9.64185e-26	75.1421
chr14	76445985	-	Intron	NM_003239	3.56294e-20	75.098
chr19	1748807	+	-	-	4.95433e-37	75.0909
chrX	9363455	-	-	-	3.654e-07	75.0842
chr22	43117217	-	Promoter	NM_017436	2.34565e-29	75.0338
chr16	79024451	+	Intron	NM_016373	8.25301e-24	75.0128
chr15	74215831	-	Intron	NR_040070	6.82009e-36	75
chr20	61035769	+	-	-	4.34138e-15	75
chr14	71107545	-	Promoter	NM_015351	1.71873e-26	74.9937
chr2	73114783	+	Exon	NM_003124	1.85648e-31	74.991
chr9	136340067	-	-	-	1.43226e-38	74.9365
chr19	7983909	+	Exon	NM_001195259	2.73784e-17	74.9196
chr11	118972533	+	Exon	NM_001382	7.42141e-08	74.8922
chr19	15560259	-	Promoter	NM_021241	8.08726e-39	74.8907
chr9	126140064	+	Exon	NM_173689	6.06092e-09	74.8898
chr10	134801942	-	-	-	5.4077e-24	74.8826
chr10	134801954	-	-	-	5.4077e-24	74.8826
chr1	243651458	+	Intron	NM_006642	3.11727e-25	74.8561
chr19	15560216	-	Promoter	NM_021241	8.08726e-39	74.8341
chr6	40638833	-	-	-	2.20352e-15	74.8321
chr16	31214276	-	Promoter	NM_013258,NM_145182	7.55142e-30	74.8314
chr14	105621888	-	Intron	NM_002226,NM_145159	1.1301e-08	74.8095
chr6	53409154	-	Promoter	NM_001197115,NM_001498	1.62425e-15	74.8065
chr19	15560235	-	Promoter	NM_021241	2.3395e-38	74.7879
chr3	150481211	-	Exon	NM_005067	4.08266e-09	74.7663
chr1	110439611	+	-	-	2.24077e-29	74.7447
chr12	125670193	-	-	-	3.74907e-38	74.71
chr19	14323058	-	-	-	1.03055e-12	74.6863
chr10	131005810	-	-	-	2.88468e-45	74.6687
chr8	29357104	+	-	-	1.63976e-16	74.6022
chr6	166331334	-	-	-	2.40872e-16	74.6004
chr8	140893308	-	Intron	NM_001160372,NM_031466	2.91787e-26	74.6002
chr12	112011844	-	Intron	NM_002973	8.44772e-19	74.5734
chr22	19706134	+	Exon	NM_001009939	5.00759e-25	74.5473
chr22	19706192	+	Exon	NM_001009939	5.00759e-25	74.5473
chr16	89989150	+	Promoter	NM_001197181	1.9179e-10	74.5412
chr15	50696853	-	-	-	9.70829e-16	74.5254
chr7	4308991	+	-	-	6.75213e-07	74.5233
chr4	170192000	+	Promoter	NM_020870	5.40392e-13	74.5211
chr19	7983892	+	Exon	NM_001195259	2.73784e-17	74.5196
chr5	3197901	+	-	-	5.24083e-32	74.5185
chr5	3197895	+	-	-	7.35159e-32	74.5185
chr19	15560190	-	Promoter	NM_021241	1.5711e-38	74.5079
chr19	15560218	-	Promoter	NM_021241	9.21347e-38	74.5029
chr3	150481127	-	Exon	NM_005067	4.08266e-09	74.5018
chr17	28706676	+	Exon	NM_001304	1.97523e-10	74.483
chr12	132107039	-	-	-	1.41288e-12	74.4778
chr3	21418067	-	-	-	0.00217268	74.4681
chr10	134802056	-	-	-	3.08309e-23	74.4131
chr8	71509628	+	-	-	0.000428265	74.3976
chr5	3197910	+	-	-	6.20433e-32	74.3974
chr2	45203263	+	-	-	6.67904e-18	74.3939
chr8	144652016	+	-	-	0.00134433	74.3789
chr17	78999636	-	-	-	5.1685e-35	74.3646
chr2	235404823	+	Exon	NM_005737	0.000186985	74.3623
chr2	235404855	+	Exon	NM_005737	0.000186985	74.3623
chr2	235404871	+	Exon	NM_005737	0.000186985	74.3623
chr2	235404885	+	Exon	NM_005737	0.000186985	74.3623
chr2	235404888	+	Exon	NM_005737	0.000186985	74.3623
chr2	235404913	+	Exon	NM_005737	0.000186985	74.3623
chr16	3097157	-	Promoter	NM_022468	7.24821e-08	74.3594
chr10	135054953	-	Exon	NM_014468	4.72442e-09	74.3559
chr9	81955023	+	-	-	6.21475e-14	74.3484
chr4	170192039	+	Promoter	NM_020870	1.3285e-11	74.3478
chr15	74521263	+	-	-	4.37451e-14	74.3197
chr3	128722306	+	Intron	NM_024768	1.13425e-27	74.2961
chr19	36246906	+	Intron	NM_144617	1.02539e-60	74.2909
chr19	15560243	-	Promoter	NM_021241	2.72049e-38	74.2864
chr5	3197992	+	-	-	5.24083e-32	74.2764
chr7	73915744	+	Intron	NM_001199207,NM_005685,NM_016328	6.46237e-30	74.2388
chr5	92265	+	-	-	1.35774e-40	74.2157
chr20	3827242	-	Promoter	NM_001206491,NM_020746,NR_037921	1.44508e-15	74.2155
chr19	53540943	+	-	-	1.71311e-26	74.2066
chr20	61279323	-	Intron	NM_016354	1.83089e-20	74.1899
chr10	135187726	-	Promoter	NM_004092	1.74815e-35	74.1552
chr2	79599050	+	-	-	1.2268e-38	74.1517
chr17	9988211	-	Intron	NM_201433	5.22697e-18	74.1379
chr10	101990371	+	-	-	1.39581e-30	74.1202
chr16	1210395	+	Intron	NM_001005407,NM_021098	2.56012e-13	74.12
chr5	178878736	+	-	-	1.55099e-13	74.0948
chr4	220868	+	Intron	NR_027481	3.26907e-27	74.0924
chr17	75135860	-	Intron	NM_001204408,NM_001204410	2.66313e-15	74.0858
chr5	676423	-	Intron	NM_007030	5.83546e-21	74.0674
chrX	40505420	-	Intron	NM_144970	0.00114749	74.053
chr5	2382012	+	-	-	8.06916e-19	74.0517
chr17	18601253	-	-	-	4.86231e-20	74.0475
chr17	18601261	-	-	-	4.86231e-20	74.0475
chrX	49125947	-	Promoter	NM_001184745,NM_033215	9.95653e-30	74.0374
chr12	4536160	-	-	-	1.41444e-09	74.0359
chr15	65625010	-	Intron	NM_004884	3.10333e-22	74.0283
chr1	246483802	+	Intron	NM_001167740,NM_022743	2.40271e-25	74.0209
chr19	53540896	+	-	-	4.18496e-24	74.0013
chr3	150481161	-	Exon	NM_005067	1.22008e-08	73.9955
chr1	28832638	+	Promoter	NM_001048199,NR_002909,NR_030725,NR_030726,NR_036473	2.16713e-05	73.9902
chr19	53540899	+	-	-	7.64833e-25	73.9873
chr22	19706171	+	Exon	NM_001009939	2.45941e-23	73.9715
chr3	135825622	+	Intron	NM_001190447,NM_002718,NM_181897	1.82729e-05	73.9689
chr11	64067500	+	Exon	NM_033310	1.1167e-21	73.9478
chr11	65341947	-	-	-	6.361e-17	73.9459
chr2	47028566	-	-	-	1.13791e-07	73.945
chr12	60787751	+	-	-	4.4305e-20	73.9405
chr8	59575861	+	-	-	9.91295e-33	73.9211
chr10	115611951	+	-	-	4.16623e-06	73.9163
chr19	3106973	-	Intron	NM_002067	0.000102198	73.913
chr2	235404932	+	Exon	NM_005737	5.63917e-31	73.8928
chr11	10955415	+	-	-	5.07927e-20	73.8926
chr17	40203338	-	-	-	8.49363e-08	73.8908
chr12	57634578	-	Promoter	NM_020142	8.39613e-28	73.8734
chr11	134442728	-	-	-	7.05497e-14	73.8636
chr2	235404868	+	Exon	NM_005737	0.000186985	73.8495
chr12	1908476	-	Intron	NM_172364	6.92507e-28	73.8353
chr7	495408	-	-	-	0.000727071	73.8095
chr9	114245306	-	Intron	NM_001080398	6.26394e-20	73.8005
chr6	167898953	-	-	-	2.49939e-19	73.7756
chr1	229223948	+	-	-	4.77765e-17	73.7733
chr19	54484295	+	Intron	NM_031895	2.98419e-19	73.7594
chr3	196593811	+	-	-	0.000977407	73.7459
chr9	139234178	-	-	-	3.28932e-23	73.7454
chr18	56452116	-	-	-	6.91991e-17	73.7364
chr20	50287889	+	Intron	NM_006045	1.44113e-24	73.7292
chr4	6450440	-	Intron	NM_001206994,NM_001206995	5.18606e-08	73.7208
chr6	36842446	-	Promoter	NM_016059	4.39763e-20	73.6959
chr11	35440864	+	Exon	NM_004171	1.22863e-15	73.6937
chr2	7005122	-	Promoter	NM_001256477,NM_001256478,NM_207315	6.39192e-16	73.6904
chr13	99456384	-	Intron	NM_001130048,NM_015296	2.68324e-17	73.6884
chr19	12995819	+	Exon	NM_006563	3.84068e-26	73.677
[truncated: 9,766 more rows]

## Sheet: 12 weeks PC left
Asymmetrically methylated CpG sites in the left spinal cord at 12 weeks PC
[truncated: 281,120+ more rows]

[truncated: 1 more sheets: 12 weeks PC right]
